# Supplementary material for: Aryl Hydrocarbon Receptor (AhR) Activation by 2,3,7,8-Tetrachlorodibenzo-p-Dioxin (TCDD) Dose-Dependently Shifts the Gut Microbiome Consistent with the Progression of Non-Alcoholic Fatty Liver Disease
Source: MDPI journal article supplement (doi:10.3390/ijms222212431), 2021-11-18
Supplement: s1 [file s1]

## Supplemental Material

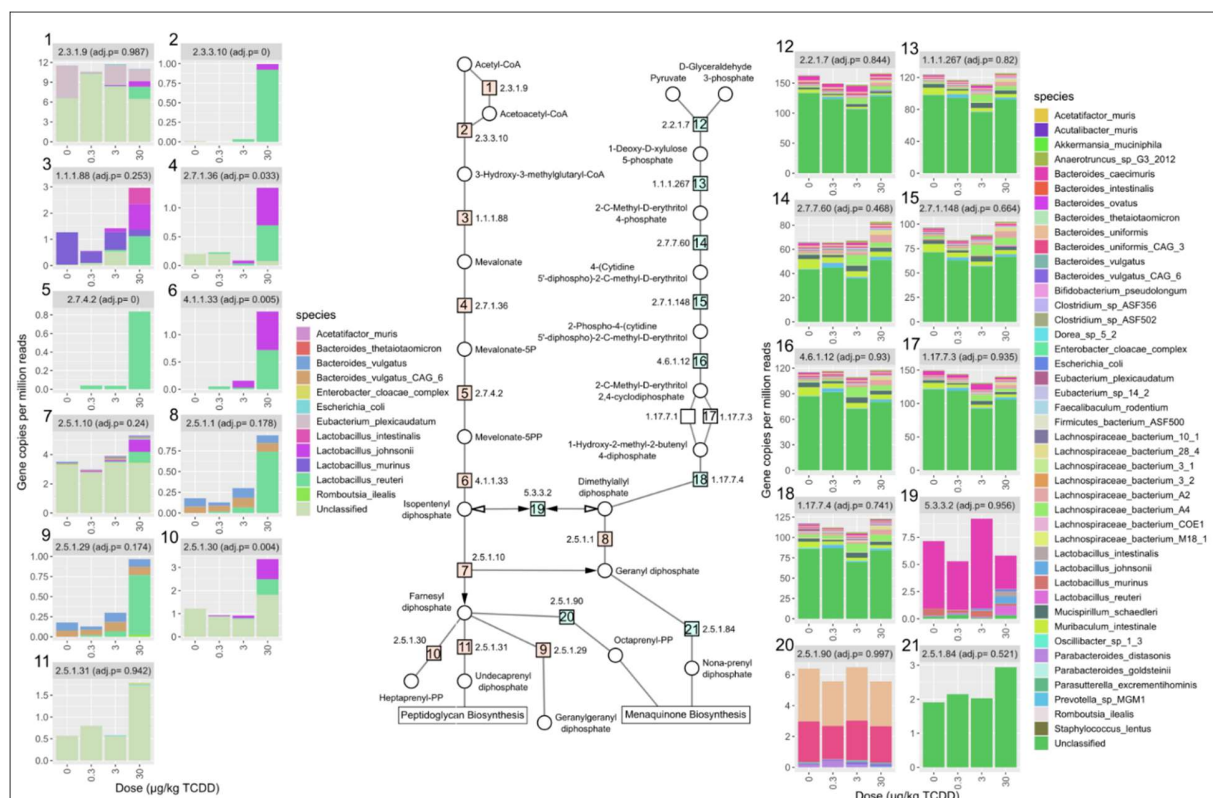

**Figure S1.** Stacked bar plots of annotated EC number mean relative abundance and classified species involved in isoprenoid biosynthesis in cecum of TCDD-exposed mice. Male C57BL6 mice were orally gavaged with sesame oil vehicle or 0.3, 3, or 30 µg/kg TCDD every 4 days for 28 days (n=3). Numbers beside each bar plot correlate with numbered EC number provided in the center schematic of isoprenoid biosynthesis. Adjusted *p*-values (adj. *p*) were determined by the Maaslin2 R package.

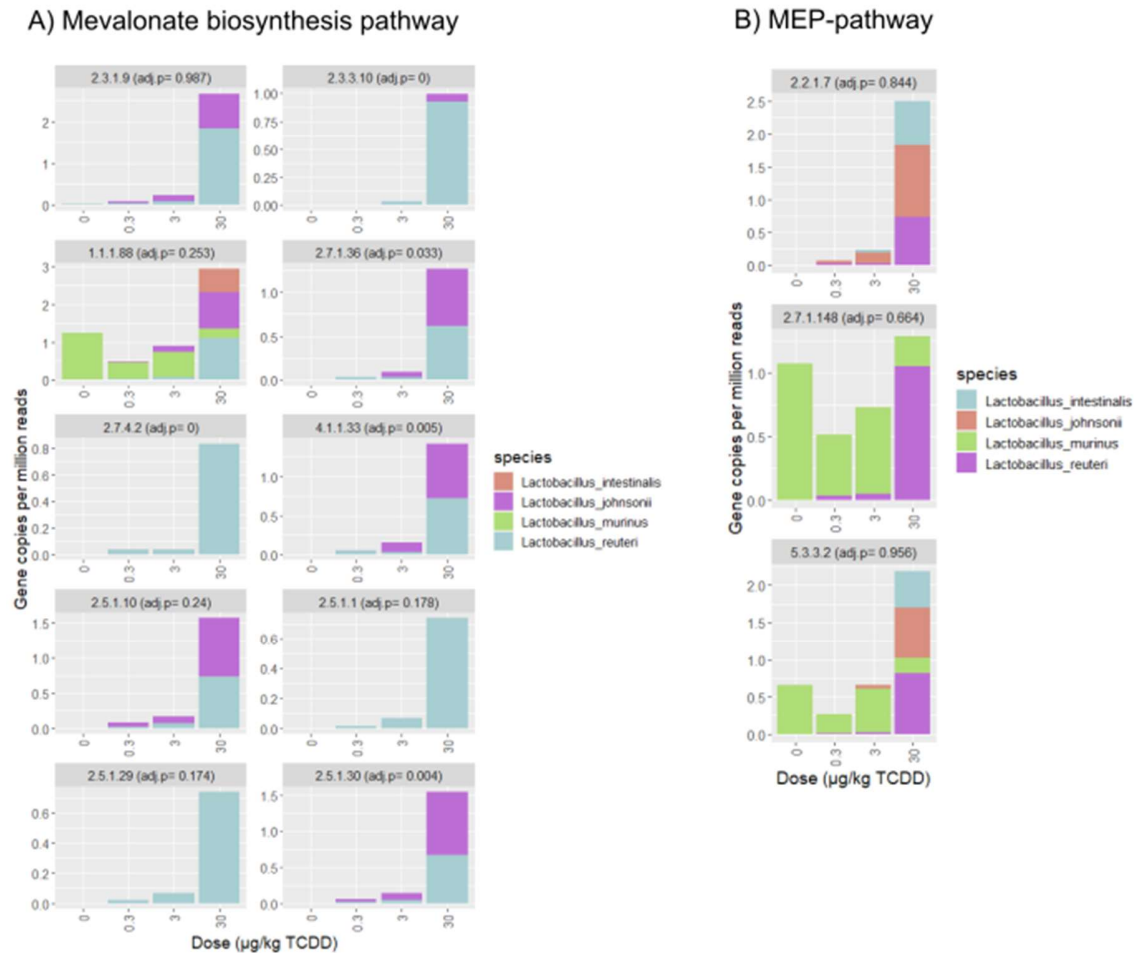

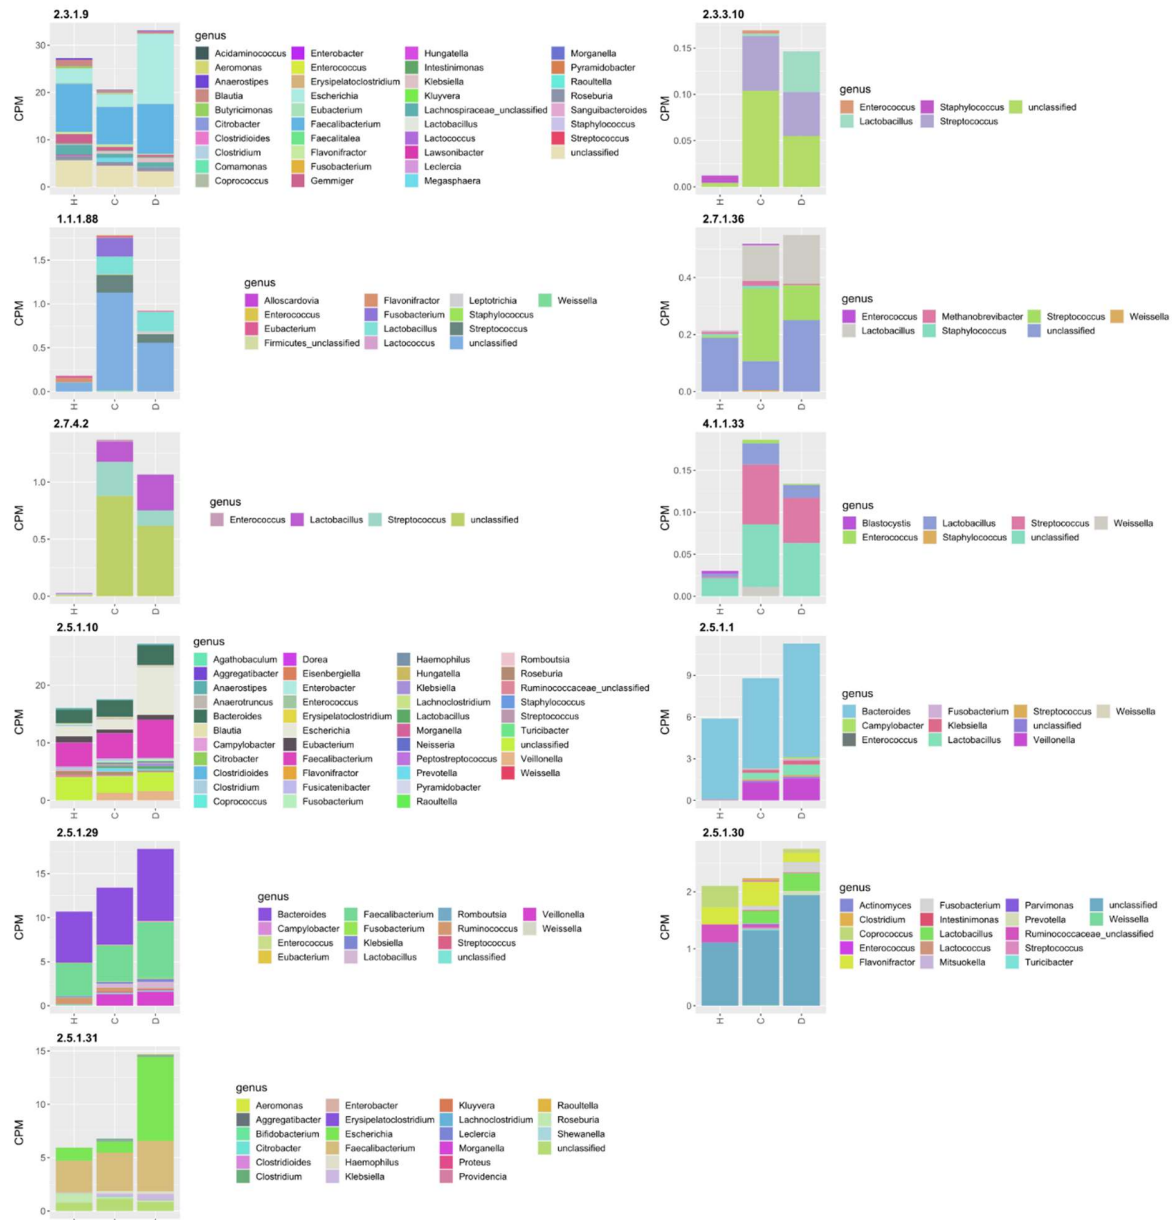

**Figure S3.** Stacked bar plots of annotated EC number mean relative abundance classified to respective genus and involved in mevalonate-dependent isoprenoid biosynthesis in cirrhosis patients. Fecal metagenomic samples were from healthy (H, n=52), compensated (C, n=48) or decompensated (D, n=44) diagnostically defined groups.
