# Supplementary material for: Aryl Hydrocarbon Receptor (AhR) Activation by 2,3,7,8-Tetrachlorodibenzo-p-Dioxin (TCDD) Dose-Dependently Shifts the Gut Microbiome Consistent with the Progression of Non-Alcoholic Fatty Liver Disease
Source: Int J Mol Sci. 2021 Nov 18;22(22):12431. doi: 10.3390/ijms222212431 (PMC8625315; doi:10.3390/ijms222212431)
Supplement: Supplementary file 1 [file ijms-22-12431-s001.zip › IJMS_supplementary_tables-1 - TZ 102721 - RF102721.xlsx]

## Sheet: Table S1
Table S1. Relative abundance of bsh sequences in cecums of TCDD-exposed mice. Sequences were identified using Xander bioinformatics tool among treatment groups. Sequence abudance (n=3 per treatment group) was normalized to total rplB abundance. Mean and Standard deviation of normalized abundance was also denoted as not determined (ND) due to less than 3 replicates detected for the respective GenB…
		Normalized Mean Abundance (bsh/rplB)					Standard Deviation
		Dose (µg/kg TCDD)					Dose (µg/kg TCDD)
GenBank ID	Species	0	0.3	3	30		0	0.3	3	30		adj. p
EGP12391	Lactobacillus johnsonii pf01	0	0	0.000117197	0.000364094		0	0	ND	0.000150405		0.000201834
KRM32771	Lactobacillus intestinalis DSM 6629	0	0	0	0.000161035		0	0	0	1.26879e-05		0.000201834
QDR72673	Lactobacillus reuteri	0	0	0	0.000337137		0	0	0	3.87064e-05		0.000259187
AAS09178	Lactobacillus johnsonii NCC 533	0	0	0.000115542	0.000297812		0	0	ND	0.000141572		0.00101001
EFF64577	Turicibacter sanguinis PC909	0	0	0	0.000368151		0	0	0	0.000132597		0.00244056
EMZ25031	Lactobacillus sp. ASF360	0	0	0	0.000313256		0	0	0	0.000188248		0.00976669
EMZ19208	Lactobacillus sp. ASF360	0	0	0	0.000212032		0	0	0	0.000137159		0.0110694
CDA29171	Eubacterium sp. CAG:156	0	0	0.000167436	0.000473633		0	0	ND	0.000435069		0.0136508
AWZ39229	Lactobacillus murinus	0.000672	0.000275	0.00042	0.000158		4.77e-05	4.79e-05	0.000341	2.17e-05		0.0976

## Sheet: Table S2
Table S2. Uniref90 annotations in murine cecum metagenomic dataset with adjusted p-values (adj. p) < 0.01 is also denoted.
Feature (Uniref90 ID)	coef	stderr	pval	adj. p	N	N.not.zero
UniRef90_A0A1S9AD50	0.141787	0.00450791	2.48018e-11	1.60953e-06	12	3
UniRef90_D4W897	0.140485	0.00442291	2.25032e-11	1.60953e-06	12	3
UniRef90_A0A317GGY3	0.139429	0.00435537	2.08205e-11	1.60953e-06	12	3
UniRef90_D4W2K4	0.139161	0.00422406	1.56659e-11	1.60953e-06	12	3
UniRef90_UPI000B9969A0	0.139012	0.00427096	1.76653e-11	1.60953e-06	12	3
UniRef90_A0A1I0F8B2	0.137873	0.00419948	1.62132e-11	1.60953e-06	12	3
UniRef90_B2GDX6	0.137274	0.0040862	1.29083e-11	1.60953e-06	12	3
UniRef90_D0R380	0.136821	0.00408558	1.33177e-11	1.60953e-06	12	3
UniRef90_A5VJM1	0.143125	0.0046966	3.39201e-11	1.76102e-06	12	3
UniRef90_A0A174E276	0.141788	0.00461444	3.12545e-11	1.76102e-06	12	3
UniRef90_A0A2L2YWN6	1.07138	0.0365205	4.94337e-11	1.77918e-06	12	4
UniRef90_A0A387JN55	0.972618	0.0347265	7.81747e-11	1.77918e-06	12	4
UniRef90_A0A1Y4P6N1	0.703518	0.0251346	7.86728e-11	1.77918e-06	12	4
UniRef90_A0A137PJJ9	0.145385	0.00508427	6.36796e-11	1.77918e-06	12	3
UniRef90_A0A0X1TKY8	0.144299	0.00510392	7.12459e-11	1.77918e-06	12	3
UniRef90_D4W4Z0	0.144224	0.00508116	6.85181e-11	1.77918e-06	12	3
UniRef90_A0A073JRN2	0.144068	0.00512106	7.48212e-11	1.77918e-06	12	3
UniRef90_A0A2S1ERH6	0.14354	0.00512924	7.88209e-11	1.77918e-06	12	3
UniRef90_A0A347T628	0.142477	0.00489552	5.34914e-11	1.77918e-06	12	3
UniRef90_A0A1S9ADN9	0.142397	0.00493245	5.7941e-11	1.77918e-06	12	3
UniRef90_UPI000412BF07	0.140851	0.00473765	4.33251e-11	1.77918e-06	12	3
UniRef90_A0A0X1TKE4	0.140655	0.00481577	5.16413e-11	1.77918e-06	12	3
UniRef90_A0A1S9ADA6	0.139989	0.0046702	3.99484e-11	1.77918e-06	12	3
UniRef90_A0A174NL16	1.04332	0.0383652	1.04604e-10	1.7986e-06	12	4
UniRef90_A0A1V4FJU5	0.836391	0.0304988	9.6282e-11	1.7986e-06	12	4
UniRef90_A0A317GG17	0.684884	0.0250657	9.98242e-11	1.7986e-06	12	4
UniRef90_A0A347T8K7	0.147371	0.0054336	1.07396e-10	1.7986e-06	12	3
UniRef90_R6DEN1	0.147352	0.00539395	1.00029e-10	1.7986e-06	12	3
UniRef90_A0A1S9AEE8	0.147117	0.00531257	8.74409e-11	1.7986e-06	12	3
UniRef90_A0A317GGM2	0.144407	0.00524423	9.24623e-11	1.7986e-06	12	3
UniRef90_A0A347T6Z2	0.142195	0.00521578	1.0206e-10	1.7986e-06	12	3
UniRef90_A0A073JMS7	0.715679	0.0265643	1.14728e-10	1.86133e-06	12	4
UniRef90_A0A0U5JWX2	0.671904	0.0253459	1.34577e-10	2.11721e-06	12	4
UniRef90_D4W4Z6	0.688476	0.02646	1.61779e-10	2.31081e-06	12	4
UniRef90_A0A2S1ENS2	0.64774	0.0249648	1.6635e-10	2.31081e-06	12	4
UniRef90_A5VIJ0	0.637041	0.02493	1.93375e-10	2.31081e-06	12	4
UniRef90_A5VJC3	0.633456	0.0248735	1.99916e-10	2.31081e-06	12	4
UniRef90_Q4JLG5	0.630582	0.0246069	1.88004e-10	2.31081e-06	12	4
UniRef90_B3XPI7	0.620879	0.0243755	1.99578e-10	2.31081e-06	12	4
UniRef90_A0A073JRK6	0.614317	0.0240686	1.95593e-10	2.31081e-06	12	4
UniRef90_F8DRM1	0.611877	0.0242656	2.20444e-10	2.31081e-06	12	4
UniRef90_A0A244CFJ6	0.150686	0.00593179	2.04934e-10	2.31081e-06	12	3
UniRef90_A0A173ZYV2	0.150355	0.00586791	1.88219e-10	2.31081e-06	12	3
UniRef90_A5VKA1	0.150244	0.00592201	2.07549e-10	2.31081e-06	12	3
UniRef90_A0A382YXM4	0.149185	0.00574666	1.65454e-10	2.31081e-06	12	3
UniRef90_A0A0X1TKS4	0.149123	0.00591958	2.2255e-10	2.31081e-06	12	3
UniRef90_A0A174CPB8	0.147098	0.00573399	1.86033e-10	2.31081e-06	12	3
UniRef90_UPI0009C0EEDA	0.146443	0.00564763	1.67379e-10	2.31081e-06	12	3
UniRef90_A0A1C7IG24	0.146411	0.00578462	2.12459e-10	2.31081e-06	12	3
UniRef90_A0A1B1YZE9	0.145987	0.00579387	2.2209e-10	2.31081e-06	12	3
UniRef90_A0A256VGS2	0.665993	0.0270601	2.79968e-10	2.38279e-06	12	4
UniRef90_F8KEA4	0.633478	0.0257353	2.79573e-10	2.38279e-06	12	4
UniRef90_B2GAM0	0.624426	0.0252357	2.65576e-10	2.38279e-06	12	4
UniRef90_A0A073JMM3	0.606151	0.0245634	2.72744e-10	2.38279e-06	12	4
UniRef90_B0MW84	0.150663	0.00609716	2.69145e-10	2.38279e-06	12	3
UniRef90_UPI0006C4FE43	0.149165	0.00598549	2.47525e-10	2.38279e-06	12	3
UniRef90_S5NYC4	0.14671	0.00594994	2.74879e-10	2.38279e-06	12	3
UniRef90_A0A346MQX8	0.146695	0.00594633	2.73517e-10	2.38279e-06	12	3
UniRef90_A0A1C5MQE9	0.146695	0.00594638	2.73538e-10	2.38279e-06	12	3
UniRef90_C7XVT4	0.146466	0.0058632	2.41794e-10	2.38279e-06	12	3
UniRef90_K0YK21	0.146048	0.00585259	2.44287e-10	2.38279e-06	12	3
UniRef90_A0A0I1ZWR6	0.147626	0.00602218	2.91175e-10	2.4382e-06	12	3
UniRef90_N2A3Y7	0.719722	0.0295463	3.09898e-10	2.47935e-06	12	4
UniRef90_A0A1S9ADK6	0.68164	0.0280206	3.14026e-10	2.47935e-06	12	4
UniRef90_E3C5D0	0.632113	0.0260082	3.1684e-10	2.47935e-06	12	4
UniRef90_A0A3A9Y8K2	0.621695	0.02576	3.39546e-10	2.47935e-06	12	4
UniRef90_A5VLY5	0.602347	0.0249867	3.43367e-10	2.47935e-06	12	4
UniRef90_A0A2S1EQK2	0.597819	0.0248024	3.43846e-10	2.47935e-06	12	4
UniRef90_R9WJH2	0.59049	0.0244719	3.40218e-10	2.47935e-06	12	4
UniRef90_K1TY49	0.150051	0.00619149	3.25875e-10	2.47935e-06	12	3
UniRef90_D4W393	0.147623	0.00608653	3.23365e-10	2.47935e-06	12	3
UniRef90_A0A1B3PTT6	0.14612	0.00598571	3.03404e-10	2.47935e-06	12	3
UniRef90_A0A073K344	0.682639	0.0285395	3.70814e-10	2.51993e-06	12	4
UniRef90_A0A073JLS5	0.658976	0.0275351	3.68816e-10	2.51993e-06	12	4
UniRef90_B3XM93	0.653042	0.0273046	3.71156e-10	2.51993e-06	12	4
UniRef90_A0A347T8V7	0.606571	0.0253758	3.73197e-10	2.51993e-06	12	4
UniRef90_A0A073JPR8	0.605961	0.0255126	3.97391e-10	2.51993e-06	12	4
UniRef90_F8DL53	0.59863	0.0252311	4.01627e-10	2.51993e-06	12	4
UniRef90_C2ERH8	0.594989	0.0250855	4.02865e-10	2.51993e-06	12	4
UniRef90_R9WGT5	0.587341	0.0247331	3.98096e-10	2.51993e-06	12	4
UniRef90_C2EVE3	0.153052	0.00642581	3.86541e-10	2.51993e-06	12	3
UniRef90_A0A173XDT2	0.146774	0.00616402	3.87659e-10	2.51993e-06	12	3
UniRef90_A0A316S4N4	0.146699	0.00617916	3.99119e-10	2.51993e-06	12	3
UniRef90_A0A1C2GA98	0.618132	0.0261114	4.10564e-10	2.53751e-06	12	4
UniRef90_A0A0U5JVY9	0.608862	0.0258458	4.30789e-10	2.63119e-06	12	4
UniRef90_A0A0U5KIS0	0.559678	0.0238052	4.39281e-10	2.65185e-06	12	4
UniRef90_A0A256V4J5	0.564414	0.0240571	4.48446e-10	2.67607e-06	12	4
UniRef90_F8DNP6	0.687514	0.0294812	4.75847e-10	2.70324e-06	12	4
UniRef90_A5VJK9	0.609091	0.0260264	4.59613e-10	2.70324e-06	12	4
UniRef90_A0A2N6QV98	0.555575	0.0238397	4.79034e-10	2.70324e-06	12	4
UniRef90_S5NDX6	0.551343	0.0236382	4.75076e-10	2.70324e-06	12	4
UniRef90_M1MM51	0.152599	0.00653423	4.69186e-10	2.70324e-06	12	3
UniRef90_A0A174DEP7	0.154118	0.00664592	5.02839e-10	2.78403e-06	12	3
UniRef90_A0A2S1ETD9	0.149999	0.0064699	5.04076e-10	2.78403e-06	12	3
UniRef90_A0A0U5D5F2	0.632383	0.0273251	5.12965e-10	2.8033e-06	12	4
UniRef90_B3XMN9	0.548497	0.0239691	5.73098e-10	3.0993e-06	12	4
UniRef90_A0A256SLC9	0.623992	0.0273912	5.98992e-10	3.15375e-06	12	4
UniRef90_A5VKC2	0.568067	0.0249464	6.0139e-10	3.15375e-06	12	4
UniRef90_A0A0U5JX98	0.149613	0.00656643	5.98018e-10	3.15375e-06	12	3
UniRef90_S5N3U1	0.154922	0.0068225	6.18232e-10	3.20965e-06	12	3
UniRef90_A0A2T5Q3W2	0.598482	0.0265157	6.56027e-10	3.24368e-06	12	5
UniRef90_A0A2S1EPW8	0.570344	0.0251739	6.32169e-10	3.24368e-06	12	4
UniRef90_S5N506	0.568571	0.0251736	6.51721e-10	3.24368e-06	12	4
UniRef90_F8DQ72	0.560261	0.0247678	6.42013e-10	3.24368e-06	12	4
UniRef90_A0A2A7MF62	0.153481	0.00679302	6.49467e-10	3.24368e-06	12	3
UniRef90_A0A363E916	0.533269	0.0236673	6.67264e-10	3.26812e-06	12	4
UniRef90_A0A347T8N8	0.618459	0.027495	6.78515e-10	3.29217e-06	12	4
UniRef90_D4W7Y2	0.819922	0.0366554	7.16734e-10	3.30444e-06	12	4
UniRef90_A0A0U5JPY4	0.576906	0.0257498	7.05541e-10	3.30444e-06	12	4
UniRef90_A0A0U5JM33	0.556123	0.0249086	7.30044e-10	3.30444e-06	12	4
UniRef90_A4L2S1	0.547404	0.0245152	7.29199e-10	3.30444e-06	12	4
UniRef90_F8DQZ3	0.545055	0.0242759	6.90782e-10	3.30444e-06	12	4
UniRef90_B3XPX1	0.540931	0.0241884	7.1836e-10	3.30444e-06	12	4
UniRef90_A0A0R1VDT2	0.538817	0.02414	7.31963e-10	3.30444e-06	12	4
UniRef90_A0A174RSV0	0.152617	0.00683075	7.24914e-10	3.30444e-06	12	3
UniRef90_A0A2R7DT87	0.564577	0.0253961	7.61477e-10	3.37891e-06	12	4
UniRef90_A0A174DTP9	0.154195	0.00693514	7.60457e-10	3.37891e-06	12	3
UniRef90_F8KE56	0.547428	0.0247746	8.08234e-10	3.556e-06	12	4
UniRef90_A0A2S1ETX1	0.601679	0.0272941	8.27153e-10	3.57858e-06	12	5
UniRef90_A0A0U5F3G0	0.764493	0.0346609	8.22729e-10	3.57858e-06	12	4
UniRef90_D0R3Z7	0.530628	0.0241949	8.69905e-10	3.70819e-06	12	4
UniRef90_A0A3A9HVV2	0.14938	0.00681243	8.71396e-10	3.70819e-06	12	3
UniRef90_A5VJ37	0.596904	0.0273598	9.15773e-10	3.73122e-06	12	4
UniRef90_A0A0U5JSU0	0.562861	0.0258045	9.1758e-10	3.73122e-06	12	4
UniRef90_S5NYZ4	0.543131	0.0249065	9.19929e-10	3.73122e-06	12	4
UniRef90_L1QPR3	0.530329	0.0242803	9.05499e-10	3.73122e-06	12	4
UniRef90_N2ADZ9	0.156649	0.00716566	8.97732e-10	3.73122e-06	12	3
UniRef90_A0A174NU28	0.154163	0.00704211	8.85573e-10	3.73122e-06	12	3
UniRef90_Q4JLE7	0.156139	0.00716804	9.29978e-10	3.74274e-06	12	3
UniRef90_A5VKR6	0.550403	0.025359	9.63394e-10	3.7891e-06	12	4
UniRef90_S5NBE0	0.548571	0.0252689	9.6126e-10	3.7891e-06	12	4
UniRef90_N2A6L6	0.515703	0.0237457	9.57597e-10	3.7891e-06	12	4
UniRef90_S5N5N5	0.518007	0.0239899	1.01341e-09	3.91358e-06	12	4
UniRef90_F8DR28	0.154326	0.00715018	1.01766e-09	3.91358e-06	12	3
UniRef90_S5NPT0	0.151842	0.00703331	1.01513e-09	3.91358e-06	12	3
UniRef90_A0A2S1ER99	0.549741	0.0256107	1.07395e-09	3.93128e-06	12	4
UniRef90_A0A0S4NQ69	0.543692	0.0252863	1.05638e-09	3.93128e-06	12	4
UniRef90_A0A0U5JJI7	0.524298	0.0244241	1.07341e-09	3.93128e-06	12	4
UniRef90_A0A317GKD5	0.524071	0.0243989	1.06711e-09	3.93128e-06	12	4
UniRef90_A0A0U5JN97	0.516792	0.0240787	1.07527e-09	3.93128e-06	12	4
UniRef90_A0A2T5Q1C9	0.155419	0.00723814	1.07054e-09	3.93128e-06	12	3
UniRef90_A0A173XKS5	0.15149	0.00704349	1.05332e-09	3.93128e-06	12	3
UniRef90_F8KDI6	0.512052	0.0239441	1.114e-09	4.04442e-06	12	4
UniRef90_A0A1Y2V6D4	0.5343	0.0250422	1.13948e-09	4.07985e-06	12	4
UniRef90_UPI0006BF8B22	0.147976	0.00693081	1.13195e-09	4.07985e-06	12	3
UniRef90_A0A0U5K0K9	0.54978	0.025797	1.15223e-09	4.08726e-06	12	4
UniRef90_F8DQH6	0.154713	0.00726275	1.15729e-09	4.08726e-06	12	3
UniRef90_A0A073JMW5	0.636724	0.0299237	1.17015e-09	4.10475e-06	12	5
UniRef90_F8KBG0	0.553082	0.0260186	1.18158e-09	4.11702e-06	12	4
UniRef90_A0A2S1EPW9	0.551606	0.0260454	1.22523e-09	4.14282e-06	12	4
UniRef90_A0A256V3T9	0.52514	0.0247642	1.21008e-09	4.14282e-06	12	4
UniRef90_F8KCI2	0.523351	0.0246893	1.21463e-09	4.14282e-06	12	4
UniRef90_S5NEN2	0.157991	0.00746219	1.22888e-09	4.14282e-06	12	3
UniRef90_B3XL49	0.156041	0.00736398	1.21899e-09	4.14282e-06	12	3
UniRef90_Q4JLJ0	0.553118	0.0262516	1.28864e-09	4.2343e-06	12	4
UniRef90_A0A098QXH8	0.546929	0.0259349	1.27751e-09	4.2343e-06	12	4
UniRef90_A0A2S1ER69	0.523664	0.0248093	1.26629e-09	4.2343e-06	12	4
UniRef90_A0A0U5K5E6	0.507938	0.024106	1.28796e-09	4.2343e-06	12	4
UniRef90_A0A0U5F4P7	0.513867	0.0244854	1.33961e-09	4.32076e-06	12	4
UniRef90_A5VHU2	0.492952	0.0235037	1.34796e-09	4.32076e-06	12	4
UniRef90_A0A120IDL2	0.158368	0.00754201	1.33248e-09	4.32076e-06	12	3
UniRef90_A0A1V4FI51	0.151503	0.00722375	1.34824e-09	4.32076e-06	12	3
UniRef90_F8DRI6	0.554166	0.0264559	1.36477e-09	4.34689e-06	12	4
UniRef90_F8DRB0	0.574201	0.0274565	1.38648e-09	4.36251e-06	12	4
UniRef90_UPI000C1C0C4D	0.158171	0.00756228	1.38469e-09	4.36251e-06	12	3
UniRef90_A0A2S1EU48	0.522893	0.0251131	1.44735e-09	4.49948e-06	12	4
UniRef90_F8DL96	0.508941	0.0244283	1.43883e-09	4.49948e-06	12	4
UniRef90_A0A1Y2UYA3	0.155208	0.00746378	1.46564e-09	4.52922e-06	12	3
UniRef90_B3XNW0	0.576569	0.0279147	1.56603e-09	4.69958e-06	12	4
UniRef90_F8KFR7	0.515993	0.0249668	1.55677e-09	4.69958e-06	12	4
UniRef90_A0A0U5FB42	0.490892	0.0237638	1.56416e-09	4.69958e-06	12	4
UniRef90_A0A329TTI5	0.157793	0.00762669	1.54031e-09	4.69958e-06	12	3
UniRef90_A0A174S076	0.157431	0.00760447	1.53099e-09	4.69958e-06	12	3
UniRef90_Q74J85	0.554991	0.0269232	1.5966e-09	4.7638e-06	12	4
UniRef90_F8DQW9	0.562029	0.0273133	1.62471e-09	4.78016e-06	12	4
UniRef90_N2A3D9	0.543795	0.0264099	1.61437e-09	4.78016e-06	12	4
UniRef90_B2G6F6	0.484592	0.0235574	1.62971e-09	4.78016e-06	12	4
UniRef90_D4W9A1	0.148523	0.00722695	1.64483e-09	4.79741e-06	12	3
UniRef90_B3XRW9	0.500525	0.0243694	1.65442e-09	4.79844e-06	12	4
UniRef90_A0A350WYT0	0.155261	0.00756411	1.66475e-09	4.80156e-06	12	3
UniRef90_F8KBH7	0.851325	0.0418286	1.8088e-09	5.02989e-06	12	4
UniRef90_Q38UR1	0.598577	0.0294297	1.82058e-09	5.02989e-06	12	4
UniRef90_Q4JLP7	0.556845	0.0273114	1.77774e-09	5.02989e-06	12	4
UniRef90_F8DKS7	0.542173	0.0266773	1.83448e-09	5.02989e-06	12	4
UniRef90_S5NPW7	0.519204	0.0254698	1.78084e-09	5.02989e-06	12	4
UniRef90_A0A2R7DXB0	0.512774	0.0252666	1.86017e-09	5.02989e-06	12	4
UniRef90_R9WGU3	0.494417	0.0242911	1.80785e-09	5.02989e-06	12	4
UniRef90_C8P9H7	0.492488	0.0242542	1.85057e-09	5.02989e-06	12	4
UniRef90_A0A081NR07	0.490448	0.0241519	1.84919e-09	5.02989e-06	12	4
UniRef90_A0A0U5K1Z1	0.480095	0.0235438	1.77539e-09	5.02989e-06	12	4
UniRef90_A0A173YC03	0.158727	0.00780707	1.8276e-09	5.02989e-06	12	3
UniRef90_A0A0X1TJY9	0.153033	0.00752641	1.82622e-09	5.02989e-06	12	3
UniRef90_A0A1C1ZNQ6	0.599255	0.0296209	1.91829e-09	5.05698e-06	12	4
UniRef90_A0A317GKI9	0.588793	0.029102	1.91712e-09	5.05698e-06	12	4
UniRef90_A0A0S4NQX8	0.509394	0.0252318	1.95786e-09	5.05698e-06	12	4
UniRef90_S5NDW1	0.48283	0.0238319	1.89157e-09	5.05698e-06	12	4
UniRef90_R9WE58	0.482479	0.023898	1.95744e-09	5.05698e-06	12	4
UniRef90_R9WHG8	0.476543	0.0235919	1.9476e-09	5.05698e-06	12	4
UniRef90_A0A174C757	0.157695	0.00777921	1.88109e-09	5.05698e-06	12	3
UniRef90_R9WHN5	0.157367	0.00778301	1.92902e-09	5.05698e-06	12	3
UniRef90_A0A143PZU6	0.14868	0.00735647	1.93695e-09	5.05698e-06	12	3
UniRef90_B2GBB7	0.549024	0.0272622	2.00588e-09	5.0907e-06	12	4
UniRef90_A0A244CDR2	0.502681	0.0249562	2.00215e-09	5.0907e-06	12	4
UniRef90_A0A2S1EPQ1	0.501278	0.0248968	2.01013e-09	5.0907e-06	12	4
UniRef90_F8DM39	0.475026	0.0235786	1.99824e-09	5.0907e-06	12	4
UniRef90_R9WHF6	0.153884	0.0076486	2.02492e-09	5.10325e-06	12	3
UniRef90_A0A174UEM8	0.155448	0.00773355	2.04341e-09	5.12498e-06	12	3
UniRef90_A0A1S9AAC8	0.485016	0.0241806	2.0861e-09	5.20688e-06	12	4
UniRef90_A0A2S1ERH1	0.626128	0.0313091	2.14788e-09	5.20916e-06	12	4
UniRef90_A0A0R2DC61	0.557822	0.0279059	2.15725e-09	5.20916e-06	12	4
UniRef90_B3XN50	0.551965	0.0276103	2.15522e-09	5.20916e-06	12	4
UniRef90_A0A0U5FB39	0.523445	0.0261667	2.14162e-09	5.20916e-06	12	4
UniRef90_S5NMN5	0.494089	0.0247159	2.15577e-09	5.20916e-06	12	4
UniRef90_A0A0X1TJU0	0.159444	0.00796764	2.13407e-09	5.20916e-06	12	3
UniRef90_F8DS25	0.153331	0.00764882	2.09804e-09	5.20916e-06	12	3
UniRef90_A0A317GHJ4	0.472062	0.0236338	2.1735e-09	5.2241e-06	12	4
UniRef90_A0A0R1XPD1	0.627096	0.0314549	2.21399e-09	5.29691e-06	12	4
UniRef90_A5VHN0	0.718435	0.0361342	2.27343e-09	5.41416e-06	12	5
UniRef90_A0A0U5JS74	0.466525	0.0234989	2.30645e-09	5.46773e-06	12	4
UniRef90_UPI0006DC6DEC	0.160098	0.0080747	2.33607e-09	5.51277e-06	12	3
UniRef90_A5VIG6	0.499441	0.0252994	2.43736e-09	5.72576e-06	12	4
UniRef90_A0A120DL36	1.14053	0.0578873	2.48446e-09	5.81013e-06	12	4
UniRef90_A0A317GSE3	0.535602	0.027223	2.51922e-09	5.82489e-06	12	4
UniRef90_B3XL66	0.51508	0.0261669	2.50697e-09	5.82489e-06	12	4
UniRef90_B3XQH5	0.476769	0.0242379	2.52444e-09	5.82489e-06	12	4
UniRef90_A0A363EAT3	0.479762	0.0244159	2.55067e-09	5.85938e-06	12	4
UniRef90_B3XNW1	0.465244	0.023725	2.60165e-09	5.95018e-06	12	4
UniRef90_A0A174UUN8	0.680652	0.0348166	2.68099e-09	5.97373e-06	12	4
UniRef90_B2GAL4	0.507788	0.0259627	2.66928e-09	5.97373e-06	12	4
UniRef90_F8DRF7	0.503393	0.0257217	2.6529e-09	5.97373e-06	12	4
UniRef90_A0A317GLI3	0.501993	0.0256731	2.67614e-09	5.97373e-06	12	4
UniRef90_A0A137PPA8	0.470889	0.0240677	2.66025e-09	5.97373e-06	12	4
UniRef90_A0A0X1TJW0	0.160471	0.00820612	2.67377e-09	5.97373e-06	12	3
UniRef90_A0A317GG54	0.155904	0.00798109	2.70173e-09	5.99421e-06	12	3
UniRef90_A0A317GP24	0.150846	0.00774122	2.76768e-09	6.1144e-06	12	3
UniRef90_B3XM42	0.479756	0.0246535	2.80414e-09	6.16871e-06	12	4
UniRef90_A0A073JLA9	0.159878	0.00822226	2.82587e-09	6.19028e-06	12	3
UniRef90_A5VK09	0.527408	0.0271822	2.88592e-09	6.29525e-06	12	4
UniRef90_A0A143Q217	0.526511	0.0271585	2.90937e-09	6.31986e-06	12	4
UniRef90_A5VKZ3	0.483101	0.0249885	2.9893e-09	6.45803e-06	12	4
UniRef90_A0A244CE91	0.160596	0.0083093	2.99786e-09	6.45803e-06	12	3
UniRef90_Q74I51	0.549598	0.0284662	3.0286e-09	6.47278e-06	12	5
UniRef90_A5VKE8	0.610613	0.0316275	3.02964e-09	6.47278e-06	12	4
UniRef90_A0A0U5JWP8	0.51114	0.0265315	3.09304e-09	6.58115e-06	12	4
UniRef90_A0A0U5KJ76	0.460848	0.0239518	3.13222e-09	6.61831e-06	12	4
UniRef90_A0A174TXJ1	0.161066	0.00837219	3.136e-09	6.61831e-06	12	3
UniRef90_S5NY75	0.555281	0.02897	3.25081e-09	6.74821e-06	12	4
UniRef90_A5VJ48	0.506048	0.026422	3.27554e-09	6.74821e-06	12	4
UniRef90_A0A1X8V7E3	0.484419	0.0252448	3.21558e-09	6.74821e-06	12	4
UniRef90_F8DRV8	0.465916	0.0243014	3.24267e-09	6.74821e-06	12	4
UniRef90_B3XRB6	0.161545	0.00843372	3.27216e-09	6.74821e-06	12	3
UniRef90_A0A2S1ESB4	0.155404	0.00810501	3.24025e-09	6.74821e-06	12	3
UniRef90_A0A358VKF7	0.149349	0.00781571	3.34945e-09	6.8732e-06	12	3
UniRef90_A0A317G8P3	0.748467	0.0392189	3.39163e-09	6.93236e-06	12	4
UniRef90_A0A0G2Y700	0.152812	0.00801238	3.41319e-09	6.94908e-06	12	3
UniRef90_S5N4V2	0.540957	0.0283818	3.43405e-09	6.96423e-06	12	4
UniRef90_A5VJ31	0.45346	0.0238461	3.5122e-09	7.09501e-06	12	4
UniRef90_A0A0U5K5P4	0.753418	0.0396637	3.55013e-09	7.14382e-06	12	4
UniRef90_A0A2S1EQW8	0.446399	0.0235241	3.58486e-09	7.18586e-06	12	4
UniRef90_A0A073K0Q4	0.52918	0.0279402	3.65277e-09	7.29383e-06	12	4
UniRef90_E3C7E7	0.50662	0.0267603	3.66783e-09	7.29583e-06	12	4
UniRef90_F8DRG6	0.543432	0.0287297	3.69896e-09	7.32967e-06	12	4
UniRef90_F8DRG1	0.443814	0.0234724	3.71312e-09	7.32976e-06	12	4
UniRef90_A0A376VXJ2	0.450747	0.0238484	3.72725e-09	7.32977e-06	12	4
UniRef90_F8KGN2	0.163189	0.00864105	3.75666e-09	7.35974e-06	12	3
UniRef90_F8DQX9	0.445609	0.0236077	3.77565e-09	7.3641e-06	12	4
UniRef90_UPI00070C9C31	0.155986	0.00826653	3.78726e-09	7.3641e-06	12	3
UniRef90_A5VKS5	0.150022	0.00795527	3.80972e-09	7.38014e-06	12	3
UniRef90_A0A073JRM8	0.744539	0.0395327	3.85869e-09	7.43515e-06	12	4
UniRef90_A0A073JNR4	0.70903	0.0376553	3.86676e-09	7.43515e-06	12	4
UniRef90_A0A098QRE3	0.518278	0.0275407	3.88858e-09	7.44952e-06	12	4
UniRef90_A0A0U5JVR5	0.4963	0.0264355	3.97963e-09	7.56809e-06	12	4
UniRef90_B3XQZ0	0.478249	0.0254706	3.97436e-09	7.56809e-06	12	4
UniRef90_A0A2S1ERE2	0.507006	0.0270284	4.01224e-09	7.60225e-06	12	4
UniRef90_A5VKQ1	0.479897	0.0256247	4.07617e-09	7.6953e-06	12	4
UniRef90_A5VME2	0.496995	0.0265685	4.12252e-09	7.75461e-06	12	4
UniRef90_A0A0U5JQB9	0.780902	0.0417647	4.14083e-09	7.76092e-06	12	5
UniRef90_A0A143Q3F6	0.459014	0.0246378	4.28849e-09	8.00877e-06	12	4
UniRef90_A0A0U5F335	0.503319	0.0270953	4.41292e-09	8.03554e-06	12	4
UniRef90_A5VJ12	0.494167	0.0265719	4.36363e-09	8.03554e-06	12	4
UniRef90_A0A0U5JKQ5	0.482194	0.0259318	4.36971e-09	8.03554e-06	12	4
UniRef90_A0A2S1EQR0	0.461324	0.0248248	4.39614e-09	8.03554e-06	12	4
UniRef90_F8DNS0	0.438991	0.0236398	4.42665e-09	8.03554e-06	12	4
UniRef90_A0A0R1IB93	0.161036	0.00867055	4.42019e-09	8.03554e-06	12	3
UniRef90_A0A0X1TLF7	0.15078	0.00810935	4.3729e-09	8.03554e-06	12	3
UniRef90_A0A174R5Q8	0.149125	0.00802487	4.39671e-09	8.03554e-06	12	3
UniRef90_C2E7M6	0.517147	0.0278946	4.49841e-09	8.1091e-06	12	4
UniRef90_A0A317GFV8	0.475695	0.0256556	4.49322e-09	8.1091e-06	12	4
UniRef90_A0A0U5JPE3	0.487087	0.0262944	4.53402e-09	8.14502e-06	12	4
UniRef90_A0A2R7DPJ4	0.529633	0.0286583	4.63882e-09	8.25745e-06	12	4
UniRef90_A0A317GF97	0.525372	0.028446	4.66781e-09	8.25745e-06	12	4
UniRef90_A0A2S1ESK5	0.514803	0.0278513	4.63138e-09	8.25745e-06	12	4
UniRef90_Q74J88	0.455316	0.0246504	4.66337e-09	8.25745e-06	12	4
UniRef90_A0A0R2B8D5	0.448135	0.0242684	4.67614e-09	8.25745e-06	12	4
UniRef90_A0A158SKV9	0.484918	0.0262764	4.70397e-09	8.2607e-06	12	4
UniRef90_A0A0U5JMH1	0.476089	0.0258067	4.71935e-09	8.2607e-06	12	4
UniRef90_C2E3C4	0.162825	0.00882726	4.72571e-09	8.2607e-06	12	3
UniRef90_F8DM07	0.491079	0.0266437	4.76185e-09	8.29594e-06	12	4
UniRef90_A0A2S1ERV9	0.465967	0.0253079	4.81106e-09	8.35365e-06	12	4
UniRef90_A0A244CDN1	0.152368	0.0082845	4.86218e-09	8.41427e-06	12	3
UniRef90_A0A317GBP8	0.679804	0.037062	4.9916e-09	8.60954e-06	12	4
UniRef90_A0A1C1ZJF4	0.494547	0.0269857	5.03445e-09	8.65468e-06	12	4
UniRef90_A0A1C2G638	0.527378	0.0288087	5.08831e-09	8.7184e-06	12	4
UniRef90_A0A073JMI4	0.43421	0.0237496	5.15209e-09	8.79866e-06	12	4
UniRef90_Q0GLA5	0.433685	0.0237306	5.17252e-09	8.80459e-06	12	4
UniRef90_N2AHH2	0.47903	0.0262526	5.25144e-09	8.9097e-06	12	4
UniRef90_B2G823	0.524585	0.0287852	5.31575e-09	8.98944e-06	12	4
UniRef90_A0A081NS80	0.447609	0.0245776	5.35009e-09	9.01814e-06	12	4
UniRef90_C8P635	0.479319	0.0263369	5.38628e-09	9.02981e-06	12	4
UniRef90_F8DNW9	0.457039	0.0251154	5.3918e-09	9.02981e-06	12	4
UniRef90_R9WGM9	0.540812	0.0297393	5.42798e-09	9.06117e-06	12	4
UniRef90_A0A0U5KQ37	0.555704	0.0305786	5.46339e-09	9.06568e-06	12	4
UniRef90_Q74L30	0.504492	0.0277799	5.50053e-09	9.06568e-06	12	4
UniRef90_A0A0R1Y162	0.452123	0.0248945	5.49681e-09	9.06568e-06	12	4
UniRef90_A0A0R1XYC2	0.445126	0.0244997	5.47605e-09	9.06568e-06	12	4
UniRef90_A5VHU0	0.535141	0.0295168	5.59044e-09	9.09178e-06	12	4
UniRef90_A0A2R7DUI5	0.521782	0.0287999	5.62825e-09	9.09178e-06	12	4
UniRef90_A5VI25	0.506221	0.0279302	5.60699e-09	9.09178e-06	12	4
UniRef90_F8DRS0	0.442173	0.0244106	5.63895e-09	9.09178e-06	12	4
UniRef90_F8DPA7	0.435838	0.0240337	5.57711e-09	9.09178e-06	12	4
UniRef90_Q2F7P0	0.159694	0.00880011	5.54037e-09	9.09178e-06	12	3
UniRef90_A0A173TES6	0.156647	0.00863707	5.57094e-09	9.09178e-06	12	3
UniRef90_UPI00047D8C98	0.157985	0.00872455	5.65663e-09	9.09204e-06	12	3
UniRef90_A5VKN2	0.696788	0.0385202	5.7154e-09	9.15815e-06	12	4
UniRef90_B3XLG3	0.158338	0.00876752	5.80607e-09	9.27481e-06	12	3
UniRef90_A0A0U5K2S4	0.492461	0.027314	5.90072e-09	9.39709e-06	12	4
UniRef90_F8DMR2	0.612696	0.0340588	6.03064e-09	9.5626e-06	12	4
UniRef90_A0A0U5JMM6	0.491816	0.0273454	6.0437e-09	9.5626e-06	12	4
UniRef90_F8KGM7	0.467599	0.0260061	6.0599e-09	9.5626e-06	12	4
UniRef90_A0A1C1ZNS9	0.544068	0.0302744	6.08993e-09	9.56619e-06	12	4
UniRef90_A0A1C2G9J1	0.479942	0.0267102	6.09903e-09	9.56619e-06	12	4
UniRef90_Q0GL73	0.484843	0.0270462	6.23954e-09	9.7571e-06	12	4
UniRef90_A0A143Q3Q1	0.43903	0.0245382	6.35837e-09	9.88339e-06	12	4
UniRef90_A0A2S1EQA0	0.433723	0.0242401	6.35453e-09	9.88339e-06	12	4
UniRef90_A0A0R1U4R0	0.555727	0.0311186	6.47473e-09	9.97465e-06	12	4
UniRef90_A0A0U5KJD9	0.522091	0.0292242	6.45119e-09	9.97465e-06	12	4
UniRef90_F8DM10	0.472697	0.0264669	6.46919e-09	9.97465e-06	12	4
UniRef90_R9WFN3	0.507305	0.0284387	6.54495e-09	1.00233e-05	12	4
UniRef90_A0A173Z5J6	0.151663	0.00850182	6.54394e-09	1.00233e-05	12	3
UniRef90_A0A081NQ44	0.533254	0.0299136	6.58805e-09	1.00597e-05	12	4
UniRef90_A0A173XGT5	0.154112	0.00865921	6.69336e-09	1.01905e-05	12	3
UniRef90_S5NBW5	0.429166	0.0241287	6.73333e-09	1.02214e-05	12	4
UniRef90_N2A2T1	0.634165	0.0356926	6.80416e-09	1.02988e-05	12	4
UniRef90_Q562J3	0.668749	0.037668	6.85508e-09	1.03457e-05	12	5
UniRef90_A0A0R1XP44	0.469005	0.0264838	7.02477e-09	1.05711e-05	12	4
UniRef90_F4AGP6	0.151345	0.00854898	7.04766e-09	1.05749e-05	12	3
UniRef90_A0A2S1ETD8	0.164032	0.00927652	7.12816e-09	1.06648e-05	12	3
UniRef90_N2A089	0.566794	0.0320742	7.17227e-09	1.07e-05	12	4
UniRef90_A0A0U5JMR0	0.538733	0.030501	7.20595e-09	1.0703e-05	12	4
UniRef90_F8KEQ9	0.428371	0.024256	7.21553e-09	1.0703e-05	12	4
UniRef90_A0A0R1XYE6	0.635527	0.0360165	7.27518e-09	1.07608e-05	12	4
UniRef90_A0A109RMB5	0.544704	0.030879	7.29716e-09	1.07626e-05	12	4
UniRef90_R9WJM6	0.418354	0.0237277	7.33118e-09	1.07822e-05	12	4
UniRef90_N2AT67	0.714654	0.0405858	7.42488e-09	1.08279e-05	12	4
UniRef90_A0A1V4FIN9	0.440814	0.0250311	7.41589e-09	1.08279e-05	12	4
UniRef90_A0A1B3PVF5	0.153085	0.00869255	7.41416e-09	1.08279e-05	12	3
UniRef90_D0R5M8	0.158222	0.00900071	7.54737e-09	1.09757e-05	12	3
UniRef90_N2AKX4	0.675217	0.0384451	7.61311e-09	1.10097e-05	12	4
UniRef90_F8DL66	0.155336	0.00884229	7.59545e-09	1.10097e-05	12	3
UniRef90_A0A1Y3U8C6	0.522938	0.029823	7.73376e-09	1.10305e-05	12	4
UniRef90_S5N859	0.482776	0.0275138	7.68255e-09	1.10305e-05	12	4
UniRef90_C7XX04	0.439338	0.025045	7.703e-09	1.10305e-05	12	4
UniRef90_A0A317GG63	0.415207	0.0236778	7.72951e-09	1.10305e-05	12	4
UniRef90_A0A256VC85	0.152813	0.00871328	7.71988e-09	1.10305e-05	12	3
UniRef90_A0A0R1XNF6	0.496631	0.0283379	7.774e-09	1.10575e-05	12	4
UniRef90_A0A0R1W8G7	0.474181	0.0270913	7.87069e-09	1.11645e-05	12	4
UniRef90_A0A1V4FLC1	0.417582	0.0238674	7.9019e-09	1.11782e-05	12	4
UniRef90_F8DPB7	0.487682	0.0279135	8.01127e-09	1.12107e-05	12	4
UniRef90_R9WKZ2	0.463739	0.0265421	8.0083e-09	1.12107e-05	12	4
UniRef90_A0A0U5JLA2	0.455669	0.0260731	7.98704e-09	1.12107e-05	12	4
UniRef90_A0A0X1TLI4	0.150582	0.00861809	8.00438e-09	1.12107e-05	12	3
UniRef90_A0A0R1P3X0	0.467544	0.0267935	8.10657e-09	1.13136e-05	12	4
UniRef90_A0A081NS67	0.734539	0.0421641	8.23826e-09	1.14621e-05	12	5
UniRef90_A0A347TAM7	0.472496	0.0271361	8.27923e-09	1.14621e-05	12	4
UniRef90_A0A0R1WBZ0	0.445583	0.0255846	8.26095e-09	1.14621e-05	12	4
UniRef90_A0A0U5JS94	0.502049	0.0289148	8.50893e-09	1.17291e-05	12	4
UniRef90_A0A173WEQ7	0.166428	0.00958613	8.51726e-09	1.17291e-05	12	3
UniRef90_N2AM37	0.770839	0.0444536	8.61794e-09	1.17562e-05	12	4
UniRef90_F8DR25	0.499706	0.0288201	8.6252e-09	1.17562e-05	12	4
UniRef90_A0A2S1EST0	0.443011	0.0255517	8.62991e-09	1.17562e-05	12	4
UniRef90_D4W2R2	0.163271	0.00941521	8.61354e-09	1.17562e-05	12	3
UniRef90_A0A1X8VB66	0.158584	0.00914892	8.65019e-09	1.17562e-05	12	3
UniRef90_F8KCI4	0.684865	0.0395868	8.81301e-09	1.18842e-05	12	4
UniRef90_A0A350X034	0.162096	0.00936736	8.79301e-09	1.18842e-05	12	3
UniRef90_A0A0X1TJ22	0.153669	0.00887835	8.77385e-09	1.18842e-05	12	3
UniRef90_A0A2R7DQJ0	0.585269	0.0339496	9.12012e-09	1.22665e-05	12	4
UniRef90_F8DRC7	0.567659	0.0329498	9.17879e-09	1.23135e-05	12	5
UniRef90_A5VIE8	0.670398	0.0389366	9.23209e-09	1.23339e-05	12	5
UniRef90_A0A2R7DLB1	0.48509	0.0281769	9.24149e-09	1.23339e-05	12	4
UniRef90_A0A1C1Z7D5	0.425156	0.0247303	9.36859e-09	1.24714e-05	12	4
UniRef90_A0A073JMU8	0.633179	0.0368494	9.41505e-09	1.25012e-05	12	5
UniRef90_UPI000C1B6EF1	0.502813	0.0292817	9.47556e-09	1.25495e-05	12	4
UniRef90_A0A0R1WJN1	0.639606	0.0373098	9.62922e-09	1.26644e-05	12	4
UniRef90_A0A317GFM9	0.425721	0.024835	9.63551e-09	1.26644e-05	12	4
UniRef90_S5NE66	0.158585	0.0092469	9.59136e-09	1.26644e-05	12	3
UniRef90_A0A0U5D900	0.427432	0.0249486	9.68729e-09	1.26683e-05	12	4
UniRef90_A0A174UYQ2	0.158366	0.00924151	9.66594e-09	1.26683e-05	12	3
UniRef90_A0A0U5JWU0	0.679153	0.039672	9.76032e-09	1.27317e-05	12	6
UniRef90_A0A317GB46	0.47066	0.0275113	9.82302e-09	1.27814e-05	12	4
UniRef90_A0A2S1EN75	0.471675	0.0276133	9.97151e-09	1.29422e-05	12	4
UniRef90_A0A1C1ZPI4	0.472769	0.0276849	9.99793e-09	1.29441e-05	12	4
UniRef90_F8DRM0	0.432373	0.0253338	1.00533e-08	1.29834e-05	12	4
UniRef90_A0A285SPF4	0.167739	0.00983689	1.01394e-08	1.30621e-05	12	3
UniRef90_A0A1V4FJY8	0.491649	0.0288861	1.03244e-08	1.32675e-05	12	4
UniRef90_N1ZZ24	0.589634	0.0346735	1.04127e-08	1.3348e-05	12	4
UniRef90_A0A0U5JN80	0.455981	0.0268229	1.0446e-08	1.33577e-05	12	4
UniRef90_A0A350WYE2	0.161008	0.009481	1.05509e-08	1.34587e-05	12	3
UniRef90_A0A0U5JQ10	0.431399	0.025427	1.06479e-08	1.35491e-05	12	4
UniRef90_A0A347TB31	0.488919	0.0288596	1.08006e-08	1.37098e-05	12	5
UniRef90_A0A059U264	0.468055	0.0276551	1.09037e-08	1.38069e-05	12	4
UniRef90_A0A0R1XRQ8	0.655496	0.0387455	1.09457e-08	1.38263e-05	12	4
UniRef90_D4W4Y3	0.15982	0.00945086	1.09915e-08	1.38505e-05	12	3
UniRef90_A0A0R2DDY9	0.51327	0.0304362	1.12913e-08	1.41255e-05	12	5
UniRef90_S5NDY4	0.596272	0.0353555	1.12831e-08	1.41255e-05	12	4
UniRef90_A0A1V4FKF1	0.418549	0.0248078	1.12403e-08	1.41255e-05	12	4
UniRef90_A0A1Y3UE72	0.412351	0.0244682	1.13646e-08	1.41489e-05	12	4
UniRef90_A0A2S1ER18	0.168435	0.00999455	1.13636e-08	1.41489e-05	12	3
UniRef90_A5VKS3	0.652456	0.0387316	1.141e-08	1.41715e-05	12	5
UniRef90_A0A1C2GCT2	0.402436	0.0239036	1.14748e-08	1.42179e-05	12	4
UniRef90_A0A0R1VPP4	0.845962	0.0502633	1.15088e-08	1.42261e-05	12	4
UniRef90_F8DQM2	0.422501	0.0251219	1.15925e-08	1.42955e-05	12	4
UniRef90_V5P545	0.632136	0.0376465	1.17721e-08	1.44697e-05	12	5
UniRef90_A0A109RMQ1	0.167236	0.00996114	1.17894e-08	1.44697e-05	12	3
UniRef90_A0A0X8G3R6	0.160249	0.00955739	1.19385e-08	1.46181e-05	12	3
UniRef90_R9WGF8	0.502019	0.0299562	1.19982e-08	1.46227e-05	12	4
UniRef90_F8DNE1	0.431104	0.0257295	1.20201e-08	1.46227e-05	12	4
UniRef90_A0A137PLB1	0.416855	0.0248805	1.20268e-08	1.46227e-05	12	4
UniRef90_F8DPF8	0.624072	0.0372742	1.21072e-08	1.46861e-05	12	5
UniRef90_A0A0U5JNP1	0.427341	0.0255539	1.22454e-08	1.48023e-05	12	4
UniRef90_A0A2S1EQW2	0.169291	0.0101244	1.226e-08	1.48023e-05	12	3
UniRef90_B3XP46	0.598933	0.0358583	1.23909e-08	1.4871e-05	12	4
UniRef90_A0A0U5KQJ6	0.484053	0.0289765	1.23748e-08	1.4871e-05	12	4
UniRef90_A0A073JZE6	0.404942	0.0242464	1.24029e-08	1.4871e-05	12	4
UniRef90_A0A081NSG3	0.167498	0.0100409	1.25444e-08	1.5006e-05	12	3
UniRef90_D4W3R2	0.164101	0.00985446	1.27578e-08	1.52263e-05	12	3
UniRef90_A5VJH1	0.627131	0.0376879	1.28499e-08	1.53009e-05	12	4
UniRef90_A0A173WDT9	0.165298	0.00993873	1.29133e-08	1.53413e-05	12	3
UniRef90_A0A256VA20	0.398222	0.0239624	1.30118e-08	1.5423e-05	12	4
UniRef90_S5N4E3	0.640584	0.0385873	1.31469e-08	1.54421e-05	12	5
UniRef90_F8DQF9	0.617597	0.037188	1.30969e-08	1.54421e-05	12	5
UniRef90_A0A1C1ZSL1	0.449342	0.0270638	1.31302e-08	1.54421e-05	12	4
UniRef90_A0A1V4FN33	0.402341	0.0242239	1.30831e-08	1.54421e-05	12	4
UniRef90_B3XR79	0.667407	0.0402281	1.32263e-08	1.54654e-05	12	4
UniRef90_A0A2S1EQY2	0.169665	0.0102244	1.31988e-08	1.54654e-05	12	3
UniRef90_UPI000A2E4EB6	0.48129	0.0290309	1.33192e-08	1.55391e-05	12	4
UniRef90_A0A1Y4NSF2	0.521149	0.0314438	1.3355e-08	1.55459e-05	12	4
UniRef90_A5VHT7	0.6302	0.0380618	1.3486e-08	1.56633e-05	12	6
UniRef90_F8DQ81	0.454039	0.0274551	1.36425e-08	1.58096e-05	12	4
UniRef90_S5NV32	0.762948	0.0461759	1.37621e-08	1.58773e-05	12	5
UniRef90_A0A1X8V960	0.4471	0.0270595	1.37605e-08	1.58773e-05	12	4
UniRef90_A0A0U5JYH4	0.441353	0.0267295	1.38494e-08	1.59426e-05	12	4
UniRef90_S5NND6	0.606976	0.036822	1.40769e-08	1.61687e-05	12	5
UniRef90_A5VIH8	0.584368	0.0354852	1.42107e-08	1.62863e-05	12	4
UniRef90_N2ANA5	0.752021	0.0456942	1.42964e-08	1.63485e-05	12	4
UniRef90_A0A256VGW5	0.583662	0.0355149	1.44946e-08	1.65387e-05	12	4
UniRef90_A0A073JNT6	0.59965	0.0365475	1.4726e-08	1.67659e-05	12	4
UniRef90_P60949	0.528389	0.032241	1.48891e-08	1.68776e-05	12	5
UniRef90_UPI000A041A81	0.500958	0.0305641	1.48747e-08	1.68776e-05	12	4
UniRef90_Q4JLM0	0.604054	0.0368811	1.49802e-08	1.6907e-05	12	5
UniRef90_A5VJB8	0.590286	0.0360399	1.49777e-08	1.6907e-05	12	4
UniRef90_A0A0U5KKU0	0.572031	0.0349824	1.5216e-08	1.71359e-05	12	4
UniRef90_R5EQ88	0.155585	0.00951723	1.52547e-08	1.71423e-05	12	3
UniRef90_C7XU09	0.568044	0.0347666	1.5335e-08	1.71583e-05	12	4
UniRef90_A0A174DJC2	0.166472	0.0101874	1.53157e-08	1.71583e-05	12	3
UniRef90_A0A0U5JR62	0.434335	0.0266007	1.54338e-08	1.7221e-05	12	4
UniRef90_R9WFI7	0.394986	0.0241946	1.54574e-08	1.7221e-05	12	4
UniRef90_A0A0R1Y1F6	0.558654	0.0342336	1.55169e-08	1.72502e-05	12	5
UniRef90_A0A2S1ETT2	0.455098	0.0279109	1.56414e-08	1.73328e-05	12	4
UniRef90_A5VJC8	0.403771	0.0247658	1.56579e-08	1.73328e-05	12	4
UniRef90_A0A1C2A0V5	0.412793	0.0253257	1.56977e-08	1.73399e-05	12	4
UniRef90_A0A0U5JRD5	0.588899	0.0361482	1.57735e-08	1.73645e-05	12	5
UniRef90_S5NN98	0.593643	0.0364427	1.5787e-08	1.73645e-05	12	4
UniRef90_N1ZMT7	0.59965	0.0368299	1.58634e-08	1.73659e-05	12	4
UniRef90_A8YVX6	0.468268	0.0287576	1.58481e-08	1.73659e-05	12	4
UniRef90_A0A0R1Y056	0.170443	0.0104701	1.58886e-08	1.73659e-05	12	3
UniRef90_D4W5Y7	0.167841	0.0103152	1.59619e-08	1.74094e-05	12	3
UniRef90_N1ZY09	0.563251	0.0346296	1.60211e-08	1.74373e-05	12	4
UniRef90_F8DM11	0.474618	0.0291895	1.60701e-08	1.74541e-05	12	4
UniRef90_B3XPV7	0.466514	0.0287107	1.61761e-08	1.7496e-05	12	4
UniRef90_A0A2S1EPR4	0.429718	0.0264437	1.61619e-08	1.7496e-05	12	4
UniRef90_A0A174RK34	0.168702	0.010385	1.62145e-08	1.75011e-05	12	3
UniRef90_A0A1Y3UBQ0	0.412604	0.0254407	1.64729e-08	1.77431e-05	12	4
UniRef90_A0A347T8P0	0.444973	0.0274795	1.67241e-08	1.79764e-05	12	4
UniRef90_A0A0U5JXH3	0.405337	0.0251004	1.71721e-08	1.84197e-05	12	4
UniRef90_B3XP44	0.465939	0.0288903	1.73869e-08	1.86117e-05	12	4
UniRef90_A0A173W354	0.16735	0.0103807	1.74558e-08	1.8647e-05	12	3
UniRef90_A5VK00	0.642991	0.0399774	1.78518e-08	1.89553e-05	12	5
UniRef90_A0A174B7F4	0.479122	0.0297956	1.78904e-08	1.89553e-05	12	4
UniRef90_A5VMP9	0.392161	0.0243832	1.78585e-08	1.89553e-05	12	4
UniRef90_A0A0X1TK16	0.170212	0.0105824	1.78459e-08	1.89553e-05	12	3
UniRef90_R9WHP8	0.611283	0.0381237	1.83928e-08	1.94479e-05	12	5
UniRef90_A0A0U5JSG1	0.461201	0.0287707	1.84368e-08	1.94548e-05	12	4
UniRef90_F8KDX9	0.398598	0.0248715	1.84812e-08	1.94621e-05	12	4
UniRef90_C8P4T9	0.455136	0.0284146	1.85768e-08	1.95231e-05	12	4
UniRef90_Q74I72	0.517491	0.0323177	1.86335e-08	1.95432e-05	12	4
UniRef90_N1ZZ55	0.606005	0.0378667	1.8735e-08	1.95771e-05	12	4
UniRef90_A0A244CJL7	0.473633	0.0295964	1.87413e-08	1.95771e-05	12	4
UniRef90_F8DMS3	0.649774	0.0406135	1.87878e-08	1.95863e-05	12	5
UniRef90_N1ZT91	0.558086	0.0349037	1.88979e-08	1.96616e-05	12	4
UniRef90_N1ZUE2	0.638506	0.0399607	1.90234e-08	1.97132e-05	12	4
UniRef90_S5NCU3	0.419199	0.0262354	1.90231e-08	1.97132e-05	12	4
UniRef90_A0A347T8U1	0.576381	0.0361199	1.92656e-08	1.99055e-05	12	6
UniRef90_D4W5G2	0.151974	0.00952472	1.92856e-08	1.99055e-05	12	3
UniRef90_A5VJ94	0.60096	0.0377147	1.95364e-08	2.00366e-05	12	5
UniRef90_A0A317GHJ7	0.606405	0.0380404	1.94574e-08	2.00366e-05	12	4
UniRef90_A0A0R1IHA9	0.419795	0.0263496	1.95671e-08	2.00366e-05	12	4
UniRef90_C7XXY3	0.400342	0.0251271	1.95562e-08	2.00366e-05	12	4
UniRef90_A0A1X8VAV7	0.582741	0.0366065	1.97187e-08	2.01125e-05	12	4
UniRef90_N2AAW9	0.580348	0.0364519	1.96961e-08	2.01125e-05	12	4
UniRef90_A0A244CCV6	0.382805	0.0240718	1.99155e-08	2.02734e-05	12	4
UniRef90_A0A256VI31	0.505427	0.0317937	1.9983e-08	2.03024e-05	12	5
UniRef90_A0A0R1Y3M3	0.402287	0.0253468	2.02982e-08	2.05823e-05	12	4
UniRef90_A0A174CN18	0.172472	0.0108741	2.04283e-08	2.06739e-05	12	3
UniRef90_S5NEL4	0.468527	0.0295526	2.05131e-08	2.07193e-05	12	4
UniRef90_A0A174PYM3	0.159075	0.0100426	2.06874e-08	2.08547e-05	12	3
UniRef90_A0A174CB75	0.698866	0.0441499	2.08228e-08	2.08619e-05	12	4
UniRef90_B3XLD0	0.558885	0.0353019	2.07954e-08	2.08619e-05	12	4
UniRef90_F8DLK7	0.462466	0.0292057	2.07545e-08	2.08619e-05	12	4
UniRef90_A5VJ57	0.415465	0.0262506	2.08553e-08	2.08619e-05	12	4
UniRef90_R6YZY6	0.386314	0.0244261	2.09987e-08	2.0965e-05	12	4
UniRef90_A0A137PK53	0.388574	0.0245797	2.10872e-08	2.10129e-05	12	4
UniRef90_D0R3K2	0.474161	0.0300083	2.11869e-08	2.10719e-05	12	4
UniRef90_A0A256MCY7	0.170469	0.0107922	2.12573e-08	2.10769e-05	12	3
UniRef90_N2A3Z6	0.158609	0.0100421	2.12731e-08	2.10769e-05	12	3
UniRef90_M9ZS93	0.620932	0.039323	2.13221e-08	2.10852e-05	12	5
UniRef90_C2E672	0.700353	0.0444022	2.15532e-08	2.12732e-05	12	4
UniRef90_B3XRC7	0.549445	0.0348491	2.16397e-08	2.12777e-05	12	4
UniRef90_A0A1C1ZA30	0.425645	0.0269954	2.16274e-08	2.12777e-05	12	4
UniRef90_A0A2A7R817	0.378867	0.0240491	2.18058e-08	2.14004e-05	12	4
UniRef90_A0A068ZVT7	0.517553	0.0328625	2.18708e-08	2.14237e-05	12	4
UniRef90_F8DLK0	0.622451	0.0395642	2.20911e-08	2.15362e-05	12	5
UniRef90_D4YVF2	0.615816	0.0391459	2.21101e-08	2.15362e-05	12	4
UniRef90_A0A2S1EQZ3	0.172042	0.0109346	2.20766e-08	2.15362e-05	12	3
UniRef90_N1ZND4	0.581965	0.0370047	2.2171e-08	2.15552e-05	12	4
UniRef90_B3XN83	0.642571	0.0409074	2.2429e-08	2.16524e-05	12	5
UniRef90_N1ZPC6	0.590311	0.0375961	2.25193e-08	2.16524e-05	12	4
UniRef90_A0A1X8VHL6	0.48573	0.0309312	2.24892e-08	2.16524e-05	12	4
UniRef90_Q64J93	0.476888	0.0303483	2.23483e-08	2.16524e-05	12	4
UniRef90_A0A173YEI2	0.165427	0.0105359	2.25213e-08	2.16524e-05	12	3
UniRef90_N2A2H4	0.152743	0.0097229	2.24056e-08	2.16524e-05	12	3
UniRef90_A0A317GGU4	0.436379	0.0278031	2.26031e-08	2.16909e-05	12	4
UniRef90_A0A0U5JRD8	0.45885	0.0292601	2.2793e-08	2.18327e-05	12	4
UniRef90_C2E6L5	0.681768	0.0434969	2.29021e-08	2.18566e-05	12	5
UniRef90_N2AET0	0.711719	0.0454049	2.28884e-08	2.18566e-05	12	4
UniRef90_A0A1Y4P7R0	0.173195	0.0110675	2.3258e-08	2.21556e-05	12	3
UniRef90_A0A1C1ZZU7	0.153819	0.00983431	2.33706e-08	2.2222e-05	12	3
UniRef90_A0A2R7DSP1	0.635197	0.0406238	2.34426e-08	2.22497e-05	12	5
UniRef90_A0A1X8V7Q5	0.371922	0.0237972	2.35483e-08	2.22686e-05	12	4
UniRef90_A0A2S1EPZ2	0.173254	0.0110844	2.3524e-08	2.22686e-05	12	3
UniRef90_B3XRV4	0.628893	0.0402966	2.38732e-08	2.25276e-05	12	5
UniRef90_A0A0U5JKD4	0.456799	0.0292797	2.39524e-08	2.25276e-05	12	4
UniRef90_A0A173ZHM4	0.156357	0.0100219	2.39496e-08	2.25276e-05	12	3
UniRef90_F8KD70	0.782872	0.0502938	2.44802e-08	2.28584e-05	12	5
UniRef90_A5VIX2	0.665138	0.0427086	2.43613e-08	2.28584e-05	12	5
UniRef90_Q74JD0	0.504408	0.0324021	2.44628e-08	2.28584e-05	12	4
UniRef90_S5N6R1	0.402939	0.0258837	2.44601e-08	2.28584e-05	12	4
UniRef90_A0A143PZ45	0.578806	0.0372104	2.46476e-08	2.29734e-05	12	5
UniRef90_S5NEA9	0.474073	0.0304923	2.47651e-08	2.30135e-05	12	4
UniRef90_A0A173Z6T3	0.173874	0.0111842	2.47792e-08	2.30135e-05	12	3
UniRef90_A0A317GHA5	0.530816	0.0341523	2.48372e-08	2.30261e-05	12	4
UniRef90_A0A1X8VB56	0.451877	0.0290863	2.49429e-08	2.30829e-05	12	4
UniRef90_A0A1Y2UQS2	0.418185	0.0269234	2.49955e-08	2.30904e-05	12	4
UniRef90_UPI000C7CF062	0.161594	0.0104126	2.52039e-08	2.32416e-05	12	3
UniRef90_D4W1M0	0.153056	0.00986835	2.53477e-08	2.33327e-05	12	3
UniRef90_F8DRP1	0.563476	0.0363525	2.54972e-08	2.33882e-05	12	5
UniRef90_A5VKY8	0.556152	0.0358801	2.54981e-08	2.33882e-05	12	4
UniRef90_S5NVB0	0.162857	0.0105092	2.55571e-08	2.3401e-05	12	3
UniRef90_A0A0U5JVR4	0.612806	0.0395678	2.57021e-08	2.34924e-05	12	4
UniRef90_A0A173Y664	0.156419	0.0101045	2.58196e-08	2.35583e-05	12	3
UniRef90_A0A2T5Q4Z7	0.414081	0.0267847	2.61523e-08	2.382e-05	12	4
UniRef90_A0A0X8G351	0.172247	0.0111543	2.64377e-08	2.40377e-05	12	3
UniRef90_N1ZW19	0.643075	0.0416684	2.6587e-08	2.40802e-05	12	4
UniRef90_A0A244CIH4	0.568324	0.036826	2.65945e-08	2.40802e-05	12	4
UniRef90_A0A0U5F4T1	0.558705	0.0362068	2.66236e-08	2.40802e-05	12	4
UniRef90_N2ASP9	0.517111	0.0335347	2.6803e-08	2.42003e-05	12	4
UniRef90_D4W965	0.162347	0.0105307	2.68636e-08	2.4213e-05	12	3
UniRef90_A0A174UT61	0.173508	0.0112576	2.6931e-08	2.42317e-05	12	3
UniRef90_A0A2S1EQ31	0.584831	0.0379582	2.70207e-08	2.42703e-05	12	4
UniRef90_A0A1C2G5S2	0.518425	0.0337136	2.7531e-08	2.46683e-05	12	4
UniRef90_A5VJK2	0.395475	0.0257207	2.75589e-08	2.46683e-05	12	4
UniRef90_A0A3A9DM33	0.38256	0.0249221	2.80024e-08	2.50222e-05	12	4
UniRef90_N2AKW5	0.717386	0.0467821	2.82779e-08	2.50306e-05	12	4
UniRef90_Q7WTB1	0.668693	0.0435859	2.81482e-08	2.50306e-05	12	4
UniRef90_A0A0R1PCL0	0.470298	0.030674	2.83221e-08	2.50306e-05	12	4
UniRef90_UPI000B3FB8D6	0.376094	0.0245322	2.83492e-08	2.50306e-05	12	4
UniRef90_R5A4K7	0.170265	0.0111059	2.8343e-08	2.50306e-05	12	3
UniRef90_D4W6Q1	0.170058	0.011081	2.80621e-08	2.50306e-05	12	3
UniRef90_B3XQI4	0.168955	0.0110192	2.83104e-08	2.50306e-05	12	3
UniRef90_A0A317GGM0	0.662019	0.0432178	2.85714e-08	2.51839e-05	12	5
UniRef90_A5VKV1	0.378581	0.0247414	2.88727e-08	2.54063e-05	12	4
UniRef90_B3XMS2	0.611677	0.0400066	2.90934e-08	2.5471e-05	12	5
UniRef90_N1ZPB9	0.621724	0.04065	2.89988e-08	2.5471e-05	12	4
UniRef90_A0A0U5JYN6	0.5305	0.0346956	2.90801e-08	2.5471e-05	12	4
UniRef90_A0A1Y4P6A1	0.522526	0.0342154	2.94207e-08	2.57142e-05	12	4
UniRef90_A0A0D6A2L1	0.563304	0.0368931	2.94785e-08	2.57214e-05	12	4
UniRef90_S5NPK7	0.595553	0.0390254	2.96252e-08	2.58061e-05	12	5
UniRef90_A0A2S1EP34	0.397245	0.0260398	2.97258e-08	2.58503e-05	12	4
UniRef90_Q5FM79	0.495791	0.0325251	2.9951e-08	2.59159e-05	12	4
UniRef90_A0A0R1XFE9	0.423772	0.0277929	2.9872e-08	2.59159e-05	12	4
UniRef90_A0A174NW31	0.174144	0.011424	2.99444e-08	2.59159e-05	12	3
UniRef90_A0A1S9A9G6	0.717171	0.0470781	3.01347e-08	2.59882e-05	12	5
UniRef90_A5VJE0	0.626263	0.0411104	3.01334e-08	2.59882e-05	12	5
UniRef90_A0A1C1Z7P6	0.376894	0.0247609	3.03702e-08	2.61279e-05	12	4
UniRef90_D4W6E5	0.173946	0.0114288	3.03973e-08	2.61279e-05	12	3
UniRef90_F8DS01	0.574013	0.0377284	3.05041e-08	2.61763e-05	12	5
UniRef90_Q5FM96	0.605521	0.0398078	3.05669e-08	2.61869e-05	12	4
UniRef90_B2G7H6	0.553668	0.0364075	3.06359e-08	2.62028e-05	12	4
UniRef90_A0A2S1ERS9	0.173021	0.0113809	3.0728e-08	2.62383e-05	12	3
UniRef90_A5VJF8	0.696706	0.0458366	3.07869e-08	2.62455e-05	12	5
UniRef90_N1ZP04	0.527163	0.0346912	3.08628e-08	2.6267e-05	12	4
UniRef90_A0A2S1ERW7	0.545107	0.0358793	3.09232e-08	2.62754e-05	12	4
UniRef90_A5VJ99	0.162967	0.0107308	3.10403e-08	2.63318e-05	12	3
UniRef90_A0A0U5JS88	0.623469	0.0410822	3.12512e-08	2.64206e-05	12	5
UniRef90_N2AA98	0.587119	0.038693	3.12976e-08	2.64206e-05	12	4
UniRef90_F8DQR4	0.544119	0.0358524	3.12412e-08	2.64206e-05	12	4
UniRef90_A0A0U5F593	0.562546	0.0370845	3.13865e-08	2.64285e-05	12	4
UniRef90_D4W4Z9	0.154487	0.0101849	3.14088e-08	2.64285e-05	12	3
UniRef90_A0A2K4ZPE1	-0.797271	0.0525801	3.15126e-08	2.64557e-05	12	11
UniRef90_A0A174D3T6	0.174704	0.0115229	3.1543e-08	2.64557e-05	12	3
UniRef90_C2E4F0	0.513945	0.0339054	3.16087e-08	2.6468e-05	12	5
UniRef90_Q562K1	0.579196	0.0382374	3.18269e-08	2.66078e-05	12	5
UniRef90_A0A174NVQ3	0.171223	0.0113057	3.18789e-08	2.66085e-05	12	3
UniRef90_A0A0U5JJ16	0.580029	0.0383248	3.20864e-08	2.67386e-05	12	5
UniRef90_A0A256VHL7	0.630729	0.0417354	3.25385e-08	2.67629e-05	12	6
UniRef90_A0A0U5JM32	0.686025	0.04535	3.22337e-08	2.67629e-05	12	5
UniRef90_A0A0U5JQL6	0.630429	0.0417187	3.2562e-08	2.67629e-05	12	5
UniRef90_A0A0U5JX69	0.583528	0.0386171	3.25794e-08	2.67629e-05	12	5
UniRef90_D4W4Y4	0.695578	0.0459992	3.23537e-08	2.67629e-05	12	4
UniRef90_A0A0R1Y3Z5	0.66692	0.0441197	3.24646e-08	2.67629e-05	12	4
UniRef90_A0A0U5JWS6	0.411382	0.0272126	3.24393e-08	2.67629e-05	12	4
UniRef90_A0A244CHM5	0.174936	0.0115669	3.2306e-08	2.67629e-05	12	3
UniRef90_A0A1C1ZAH6	0.15688	0.0103714	3.22568e-08	2.67629e-05	12	3
UniRef90_A0A0R1XTY5	0.618497	0.0409398	3.26439e-08	2.67694e-05	12	4
UniRef90_A0A081KW05	0.531355	0.0351812	3.27296e-08	2.67694e-05	12	4
UniRef90_I7LAZ6	0.47254	0.0312883	3.27421e-08	2.67694e-05	12	4
UniRef90_A0A0U5KCT5	0.560871	0.0371583	3.29232e-08	2.6833e-05	12	5
UniRef90_A0A109RMK2	0.175493	0.0116247	3.28719e-08	2.6833e-05	12	3
UniRef90_N2A096	0.634626	0.0420587	3.3029e-08	2.6877e-05	12	4
UniRef90_A0A1C2GFD1	0.175796	0.0116545	3.31364e-08	2.69222e-05	12	3
UniRef90_V5P237	0.577284	0.0382879	3.32739e-08	2.69917e-05	12	4
UniRef90_Q74JQ0	0.172905	0.0114734	3.34313e-08	2.7077e-05	12	3
UniRef90_N2A5V1	0.489332	0.0324829	3.35548e-08	2.71347e-05	12	4
UniRef90_Q74J39	0.421757	0.0280028	3.36201e-08	2.71453e-05	12	4
UniRef90_N2A666	0.161154	0.0107105	3.39397e-08	2.73607e-05	12	3
UniRef90_F8DQM1	0.594319	0.0395239	3.41459e-08	2.74843e-05	12	4
UniRef90_B3XPS8	0.641272	0.042677	3.43825e-08	2.75298e-05	12	5
UniRef90_A5VKY3	0.591931	0.0393938	3.43858e-08	2.75298e-05	12	5
UniRef90_B2G609	0.588051	0.0391577	3.45736e-08	2.75298e-05	12	5
UniRef90_A5VMV1	0.55809	0.0371578	3.45301e-08	2.75298e-05	12	5
UniRef90_N1ZM42	0.629038	0.041883	3.45416e-08	2.75298e-05	12	4
UniRef90_N2AGM9	0.446923	0.0297567	3.45341e-08	2.75298e-05	12	4
UniRef90_D0R4R4	0.436138	0.0290367	3.45132e-08	2.75298e-05	12	4
UniRef90_Q046D2	0.586317	0.0390613	3.47362e-08	2.75946e-05	12	4
UniRef90_B3XKV4	0.466082	0.0310534	3.47613e-08	2.75946e-05	12	4
UniRef90_F8DQZ8	0.600269	0.0400577	3.5298e-08	2.79779e-05	12	5
UniRef90_N2AM32	0.723171	0.048287	3.54932e-08	2.80897e-05	12	4
UniRef90_A0A1B3PUV8	0.505897	0.0337907	3.56078e-08	2.81375e-05	12	5
UniRef90_A0A0R1Y9C1	0.637028	0.0425748	3.58129e-08	2.82542e-05	12	5
UniRef90_A0A1C2G9W8	0.396941	0.0265329	3.58642e-08	2.82542e-05	12	4
UniRef90_A0A073JMQ5	0.566388	0.0379223	3.64408e-08	2.86649e-05	12	5
UniRef90_A0A1Y2UMY1	0.521883	0.0349544	3.65612e-08	2.87161e-05	12	4
UniRef90_A0A1C1ZAX4	0.174244	0.0116731	3.66412e-08	2.87354e-05	12	3
UniRef90_S5NVY8	0.720953	0.0483122	3.67403e-08	2.87697e-05	12	5
UniRef90_F8KD06	0.581774	0.0390224	3.70752e-08	2.8987e-05	12	5
UniRef90_A0A3D1Q8Q3	0.173686	0.0116518	3.71294e-08	2.8987e-05	12	3
UniRef90_A0A1C2G633	0.569261	0.0382046	3.72754e-08	2.90572e-05	12	4
UniRef90_A5VIC6	0.645007	0.0432968	3.73472e-08	2.90696e-05	12	5
UniRef90_Q5FL49	0.547429	0.036778	3.76535e-08	2.917e-05	12	5
UniRef90_A0A0R1XPD5	0.574096	0.0385746	3.7701e-08	2.917e-05	12	4
UniRef90_UPI000F040A0C	0.400268	0.0268823	3.75337e-08	2.917e-05	12	4
UniRef90_R9WKS4	0.171537	0.0115249	3.76678e-08	2.917e-05	12	3
UniRef90_A0A1Y4P363	0.567053	0.0381254	3.79298e-08	2.92598e-05	12	5
UniRef90_N2AG11	0.70123	0.0471441	3.79095e-08	2.92598e-05	12	4
UniRef90_F8DM23	0.552315	0.0371662	3.8242e-08	2.93616e-05	12	5
UniRef90_A0A2S1ENW7	0.55202	0.0371477	3.82552e-08	2.93616e-05	12	4
UniRef90_A0A0U5D7Q0	0.529414	0.0356269	3.82599e-08	2.93616e-05	12	4
UniRef90_UPI000988374C	0.172681	0.0116214	3.8288e-08	2.93616e-05	12	3
UniRef90_A5VKT4	0.407794	0.027458	3.84676e-08	2.94559e-05	12	4
UniRef90_F8KBU3	0.505768	0.034076	3.86977e-08	2.95884e-05	12	4
UniRef90_B3XNW4	0.569319	0.038384	3.89525e-08	2.96958e-05	12	5
UniRef90_F8KCU8	0.540719	0.0364544	3.89388e-08	2.96958e-05	12	4
UniRef90_A5VHJ8	0.542844	0.0366109	3.90737e-08	2.97389e-05	12	4
UniRef90_A0A0L8AQP0	0.176774	0.011924	3.91342e-08	2.97389e-05	12	3
UniRef90_R7LE53	0.162533	0.0109648	3.9181e-08	2.97389e-05	12	3
UniRef90_Q0GL74	0.440669	0.0297331	3.92413e-08	2.97412e-05	12	4
UniRef90_R9WLN4	0.534678	0.0361006	3.94963e-08	2.98431e-05	12	5
UniRef90_A5VHN6	0.478404	0.0323054	3.95482e-08	2.98431e-05	12	4
UniRef90_A0A2S1ERN1	0.164649	0.0111173	3.95127e-08	2.98431e-05	12	3
UniRef90_R9WFY5	0.559214	0.0377811	3.97369e-08	2.98553e-05	12	5
UniRef90_N1ZXZ0	0.557791	0.0376789	3.96763e-08	2.98553e-05	12	4
UniRef90_A0A1C1ZNN1	0.484408	0.0327229	3.96881e-08	2.98553e-05	12	4
UniRef90_A0A0R1XQW6	0.593545	0.0401276	3.99952e-08	3.0006e-05	12	4
UniRef90_A0A0R1XXS0	0.413642	0.0279778	4.01711e-08	3.00945e-05	12	4
UniRef90_D4YT68	0.716609	0.0484912	4.0343e-08	3.01797e-05	12	5
UniRef90_Q74H98	0.365273	0.024721	4.04026e-08	3.01808e-05	12	4
UniRef90_A0A0R1XPX0	0.530362	0.0359168	4.06517e-08	3.03232e-05	12	4
UniRef90_A0A073K0Z7	0.603834	0.0409125	4.08434e-08	3.04225e-05	12	5
UniRef90_A0A317GJF1	0.391171	0.0265452	4.14616e-08	3.08388e-05	12	4
UniRef90_A0A0X1TKK6	0.158506	0.0107594	4.15768e-08	3.08802e-05	12	3
UniRef90_A0A174ATA3	0.177141	0.0120264	4.16433e-08	3.08854e-05	12	3
UniRef90_Q042F7	0.510738	0.0347279	4.22581e-08	3.12967e-05	12	4
UniRef90_D0R3Z6	0.169987	0.011561	4.23519e-08	3.13214e-05	12	3
UniRef90_A5VJC5	0.367246	0.0250037	4.27913e-08	3.16014e-05	12	4
UniRef90_A5VLK8	0.457644	0.0311711	4.29587e-08	3.168e-05	12	4
UniRef90_A0A1E1X032	0.687573	0.0468416	4.30425e-08	3.16968e-05	12	7
UniRef90_A0A0U5F5S0	0.567721	0.0387015	4.33104e-08	3.18038e-05	12	5
UniRef90_A0A0R1YJ03	0.612281	0.0417344	4.3263e-08	3.18038e-05	12	4
UniRef90_U6F6J8	0.738525	0.0503651	4.34743e-08	3.18791e-05	12	4
UniRef90_S5N8C6	0.660361	0.0450814	4.39104e-08	3.19835e-05	12	5
UniRef90_N1ZL79	0.578038	0.0394602	4.38976e-08	3.19835e-05	12	4
UniRef90_A0A079YW20	0.567257	0.0387268	4.39247e-08	3.19835e-05	12	4
UniRef90_A0A0R1XW82	0.555229	0.0378856	4.37037e-08	3.19835e-05	12	4
UniRef90_A0A0X1TKA8	0.162156	0.0110686	4.38565e-08	3.19835e-05	12	3
UniRef90_F8DR67	0.386388	0.0264037	4.4324e-08	3.2229e-05	12	4
UniRef90_R9WER1	0.45957	0.0314208	4.4545e-08	3.23444e-05	12	4
UniRef90_Q74II8	0.561013	0.0383957	4.49831e-08	3.26091e-05	12	5
UniRef90_A0A1S9A9J5	0.369095	0.0252638	4.50351e-08	3.26091e-05	12	4
UniRef90_F8DL99	0.476062	0.0326195	4.54863e-08	3.28899e-05	12	4
UniRef90_A0A1C1Z8I7	0.613247	0.0420311	4.56098e-08	3.28972e-05	12	5
UniRef90_F8DRE8	0.387278	0.0265443	4.56232e-08	3.28972e-05	12	4
UniRef90_A0A1X8V929	0.41836	0.0286879	4.58245e-08	3.29965e-05	12	4
UniRef90_A0A1C1Z6X0	0.426725	0.029279	4.60883e-08	3.31405e-05	12	4
UniRef90_A0A173X4F7	0.177304	0.0121678	4.61755e-08	3.31574e-05	12	3
UniRef90_F8DLG0	0.59186	0.0406276	4.6286e-08	3.3188e-05	12	6
UniRef90_A0A2S1ETI8	0.496269	0.0340705	4.63461e-08	3.3188e-05	12	4
UniRef90_A0A347T671	0.57103	0.0392229	4.65714e-08	3.3227e-05	12	5
UniRef90_A0A0R1XM30	0.624754	0.0429151	4.65925e-08	3.3227e-05	12	4
UniRef90_UPI0006527029	0.41716	0.0286514	4.65326e-08	3.3227e-05	12	4
UniRef90_A0A2S1ER05	0.511068	0.0351243	4.68272e-08	3.32729e-05	12	4
UniRef90_UPI000B9847D5	0.459774	0.0316006	4.68492e-08	3.32729e-05	12	4
UniRef90_A0A173Z5V0	0.170823	0.0117375	4.67262e-08	3.32729e-05	12	3
UniRef90_A0A1Q6T5I3	0.176543	0.0121399	4.70702e-08	3.33842e-05	12	3
UniRef90_A0A0R1XPE6	0.489992	0.0337013	4.71677e-08	3.34077e-05	12	4
UniRef90_F8DM85	0.400024	0.0275349	4.75238e-08	3.36141e-05	12	4
UniRef90_A5VHS1	0.640987	0.044134	4.76564e-08	3.36367e-05	12	5
UniRef90_A0A1C2GFC2	0.583218	0.040159	4.76854e-08	3.36367e-05	12	4
UniRef90_A0A1X8VAV2	0.528016	0.036402	4.82422e-08	3.37344e-05	12	5
UniRef90_Q5FIN8	0.664483	0.0457953	4.80927e-08	3.37344e-05	12	4
UniRef90_Q5FJM5	0.62221	0.0428833	4.81076e-08	3.37344e-05	12	4
UniRef90_A0A256VDH5	0.55994	0.0386042	4.82585e-08	3.37344e-05	12	4
UniRef90_A0A173XJZ5	0.177536	0.0122405	4.82787e-08	3.37344e-05	12	3
UniRef90_A0A2S7MWQ1	0.177425	0.0122306	4.81916e-08	3.37344e-05	12	3
UniRef90_A0A174S872	0.177337	0.0122206	4.80462e-08	3.37344e-05	12	3
UniRef90_F8DPI6	0.58366	0.0402519	4.83998e-08	3.37545e-05	12	5
UniRef90_F0NVQ3	0.622275	0.0429244	4.85026e-08	3.37545e-05	12	4
UniRef90_A0A173XRC1	0.178071	0.0122822	4.84618e-08	3.37545e-05	12	3
UniRef90_N1ZVG3	0.51131	0.0352756	4.85754e-08	3.376e-05	12	4
UniRef90_F8DNS1	0.547715	0.0378017	4.8755e-08	3.38395e-05	12	5
UniRef90_F8DM34	0.371288	0.0256581	4.93576e-08	3.4212e-05	12	4
UniRef90_F8KDX0	0.34924	0.0241654	4.99665e-08	3.45879e-05	12	4
UniRef90_C2E6S8	0.589479	0.0408071	5.01855e-08	3.46932e-05	12	5
UniRef90_D0R415	0.411799	0.0285152	5.03211e-08	3.46998e-05	12	4
UniRef90_A0A174C9G2	0.158144	0.0109509	5.03286e-08	3.46998e-05	12	3
UniRef90_R9WHD2	0.169515	0.0117441	5.05668e-08	3.48177e-05	12	3
UniRef90_A5VLG3	0.536851	0.0372121	5.08113e-08	3.4906e-05	12	5
UniRef90_UPI000D2FB47F	0.395562	0.0274196	5.08295e-08	3.4906e-05	12	4
UniRef90_A0A173U7V3	0.159535	0.0110643	5.108e-08	3.50317e-05	12	3
UniRef90_A0A2R7DYM9	0.482846	0.03351	5.1416e-08	3.51723e-05	12	4
UniRef90_A0A174AMV2	0.168752	0.0117117	5.14205e-08	3.51723e-05	12	3
UniRef90_B3XNK6	0.510009	0.0354275	5.18668e-08	3.54246e-05	12	4
UniRef90_A0A256SKQ3	0.441998	0.0307068	5.19258e-08	3.54246e-05	12	4
UniRef90_A0A1Y2UIP5	0.523487	0.0363749	5.20206e-08	3.54427e-05	12	5
UniRef90_A0A2R7DT45	0.50361	0.0350331	5.25836e-08	3.57793e-05	12	4
UniRef90_F8DLY4	0.671811	0.0467472	5.27282e-08	3.57988e-05	12	6
UniRef90_F8DQP5	0.477556	0.0332317	5.27501e-08	3.57988e-05	12	4
UniRef90_A0A2S1ETD1	0.172205	0.0119853	5.28385e-08	3.58119e-05	12	3
UniRef90_A0A174Q896	0.165018	0.0114935	5.32089e-08	3.6016e-05	12	3
UniRef90_N1ZTF6	0.594047	0.0413938	5.34374e-08	3.6097e-05	12	4
UniRef90_A0A0R1Y5X4	0.175365	0.0122203	5.34676e-08	3.6097e-05	12	3
UniRef90_A0A0U5JRI5	0.647251	0.0451099	5.35375e-08	3.60972e-05	12	5
UniRef90_R9WJR7	0.473666	0.0330592	5.42756e-08	3.65474e-05	12	4
UniRef90_A0A173XHV8	0.155194	0.0108397	5.46606e-08	3.6759e-05	12	3
UniRef90_A0A174TAF6	0.168883	0.0117984	5.47742e-08	3.67877e-05	12	3
UniRef90_A0A1I3SU74	0.664725	0.0464487	5.48898e-08	3.68177e-05	12	5
UniRef90_A0A2S1ETC1	0.672798	0.0470234	5.50085e-08	3.68497e-05	12	5
UniRef90_A0A1Y2UBM5	0.481868	0.0336896	5.51761e-08	3.69144e-05	12	4
UniRef90_A0A174A9G6	0.179351	0.0125505	5.56525e-08	3.71852e-05	12	3
UniRef90_N1ZZC1	0.569797	0.0399071	5.6111e-08	3.74434e-05	12	4
UniRef90_F8DPM2	0.636465	0.0445964	5.63536e-08	3.75018e-05	12	5
UniRef90_N2AFB5	0.662021	0.0463924	5.64153e-08	3.75018e-05	12	4
UniRef90_A0A0R1Y3N5	0.5281	0.0369982	5.62783e-08	3.75018e-05	12	4
UniRef90_C2E6H3	0.355593	0.0249272	5.65964e-08	3.75741e-05	12	4
UniRef90_F8DL74	0.349164	0.0245263	5.77078e-08	3.8263e-05	12	4
UniRef90_Q74IC4	0.587978	0.0413147	5.78868e-08	3.83327e-05	12	5
UniRef90_A5VJ98	0.557399	0.0391916	5.82499e-08	3.8524e-05	12	5
UniRef90_F8KCW6	0.524438	0.036901	5.86584e-08	3.87449e-05	12	5
UniRef90_A0A0U5JN45	0.685861	0.0483232	5.9406e-08	3.90976e-05	12	5
UniRef90_A0A0U5JRI4	0.600981	0.0423438	5.94184e-08	3.90976e-05	12	4
UniRef90_A0A2S1EU68	0.395825	0.0278819	5.92749e-08	3.90976e-05	12	4
UniRef90_A0A256VEV5	0.569028	0.0400995	5.95178e-08	3.91135e-05	12	5
UniRef90_C8P5H9	0.544885	0.0384133	5.97438e-08	3.91232e-05	12	5
UniRef90_A0A2S1ERK2	0.490305	0.034571	5.98341e-08	3.91232e-05	12	4
UniRef90_A0A174UH35	0.174484	0.0123019	5.97931e-08	3.91232e-05	12	3
UniRef90_D4W3D2	0.1707	0.0120344	5.97636e-08	3.91232e-05	12	3
UniRef90_A0A347T5X3	0.15857	0.0111834	5.99754e-08	3.91663e-05	12	3
UniRef90_C2E5J6	0.468596	0.0330746	6.04303e-08	3.9315e-05	12	4
UniRef90_D4L2C2	0.175173	0.0123629	6.03712e-08	3.9315e-05	12	3
UniRef90_A0A2S1EQ52	0.170207	0.0120115	6.0328e-08	3.9315e-05	12	3
UniRef90_N1ZY60	0.571987	0.0404134	6.10234e-08	3.96512e-05	12	4
UniRef90_Q4JLH3	0.531696	0.0375912	6.14049e-08	3.98492e-05	12	5
UniRef90_A0A073K138	0.625502	0.0442702	6.20317e-08	4.00059e-05	12	6
UniRef90_A5VJK7	0.565443	0.0399989	6.17265e-08	4.00059e-05	12	5
UniRef90_F8KD68	0.548715	0.0388308	6.19575e-08	4.00059e-05	12	5
UniRef90_N2A7U2	0.517036	0.0365853	6.18991e-08	4.00059e-05	12	4
UniRef90_A0A174UI60	0.169731	0.0120081	6.18028e-08	4.00059e-05	12	3
UniRef90_D1YKZ1	0.578962	0.0409908	6.22413e-08	4.00913e-05	12	5
UniRef90_F8DRF5	0.636675	0.0451049	6.2612e-08	4.01184e-05	12	5
UniRef90_A0A256MD78	0.528422	0.0374488	6.28204e-08	4.01184e-05	12	5
UniRef90_N2A7N7	0.574097	0.0406965	6.29789e-08	4.01184e-05	12	4
UniRef90_A0A0R1XUC6	0.533229	0.0377818	6.26981e-08	4.01184e-05	12	4
UniRef90_A0A0U5JLM3	0.520525	0.0368965	6.29406e-08	4.01184e-05	12	4
UniRef90_A5VHV0	0.481756	0.034148	6.29323e-08	4.01184e-05	12	4
UniRef90_A0A073JN28	0.450643	0.0319229	6.25617e-08	4.01184e-05	12	4
UniRef90_A0A317GLV8	0.382451	0.0271067	6.28809e-08	4.01184e-05	12	4
UniRef90_A0A174S4S8	0.172629	0.0122297	6.26052e-08	4.01184e-05	12	3
UniRef90_D4W780	0.171144	0.0121359	6.31724e-08	4.01431e-05	12	3
UniRef90_A0A174VHM8	0.158424	0.011233	6.31232e-08	4.01431e-05	12	3
UniRef90_A0A0U5CXZ3	0.619209	0.0439327	6.35066e-08	4.01589e-05	12	6
UniRef90_B2G7K3	0.490734	0.0348111	6.33956e-08	4.01589e-05	12	4
UniRef90_D4W870	0.177838	0.012613	6.32887e-08	4.01589e-05	12	3
UniRef90_A0A0X1TL32	0.163925	0.0116291	6.34362e-08	4.01589e-05	12	3
UniRef90_A0A347T7J0	0.176853	0.0125497	6.36049e-08	4.01721e-05	12	3
UniRef90_A0A098QX50	0.366662	0.0260287	6.38375e-08	4.02701e-05	12	4
UniRef90_A5VKG0	0.44079	0.0313165	6.43372e-08	4.0536e-05	12	4
UniRef90_A0A0U5FDJ2	0.658563	0.0468235	6.48e-08	4.07781e-05	12	5
UniRef90_S5N3G5	0.544601	0.038751	6.52839e-08	4.09833e-05	12	5
UniRef90_B3XML4	0.380142	0.0270464	6.52255e-08	4.09833e-05	12	4
UniRef90_S5NAB0	0.685459	0.048796	6.55689e-08	4.10976e-05	12	5
UniRef90_S5N661	0.347879	0.0247667	6.56242e-08	4.10976e-05	12	4
UniRef90_A0A1V4FJY7	0.582288	0.0414999	6.6305e-08	4.14738e-05	12	5
UniRef90_UPI00069F5979	0.180141	0.0128462	6.66746e-08	4.16549e-05	12	3
UniRef90_UPI000590DBD5	0.173667	0.012391	6.70042e-08	4.18105e-05	12	3
UniRef90_A0A174BHJ3	0.173704	0.0124024	6.74626e-08	4.2046e-05	12	3
UniRef90_A0A0R1XY28	0.512914	0.0366415	6.78078e-08	4.21599e-05	12	4
UniRef90_A0A174ABS4	0.173772	0.0124132	6.77692e-08	4.21599e-05	12	3
UniRef90_A0A073JRE2	0.56545	0.0404159	6.81521e-08	4.23233e-05	12	5
UniRef90_N2AKV5	0.668717	0.0478794	6.9282e-08	4.27343e-05	12	4
UniRef90_A0A0X8G2F2	0.592725	0.0424401	6.93078e-08	4.27343e-05	12	4
UniRef90_A0A1C1ZNR8	0.573	0.0410123	6.90592e-08	4.27343e-05	12	4
UniRef90_F4AEP3	0.362325	0.0259338	6.90707e-08	4.27343e-05	12	4
UniRef90_A0A174RSR7	0.168541	0.0120662	6.92159e-08	4.27343e-05	12	3
UniRef90_A0A1Y4WNX2	0.162554	0.011635	6.90712e-08	4.27343e-05	12	3
UniRef90_A0A079YWZ7	0.551245	0.0394771	6.94259e-08	4.27563e-05	12	5
UniRef90_A0A2S1ESY7	0.423901	0.0303612	6.9509e-08	4.27568e-05	12	4
UniRef90_N2A0I1	0.598575	0.0429025	6.99832e-08	4.29975e-05	12	4
UniRef90_F8KEM4	0.519941	0.037286	7.03354e-08	4.31119e-05	12	5
UniRef90_A0A098QW95	0.449741	0.0322482	7.0258e-08	4.31119e-05	12	4
UniRef90_A0A174UFV9	0.18086	0.0129736	7.05279e-08	4.31789e-05	12	3
UniRef90_N2ADN8	0.624318	0.044792	7.06496e-08	4.32024e-05	12	4
UniRef90_A0A1C2G9M1	0.354078	0.0254178	7.10307e-08	4.33844e-05	12	4
UniRef90_A0A2R7DY93	0.527277	0.0378805	7.15594e-08	4.3614e-05	12	4
UniRef90_R9WIG5	0.486533	0.0349542	7.15746e-08	4.3614e-05	12	4
UniRef90_A0A0U5JNX9	0.678933	0.0487977	7.1868e-08	4.36902e-05	12	6
UniRef90_A0A2T5Q1W7	0.462094	0.0332092	7.17969e-08	4.36902e-05	12	4
UniRef90_R7GU87	0.174062	0.0125157	7.21496e-08	4.38101e-05	12	3
UniRef90_A0A0U5JU68	0.56929	0.0409866	7.30401e-08	4.4299e-05	12	5
UniRef90_N1ZUD7	0.576438	0.0415216	7.3383e-08	4.44041e-05	12	4
UniRef90_A5VLI8	0.506043	0.036451	7.33844e-08	4.44041e-05	12	4
UniRef90_Q0VJC5	0.458977	0.0330747	7.36798e-08	4.4453e-05	12	4
UniRef90_S5NYF6	0.373259	0.0268993	7.37222e-08	4.4453e-05	12	4
UniRef90_D0R6C1	0.156038	0.0112441	7.36595e-08	4.4453e-05	12	3
UniRef90_A0A256V246	0.42783	0.0308412	7.39319e-08	4.45277e-05	12	4
UniRef90_A0A256VJK1	0.561388	0.0404821	7.4158e-08	4.46122e-05	12	5
UniRef90_UPI000B998122	0.513187	0.0370162	7.43494e-08	4.46756e-05	12	4
UniRef90_A5VK99	0.549389	0.0396423	7.46155e-08	4.47319e-05	12	4
UniRef90_N2ACP9	0.511175	0.036882	7.45595e-08	4.47319e-05	12	4
UniRef90_A0A165Y311	0.439102	0.0316937	7.48261e-08	4.47548e-05	12	4
UniRef90_A0A174T9U6	0.177835	0.0128356	7.48118e-08	4.47548e-05	12	3
UniRef90_N1ZUC7	0.635216	0.0458748	7.52315e-08	4.49455e-05	12	4
UniRef90_A0A0U5JTH6	0.671017	0.0484918	7.56993e-08	4.5173e-05	12	5
UniRef90_V5P3E4	0.523928	0.0378718	7.58824e-08	4.51917e-05	12	5
UniRef90_N2A2R4	0.663944	0.0479943	7.59047e-08	4.51917e-05	12	4
UniRef90_C8P4K9	0.500248	0.0361702	7.60839e-08	4.52465e-05	12	4
UniRef90_A0A2S1EQQ8	0.521843	0.0377375	7.61957e-08	4.52611e-05	12	5
UniRef90_A0A0U5K0Q2	0.524353	0.037958	7.69482e-08	4.55517e-05	12	5
UniRef90_N1ZX38	0.507506	0.0367346	7.68704e-08	4.55517e-05	12	4
UniRef90_A0A1Y2UQI9	0.339615	0.0245839	7.69204e-08	4.55517e-05	12	4
UniRef90_A0A079YX50	0.525779	0.0380889	7.74831e-08	4.58162e-05	12	5
UniRef90_A0A174SB85	0.169359	0.0122705	7.75827e-08	4.58228e-05	12	3
UniRef90_A5VIK4	0.496216	0.0359638	7.78242e-08	4.59133e-05	12	5
UniRef90_A0A073JNH4	0.653768	0.0474312	7.85899e-08	4.6143e-05	12	5
UniRef90_R9WHP4	0.539895	0.0391548	7.83071e-08	4.6143e-05	12	5
UniRef90_F8DR33	0.521018	0.0378047	7.86802e-08	4.6143e-05	12	5
UniRef90_N2A0T1	0.669449	0.0485884	7.88912e-08	4.6143e-05	12	4
UniRef90_A0A0R1XVQ9	0.535336	0.038845	7.87082e-08	4.6143e-05	12	4
UniRef90_F8DNE4	0.408667	0.0296589	7.88407e-08	4.6143e-05	12	4
UniRef90_E3C9Z0	0.349456	0.0253608	7.88153e-08	4.6143e-05	12	4
UniRef90_A0A0R1P9L9	0.177884	0.0129113	7.89247e-08	4.6143e-05	12	3
UniRef90_A0A1C1ZFN8	0.638372	0.0463409	7.9023e-08	4.61485e-05	12	5
UniRef90_C2EPC7	0.617313	0.0448205	7.91637e-08	4.61788e-05	12	4
UniRef90_A0A0U5K1P0	0.488146	0.0354488	7.93033e-08	4.62083e-05	12	4
UniRef90_A0A174SA87	0.687641	0.0499989	8.02606e-08	4.67137e-05	12	4
UniRef90_A0A0U5JTF7	0.633162	0.0460578	8.05979e-08	4.68574e-05	12	6
UniRef90_R9WIB3	0.448014	0.0325977	8.07858e-08	4.68617e-05	12	4
UniRef90_A0A0X1TK55	0.171759	0.0124958	8.06985e-08	4.68617e-05	12	3
UniRef90_D4W2T2	0.180867	0.0131621	8.09118e-08	4.68824e-05	12	3
UniRef90_A0A174RC70	0.182188	0.013265	8.13028e-08	4.70565e-05	12	3
UniRef90_A0A0R1XU56	0.55371	0.0403239	8.14717e-08	4.71017e-05	12	4
UniRef90_S5NDI2	0.575546	0.0419226	8.16286e-08	4.71399e-05	12	5
UniRef90_A0A0R1XVJ8	0.596175	0.0434382	8.18636e-08	4.72231e-05	12	4
UniRef90_A0A173Z385	0.172598	0.0125847	8.24208e-08	4.74918e-05	12	3
UniRef90_A0A1B3PS64	0.569809	0.0415556	8.25895e-08	4.75362e-05	12	5
UniRef90_A5VLI6	0.593579	0.0433203	8.31571e-08	4.76516e-05	12	5
UniRef90_A5VIU4	0.589311	0.0430084	8.31509e-08	4.76516e-05	12	5
UniRef90_F8DN51	0.532313	0.0388406	8.2987e-08	4.76516e-05	12	5
UniRef90_UPI000C1596EF	0.513075	0.0374362	8.29704e-08	4.76516e-05	12	4
UniRef90_D4W6F1	0.591647	0.043198	8.35022e-08	4.77584e-05	12	4
UniRef90_A0A0R1YBR1	0.562192	0.0410487	8.35275e-08	4.77584e-05	12	4
UniRef90_A0A1B7LP72	0.341978	0.0249778	8.37874e-08	4.78295e-05	12	4
UniRef90_S5N9X4	0.16298	0.0119047	8.3836e-08	4.78295e-05	12	3
UniRef90_A5VI50	0.518754	0.0379206	8.44468e-08	4.79671e-05	12	5
UniRef90_N2ALY4	0.650529	0.0475502	8.43954e-08	4.79671e-05	12	4
UniRef90_N2AS42	0.580576	0.0424377	8.44076e-08	4.79671e-05	12	4
UniRef90_F8DKZ6	0.348769	0.0254902	8.43026e-08	4.79671e-05	12	4
UniRef90_Q74JK7	0.400052	0.0292522	8.46867e-08	4.80508e-05	12	4
UniRef90_N2ALV2	0.623789	0.0456774	8.58502e-08	4.86439e-05	12	4
UniRef90_A0A347T5P1	0.170233	0.0124665	8.59195e-08	4.86439e-05	12	3
UniRef90_C2E6N5	0.491148	0.0359743	8.60682e-08	4.8675e-05	12	4
UniRef90_A0A0G3FGV8	0.59961	0.0439244	8.61765e-08	4.86832e-05	12	5
UniRef90_Q9Z6C9	0.609064	0.0446293	8.64031e-08	4.87582e-05	12	5
UniRef90_A0A0U5KG90	0.499839	0.0366356	8.6624e-08	4.88298e-05	12	5
UniRef90_A0A317G8P0	0.545776	0.0400159	8.69017e-08	4.88802e-05	12	5
UniRef90_A5VHT8	0.539442	0.0395476	8.68185e-08	4.88802e-05	12	5
UniRef90_A0A2R7E026	0.157987	0.0115882	8.72383e-08	4.90164e-05	12	3
UniRef90_A0A1B7LTA3	0.519095	0.0381162	8.81385e-08	4.94686e-05	12	5
UniRef90_N2AJN3	0.584864	0.0429648	8.85168e-08	4.96274e-05	12	4
UniRef90_D4YT78	0.484982	0.0356527	8.91182e-08	4.98031e-05	12	4
UniRef90_A0A0U5JQJ7	0.378392	0.027812	8.89694e-08	4.98031e-05	12	4
UniRef90_D4W738	0.182851	0.0134419	8.91132e-08	4.98031e-05	12	3
UniRef90_A0A0R1Y586	0.655473	0.0482088	8.95213e-08	4.99746e-05	12	4
UniRef90_A0A174ELA1	0.181662	0.0133672	8.99229e-08	5.01449e-05	12	3
UniRef90_A0A0U5CV10	0.671828	0.049442	9.00443e-08	5.01587e-05	12	5
UniRef90_S5NMP0	0.618893	0.0456065	9.11844e-08	5.07394e-05	12	5
UniRef90_A0A0R1XWS6	0.551857	0.0406825	9.1524e-08	5.08738e-05	12	4
UniRef90_A0A073JMY7	0.56572	0.0417245	9.19449e-08	5.10531e-05	12	5
UniRef90_S5N9U4	0.564571	0.0416528	9.22188e-08	5.10959e-05	12	5
UniRef90_R9WIK2	0.397486	0.0293255	9.22152e-08	5.10959e-05	12	4
UniRef90_A0A174RPI3	0.178406	0.0131713	9.28175e-08	5.13728e-05	12	3
UniRef90_N1ZWN7	0.640132	0.047265	9.29187e-08	5.1374e-05	12	4
UniRef90_B2G729	0.58283	0.0430519	9.32871e-08	5.15229e-05	12	4
UniRef90_F8DQF5	0.347113	0.0256592	9.39483e-08	5.18329e-05	12	4
UniRef90_A0A0U5JWS2	0.621063	0.0459305	9.43471e-08	5.1922e-05	12	5
UniRef90_N2ASF6	0.577567	0.0427167	9.44098e-08	5.1922e-05	12	4
UniRef90_A8I231	0.3995	0.0295466	9.43977e-08	5.1922e-05	12	4
UniRef90_A5VKR8	0.552652	0.0408822	9.45879e-08	5.19649e-05	12	5
UniRef90_A0A174TQ25	0.182523	0.0135092	9.50671e-08	5.2173e-05	12	3
UniRef90_F8KF95	0.49748	0.036829	9.52803e-08	5.22347e-05	12	5
UniRef90_F8DRV1	0.583743	0.0432715	9.64691e-08	5.2775e-05	12	5
UniRef90_A5VLL4	0.564983	0.0418766	9.63776e-08	5.2775e-05	12	5
UniRef90_A0A256VJT0	0.183762	0.0136278	9.68754e-08	5.29415e-05	12	3
UniRef90_A0A0U5JKJ4	0.428447	0.0317858	9.72238e-08	5.3076e-05	12	4
UniRef90_A0A0R1XQY4	0.486533	0.0361067	9.75216e-08	5.31827e-05	12	4
UniRef90_N2AFS5	0.586169	0.0435111	9.77419e-08	5.32447e-05	12	4
UniRef90_Q74I75	0.400001	0.0296951	9.78404e-08	5.32447e-05	12	4
UniRef90_S5NPA3	0.596666	0.0443089	9.81328e-08	5.33084e-05	12	5
UniRef90_D4W873	0.176488	0.0131065	9.81629e-08	5.33084e-05	12	3
UniRef90_A0A0R2I117	0.450965	0.033495	9.83001e-08	5.33271e-05	12	4
UniRef90_B3XPP5	0.510584	0.0379458	9.88584e-08	5.3574e-05	12	4
UniRef90_A0A2N6QXA7	0.562266	0.0418087	9.93565e-08	5.37878e-05	12	5
UniRef90_F8DKT6	0.583352	0.0433902	9.96521e-08	5.38916e-05	12	5
UniRef90_A0A355X4J5	0.426336	0.0317361	1.00401e-07	5.424e-05	12	5
UniRef90_A0A174RJ13	0.166336	0.0123914	1.01133e-07	5.45788e-05	12	3
UniRef90_A0A0U5JLX8	0.435333	0.032449	1.01681e-07	5.47609e-05	12	4
UniRef90_R9WE01	0.42035	0.0313297	1.01603e-07	5.47609e-05	12	4
UniRef90_F8KCL0	0.713295	0.0531777	1.01859e-07	5.47997e-05	12	5
UniRef90_A0A0R2BP60	0.167701	0.0125059	1.02123e-07	5.48846e-05	12	3
UniRef90_A0A174Q279	0.164194	0.0122469	1.02326e-07	5.4937e-05	12	3
UniRef90_A5VK93	0.400147	0.029863	1.02879e-07	5.51767e-05	12	4
UniRef90_A5VKR7	0.519229	0.0387698	1.03375e-07	5.5386e-05	12	5
UniRef90_Q74IY5	0.585139	0.043703	1.03642e-07	5.54021e-05	12	5
UniRef90_N2AGJ2	0.685972	0.0512379	1.03716e-07	5.54021e-05	12	4
UniRef90_A0A2R7DXT0	0.529573	0.0395562	1.03726e-07	5.54021e-05	12	4
UniRef90_N1ZY39	0.672606	0.05026	1.0412e-07	5.55441e-05	12	4
UniRef90_N2AFB2	0.491429	0.0367249	1.04205e-07	5.55441e-05	12	4
UniRef90_Q74IZ7	0.422729	0.031606	1.04681e-07	5.57404e-05	12	4
UniRef90_A5VI81	0.571697	0.0427831	1.05601e-07	5.61723e-05	12	5
UniRef90_S5N4D1	0.597739	0.0447445	1.05882e-07	5.62643e-05	12	5
UniRef90_N2ACZ2	0.590561	0.0442536	1.06944e-07	5.66552e-05	12	4
UniRef90_N2ACK8	0.582871	0.0436868	1.07163e-07	5.66552e-05	12	4
UniRef90_A0A174SZQ5	0.169208	0.0126815	1.07101e-07	5.66552e-05	12	3
UniRef90_F8DPM5	0.15993	0.0119824	1.06782e-07	5.66552e-05	12	3
UniRef90_A0A173X9P9	0.157383	0.0117943	1.07016e-07	5.66552e-05	12	3
UniRef90_A0A073K045	0.712294	0.0534144	1.07685e-07	5.68733e-05	12	5
UniRef90_N1ZQ57	0.574448	0.0430859	1.07887e-07	5.69223e-05	12	4
UniRef90_A0A1V4FNA1	0.49129	0.0368533	1.08015e-07	5.69318e-05	12	5
UniRef90_A0A316QTX6	0.175568	0.0131716	1.08147e-07	5.69433e-05	12	3
UniRef90_A0A073JZP3	0.38293	0.0287373	1.08461e-07	5.70336e-05	12	4
UniRef90_A0A174VWG8	0.167876	0.0125993	1.08538e-07	5.70336e-05	12	3
UniRef90_Q74J62	0.592589	0.0444997	1.0912e-07	5.72815e-05	12	5
UniRef90_A5VLG6	0.587589	0.0441291	1.09235e-07	5.7284e-05	12	5
UniRef90_N2A9Z0	0.623475	0.0468463	1.09726e-07	5.74834e-05	12	4
UniRef90_F8DPC0	0.428395	0.032208	1.10359e-07	5.77119e-05	12	4
UniRef90_UPI0001FD88BE	0.173474	0.0130426	1.10385e-07	5.77119e-05	12	3
UniRef90_A0A2R7DSH3	0.374885	0.0281983	1.10856e-07	5.79003e-05	12	4
UniRef90_N2AJX4	0.511761	0.0385075	1.11229e-07	5.80364e-05	12	4
UniRef90_N2ASP1	0.645349	0.0485829	1.11744e-07	5.81883e-05	12	4
UniRef90_A0A1Y3UED8	0.18393	0.0138454	1.11655e-07	5.81883e-05	12	3
UniRef90_A0A073JMH1	0.495629	0.0373192	1.11957e-07	5.82405e-05	12	5
UniRef90_A0A347T8J5	0.172186	0.0129686	1.1225e-07	5.82762e-05	12	3
UniRef90_A0A174UPE0	0.157332	0.0118487	1.12148e-07	5.82762e-05	12	3
UniRef90_A0A2R7DQU0	0.355788	0.026807	1.12648e-07	5.84244e-05	12	4
UniRef90_A0A1V4FN51	0.697419	0.0525982	1.1369e-07	5.88546e-05	12	7
UniRef90_N1ZQB7	0.516795	0.0389764	1.13704e-07	5.88546e-05	12	4
UniRef90_A0A317GHS7	0.567101	0.0427766	1.1386e-07	5.88766e-05	12	5
UniRef90_UPI000C0B9678	0.330464	0.0249385	1.14361e-07	5.90771e-05	12	4
UniRef90_N1ZMV7	0.599771	0.0452691	1.14537e-07	5.91088e-05	12	4
UniRef90_N2ALY2	0.567112	0.0428167	1.14857e-07	5.92152e-05	12	4
UniRef90_A0A0U5FBM1	0.779887	0.0588999	1.15208e-07	5.92784e-05	12	4
UniRef90_N1ZVI4	0.668969	0.0505201	1.15143e-07	5.92784e-05	12	4
UniRef90_A0A378HB73	0.442999	0.0334672	1.15542e-07	5.93915e-05	12	4
UniRef90_S5NA69	0.536742	0.0405623	1.159e-07	5.94152e-05	12	5
UniRef90_R9JI74	0.180323	0.0136276	1.15931e-07	5.94152e-05	12	3
UniRef90_A0A0R2I2P0	0.171909	0.0129915	1.15909e-07	5.94152e-05	12	3
UniRef90_A0A0U5JQE7	0.429095	0.0324418	1.16393e-07	5.9593e-05	12	4
UniRef90_A0A0R1Y320	0.614717	0.046491	1.16757e-07	5.97205e-05	12	4
UniRef90_A0A0U5JK93	0.463081	0.0350305	1.17001e-07	5.97863e-05	12	4
UniRef90_A0A0U5F1K7	0.484908	0.0366952	1.17411e-07	5.9937e-05	12	5
UniRef90_A5VIG4	0.653736	0.0494858	1.17744e-07	6.00476e-05	12	7
UniRef90_A0A0R1XWJ7	0.528546	0.0400191	1.18019e-07	6.01291e-05	12	4
UniRef90_N1ZQV5	0.810717	0.0614091	1.18481e-07	6.0305e-05	12	4
UniRef90_D4W501	0.181285	0.0137334	1.18611e-07	6.03121e-05	12	3
UniRef90_A0A081NQW3	0.167228	0.012671	1.18835e-07	6.03671e-05	12	3
UniRef90_A5VKT1	0.552752	0.0418874	1.18973e-07	6.0378e-05	12	5
UniRef90_B3XQE3	0.771833	0.0584986	1.19154e-07	6.0411e-05	12	5
UniRef90_A0A073JN45	0.686172	0.0520224	1.19506e-07	6.05091e-05	12	5
UniRef90_A0A0R1XTN1	0.565441	0.042873	1.19608e-07	6.05091e-05	12	4
UniRef90_S5N8A0	0.370461	0.0280914	1.19697e-07	6.05091e-05	12	4
UniRef90_A0A244CIG6	0.642371	0.0487468	1.20565e-07	6.08293e-05	12	5
UniRef90_C2E6L3	0.169378	0.0128528	1.20516e-07	6.08293e-05	12	3
UniRef90_A0A0U5FDF5	0.669707	0.0508368	1.20915e-07	6.08771e-05	12	5
UniRef90_A5VLG2	0.548366	0.0416337	1.21129e-07	6.08771e-05	12	5
UniRef90_A0A0U5JWA1	0.50046	0.0379896	1.20921e-07	6.08771e-05	12	5
UniRef90_UPI000C1BB586	0.162185	0.0123126	1.2104e-07	6.08771e-05	12	3
UniRef90_F8DQG7	0.613906	0.0466552	1.22259e-07	6.13856e-05	12	5
UniRef90_A0A081NN64	0.409751	0.0311437	1.22397e-07	6.13957e-05	12	4
UniRef90_C2E6H2	0.531348	0.0404021	1.22868e-07	6.15721e-05	12	5
UniRef90_N2A1Y4	0.519037	0.039503	1.23963e-07	6.2061e-05	12	4
UniRef90_A0A073JPB6	0.426712	0.0324975	1.24735e-07	6.23873e-05	12	4
UniRef90_N1ZQ34	0.663119	0.0505277	1.25344e-07	6.26315e-05	12	4
UniRef90_A5VIU7	0.529039	0.0403225	1.25679e-07	6.27388e-05	12	5
UniRef90_Q5FKY2	0.605412	0.0461507	1.25863e-07	6.27704e-05	12	4
UniRef90_R9WHA7	0.579617	0.0442081	1.26506e-07	6.30304e-05	12	5
UniRef90_A0A137PJH6	0.422048	0.0322033	1.27002e-07	6.32168e-05	12	5
UniRef90_D4YRW8	0.328456	0.0250706	1.27417e-07	6.33624e-05	12	4
UniRef90_A0A0R1Y2Z7	0.667115	0.0509315	1.2769e-07	6.34375e-05	12	4
UniRef90_A0A317GBH9	0.583612	0.0445843	1.28451e-07	6.37348e-05	12	5
UniRef90_A0A0R1XTP0	0.496438	0.0379274	1.28534e-07	6.37348e-05	12	4
UniRef90_A0A317G759	0.511775	0.0391112	1.28914e-07	6.38622e-05	12	5
UniRef90_A0A1C2G5I3	0.624732	0.0477685	1.2955e-07	6.41162e-05	12	5
UniRef90_Q74J68	0.403405	0.0308541	1.299e-07	6.42105e-05	12	4
UniRef90_A0A0X1TKT7	0.172439	0.0131898	1.29988e-07	6.42105e-05	12	3
UniRef90_A0A0R1XXS7	0.455077	0.0348149	1.30212e-07	6.426e-05	12	4
UniRef90_A0A1C1ZSQ5	0.532097	0.040742	1.3127e-07	6.46591e-05	12	4
UniRef90_D4W610	0.165507	0.0126724	1.31241e-07	6.46591e-05	12	3
UniRef90_B3XPI4	0.506789	0.0388157	1.31642e-07	6.47812e-05	12	5
UniRef90_S5NE70	0.492942	0.0377684	1.32083e-07	6.49363e-05	12	5
UniRef90_D4W3Q4	0.15833	0.0121353	1.32534e-07	6.50967e-05	12	3
UniRef90_N2ALX0	0.610352	0.0468232	1.33672e-07	6.55936e-05	12	4
UniRef90_A0A256VAH8	0.470834	0.0361269	1.33915e-07	6.56506e-05	12	4
UniRef90_A0A0R1Y6D8	0.46535	0.0357193	1.34382e-07	6.57049e-05	12	5
UniRef90_N1ZSZ9	0.551184	0.0423083	1.34399e-07	6.57049e-05	12	4
UniRef90_A0A073JQM3	0.343366	0.0263582	1.34486e-07	6.57049e-05	12	4
UniRef90_R6R4U9	0.186306	0.0143021	1.34532e-07	6.57049e-05	12	3
UniRef90_A0A1Y2V9D4	0.185544	0.0142461	1.34747e-07	6.57481e-05	12	3
UniRef90_N2AHL9	0.182109	0.0139847	1.34965e-07	6.57927e-05	12	3
UniRef90_A0A0U5KFC4	0.51363	0.0394679	1.3577e-07	6.61028e-05	12	4
UniRef90_A0A317G8N2	0.184428	0.0141726	1.35856e-07	6.61028e-05	12	3
UniRef90_UPI000721A57D	0.451576	0.0347243	1.36691e-07	6.64469e-05	12	4
UniRef90_A5VKA0	0.378453	0.0291162	1.37352e-07	6.6706e-05	12	4
UniRef90_A0A1C1ZZS3	0.597617	0.0460001	1.3799e-07	6.6828e-05	12	5
UniRef90_A0A1B3PS85	0.378905	0.0291648	1.37968e-07	6.6828e-05	12	4
UniRef90_B3XM32	0.163569	0.0125897	1.37927e-07	6.6828e-05	12	3
UniRef90_Q74LB3	0.632676	0.0487476	1.39309e-07	6.7404e-05	12	6
UniRef90_UPI0006B583AB	0.174696	0.0134676	1.40033e-07	6.76911e-05	12	3
UniRef90_N2ASF0	0.617029	0.047618	1.41437e-07	6.83062e-05	12	4
UniRef90_A0A0U5JY62	0.588804	0.0454452	1.41595e-07	6.83191e-05	12	5
UniRef90_A0A1Y4P5Y5	0.397272	0.0306675	1.41824e-07	6.83659e-05	12	4
UniRef90_A0A347T9Y1	0.558109	0.0430971	1.42252e-07	6.8509e-05	12	4
UniRef90_A0A0U5JI23	0.599417	0.0463017	1.42684e-07	6.85897e-05	12	5
UniRef90_D0R2U8	0.161964	0.01251	1.42591e-07	6.85897e-05	12	3
UniRef90_A0A0U5JZ55	0.539855	0.0417275	1.43551e-07	6.87445e-05	12	5
UniRef90_N2ARH6	0.67114	0.0518772	1.43608e-07	6.87445e-05	12	4
UniRef90_N2A163	0.540534	0.0417786	1.43506e-07	6.87445e-05	12	4
UniRef90_C2E4J8	0.186871	0.0144408	1.43249e-07	6.87445e-05	12	3
UniRef90_R6NPI9	0.184398	0.0142549	1.43753e-07	6.87445e-05	12	3
UniRef90_F7KJG8	0.169407	0.0130965	1.43801e-07	6.87445e-05	12	3
UniRef90_A5VJD5	0.54454	0.0421073	1.44125e-07	6.88038e-05	12	5
UniRef90_A0A317GP95	0.411189	0.0317973	1.4419e-07	6.88038e-05	12	4
UniRef90_P26929	0.53204	0.0411526	1.4452e-07	6.88347e-05	12	5
UniRef90_N2ACA1	0.567447	0.0438872	1.44394e-07	6.88347e-05	12	4
UniRef90_D4W335	0.162168	0.0125483	1.45039e-07	6.90186e-05	12	3
UniRef90_F8DP81	0.545049	0.0422119	1.46255e-07	6.95057e-05	12	5
UniRef90_A0A0R1Y195	0.502062	0.0388848	1.4633e-07	6.95057e-05	12	4
UniRef90_N2A3Q1	0.497976	0.0385836	1.46878e-07	6.96383e-05	12	4
UniRef90_D4W218	0.177511	0.0137527	1.46777e-07	6.96383e-05	12	3
UniRef90_Q74J45	0.365371	0.028313	1.4706e-07	6.96609e-05	12	4
UniRef90_F8DQ44	0.696921	0.054017	1.47368e-07	6.96951e-05	12	5
UniRef90_A5VL03	0.550812	0.0426975	1.47535e-07	6.96951e-05	12	5
UniRef90_A0A0U5JYV8	0.438193	0.0339661	1.47473e-07	6.96951e-05	12	4
UniRef90_UPI000D31BA8D	0.158444	0.0122849	1.47846e-07	6.97788e-05	12	3
UniRef90_S5NXH1	0.595604	0.046198	1.48396e-07	6.99749e-05	12	5
UniRef90_A0A073JR01	0.603481	0.0468345	1.49166e-07	7.02738e-05	12	5
UniRef90_A0A1C1ZQI3	0.427405	0.0332068	1.50752e-07	7.09568e-05	12	4
UniRef90_S5NB51	0.631058	0.0490568	1.51554e-07	7.12695e-05	12	5
UniRef90_N1ZMC9	0.483634	0.0376111	1.52113e-07	7.14678e-05	12	4
UniRef90_A0A1Y4P7E3	0.619438	0.0482108	1.53272e-07	7.16349e-05	12	5
UniRef90_C2E2Z8	0.560526	0.0436159	1.52944e-07	7.16349e-05	12	5
UniRef90_F8KEK1	0.532994	0.0414696	1.52805e-07	7.16349e-05	12	5
UniRef90_A0A0U5JLW6	0.495591	0.0385725	1.53297e-07	7.16349e-05	12	5
UniRef90_Q5FKR8	0.536381	0.0417443	1.53193e-07	7.16349e-05	12	4
UniRef90_A0A174RB39	0.178018	0.01385	1.52739e-07	7.16349e-05	12	3
UniRef90_UPI00040A6364	0.330619	0.0257352	1.53448e-07	7.16412e-05	12	4
UniRef90_A0A0R1XQL8	0.592723	0.0461628	1.54256e-07	7.18892e-05	12	4
UniRef90_N1ZT25	0.584112	0.0454894	1.5417e-07	7.18892e-05	12	4
UniRef90_A0A1Y4P5W6	0.16496	0.0128497	1.54512e-07	7.1944e-05	12	3
UniRef90_A0A0U5D4Q6	0.540802	0.0421466	1.55214e-07	7.21414e-05	12	5
UniRef90_N1ZX48	0.500023	0.0389652	1.5509e-07	7.21414e-05	12	4
UniRef90_A0A1C1ZPM6	0.605847	0.047229	1.55629e-07	7.21755e-05	12	5
UniRef90_A0A2S1ER78	0.587941	0.0458355	1.55705e-07	7.21755e-05	12	5
UniRef90_N2ADN4	0.652971	0.0508963	1.55445e-07	7.21755e-05	12	4
UniRef90_N1ZQP2	0.597668	0.0466002	1.55905e-07	7.22041e-05	12	4
UniRef90_N2AD35	0.661636	0.0516025	1.56326e-07	7.23342e-05	12	4
UniRef90_A5VI94	0.593197	0.0462741	1.56628e-07	7.24094e-05	12	5
UniRef90_N2AKQ7	0.575397	0.0448934	1.56884e-07	7.24633e-05	12	4
UniRef90_N2ABF7	0.673971	0.0526014	1.57371e-07	7.26236e-05	12	4
UniRef90_N2APU6	0.58657	0.0457925	1.57778e-07	7.27469e-05	12	4
UniRef90_A0A173T838	0.179947	0.01405	1.5797e-07	7.27706e-05	12	3
UniRef90_A0A0U5FIU8	0.528534	0.0412748	1.58249e-07	7.28346e-05	12	5
UniRef90_A0A256VHU7	0.627155	0.0489849	1.58512e-07	7.28837e-05	12	5
UniRef90_UPI000D31EC87	0.6125	0.0478487	1.58777e-07	7.28837e-05	12	5
UniRef90_A5VLH4	0.542999	0.0424162	1.58668e-07	7.28837e-05	12	5
UniRef90_A0A0U5JPY5	0.505795	0.0395214	1.59101e-07	7.29682e-05	12	5
UniRef90_F8KFE9	0.441155	0.0344791	1.59471e-07	7.30733e-05	12	4
UniRef90_A0A256VHT6	0.306599	0.0239676	1.59782e-07	7.31509e-05	12	4
UniRef90_Q74LU1	0.392909	0.0307255	1.60314e-07	7.33301e-05	12	4
UniRef90_A0A0S4NN69	0.690238	0.0539821	1.60471e-07	7.33371e-05	12	5
UniRef90_N2A0E8	0.54809	0.0428943	1.61514e-07	7.36842e-05	12	4
UniRef90_A0A0X8G1W9	0.187894	0.0147035	1.61379e-07	7.36842e-05	12	3
UniRef90_S5NRF2	0.17252	0.013508	1.62228e-07	7.39448e-05	12	3
UniRef90_A0A366KEY5	0.174192	0.0136484	1.63302e-07	7.43692e-05	12	3
UniRef90_A0A0R1XVU0	0.62072	0.0486462	1.6366e-07	7.4467e-05	12	4
UniRef90_K0XCV8	0.170571	0.0133692	1.63824e-07	7.44761e-05	12	3
UniRef90_A5VKR5	0.424099	0.033245	1.64035e-07	7.45069e-05	12	4
UniRef90_N2A0T6	0.541698	0.042474	1.64418e-07	7.46156e-05	12	4
UniRef90_Q5FM93	0.573327	0.0449715	1.65028e-07	7.4751e-05	12	6
UniRef90_A0A0R1Y0I1	0.470662	0.0369194	1.65067e-07	7.4751e-05	12	4
UniRef90_A0A0X8G2Y2	0.188107	0.0147575	1.65292e-07	7.4751e-05	12	3
UniRef90_A0A0X1TK19	0.173842	0.0136381	1.6526e-07	7.4751e-05	12	3
UniRef90_S5N9V5	0.483105	0.0379291	1.66461e-07	7.52138e-05	12	5
UniRef90_A0A079YSU2	0.440125	0.0345689	1.67106e-07	7.54397e-05	12	4
UniRef90_A0A2S1EP37	0.612754	0.0481345	1.67329e-07	7.5475e-05	12	4
UniRef90_A0A2S1ENM4	0.535737	0.042101	1.6795e-07	7.56894e-05	12	5
UniRef90_F8DRV5	0.563141	0.0442712	1.6855e-07	7.58485e-05	12	5
UniRef90_Q74HW0	0.187894	0.0147717	1.68596e-07	7.58485e-05	12	3
UniRef90_A0A0R1X9P8	0.400582	0.0315004	1.68991e-07	7.59603e-05	12	4
UniRef90_A0A256VC19	0.500708	0.0393887	1.69595e-07	7.6166e-05	12	4
UniRef90_Q74LD5	0.419278	0.0329919	1.70031e-07	7.6296e-05	12	5
UniRef90_S5N5E4	0.642277	0.0505737	1.71137e-07	7.65419e-05	12	5
UniRef90_F8KC48	0.60847	0.0479127	1.71169e-07	7.65419e-05	12	5
UniRef90_A0A1Y4P6B2	0.500288	0.0393936	1.7115e-07	7.65419e-05	12	5
UniRef90_A0A1Y3U0L5	0.382452	0.0301115	1.70964e-07	7.65419e-05	12	4
UniRef90_B2GAT1	0.477291	0.0375921	1.7155e-07	7.66464e-05	12	5
UniRef90_Q74J72	0.456828	0.0359921	1.7208e-07	7.6817e-05	12	5
UniRef90_R9WF36	0.604404	0.0476399	1.72788e-07	7.69054e-05	12	5
UniRef90_A0A1V4FI44	0.528305	0.0416475	1.73019e-07	7.69054e-05	12	5
UniRef90_A0A2R7EXZ8	0.629147	0.0495792	1.72428e-07	7.69054e-05	12	4
UniRef90_R9WKR4	0.61009	0.0480904	1.72866e-07	7.69054e-05	12	4
UniRef90_A0A174AYI2	0.173028	0.0136397	1.72959e-07	7.69054e-05	12	3
UniRef90_N1ZN57	0.520069	0.0410145	1.73669e-07	7.71282e-05	12	4
UniRef90_A0A0S4NNJ4	0.440782	0.0347707	1.74093e-07	7.72507e-05	12	4
UniRef90_A0A081NN63	0.549504	0.0433557	1.74423e-07	7.73307e-05	12	5
UniRef90_A0A2S1ETB0	0.529636	0.0418019	1.74965e-07	7.75049e-05	12	5
UniRef90_N2ADN2	0.599732	0.0473394	1.75148e-07	7.75201e-05	12	4
UniRef90_A5VHF3	0.530229	0.0418572	1.75302e-07	7.75218e-05	12	5
UniRef90_A0A2S1ERC3	0.502721	0.039694	1.75651e-07	7.761e-05	12	5
UniRef90_N1ZXG0	0.552225	0.0436161	1.76162e-07	7.77697e-05	12	4
UniRef90_F8KBC5	0.55763	0.0440605	1.76825e-07	7.79877e-05	12	5
UniRef90_A0A1V4FMC5	0.168185	0.01329	1.76956e-07	7.79877e-05	12	3
UniRef90_A0A0U5JT87	0.610695	0.0482696	1.77387e-07	7.81114e-05	12	5
UniRef90_D4W4M3	0.181947	0.0143858	1.77923e-07	7.8281e-05	12	3
UniRef90_S5N6L6	0.575208	0.0455046	1.78869e-07	7.8594e-05	12	5
UniRef90_S5NNS4	0.556792	0.0440496	1.78937e-07	7.8594e-05	12	5
UniRef90_A5VJ33	0.672246	0.0532384	1.80694e-07	7.92986e-05	12	5
UniRef90_Q043A9	0.37988	0.0300893	1.80964e-07	7.93501e-05	12	4
UniRef90_A0A0U5F5M8	0.504625	0.0399801	1.81397e-07	7.94727e-05	12	4
UniRef90_A8YTF1	0.646258	0.0512384	1.82644e-07	7.99514e-05	12	4
UniRef90_A0A1W1ZI35	0.181768	0.0144152	1.83094e-07	8.0081e-05	12	3
UniRef90_Q74I74	0.345178	0.0273788	1.83366e-07	8.01325e-05	12	4
UniRef90_A0A0U5JWR3	0.640798	0.0508703	1.84858e-07	8.07167e-05	12	5
UniRef90_A0A174PS17	0.160989	0.0127854	1.85561e-07	8.09556e-05	12	3
UniRef90_A0A1C2GA53	0.587482	0.0466779	1.86369e-07	8.11198e-05	12	5
UniRef90_A5VJC7	0.457853	0.0363824	1.86563e-07	8.11198e-05	12	5
UniRef90_A0A174UTQ6	0.169313	0.013454	1.86546e-07	8.11198e-05	12	3
UniRef90_A0A350X3V9	0.16038	0.0127427	1.8635e-07	8.11198e-05	12	3
UniRef90_C8P601	0.525986	0.0418208	1.87596e-07	8.14071e-05	12	5
UniRef90_Q042I3	0.49481	0.0393434	1.8766e-07	8.14071e-05	12	4
UniRef90_A0A174PUW0	0.170583	0.0135637	1.87694e-07	8.14071e-05	12	3
UniRef90_A0A1Y4NX45	0.1879	0.0149498	1.8879e-07	8.18142e-05	12	3
UniRef90_B2G8D6	0.600976	0.0478415	1.89769e-07	8.21697e-05	12	5
UniRef90_A0A0R1XTD0	0.555117	0.0442028	1.90254e-07	8.23113e-05	12	4
UniRef90_A0A0U5F1K1	0.569136	0.0453335	1.90827e-07	8.23875e-05	12	5
UniRef90_A0A0R1XRT0	0.608619	0.0484765	1.90756e-07	8.23875e-05	12	4
UniRef90_N2AKW0	0.590805	0.0470616	1.90907e-07	8.23875e-05	12	4
UniRef90_A0A2S1ENA5	0.790608	0.0629938	1.91381e-07	8.24958e-05	12	5
UniRef90_C2E3D0	0.310318	0.0247267	1.91475e-07	8.24958e-05	12	4
UniRef90_C2E5Z1	0.519295	0.0413821	1.91642e-07	8.2499e-05	12	5
UniRef90_A0A0U5JTQ4	0.625022	0.04982	1.92102e-07	8.26285e-05	12	5
UniRef90_A0A371AYD1	0.327187	0.0260857	1.92515e-07	8.27376e-05	12	4
UniRef90_A0A0U5KJZ7	0.490867	0.0391461	1.93004e-07	8.28795e-05	12	5
UniRef90_D4W1G5	0.494444	0.039438	1.93312e-07	8.29431e-05	12	4
UniRef90_A0A081NSQ8	0.441336	0.0352055	1.93494e-07	8.29526e-05	12	4
UniRef90_A0A1C2G859	0.420195	0.0335312	1.9416e-07	8.31692e-05	12	4
UniRef90_A0A1C1ZET0	0.673175	0.0537291	1.9451e-07	8.32508e-05	12	5
UniRef90_A0A2S1ERW5	0.187904	0.0150027	1.95154e-07	8.34575e-05	12	3
UniRef90_N2A3P8	0.573577	0.0458046	1.95512e-07	8.35415e-05	12	4
UniRef90_A0A073K279	0.575099	0.0459608	1.96909e-07	8.38962e-05	12	5
UniRef90_R9WJ68	0.50472	0.0403337	1.96796e-07	8.38962e-05	12	5
UniRef90_N2AKR7	0.655935	0.0524167	1.96756e-07	8.38962e-05	12	4
UniRef90_N1ZY15	0.555178	0.0443706	1.96988e-07	8.38962e-05	12	4
UniRef90_F8DQ67	0.651986	0.052153	1.98616e-07	8.45201e-05	12	6
UniRef90_A5VJG4	0.49581	0.0396689	1.99019e-07	8.46224e-05	12	5
UniRef90_F8KC70	0.527296	0.0422074	1.99884e-07	8.49207e-05	12	5
UniRef90_A0A1C1ZUZ9	0.622071	0.0498032	2.00244e-07	8.50042e-05	12	5
UniRef90_W6RTU1	0.175409	0.0140476	2.00828e-07	8.51824e-05	12	3
UniRef90_C2EU61	0.562072	0.0450211	2.01151e-07	8.52494e-05	12	5
UniRef90_A0A0X1TM92	0.179726	0.0143999	2.01698e-07	8.54117e-05	12	3
UniRef90_A0A0X1TK24	0.160928	0.0128997	2.02578e-07	8.57145e-05	12	3
UniRef90_A0A073JNI5	0.520024	0.041691	2.02881e-07	8.57729e-05	12	5
UniRef90_A0A173ZI63	0.161685	0.01297	2.03985e-07	8.61694e-05	12	3
UniRef90_A0A1X8VB61	0.386305	0.0309911	2.04158e-07	8.61721e-05	12	4
UniRef90_A0A1X8VAB9	0.461405	0.0370238	2.04568e-07	8.62753e-05	12	5
UniRef90_A5VHK1	0.570952	0.0458282	2.05167e-07	8.64578e-05	12	5
UniRef90_D4W6E6	0.488222	0.0392036	2.05951e-07	8.65073e-05	12	4
UniRef90_S5NSS5	0.408593	0.0328069	2.05796e-07	8.65073e-05	12	4
UniRef90_U1Y7I1	0.190292	0.0152799	2.05914e-07	8.65073e-05	12	3
UniRef90_D4W2V5	0.176859	0.0141982	2.05491e-07	8.65073e-05	12	3
UniRef90_S5NF62	0.62943	0.0505857	2.07621e-07	8.68634e-05	12	5
UniRef90_A7LND7	0.523204	0.0420589	2.08104e-07	8.68634e-05	12	5
UniRef90_F8DLP5	0.506262	0.0406758	2.07084e-07	8.68634e-05	12	5
UniRef90_A0A1C1Z6D4	0.463844	0.0372878	2.08138e-07	8.68634e-05	12	5
UniRef90_N2AJM9	0.594117	0.0477531	2.07843e-07	8.68634e-05	12	4
UniRef90_N2AHG5	0.58498	0.0470249	2.08104e-07	8.68634e-05	12	4
UniRef90_A0A0R1XNG8	0.533284	0.0428521	2.07321e-07	8.68634e-05	12	4
UniRef90_A0A0U5F5U6	0.421843	0.0338942	2.07142e-07	8.68634e-05	12	4
UniRef90_F8DM02	0.603927	0.0485587	2.08538e-07	8.69605e-05	12	5
UniRef90_A0A0U5KH58	0.607222	0.048864	2.10171e-07	8.7571e-05	12	5
UniRef90_A0A143Q0S0	0.50902	0.0409794	2.1104e-07	8.78629e-05	12	5
UniRef90_F8DPN6	0.495734	0.0399493	2.13019e-07	8.86157e-05	12	5
UniRef90_N1ZXZ2	0.5747	0.0463314	2.13827e-07	8.88803e-05	12	4
UniRef90_A0A0U5F4T7	0.567279	0.0457793	2.15873e-07	8.96592e-05	12	5
UniRef90_A0A1Y4P580	0.601077	0.0485263	2.16688e-07	8.98959e-05	12	5
UniRef90_A0A073JRL1	0.170887	0.0137968	2.16789e-07	8.98959e-05	12	3
UniRef90_N1ZZT8	0.633083	0.0511225	2.17184e-07	8.99854e-05	12	4
UniRef90_N2A5F2	0.1766	0.0142622	2.17386e-07	8.99854e-05	12	3
UniRef90_A0A256MEM2	0.17375	0.0140339	2.17663e-07	8.99854e-05	12	3
UniRef90_R9WJS8	0.16902	0.0136521	2.17699e-07	8.99854e-05	12	3
UniRef90_A0A1C2G9T7	0.174151	0.0140725	2.1858e-07	9.02777e-05	12	3
UniRef90_A0A0S4NQ12	0.663517	0.0536337	2.19241e-07	9.03714e-05	12	5
UniRef90_Q2F7N0	0.551188	0.0445515	2.19129e-07	9.03714e-05	12	5
UniRef90_N2AK96	0.581001	0.0469657	2.19329e-07	9.03714e-05	12	4
UniRef90_A0A073JNL2	0.471004	0.0380964	2.20548e-07	9.08016e-05	12	5
UniRef90_A0A0R1Y3W5	0.553717	0.044809	2.21596e-07	9.11608e-05	12	4
UniRef90_N1ZMD6	0.558511	0.0452109	2.22242e-07	9.13541e-05	12	4
UniRef90_R9WI24	0.617992	0.0500434	2.22979e-07	9.15849e-05	12	5
UniRef90_F8DQI0	0.438798	0.035537	2.23236e-07	9.16179e-05	12	5
UniRef90_S5N6X6	0.710643	0.057572	2.23932e-07	9.16409e-05	12	5
UniRef90_N2AN40	0.624412	0.0505877	2.23998e-07	9.16409e-05	12	4
UniRef90_S5NVL5	0.488697	0.0395836	2.23524e-07	9.16409e-05	12	4
UniRef90_A0A0R1Y0F8	0.481934	0.0390406	2.23779e-07	9.16409e-05	12	4
UniRef90_A0A0R1XMD2	0.572654	0.0464004	2.24271e-07	9.168e-05	12	4
UniRef90_C2E6C2	0.482392	0.0390988	2.24923e-07	9.18023e-05	12	4
UniRef90_UPI00074D59A9	0.443149	0.035918	2.24923e-07	9.18023e-05	12	4
UniRef90_A0A1C1ZJF1	0.53024	0.0429883	2.25485e-07	9.19593e-05	12	5
UniRef90_A0A2S1EQC0	0.606286	0.0491637	2.25921e-07	9.2043e-05	12	5
UniRef90_A0A317G8P6	0.573788	0.0465311	2.26045e-07	9.2043e-05	12	5
UniRef90_A5VHK2	0.606933	0.0492268	2.26382e-07	9.21079e-05	12	5
UniRef90_A0A0R1XRY8	0.569758	0.0462246	2.26983e-07	9.22802e-05	12	4
UniRef90_N2AMR6	0.503564	0.0408779	2.28223e-07	9.27117e-05	12	4
UniRef90_D4W6Q3	0.190426	0.0154616	2.28684e-07	9.28264e-05	12	3
UniRef90_N2ADP8	0.601511	0.0488715	2.30105e-07	9.30175e-05	12	4
UniRef90_A0A0R1XTQ6	0.501491	0.0407405	2.29862e-07	9.30175e-05	12	4
UniRef90_N2A3N4	0.494184	0.0401505	2.30058e-07	9.30175e-05	12	4
UniRef90_A5VLK2	0.40995	0.0333036	2.29848e-07	9.30175e-05	12	4
UniRef90_F8DRC6	0.313162	0.0254406	2.29838e-07	9.30175e-05	12	4
UniRef90_B3XNF6	0.179553	0.0145891	2.3023e-07	9.30175e-05	12	3
UniRef90_E4SK75	0.56755	0.046156	2.32176e-07	9.37309e-05	12	4
UniRef90_A0A174U9Q0	0.177518	0.014439	2.32536e-07	9.38032e-05	12	3
UniRef90_N1ZSC7	0.562156	0.045742	2.33359e-07	9.40035e-05	12	4
UniRef90_A0A1C2G5N3	0.178622	0.0145345	2.33394e-07	9.40035e-05	12	3
UniRef90_A0A173WB64	0.17853	0.0145297	2.33803e-07	9.4095e-05	12	3
UniRef90_A5VLI7	0.53256	0.0433553	2.34453e-07	9.42145e-05	12	5
UniRef90_A0A256VLG2	0.173824	0.014151	2.34463e-07	9.42145e-05	12	3
UniRef90_N2ADY9	0.561306	0.0457016	2.34747e-07	9.42558e-05	12	4
UniRef90_A0A0U5JVX3	0.50127	0.0408421	2.36307e-07	9.46626e-05	12	5
UniRef90_S5N6W6	0.423735	0.0345204	2.36025e-07	9.46626e-05	12	4
UniRef90_A0A174BIH8	0.421003	0.0343016	2.36266e-07	9.46626e-05	12	4
UniRef90_N2AEK5	0.522288	0.0425875	2.38034e-07	9.52806e-05	12	4
UniRef90_A5VHM0	0.596433	0.0486515	2.38877e-07	9.53975e-05	12	5
UniRef90_A0A0U5JSJ3	0.59437	0.0484778	2.38626e-07	9.53975e-05	12	5
UniRef90_A0A1V4FK98	0.184329	0.0150351	2.38765e-07	9.53975e-05	12	3
UniRef90_A0A0U5KLB7	0.562595	0.045927	2.40633e-07	9.59512e-05	12	5
UniRef90_A0A081NRN8	0.382785	0.0312476	2.40577e-07	9.59512e-05	12	4
UniRef90_B3XNI3	0.704059	0.0574801	2.40823e-07	9.59534e-05	12	5
UniRef90_Q1KMT5	0.610593	0.0498713	2.41818e-07	9.6055e-05	12	5
UniRef90_Q74J95	0.604625	0.0493798	2.41633e-07	9.6055e-05	12	5
UniRef90_A0A2T5Q2J1	0.380661	0.0310892	2.4167e-07	9.6055e-05	12	4
UniRef90_A0A174SUJ8	0.164665	0.0134486	2.41702e-07	9.6055e-05	12	3
UniRef90_A0A173S857	0.185028	0.0151141	2.4206e-07	9.60775e-05	12	3
UniRef90_A5VIK0	0.416311	0.0340162	2.4271e-07	9.62617e-05	12	4
UniRef90_A5VHP1	0.535943	0.0438104	2.43717e-07	9.65876e-05	12	5
UniRef90_D4YTD7	0.486092	0.0397405	2.44013e-07	9.66309e-05	12	4
UniRef90_A0A1X8V9W8	0.64649	0.0528697	2.44703e-07	9.68303e-05	12	5
UniRef90_N1ZRQ4	0.4943	0.0404342	2.45305e-07	9.69947e-05	12	4
UniRef90_A0A317GG97	0.535149	0.0437927	2.46204e-07	9.72242e-05	12	5
UniRef90_Q74KF9	0.494172	0.0404404	2.4626e-07	9.72242e-05	12	5
UniRef90_A0A0U5JN51	0.461012	0.0377424	2.47224e-07	9.72349e-05	12	5
UniRef90_N2AKX7	0.557756	0.0456559	2.46881e-07	9.72349e-05	12	4
UniRef90_N1ZR52	0.53691	0.0439469	2.46738e-07	9.72349e-05	12	4
UniRef90_N2AA87	0.517597	0.0423733	2.47136e-07	9.72349e-05	12	4
UniRef90_A0A1M5Y8E0	0.318464	0.0260673	2.46783e-07	9.72349e-05	12	4
UniRef90_S5NCZ6	0.545165	0.0446437	2.47842e-07	9.74038e-05	12	5
UniRef90_N2A119	0.472523	0.0386981	2.48028e-07	9.74038e-05	12	4
UniRef90_A0A1C2G811	0.18567	0.0152106	2.4877e-07	9.76212e-05	12	3
UniRef90_Q74ID8	0.483875	0.0396451	2.49048e-07	9.76565e-05	12	5
UniRef90_D4W746	0.165762	0.0135844	2.49588e-07	9.77944e-05	12	3
UniRef90_F8DPE7	0.505365	0.0414285	2.50332e-07	9.8012e-05	12	5
UniRef90_F8DPD9	0.331433	0.0271773	2.50973e-07	9.8189e-05	12	4
UniRef90_R9WI38	0.637539	0.0523277	2.53235e-07	9.89246e-05	12	6
UniRef90_UPI000D6FC937	0.586897	0.0481689	2.53128e-07	9.89246e-05	12	5
UniRef90_C7XY04	0.183546	0.0150677	2.53667e-07	9.90145e-05	12	3
UniRef90_A0A2R7DS69	0.173128	0.0142135	2.53846e-07	9.90145e-05	12	3
UniRef90_F8DMT5	0.540557	0.044388	2.54337e-07	9.91314e-05	12	5
UniRef90_R9WES5	0.596119	0.0489579	2.54696e-07	9.9197e-05	12	5
UniRef90_A0A2S1EQ92	0.526924	0.0433464	2.58679e-07	0.000100673	12	5
UniRef90_V5P4J3	0.660233	0.0543508	2.60385e-07	0.000101185	12	6
UniRef90_A0A073JPN6	0.503715	0.0414656	2.60352e-07	0.000101185	12	5
UniRef90_A0A0U5JRQ0	0.5092	0.0419359	2.61458e-07	0.000101346	12	5
UniRef90_A0A0R1P8A6	0.599621	0.0493804	2.61342e-07	0.000101346	12	4
UniRef90_A0A0R1XZ66	0.51642	0.0425271	2.61257e-07	0.000101346	12	4
UniRef90_A0A1C1ZLB7	0.47443	0.0390744	2.61581e-07	0.000101346	12	4
UniRef90_F8DMT6	0.591378	0.0487139	2.61968e-07	0.00010142	12	5
UniRef90_B2G6L2	0.514175	0.0423952	2.64355e-07	0.000102192	12	5
UniRef90_A0A1C1Z6X5	0.517296	0.0426503	2.64223e-07	0.000102192	12	4
UniRef90_N2ARP1	0.615094	0.0507424	2.65637e-07	0.000102611	12	4
UniRef90_A0A1S9AE50	0.487829	0.0402475	2.65879e-07	0.000102628	12	5
UniRef90_Q74JP1	0.505383	0.0417181	2.67224e-07	0.00010299	12	5
UniRef90_N2AM52	0.648729	0.0535466	2.67016e-07	0.00010299	12	4
UniRef90_A0A1S9AP18	0.174669	0.0144196	2.6741e-07	0.00010299	12	3
UniRef90_A0A081KW69	0.537822	0.0444073	2.67871e-07	0.000102993	12	6
UniRef90_A0A1Y4NXJ3	0.523752	0.0432512	2.68202e-07	0.000102993	12	5
UniRef90_N2ADX0	0.579496	0.0478461	2.67758e-07	0.000102993	12	4
UniRef90_A0A347T9J2	0.192492	0.0158972	2.68411e-07	0.000102993	12	3
UniRef90_A0A173WWY0	0.179888	0.0148557	2.68307e-07	0.000102993	12	3
UniRef90_N2AGD1	0.583115	0.0481681	2.68975e-07	0.000103133	12	4
UniRef90_C2ESP2	0.590719	0.0488019	2.69267e-07	0.000103169	12	6
UniRef90_A0A347T7U4	0.5612	0.0463766	2.70004e-07	0.000103299	12	5
UniRef90_A5VJE6	0.471864	0.0389937	2.69978e-07	0.000103299	12	5
UniRef90_A0A174C912	0.178411	0.014748	2.70766e-07	0.000103514	12	3
UniRef90_A0A0R1XZA0	0.581985	0.0481417	2.72521e-07	0.000104109	12	4
UniRef90_B3XP11	0.596633	0.0493636	2.73054e-07	0.000104159	12	5
UniRef90_B3XP84	0.310642	0.0257016	2.73052e-07	0.000104159	12	4
UniRef90_N2ASM2	0.601996	0.0498182	2.73613e-07	0.000104295	12	4
UniRef90_P62053	0.477552	0.0395279	2.74139e-07	0.000104343	12	5
UniRef90_A0A0X8G312	0.192813	0.0159584	2.7397e-07	0.000104343	12	3
UniRef90_S5N4L8	0.481801	0.0398836	2.74397e-07	0.000104365	12	4
UniRef90_A0A0R1Y3I6	0.626209	0.051867	2.75862e-07	0.000104615	12	4
UniRef90_C2EMF1	0.558119	0.0462221	2.75571e-07	0.000104615	12	4
UniRef90_N2ANW4	0.551881	0.0457178	2.76265e-07	0.000104615	12	4
UniRef90_N2AJN2	0.506616	0.0419635	2.75989e-07	0.000104615	12	4
UniRef90_C2E331	0.425915	0.0352824	2.76246e-07	0.000104615	12	4
UniRef90_D4W3Q7	0.190357	0.0157681	2.76097e-07	0.000104615	12	3
UniRef90_N1ZV94	0.635732	0.0526754	2.76833e-07	0.000104643	12	4
UniRef90_A0A0R1XRD9	0.619613	0.051342	2.76944e-07	0.000104643	12	4
UniRef90_A0A174AJH5	0.179496	0.0148717	2.76674e-07	0.000104643	12	3
UniRef90_A0A0U5JLY1	0.578425	0.0479668	2.78999e-07	0.000105248	12	6
UniRef90_B3XLN8	0.487181	0.0404026	2.79152e-07	0.000105248	12	5
UniRef90_A0A173XAH0	0.18637	0.0154559	2.79149e-07	0.000105248	12	3
UniRef90_A0A1Y4P744	0.61512	0.0510485	2.80995e-07	0.000105866	12	5
UniRef90_A5VHS3	0.547042	0.0454066	2.81458e-07	0.000105956	12	5
UniRef90_N2ARJ3	0.58419	0.0484935	2.81642e-07	0.000105956	12	4
UniRef90_S5NCC7	0.54278	0.0450679	2.82341e-07	0.000105975	12	5
UniRef90_A0A0R1XQ49	0.528745	0.0439053	2.82509e-07	0.000105975	12	4
UniRef90_A0A0R1XQ37	0.526689	0.0437323	2.82373e-07	0.000105975	12	4
UniRef90_UPI000A2D1AEA	0.429419	0.0356496	2.81916e-07	0.000105975	12	4
UniRef90_F8KE45	0.559211	0.0464403	2.82803e-07	0.000106008	12	5
UniRef90_D0R3U1	0.524702	0.0436177	2.85457e-07	0.000106758	12	6
UniRef90_A0A2S1EQU6	0.52723	0.0438306	2.85626e-07	0.000106758	12	5
UniRef90_A0A073K3V7	0.478074	0.0397383	2.85236e-07	0.000106758	12	5
UniRef90_A0A174SKT0	0.175047	0.0145503	2.8524e-07	0.000106758	12	3
UniRef90_B3XPJ6	0.493236	0.0410155	2.86341e-07	0.000106949	12	5
UniRef90_S5NV63	0.51157	0.0425453	2.86673e-07	0.000106996	12	5
UniRef90_F8DQG1	0.523101	0.0435123	2.87167e-07	0.000107103	12	5
UniRef90_A5VIT4	0.494431	0.0411391	2.8793e-07	0.000107233	12	5
UniRef90_A0A256V794	0.386877	0.0321876	2.87728e-07	0.000107233	12	4
UniRef90_A0A0S4NPM6	0.644568	0.0536555	2.89158e-07	0.000107614	12	5
UniRef90_A0A174US53	0.518484	0.0431724	2.89945e-07	0.000107829	12	4
UniRef90_A0A2S1ENK2	0.640067	0.0533034	2.90313e-07	0.000107852	12	5
UniRef90_A0A0X1TKF3	0.165641	0.0137947	2.90421e-07	0.000107852	12	3
UniRef90_A0A0R1Y5C4	0.561259	0.0467462	2.90651e-07	0.00010786	12	4
UniRef90_F8DQY2	0.492631	0.0410354	2.9099e-07	0.000107908	12	5
UniRef90_A0A173TAI9	0.163482	0.0136196	2.91347e-07	0.000107964	12	3
UniRef90_A0A0R1Y0M9	0.54136	0.0451143	2.92198e-07	0.000108132	12	4
UniRef90_A0A0R1Y3H8	0.451763	0.037648	2.92217e-07	0.000108132	12	4
UniRef90_A0A174D6M0	0.179988	0.0150228	2.96534e-07	0.000109651	12	3
UniRef90_A0A0U5D4L8	0.610141	0.0509568	2.98235e-07	0.000109877	12	5
UniRef90_S5NCQ4	0.539052	0.0450291	2.98821e-07	0.000109877	12	5
UniRef90_A0A0U5F260	0.519633	0.0434087	2.98933e-07	0.000109877	12	5
UniRef90_F8KFJ7	0.437197	0.0365173	2.98549e-07	0.000109877	12	5
UniRef90_N2A2R6	0.546813	0.0456812	2.99049e-07	0.000109877	12	4
UniRef90_A0A317G6A8	0.522221	0.0436222	2.98754e-07	0.000109877	12	4
UniRef90_N2A994	0.497741	0.0415673	2.98082e-07	0.000109877	12	4
UniRef90_N2ADP3	0.453481	0.0378816	2.98865e-07	0.000109877	12	4
UniRef90_A0A2S1EQZ9	0.190722	0.0159242	2.97481e-07	0.000109877	12	3
UniRef90_Q74HS3	0.627959	0.052488	3.00544e-07	0.00011027	12	6
UniRef90_S5NAT8	0.544734	0.0455296	3.00418e-07	0.00011027	12	5
UniRef90_A0A347T9S4	0.594773	0.0497281	3.01336e-07	0.000110483	12	5
UniRef90_F8KGN9	0.522675	0.0437244	3.0292e-07	0.000110985	12	5
UniRef90_A0A2S1EP85	0.714571	0.0597893	3.03483e-07	0.000111113	12	6
UniRef90_F8KDT4	0.376588	0.0315178	3.04215e-07	0.000111302	12	4
UniRef90_A0A355X2L3	0.512562	0.0429077	3.04865e-07	0.000111462	12	4
UniRef90_A0A256VLV1	0.598931	0.0501519	3.05673e-07	0.000111678	12	6
UniRef90_B3XM97	0.510249	0.0427349	3.0627e-07	0.000111739	12	5
UniRef90_A0A0U5JTK7	0.323375	0.0270836	3.06261e-07	0.000111739	12	4
UniRef90_N1ZPN3	0.53397	0.0447514	3.08196e-07	0.000112363	12	4
UniRef90_C2E6J5	0.572504	0.0480046	3.09625e-07	0.000112805	12	5
UniRef90_N2ASM9	0.621695	0.0521332	3.09845e-07	0.000112806	12	4
UniRef90_N2AHI1	0.626531	0.0525539	3.10686e-07	0.000113033	12	4
UniRef90_N2ABH5	0.484641	0.0406575	3.11074e-07	0.000113094	12	4
UniRef90_C2EU87	0.383427	0.0321712	3.11511e-07	0.000113174	12	4
UniRef90_A0A0R1XPB5	0.517536	0.0434292	3.11895e-07	0.000113234	12	4
UniRef90_A0A2R7DVY6	0.406575	0.0341317	3.13088e-07	0.000113509	12	4
UniRef90_A0A173U193	0.159799	0.013415	3.13076e-07	0.000113509	12	3
UniRef90_A0A073JP85	0.668838	0.0561736	3.144e-07	0.000113825	12	5
UniRef90_A0A081NMZ7	0.462747	0.038862	3.14195e-07	0.000113825	12	5
UniRef90_A0A2R7DQK5	0.388313	0.0326218	3.15183e-07	0.000113985	12	4
UniRef90_S5NYK1	0.177001	0.0148702	3.15279e-07	0.000113985	12	3
UniRef90_A5VKW4	0.578308	0.0486244	3.17709e-07	0.000114624	12	5
UniRef90_A0A2S1ETS9	0.534379	0.0449283	3.17535e-07	0.000114624	12	5
UniRef90_A0A174TV95	0.187563	0.0157691	3.1746e-07	0.000114624	12	3
UniRef90_A0A0S4NMJ3	0.369323	0.0310637	3.18753e-07	0.000114921	12	4
UniRef90_A0A2R7DZM1	0.59835	0.0503356	3.19252e-07	0.000115021	12	5
UniRef90_A0A1Y3TYI7	0.379589	0.0319411	3.20067e-07	0.000115234	12	4
UniRef90_S5NB22	0.542876	0.0456895	3.20613e-07	0.000115271	12	6
UniRef90_D4W7Q1	0.189925	0.0159834	3.20421e-07	0.000115271	12	3
UniRef90_R9WH14	0.528864	0.0445357	3.22337e-07	0.000115739	12	5
UniRef90_A0A0X1TK66	0.17056	0.014363	3.2236e-07	0.000115739	12	3
UniRef90_A0A1B7LT87	0.562733	0.0473994	3.23078e-07	0.000115916	12	5
UniRef90_A0A0S4NKL6	0.482891	0.0406818	3.23643e-07	0.000116012	12	5
UniRef90_A0A355X3E5	0.513526	0.0432648	3.23791e-07	0.000116012	12	4
UniRef90_A0A1G8P9U2	0.355383	0.0299492	3.24603e-07	0.000116223	12	4
UniRef90_A5VMN9	0.637357	0.0537209	3.25112e-07	0.000116325	12	7
UniRef90_A0A098QVB7	0.606395	0.0511195	3.25605e-07	0.000116376	12	5
UniRef90_A0A173RWS5	0.163971	0.0138233	3.25705e-07	0.000116376	12	3
UniRef90_A0A1Y2UFX9	0.616538	0.0520026	3.27261e-07	0.00011676	12	5
UniRef90_A0A0R1Y1B3	0.642966	0.054239	3.27677e-07	0.00011676	12	4
UniRef90_N2A2T6	0.449311	0.0379018	3.27595e-07	0.00011676	12	4
UniRef90_A0A244CBI7	0.430688	0.0363238	3.27006e-07	0.00011676	12	4
UniRef90_A0A317GEZ7	0.319424	0.0269528	3.28476e-07	0.000116964	12	4
UniRef90_A5VID8	0.652478	0.0550775	3.29696e-07	0.000117315	12	5
UniRef90_C8P608	0.433414	0.0365883	3.29915e-07	0.000117315	12	4
UniRef90_UPI0008388EB9	0.440402	0.037184	3.30403e-07	0.000117409	12	5
UniRef90_A0A1Y4P5X8	0.373659	0.0315661	3.32114e-07	0.000117855	12	4
UniRef90_A0A174J3G2	0.361147	0.0305075	3.31942e-07	0.000117855	12	4
UniRef90_F8DR69	0.65231	0.055123	3.33072e-07	0.000118115	12	5
UniRef90_A0A0U5FEH0	0.615456	0.0520261	3.3412e-07	0.000118136	12	5
UniRef90_A0A0U5JTF8	0.505972	0.0427732	3.34272e-07	0.000118136	12	5
UniRef90_B3XR75	0.498612	0.042141	3.33523e-07	0.000118136	12	5
UniRef90_A0A0R1XT89	0.550187	0.0465074	3.34028e-07	0.000118136	12	4
UniRef90_A0A174B6H0	0.188175	0.0159076	3.3425e-07	0.000118136	12	3
UniRef90_A5VMP8	0.54205	0.0458358	3.3514e-07	0.000118363	12	5
UniRef90_Q5FJC0	0.555151	0.0469711	3.36989e-07	0.000118773	12	6
UniRef90_N2AA94	0.61584	0.0521043	3.36881e-07	0.000118773	12	4
UniRef90_R7HUW5	0.324984	0.0274947	3.36747e-07	0.000118773	12	4
UniRef90_A0A137PLB5	0.314015	0.0265988	3.40588e-07	0.000119879	12	4
UniRef90_A0A1X8VC46	0.189242	0.0160292	3.40469e-07	0.000119879	12	3
UniRef90_N2AN44	0.560024	0.0474485	3.4136e-07	0.000120069	12	4
UniRef90_A0A174B2F5	0.180047	0.0152579	3.42043e-07	0.000120228	12	3
UniRef90_C2EUP0	0.544235	0.0461246	3.42317e-07	0.000120243	12	5
UniRef90_F8KBS0	0.627568	0.0532163	3.44079e-07	0.00012078	12	5
UniRef90_N2AS32	0.56787	0.0481629	3.44671e-07	0.000120853	12	4
UniRef90_D4W2P5	0.195345	0.0165682	3.44751e-07	0.000120853	12	3
UniRef90_F8DQW2	0.469226	0.0398079	3.45594e-07	0.000121052	12	5
UniRef90_N2A070	0.482976	0.0409768	3.45785e-07	0.000121052	12	4
UniRef90_A5VJG2	0.701966	0.0596302	3.49831e-07	0.000122386	12	5
UniRef90_A5VI09	0.445718	0.0378688	3.50364e-07	0.00012249	12	5
UniRef90_Q4JLN0	0.542597	0.0461369	3.53018e-07	0.000123334	12	5
UniRef90_A5VLI1	0.568613	0.0483571	3.53578e-07	0.000123336	12	5
UniRef90_A0A0R1Y492	0.603846	0.0513574	3.53831e-07	0.000123336	12	4
UniRef90_N2A3A8	0.499733	0.0425044	3.53974e-07	0.000123336	12	4
UniRef90_N2A929	0.432004	0.0367398	3.53616e-07	0.000123336	12	4
UniRef90_R9WIL2	0.559205	0.0475672	3.54286e-07	0.000123362	12	5
UniRef90_F8DL67	0.480886	0.0409181	3.55332e-07	0.000123644	12	5
UniRef90_A0A1Q9JNE2	0.183104	0.015584	3.56167e-07	0.000123851	12	3
UniRef90_F8DRU8	0.486364	0.041402	3.56773e-07	0.000123979	12	5
UniRef90_F8DPH4	0.575597	0.0490031	3.57117e-07	0.000124015	12	5
UniRef90_S5N9Z0	0.454827	0.0387385	3.58595e-07	0.000124446	12	5
UniRef90_F8DRQ0	0.331824	0.0282658	3.59038e-07	0.000124516	12	4
UniRef90_F8DQR6	0.181265	0.0154483	3.60695e-07	0.000125007	12	3
UniRef90_A0A0U5JTZ4	0.17929	0.0152814	3.60994e-07	0.000125027	12	3
UniRef90_A0A0R1XQC0	0.461714	0.0393584	3.61459e-07	0.000125105	12	4
UniRef90_S5N6Y9	0.588242	0.0501542	3.62136e-07	0.000125256	12	5
UniRef90_A0A0X1TIT4	0.189587	0.0161656	3.62385e-07	0.000125258	12	3
UniRef90_F8DQH2	0.586666	0.0500518	3.64318e-07	0.000125843	12	5
UniRef90_A0A0R1XWW3	0.552057	0.0471124	3.65282e-07	0.000126052	12	4
UniRef90_S5NBX6	0.18643	0.0159116	3.65653e-07	0.000126052	12	3
UniRef90_A0A0X1TJZ2	0.162786	0.0138931	3.65511e-07	0.000126052	12	3
UniRef90_A0A0U5JMN7	0.605431	0.0516828	3.66303e-07	0.000126192	12	5
UniRef90_Q562J5	0.436363	0.0372557	3.66808e-07	0.000126283	12	5
UniRef90_A0A0U5F0D9	0.549694	0.0469356	3.67102e-07	0.0001263	12	5
UniRef90_UPI00080CA35C	0.58708	0.0501465	3.68382e-07	0.000126501	12	4
UniRef90_N2AI40	0.576263	0.0492163	3.6795e-07	0.000126501	12	4
UniRef90_Q5FM94	0.468815	0.0400451	3.68418e-07	0.000126501	12	4
UniRef90_A0A0R2HZN5	0.460861	0.0393821	3.69867e-07	0.000126915	12	4
UniRef90_A0A0X1TKZ2	0.194815	0.0166544	3.71291e-07	0.000127247	12	3
UniRef90_A0A2S1EU87	0.175415	0.0149961	3.71326e-07	0.000127247	12	3
UniRef90_A0A1C2GA54	0.795486	0.0680502	3.7362e-07	0.000127836	12	5
UniRef90_A0A0U5FFS7	0.445729	0.0381302	3.73627e-07	0.000127836	12	5
UniRef90_N2AF64	0.593643	0.0507859	3.73782e-07	0.000127836	12	4
UniRef90_A0A0X8G1X7	0.169059	0.0144655	3.74398e-07	0.000127962	12	3
UniRef90_V5P0P9	0.585112	0.0500915	3.76275e-07	0.000128464	12	6
UniRef90_F8DKX4	0.746162	0.0638806	3.7636e-07	0.000128464	12	5
UniRef90_B3XNB1	0.557239	0.0477105	3.76655e-07	0.00012848	12	5
UniRef90_Q74LU2	0.516223	0.0442153	3.77985e-07	0.0001285	12	4
UniRef90_A0A0R1XWB8	0.500854	0.0428986	3.77957e-07	0.0001285	12	4
UniRef90_D0R3Z9	0.464487	0.0397825	3.77843e-07	0.0001285	12	4
UniRef90_A0A0U5JTE6	0.418638	0.0358575	3.78034e-07	0.0001285	12	4
UniRef90_A0A173WU97	0.181248	0.0155251	3.782e-07	0.0001285	12	3
UniRef90_A0A244CB38	0.161988	0.0138711	3.77096e-07	0.0001285	12	3
UniRef90_A0A2R7DT15	0.702925	0.0602242	3.79024e-07	0.000128696	12	5
UniRef90_B3XRP2	0.689416	0.0591062	3.81396e-07	0.000128929	12	7
UniRef90_A0A0U5JTX1	0.713082	0.0611351	3.81391e-07	0.000128929	12	5
UniRef90_N1ZW24	0.50122	0.0429711	3.81372e-07	0.000128929	12	4
UniRef90_A0A0R1XR51	0.471358	0.0404174	3.81944e-07	0.000128929	12	4
UniRef90_R9WFC2	0.387599	0.0332272	3.81054e-07	0.000128929	12	4
UniRef90_A0A1H9Y4U4	0.194375	0.0166629	3.81058e-07	0.000128929	12	3
UniRef90_W1FVL5	0.193932	0.0166261	3.81311e-07	0.000128929	12	3
UniRef90_A0A174D4T1	0.191726	0.0164386	3.8166e-07	0.000128929	12	3
UniRef90_A0A0X1TKP7	0.174606	0.0149714	3.81816e-07	0.000128929	12	3
UniRef90_A0A350X3L7	0.167553	0.0143707	3.82833e-07	0.000129145	12	3
UniRef90_N2ASE3	0.602073	0.0516603	3.84341e-07	0.000129569	12	4
UniRef90_A0A256VK88	0.707578	0.0607296	3.8532e-07	0.000129616	12	6
UniRef90_F8DM32	0.497054	0.0426631	3.85512e-07	0.000129616	12	5
UniRef90_A0A0R1XZ75	0.505363	0.0433772	3.85583e-07	0.000129616	12	4
UniRef90_V5P694	0.194084	0.0166552	3.84773e-07	0.000129616	12	3
UniRef90_A0A173ZF35	0.166132	0.0142603	3.85727e-07	0.000129616	12	3
UniRef90_A0A2K4ZEE1	0.783835	0.0673145	3.87473e-07	0.000130118	12	5
UniRef90_A5VIW7	0.632647	0.0543503	3.88785e-07	0.0001302	12	6
UniRef90_A0A1Y4PC41	0.546222	0.0469189	3.88264e-07	0.0001302	12	5
UniRef90_Q5FI54	0.574433	0.0493518	3.88971e-07	0.0001302	12	4
UniRef90_A0A0R1XUE7	0.49498	0.042525	3.88915e-07	0.0001302	12	4
UniRef90_A0A174BK58	0.186395	0.0160099	3.88055e-07	0.0001302	12	3
UniRef90_A0A350WZY9	0.195347	0.0167911	3.90731e-07	0.000130705	12	3
UniRef90_D0R2Y4	0.196845	0.0169243	3.91708e-07	0.000130947	12	3
UniRef90_A5VKQ8	0.452165	0.0388811	3.92157e-07	0.000131013	12	4
UniRef90_A0A0U0XS36	0.604097	0.0519647	3.93516e-07	0.000131383	12	4
UniRef90_A5VKU8	0.55998	0.0481828	3.94522e-07	0.000131634	12	5
UniRef90_A0A256M784	0.330749	0.0284747	3.96571e-07	0.000132233	12	4
UniRef90_A0A2S1ENT9	0.431524	0.0371572	3.97235e-07	0.000132369	12	5
UniRef90_A0A0U5JFR7	0.693426	0.0597236	3.98163e-07	0.000132593	12	6
UniRef90_F8DML8	0.634523	0.054677	3.99986e-07	0.000133115	12	6
UniRef90_A0A2T5Q273	0.531196	0.0457961	4.01858e-07	0.000133652	12	5
UniRef90_A0A079YU07	0.451158	0.0389143	4.03656e-07	0.000134164	12	4
UniRef90_S5N6K4	0.495157	0.0427181	4.04417e-07	0.000134245	12	4
UniRef90_A0A174VIF6	0.182882	0.0157774	4.04378e-07	0.000134245	12	3
UniRef90_F8DKT0	0.557337	0.0480987	4.05699e-07	0.000134413	12	5
UniRef90_UPI000A2DDCA3	0.549648	0.047434	4.05609e-07	0.000134413	12	5
UniRef90_F2M2E8	0.459307	0.0396366	4.05502e-07	0.000134413	12	4
UniRef90_D4W2X0	0.161799	0.0139672	4.06751e-07	0.000134675	12	3
UniRef90_Q2F7N3	0.52695	0.0454955	4.07309e-07	0.000134689	12	5
UniRef90_D4W764	0.186309	0.0160845	4.07093e-07	0.000134689	12	3
UniRef90_C7XU06	0.616953	0.0533034	4.09984e-07	0.000135271	12	5
UniRef90_A4L2T9	0.520888	0.044998	4.09506e-07	0.000135271	12	5
UniRef90_A0A0L8AR49	0.394257	0.0340641	4.10113e-07	0.000135271	12	4
UniRef90_A5VIT9	0.328722	0.0283988	4.09707e-07	0.000135271	12	4
UniRef90_D0R2P1	0.516755	0.044654	4.10628e-07	0.000135355	12	6
UniRef90_A0A174R0W0	0.181204	0.0156613	4.11374e-07	0.000135515	12	3
UniRef90_C2EUQ4	0.614966	0.053159	4.11957e-07	0.000135617	12	5
UniRef90_N2ADD9	0.550449	0.047585	4.12208e-07	0.000135617	12	4
UniRef90_F8KF87	0.570432	0.0493249	4.13176e-07	0.000135743	12	5
UniRef90_F8DRS1	0.380091	0.0328666	4.13209e-07	0.000135743	12	4
UniRef90_A0A174TT32	0.190078	0.0164368	4.13375e-07	0.000135743	12	3
UniRef90_A0A081NRV1	0.521106	0.0450703	4.14085e-07	0.000135891	12	5
UniRef90_A0A1X8VBQ9	0.536717	0.0464415	4.15842e-07	0.000136258	12	5
UniRef90_A0A0R1XS58	0.551432	0.0477112	4.15549e-07	0.000136258	12	4
UniRef90_UPI000A2E26D4	0.193618	0.0167542	4.15992e-07	0.000136258	12	3
UniRef90_A0A133PCH8	0.372307	0.0322195	4.16351e-07	0.00013629	12	4
UniRef90_A0A1C2G5W6	0.65201	0.0564291	4.16635e-07	0.000136297	12	5
UniRef90_UPI000B9864D1	0.419731	0.0363341	4.17475e-07	0.000136486	12	4
UniRef90_A0A1C1ZCP5	0.413494	0.0357988	4.17977e-07	0.000136564	12	5
UniRef90_B3XPS7	0.599301	0.0519074	4.1965e-07	0.000137024	12	6
UniRef90_N2AHN8	0.524784	0.0454641	4.20589e-07	0.000137158	12	4
UniRef90_N1ZUG3	0.520209	0.0450652	4.20367e-07	0.000137158	12	4
UniRef90_A0A2R7DZG6	0.578029	0.0500916	4.21751e-07	0.0001374	12	5
UniRef90_F8DMB3	0.557526	0.0483162	4.2186e-07	0.0001374	12	5
UniRef90_N2AHH5	0.645854	0.055977	4.22295e-07	0.000137455	12	4
UniRef90_B3XN58	0.432542	0.0374932	4.22739e-07	0.000137514	12	4
UniRef90_Q74IL1	0.50448	0.0437601	4.25574e-07	0.000138263	12	5
UniRef90_S5N6R8	0.452296	0.0392316	4.25375e-07	0.000138263	12	5
UniRef90_A0A073JNF0	0.607978	0.0527415	4.25853e-07	0.000138267	12	5
UniRef90_A0A0U5F8F7	0.496189	0.0430476	4.26196e-07	0.000138292	12	5
UniRef90_A0A2M9NLN6	0.60513	0.0525184	4.27673e-07	0.000138581	12	5
UniRef90_A0A0R1XWY5	0.354816	0.0307949	4.27786e-07	0.000138581	12	4
UniRef90_A0A173YFK3	0.182369	0.0158284	4.2789e-07	0.000138581	12	3
UniRef90_UPI000C1607B9	0.182321	0.0158274	4.28699e-07	0.000138757	12	3
UniRef90_C2EQ31	0.51885	0.0450517	4.2958e-07	0.000138955	12	4
UniRef90_W1JB39	0.689579	0.0599131	4.32075e-07	0.000139675	12	5
UniRef90_A5VLY3	0.547631	0.0475969	4.33497e-07	0.000140048	12	5
UniRef90_A0A0R1PEE5	0.363893	0.0316338	4.34309e-07	0.000140223	12	4
UniRef90_A0A256MD60	0.635117	0.0552421	4.36549e-07	0.000140859	12	6
UniRef90_V5P4G1	0.604752	0.0526482	4.40233e-07	0.000141823	12	5
UniRef90_A0A355X205	0.549488	0.0478385	4.40359e-07	0.000141823	12	4
UniRef90_A0A1C2GBE1	0.407624	0.0354878	4.40353e-07	0.000141823	12	4
UniRef90_A5VIP9	0.596049	0.0518983	4.40846e-07	0.000141892	12	5
UniRef90_A0A137PPA2	0.583279	0.0508081	4.4261e-07	0.00014191	12	5
UniRef90_N1ZXY2	0.609715	0.0531105	4.42584e-07	0.00014191	12	4
UniRef90_N2AFE9	0.506937	0.0441507	4.41912e-07	0.00014191	12	4
UniRef90_A0A1C1ZID4	0.395865	0.0344845	4.42797e-07	0.00014191	12	4
UniRef90_D0R429	0.386829	0.0336951	4.42521e-07	0.00014191	12	4
UniRef90_D4W5H6	0.189513	0.0165068	4.4232e-07	0.00014191	12	3
UniRef90_A0A174CYD6	0.183463	0.0159818	4.42815e-07	0.00014191	12	3
UniRef90_A0A2P1E4U4	0.440176	0.0383513	4.43545e-07	0.000142056	12	4
UniRef90_A0A0R1XPQ0	0.524634	0.0457348	4.45801e-07	0.00014249	12	4
UniRef90_N1ZTW7	0.495329	0.0431845	4.46228e-07	0.00014249	12	4
UniRef90_A0A1C1ZPN0	0.411144	0.0358453	4.4627e-07	0.00014249	12	4
UniRef90_A0A1C1ZAY5	0.190377	0.0165959	4.45769e-07	0.00014249	12	3
UniRef90_D4W6T8	0.188066	0.0163958	4.46103e-07	0.00014249	12	3
UniRef90_N2AD19	0.597393	0.0521006	4.47651e-07	0.000142843	12	4
UniRef90_A0A0U5JP51	0.468532	0.0409046	4.52019e-07	0.000143948	12	5
UniRef90_N2AKN9	0.6031	0.0526505	4.51822e-07	0.000143948	12	4
UniRef90_A0A081KVU3	0.496668	0.043358	4.51727e-07	0.000143948	12	4
UniRef90_A0A120IDQ2	0.180432	0.0157542	4.525e-07	0.000143948	12	3
UniRef90_D4W8I5	0.179032	0.0156309	4.5223e-07	0.000143948	12	3
UniRef90_F8KFW2	0.483532	0.0422312	4.53718e-07	0.000144247	12	5
UniRef90_A0A1B7LUA7	0.469688	0.0410276	4.54297e-07	0.000144343	12	5
UniRef90_A0A0U5JLD2	0.427098	0.0373109	4.54702e-07	0.000144383	12	5
UniRef90_A0A355X442	0.589034	0.0514698	4.55719e-07	0.000144617	12	4
UniRef90_A0A0U5JTZ7	0.491811	0.0429775	4.56026e-07	0.000144626	12	5
UniRef90_N2AKT1	0.521978	0.0456204	4.56656e-07	0.000144683	12	4
UniRef90_R5VLS9	0.292297	0.0255472	4.56763e-07	0.000144683	12	4
UniRef90_A0A0R1XYP0	0.53108	0.0464257	4.57548e-07	0.000144844	12	4
UniRef90_Q043V6	0.518923	0.0453781	4.58984e-07	0.00014521	12	5
UniRef90_A0A0R1XPU6	0.495977	0.0433785	4.59665e-07	0.000145337	12	4
UniRef90_A0A2S1EPT7	0.75614	0.0661441	4.60418e-07	0.000145486	12	6
UniRef90_A5VIQ0	0.65881	0.0576349	4.6078e-07	0.000145499	12	6
UniRef90_A0A2S1ENI9	0.466309	0.0407965	4.61019e-07	0.000145499	12	5
UniRef90_UPI000B99A128	0.635937	0.05565	4.6203e-07	0.000145565	12	5
UniRef90_S5N7U2	0.514059	0.0449899	4.6254e-07	0.000145565	12	5
UniRef90_F8KBX6	0.492301	0.0430978	4.63751e-07	0.000145565	12	5
UniRef90_A0A1C2G5K8	0.455855	0.0399057	4.63592e-07	0.000145565	12	5
UniRef90_A0A2S1EUM6	0.455615	0.0398703	4.62037e-07	0.000145565	12	5
UniRef90_A0A0R1U9W4	0.55791	0.0488405	4.63667e-07	0.000145565	12	4
UniRef90_A0A2R7DTS1	0.393291	0.0344171	4.62125e-07	0.000145565	12	4
UniRef90_Q74HY1	0.3408	0.0298295	4.62979e-07	0.000145565	12	4
UniRef90_A0A174VGY8	0.171285	0.0149931	4.63232e-07	0.000145565	12	3
UniRef90_A0A317GFU5	0.31846	0.0278853	4.6472e-07	0.000145781	12	4
UniRef90_N2ACY1	0.572814	0.0501614	4.65072e-07	0.000145803	12	4
UniRef90_A0A0U5JZZ5	0.577509	0.0505996	4.67403e-07	0.000146445	12	6
UniRef90_B3XP47	0.440644	0.038614	4.68093e-07	0.000146573	12	4
UniRef90_A0A0U5FCZ2	0.568566	0.0498316	4.68774e-07	0.000146609	12	5
UniRef90_N2AIA8	0.600894	0.0526637	4.68668e-07	0.000146609	12	4
UniRef90_N2A1W0	0.607685	0.0532643	4.69113e-07	0.000146627	12	4
UniRef90_Q74J86	0.75206	0.0659313	4.69936e-07	0.000146796	12	5
UniRef90_D4W3R6	0.16902	0.0148196	4.70527e-07	0.000146892	12	3
UniRef90_A0A087QED6	0.477429	0.0418662	4.71098e-07	0.000146894	12	6
UniRef90_A0A0R1XSY4	0.180562	0.0158332	4.70964e-07	0.000146894	12	3
UniRef90_B3XL19	0.496242	0.0435494	4.74496e-07	0.000147812	12	4
UniRef90_A0A134CLI7	0.176858	0.0155212	4.74613e-07	0.000147812	12	3
UniRef90_A0A256SKS0	0.555971	0.0487995	4.75259e-07	0.000147836	12	5
UniRef90_UPI00019CB301	0.504501	0.0442804	4.75122e-07	0.000147836	12	5
UniRef90_A0A1C2G5D6	0.540783	0.0474837	4.76881e-07	0.000148252	12	5
UniRef90_N2ADB5	0.477985	0.0419816	4.78144e-07	0.000148555	12	4
UniRef90_A0A1C1ZGU0	0.651406	0.0572273	4.79246e-07	0.000148809	12	5
UniRef90_A0A073JMV5	0.487492	0.0428364	4.80219e-07	0.000148933	12	4
UniRef90_A0A098QRY0	0.353133	0.0310284	4.79957e-07	0.000148933	12	4
UniRef90_A0A0X8G2V5	0.175422	0.0154174	4.81069e-07	0.000149107	12	3
UniRef90_R9WED6	0.606963	0.0533523	4.8172e-07	0.00014922	12	5
UniRef90_A0A0U5JNE8	0.543263	0.0477901	4.85231e-07	0.000150218	12	5
UniRef90_F8DLS3	0.693121	0.0609862	4.86216e-07	0.000150433	12	5
UniRef90_UPI0009B82D8B	0.191733	0.0168863	4.90579e-07	0.000151693	12	3
UniRef90_A0A3D0HP47	0.194452	0.0171368	4.9353e-07	0.000152514	12	3
UniRef90_A0A174A9L7	0.199411	0.0175756	4.9402e-07	0.000152575	12	3
UniRef90_D4YSN7	0.639738	0.0564042	4.95575e-07	0.000152873	12	4
UniRef90_UPI0005DCB3EE	0.171401	0.0151114	4.95389e-07	0.000152873	12	3
UniRef90_A0A256VAK2	0.199434	0.0175849	4.95906e-07	0.000152885	12	3
UniRef90_F8DQC6	0.343479	0.0302901	4.96554e-07	0.000152993	12	4
UniRef90_A0A2R7ESG5	0.540814	0.0477063	4.9791e-07	0.000153139	12	5
UniRef90_A0A0R2D2C3	0.502668	0.04434	4.97765e-07	0.000153139	12	5
UniRef90_A0A0X8G3M5	0.188164	0.0165971	4.97566e-07	0.000153139	12	3
UniRef90_A0A1S9ANI7	0.554418	0.0489205	4.99264e-07	0.000153464	12	5
UniRef90_A0A0X1TKB2	0.199503	0.0176114	5.01309e-07	0.000154001	12	3
UniRef90_A0A0U5JZB2	0.624739	0.0551603	5.02213e-07	0.000154188	12	5
UniRef90_A0A0R1XX22	0.525925	0.0464414	5.02786e-07	0.000154273	12	4
UniRef90_A0A0R1XQM0	0.483476	0.0427052	5.0413e-07	0.000154594	12	4
UniRef90_A0A2S1ET33	0.721323	0.0637188	5.04485e-07	0.000154611	12	5
UniRef90_F8DQJ8	0.359161	0.0317355	5.0577e-07	0.000154914	12	4
UniRef90_A0A173YAU4	0.199594	0.0176416	5.0724e-07	0.000155272	12	3
UniRef90_A0A1Y4P4X1	0.662596	0.0585693	5.07566e-07	0.000155281	12	5
UniRef90_A0A2S1ENC0	0.388216	0.0343193	5.08052e-07	0.000155338	12	4
UniRef90_A5VJ58	0.62446	0.0552125	5.08785e-07	0.00015547	12	5
UniRef90_A0A174B7P7	0.197535	0.0174673	5.09317e-07	0.000155541	12	3
UniRef90_N2A8H7	0.616935	0.0545714	5.10904e-07	0.000155934	12	4
UniRef90_A5VHF6	0.655706	0.0580086	5.11531e-07	0.00015602	12	5
UniRef90_A0A0X8G302	0.178374	0.0157811	5.11786e-07	0.00015602	12	3
UniRef90_A0A173WMN4	0.186613	0.0165178	5.14012e-07	0.000156607	12	3
UniRef90_S5NS64	0.397578	0.0351932	5.14322e-07	0.000156609	12	4
UniRef90_D4W4Z2	0.19915	0.0176355	5.16227e-07	0.000157097	12	3
UniRef90_A0A0U5JED3	0.577775	0.0511961	5.19235e-07	0.000157556	12	6
UniRef90_A0A073K3X5	0.543321	0.0481421	5.19114e-07	0.000157556	12	5
UniRef90_A0A0R1Y289	0.538012	0.047673	5.19252e-07	0.000157556	12	4
UniRef90_A0A1Y2UXP8	0.404655	0.0358502	5.18428e-07	0.000157556	12	4
UniRef90_UPI00081C1CDA	0.381807	0.0338295	5.18931e-07	0.000157556	12	4
UniRef90_V5P5I8	0.395178	0.0350211	5.19883e-07	0.000157655	12	4
UniRef90_R9WGT3	0.424318	0.0376235	5.22473e-07	0.000158348	12	5
UniRef90_A0A1C1Z6V1	0.609556	0.0540551	5.23089e-07	0.000158442	12	5
UniRef90_A0A0R1XP36	0.536661	0.0476016	5.242e-07	0.000158686	12	4
UniRef90_A0A173R4I7	0.17304	0.0153544	5.26051e-07	0.000159154	12	3
UniRef90_F8DL56	0.649621	0.057654	5.26999e-07	0.000159252	12	7
UniRef90_Q042P3	0.455441	0.040423	5.27298e-07	0.000159252	12	4
UniRef90_A0A174RTA3	0.200123	0.0177609	5.26969e-07	0.000159252	12	3
UniRef90_D4YT70	0.525149	0.0466283	5.29239e-07	0.000159746	12	4
UniRef90_A5VL29	0.565294	0.0502087	5.3081e-07	0.000160034	12	5
UniRef90_I7JVA2	0.412927	0.0366742	5.30622e-07	0.000160034	12	4
UniRef90_A0A0R1XWB4	0.556754	0.0494578	5.31568e-07	0.00016017	12	4
UniRef90_D0R312	0.482033	0.0428245	5.32079e-07	0.00016023	12	6
UniRef90_A0A1Y2UKZ4	0.446064	0.039643	5.33829e-07	0.000160664	12	4
UniRef90_A0A174DJ38	0.185106	0.0164543	5.34872e-07	0.000160885	12	3
UniRef90_A0A0A0HXM2	0.29271	0.0260212	5.35225e-07	0.000160898	12	4
UniRef90_A0A0R1XN76	0.498777	0.0443466	5.35952e-07	0.000161023	12	4
UniRef90_D4W2A3	0.19574	0.0174047	5.36336e-07	0.000161045	12	3
UniRef90_A0A073JNX0	0.536423	0.0477011	5.36733e-07	0.000161071	12	5
UniRef90_N2ACY6	0.56742	0.0504633	5.37305e-07	0.00016115	12	4
UniRef90_C2E312	0.608619	0.0541576	5.40115e-07	0.000161894	12	6
UniRef90_A0A2S1ER85	0.512295	0.045589	5.4041e-07	0.000161894	12	5
UniRef90_A0A2S1EQ74	0.480795	0.0428168	5.44074e-07	0.000162804	12	5
UniRef90_A0A351Q9C9	0.349641	0.0311367	5.44027e-07	0.000162804	12	4
UniRef90_F8DQC2	0.439243	0.0391254	5.45242e-07	0.000163059	12	5
UniRef90_A0A2R7DXZ3	0.549467	0.0489491	5.45817e-07	0.000163137	12	5
UniRef90_F8DL33	0.667038	0.0594343	5.46794e-07	0.000163335	12	6
UniRef90_A0A347T9M5	0.631171	0.056275	5.50115e-07	0.000164211	12	5
UniRef90_Q74J61	0.378017	0.0337055	5.50358e-07	0.000164211	12	5
UniRef90_N2AHH3	0.5067	0.0451988	5.52572e-07	0.000164777	12	4
UniRef90_A0A143Q288	0.504631	0.0450222	5.5349e-07	0.000164956	12	5
UniRef90_S5N9E5	0.57072	0.0509298	5.54629e-07	0.000165106	12	6
UniRef90_A0A073JS19	0.395713	0.0353123	5.54596e-07	0.000165106	12	4
UniRef90_A0A173WMJ8	0.171987	0.015354	5.56733e-07	0.000165637	12	3
UniRef90_C8P950	0.498967	0.0445529	5.57672e-07	0.00016581	12	5
UniRef90_N1ZVJ9	0.525586	0.0469338	5.58127e-07	0.00016581	12	4
UniRef90_A0A0R1XWS3	0.504418	0.0450476	5.58592e-07	0.00016581	12	4
UniRef90_Q74JI1	0.429275	0.0383362	5.58504e-07	0.00016581	12	4
UniRef90_A0A2S1ENQ9	0.683503	0.0610499	5.59352e-07	0.000165941	12	6
UniRef90_A0A1C1ZCJ2	0.178483	0.0159443	5.60137e-07	0.000166079	12	3
UniRef90_N1ZUB0	0.463559	0.0414165	5.60847e-07	0.000166194	12	4
UniRef90_N2AI31	0.640039	0.0571933	5.61695e-07	0.000166256	12	4
UniRef90_A5VIB3	0.403007	0.0360116	5.61584e-07	0.000166256	12	4
UniRef90_A0A0U5K5W8	0.51154	0.0457336	5.64312e-07	0.00016676	12	5
UniRef90_N2ARF2	0.62363	0.0557505	5.63907e-07	0.00016676	12	4
UniRef90_A0A0X1TLE4	0.167091	0.0149387	5.64363e-07	0.00016676	12	3
UniRef90_D4W1C6	0.196123	0.0175407	5.66286e-07	0.000167233	12	3
UniRef90_A0A0S4NLV5	0.679557	0.0608088	5.68995e-07	0.000167734	12	6
UniRef90_A0A1C2G6F2	0.542408	0.0485399	5.69393e-07	0.000167734	12	5
UniRef90_N1ZUM8	0.52357	0.046851	5.69038e-07	0.000167734	12	4
UniRef90_A0A0R1XX06	0.450223	0.0402876	5.69035e-07	0.000167734	12	4
UniRef90_C2E7L9	0.198749	0.0177867	5.69595e-07	0.000167734	12	3
UniRef90_Q74JT5	0.36087	0.0323024	5.70748e-07	0.000167978	12	4
UniRef90_N2AKZ1	0.691933	0.0619473	5.71667e-07	0.000168153	12	4
UniRef90_A0A2M9NLI3	0.432948	0.0387805	5.74362e-07	0.000168794	12	5
UniRef90_A0A081NQY6	0.35252	0.0315771	5.74495e-07	0.000168794	12	4
UniRef90_F8DM05	0.634866	0.056873	5.74929e-07	0.000168826	12	5
UniRef90_UPI000B984943	0.171183	0.0153364	5.75401e-07	0.000168869	12	3
UniRef90_N2ARL1	0.546054	0.0489248	5.7579e-07	0.000168887	12	4
UniRef90_UPI0003A9A1B0	0.479658	0.0429842	5.76827e-07	0.000169096	12	4
UniRef90_A5VHV4	0.283643	0.025441	5.81598e-07	0.000170398	12	4
UniRef90_S5NNI9	0.463507	0.0415787	5.82258e-07	0.000170399	12	5
UniRef90_N2AGC3	0.555072	0.0497914	5.82136e-07	0.000170399	12	4
UniRef90_A8YUI5	0.419281	0.03763	5.84945e-07	0.000171012	12	4
UniRef90_A0A1Q6RMD1	0.402015	0.0360808	5.85011e-07	0.000171012	12	4
UniRef90_A0A0R1XY16	0.384348	0.0345078	5.87009e-07	0.0001715	12	4
UniRef90_R9WGH5	0.379847	0.0341069	5.8752e-07	0.000171552	12	4
UniRef90_D4YTE3	0.544294	0.0488961	5.90138e-07	0.00017222	12	4
UniRef90_A0A2S1ES35	0.448648	0.0403078	5.90673e-07	0.000172279	12	4
UniRef90_F8KEC4	0.593505	0.0533319	5.91685e-07	0.000172478	12	5
UniRef90_A0A2S1ENF7	0.511661	0.045987	5.92825e-07	0.000172633	12	5
UniRef90_N2A707	0.543038	0.0488093	5.93078e-07	0.000172633	12	4
UniRef90_A0A0U5JMP0	0.193103	0.0173571	5.93266e-07	0.000172633	12	3
UniRef90_D4W6F4	0.168501	0.0151465	5.93549e-07	0.000172633	12	3
UniRef90_A0A1C2G5U7	0.476689	0.042864	5.95434e-07	0.000173078	12	5
UniRef90_A0A109RNZ3	0.163401	0.0146939	5.95746e-07	0.000173078	12	3
UniRef90_A0A350X095	0.200005	0.0179893	5.9691e-07	0.000173319	12	3
UniRef90_Q044D8	0.507335	0.0456512	5.99277e-07	0.00017391	12	6
UniRef90_A0A0R1XVP6	0.520044	0.0467997	5.99863e-07	0.000173983	12	4
UniRef90_A0A2S1EQI8	0.716251	0.0645251	6.05813e-07	0.000175231	12	5
UniRef90_A0A355X4Z4	0.528183	0.0475895	6.06626e-07	0.000175231	12	5
UniRef90_C2E651	0.514701	0.0463767	6.06869e-07	0.000175231	12	5
UniRef90_C2E6E7	0.481063	0.043343	6.06509e-07	0.000175231	12	5
UniRef90_N2A7P2	0.493528	0.0444624	6.06034e-07	0.000175231	12	4
UniRef90_V5P2Z4	0.462881	0.0416951	6.05186e-07	0.000175231	12	4
UniRef90_A0A256SVZ9	0.453179	0.0408233	6.05482e-07	0.000175231	12	4
UniRef90_A0A174VV69	0.189245	0.0170468	6.05232e-07	0.000175231	12	3
UniRef90_A0A0X1TKE6	0.187142	0.0168655	6.07936e-07	0.000175442	12	3
UniRef90_N2AKC5	0.575362	0.0518684	6.09701e-07	0.000175756	12	4
UniRef90_UPI000F488BD4	0.308665	0.0278256	6.09644e-07	0.000175756	12	4
UniRef90_N1ZSJ3	0.540981	0.0487794	6.10916e-07	0.000176008	12	4
UniRef90_A0A2S1EQF3	0.384432	0.0346765	6.13031e-07	0.00017652	12	4
UniRef90_C2E4N2	0.551445	0.0497487	6.13872e-07	0.000176664	12	5
UniRef90_A0A0R1XR93	0.424989	0.0383496	6.15223e-07	0.000176954	12	4
UniRef90_A0A1C2GBK4	0.198875	0.0179542	6.17903e-07	0.000177627	12	3
UniRef90_F8DQI7	0.543581	0.0490916	6.19993e-07	0.000178129	12	5
UniRef90_A0A174SA06	0.190405	0.0172011	6.21793e-07	0.000178547	12	3
UniRef90_A0A1C1ZTM2	0.340721	0.0307827	6.22182e-07	0.00017856	12	4
UniRef90_F8DLS7	0.61858	0.0558948	6.2309e-07	0.000178629	12	5
UniRef90_S5NBL3	0.539202	0.0487224	6.23108e-07	0.000178629	12	5
UniRef90_N2AT72	0.558453	0.0504825	6.25476e-07	0.00017911	12	4
UniRef90_D4W4Y7	0.16305	0.0147391	6.25447e-07	0.00017911	12	3
UniRef90_D0R4J4	0.499804	0.0451914	6.2685e-07	0.000179366	12	6
UniRef90_Q4JLE9	0.515317	0.0465958	6.27061e-07	0.000179366	12	5
UniRef90_B3XLN7	0.66617	0.0602689	6.30246e-07	0.000180178	12	5
UniRef90_UPI000421EF7C	0.192241	0.0173933	6.30629e-07	0.000180188	12	3
UniRef90_N1ZZG2	0.488003	0.0441656	6.32315e-07	0.00018057	12	4
UniRef90_A0A256VG56	0.178021	0.016115	6.33637e-07	0.000180848	12	3
UniRef90_A5VJE8	0.638067	0.0577767	6.35381e-07	0.00018101	12	5
UniRef90_A0A0D6A3D2	0.627292	0.0568065	6.35948e-07	0.00018101	12	5
UniRef90_A0A0U5F7G3	0.526767	0.0476928	6.34668e-07	0.00018101	12	5
UniRef90_A5VJD4	0.476617	0.0431584	6.35509e-07	0.00018101	12	5
UniRef90_C8P9M8	0.42373	0.0383722	6.35924e-07	0.00018101	12	4
UniRef90_Q50EJ5	0.552119	0.0500186	6.3827e-07	0.000181548	12	5
UniRef90_A5VHU6	0.509201	0.0461352	6.38885e-07	0.000181548	12	5
UniRef90_N2A1R1	0.17603	0.0159484	6.38696e-07	0.000181548	12	3
UniRef90_A0A143Q127	0.534909	0.0484681	6.39323e-07	0.000181573	12	5
UniRef90_A0A353UAI5	0.591092	0.0535631	6.39805e-07	0.00018161	12	4
UniRef90_R9WKA0	0.3925	0.0355845	6.42686e-07	0.000182129	12	4
UniRef90_A0A0R1XWT4	0.382413	0.0346683	6.42414e-07	0.000182129	12	4
UniRef90_A0A143Q0W0	0.200154	0.0181444	6.42108e-07	0.000182129	12	3
UniRef90_A0A174UVL4	0.182935	0.0165863	6.43153e-07	0.000182162	12	3
UniRef90_A0A174VA43	0.179697	0.0162959	6.44293e-07	0.000182386	12	3
UniRef90_A0A350X3S7	0.188242	0.0170728	6.44989e-07	0.000182483	12	3
UniRef90_N2ALX3	0.526598	0.0477684	6.4601e-07	0.000182672	12	4
UniRef90_N2AFD8	0.46563	0.0422445	6.46945e-07	0.000182837	12	4
UniRef90_F8KFQ5	0.640294	0.0580992	6.478e-07	0.000182979	12	5
UniRef90_D0R4B9	0.545252	0.0494922	6.49866e-07	0.000183463	12	5
UniRef90_S5NDU6	0.591811	0.0537229	6.50378e-07	0.000183508	12	5
UniRef90_A0A174BEU2	0.521541	0.0473658	6.5317e-07	0.000184195	12	4
UniRef90_A0A0X8G2K3	0.192984	0.0175278	6.53589e-07	0.000184213	12	3
UniRef90_A0A1V4FKD2	0.537719	0.0488539	6.55522e-07	0.00018461	12	5
UniRef90_A0A0R1XQE8	0.585108	0.0531703	6.56773e-07	0.00018461	12	4
UniRef90_Q5FM22	0.568475	0.0516563	6.56472e-07	0.00018461	12	4
UniRef90_A0A0R1Y0L3	0.474978	0.0431549	6.55708e-07	0.00018461	12	4
UniRef90_A5VMS9	0.20035	0.0182046	6.56223e-07	0.00018461	12	3
UniRef90_N1ZQF3	0.598633	0.054439	6.61237e-07	0.000185691	12	4
UniRef90_D4W1P4	0.164696	0.0149775	6.61335e-07	0.000185691	12	3
UniRef90_Q4JLQ3	0.624203	0.0567707	6.61932e-07	0.000185758	12	5
UniRef90_N2ALZ0	0.511303	0.0465237	6.64733e-07	0.000186443	12	4
UniRef90_A0A0X1TJG6	0.173066	0.0157488	6.65325e-07	0.000186509	12	3
UniRef90_F8DNB6	0.712837	0.0648811	6.66618e-07	0.00018677	12	5
UniRef90_N2A187	0.597236	0.0543693	6.67752e-07	0.000186987	12	4
UniRef90_R9WH76	0.572003	0.0521064	6.71843e-07	0.00018755	12	5
UniRef90_A0A073JN70	0.535487	0.04878	6.71846e-07	0.00018755	12	5
UniRef90_A5VML0	0.421224	0.0383672	6.71197e-07	0.00018755	12	5
UniRef90_V5P2N6	0.420626	0.0383173	6.7193e-07	0.00018755	12	5
UniRef90_A0A174RYH3	0.198072	0.0180394	6.70514e-07	0.00018755	12	3
UniRef90_A0A174RL27	0.188886	0.0172063	6.71751e-07	0.00018755	12	3
UniRef90_N2AM14	0.621752	0.0566498	6.73123e-07	0.000187681	12	4
UniRef90_N1ZXZ9	0.200359	0.0182546	6.72849e-07	0.000187681	12	3
UniRef90_B3XQF1	0.170246	0.0155127	6.73517e-07	0.00018769	12	3
UniRef90_A0A1X8VBR4	0.544558	0.0496261	6.74343e-07	0.00018782	12	5
UniRef90_F8DKU9	0.626783	0.0571527	6.78018e-07	0.000188742	12	5
UniRef90_A0A173ZU86	0.202886	0.0185085	6.80926e-07	0.00018945	12	3
UniRef90_N2AJC4	0.522108	0.0476444	6.82846e-07	0.000189882	12	4
UniRef90_A0A174BI71	0.188203	0.017183	6.86097e-07	0.000190684	12	3
UniRef90_A0A174ATW4	0.196162	0.0179141	6.87643e-07	0.000191012	12	3
UniRef90_N2AM57	0.486362	0.044421	6.88385e-07	0.000191115	12	4
UniRef90_A5VIR6	0.632393	0.0577622	6.88802e-07	0.000191129	12	6
UniRef90_A0A0R1Y477	0.571428	0.0522061	6.90321e-07	0.000191346	12	4
UniRef90_N1ZT32	0.467685	0.0427271	6.90159e-07	0.000191346	12	4
UniRef90_A0A287INB9	0.171569	0.0156772	6.91333e-07	0.000191524	12	3
UniRef90_N2ARI0	0.557988	0.0509977	6.92781e-07	0.000191823	12	4
UniRef90_A0A2S1EPL3	0.637282	0.0582572	6.94141e-07	0.000191935	12	5
UniRef90_F8DRP0	0.618506	0.0565419	6.94264e-07	0.000191935	12	5
UniRef90_A0A174AMM9	0.201977	0.0184642	6.94293e-07	0.000191935	12	3
UniRef90_A0A0X1TKB3	0.200773	0.0183629	6.97402e-07	0.000192692	12	3
UniRef90_D4W2U9	0.171598	0.0156987	6.99122e-07	0.000193064	12	3
UniRef90_F8DN46	0.554594	0.050744	6.99973e-07	0.000193196	12	5
UniRef90_A0A2M9NL92	0.501455	0.045899	7.02397e-07	0.000193762	12	6
UniRef90_Q74LM3	0.560876	0.0513409	7.0279e-07	0.000193768	12	6
UniRef90_F8DNJ2	0.457326	0.0418694	7.039e-07	0.000193965	12	5
UniRef90_A0A0R1YBD2	0.203517	0.0186335	7.04251e-07	0.000193965	12	3
UniRef90_A0A2S1ENJ6	0.672025	0.0615498	7.06468e-07	0.000194299	12	6
UniRef90_A0A2S1ET38	0.490945	0.0449657	7.06587e-07	0.000194299	12	5
UniRef90_A0A174RP60	0.16414	0.015032	7.05874e-07	0.000194299	12	3
UniRef90_F8DNB0	0.705065	0.0645831	7.07202e-07	0.000194341	12	6
UniRef90_N1ZW11	0.507857	0.0465211	7.07488e-07	0.000194341	12	4
UniRef90_A0A174RHM9	0.193626	0.0177378	7.07936e-07	0.000194361	12	3
UniRef90_S5NB25	0.407425	0.0373293	7.08915e-07	0.000194424	12	5
UniRef90_A0A173WNI0	0.184649	0.0169171	7.08576e-07	0.000194424	12	3
UniRef90_N2A6S4	0.460478	0.0422091	7.11867e-07	0.000195131	12	4
UniRef90_F8KGN6	0.378822	0.034745	7.15853e-07	0.000195913	12	4
UniRef90_A0A174Q2C1	0.166963	0.0153132	7.15674e-07	0.000195913	12	3
UniRef90_A0A0X1TK02	0.165644	0.0151919	7.15533e-07	0.000195913	12	3
UniRef90_A0A317G9G6	0.626175	0.0574434	7.17186e-07	0.000196022	12	6
UniRef90_B3XR95	0.505465	0.0463713	7.17383e-07	0.000196022	12	5
UniRef90_N2AEA8	0.528865	0.0485162	7.17144e-07	0.000196022	12	4
UniRef90_A0A363ECA8	0.468935	0.0430257	7.18256e-07	0.000196157	12	5
UniRef90_A0A1Y3UJW3	0.503334	0.0462021	7.21192e-07	0.000196855	12	5
UniRef90_A5VIG0	0.477737	0.0438634	7.2286e-07	0.000197207	12	5
UniRef90_A0A1V4FND1	0.792686	0.0727848	7.23262e-07	0.000197213	12	5
UniRef90_A0A168L6H0	0.169299	0.0155463	7.23778e-07	0.00019725	12	3
UniRef90_A0A0R1UBQ0	0.41002	0.0376563	7.24699e-07	0.000197397	12	4
UniRef90_D4YT45	0.50471	0.046358	7.25489e-07	0.000197509	12	4
UniRef90_F8DL98	0.613975	0.056398	7.25942e-07	0.000197528	12	5
UniRef90_A0A0R1XYE8	0.521494	0.0479115	7.27162e-07	0.000197653	12	6
UniRef90_A0A1C2GCP2	0.350452	0.0321964	7.26967e-07	0.000197653	12	4
UniRef90_A0A1Z1NCP7	0.51259	0.0471127	7.29918e-07	0.000198299	12	6
UniRef90_A0A1C1ZJI9	0.431627	0.0396808	7.31545e-07	0.000198637	12	4
UniRef90_A0A2S0JG19	0.899774	0.0827358	7.32931e-07	0.000198873	12	6
UniRef90_D3YLJ3	0.579095	0.0532508	7.33181e-07	0.000198873	12	5
UniRef90_A0A2M9NLP7	0.632145	0.0581349	7.33872e-07	0.000198956	12	5
UniRef90_A0A0R1XWF5	0.57244	0.0526515	7.34822e-07	0.000199006	12	4
UniRef90_B3XN57	0.204113	0.0187731	7.34571e-07	0.000199006	12	3
UniRef90_F8DKS6	0.594998	0.0547401	7.36533e-07	0.000199158	12	6
UniRef90_B3XLE6	0.558478	0.051379	7.36371e-07	0.000199158	12	6
UniRef90_A0A0U5F2P1	0.575709	0.0529645	7.36402e-07	0.000199158	12	5
UniRef90_A0A0R1Y5P6	0.583936	0.0537292	7.37403e-07	0.000199186	12	4
UniRef90_A0A173ZM76	0.170303	0.0156694	7.37199e-07	0.000199186	12	3
UniRef90_B3XM21	0.638914	0.0588039	7.39277e-07	0.000199588	12	5
UniRef90_A0A174D0R7	0.173883	0.0160079	7.41049e-07	0.000199962	12	3
UniRef90_F8KDR0	0.687344	0.0633066	7.44212e-07	0.000200711	12	6
UniRef90_A0A174QYV2	0.429262	0.039542	7.45193e-07	0.000200872	12	4
UniRef90_A0A285PWJ1	0.169252	0.0155956	7.47295e-07	0.000201334	12	3
UniRef90_S5NB68	0.50948	0.0469511	7.48105e-07	0.000201448	12	5
UniRef90_N2AI36	0.598447	0.0551658	7.50107e-07	0.000201882	12	4
UniRef90_A0A1Z1N880	0.445158	0.0410383	7.50605e-07	0.000201911	12	6
UniRef90_N2AHP6	0.703075	0.0648271	7.51881e-07	0.00020215	12	4
UniRef90_A0A0X8G3H2	0.164139	0.0151359	7.52562e-07	0.000202228	12	3
UniRef90_A0A0R1Y2S1	0.535315	0.0493693	7.53377e-07	0.000202342	12	4
UniRef90_F8DLS0	0.703143	0.0648619	7.54969e-07	0.000202491	12	5
UniRef90_Q5FM81	0.609654	0.0562355	7.54659e-07	0.000202491	12	4
UniRef90_A0A1Q6UK68	0.202408	0.0186716	7.55099e-07	0.000202491	12	3
UniRef90_A5VLJ1	0.676046	0.0623718	7.56026e-07	0.000202634	12	5
UniRef90_A0A0U5JLB7	0.521971	0.0481767	7.58921e-07	0.000203305	12	5
UniRef90_A0A2S1ET78	0.586416	0.054139	7.60761e-07	0.000203693	12	5
UniRef90_A0A0U5F7K0	0.617942	0.057087	7.65404e-07	0.000204725	12	5
UniRef90_UPI00041BECBE	0.185421	0.0171288	7.65056e-07	0.000204725	12	3
UniRef90_N2AHI5	0.185431	0.0171337	7.66715e-07	0.00020497	12	3
UniRef90_A5VKP4	0.58819	0.054355	7.67575e-07	0.000205095	12	5
UniRef90_N1ZX30	0.535257	0.049473	7.68956e-07	0.000205358	12	4
UniRef90_A0A0X8G2V6	0.204367	0.0188936	7.70571e-07	0.000205683	12	3
UniRef90_A0A0R1XYR6	0.477084	0.0441224	7.73211e-07	0.000206208	12	4
UniRef90_N2ACH8	0.427488	0.0395384	7.7373e-07	0.000206208	12	4
UniRef90_A0A2R7DRM6	0.307961	0.0284821	7.73417e-07	0.000206208	12	4
UniRef90_N2ASQ2	0.465287	0.0430562	7.77354e-07	0.000207068	12	4
UniRef90_D0R442	0.436359	0.040393	7.79821e-07	0.000207619	12	5
UniRef90_A0A0R1XTL4	0.54788	0.0507232	7.80791e-07	0.000207664	12	4
UniRef90_D4W7Q5	0.200299	0.0185437	7.8075e-07	0.000207664	12	3
UniRef90_N2AE49	0.635963	0.0588848	7.81637e-07	0.000207783	12	4
UniRef90_F8KBX2	0.6949	0.0643582	7.83479e-07	0.000208166	12	5
UniRef90_A0A0U5K2Y8	0.594757	0.0551012	7.85824e-07	0.000208255	12	6
UniRef90_A0A0U5JNI0	0.350718	0.0324883	7.84952e-07	0.000208255	12	4
UniRef90_UPI00047F3F9D	0.268271	0.0248553	7.86222e-07	0.000208255	12	4
UniRef90_A0A173WE59	0.199273	0.0184587	7.84672e-07	0.000208255	12	3
UniRef90_A0A173XV65	0.185001	0.0171397	7.85925e-07	0.000208255	12	3
UniRef90_D4W2X9	0.172704	0.0159995	7.85521e-07	0.000208255	12	3
UniRef90_N1ZZF8	0.544035	0.0504137	7.87498e-07	0.000208487	12	4
UniRef90_A0A0R1XRM4	0.495996	0.045969	7.88606e-07	0.000208674	12	4
UniRef90_C2E4X4	0.387108	0.0358891	7.91031e-07	0.000209209	12	4
UniRef90_F8KFP5	0.499406	0.0463277	7.9538e-07	0.000210145	12	5
UniRef90_N2AER0	0.585924	0.0543512	7.95045e-07	0.000210145	12	4
UniRef90_D0R4K2	0.572728	0.0531625	7.99967e-07	0.000211249	12	5
UniRef90_B2G6F4	0.62545	0.0580689	8.01572e-07	0.0002115	12	7
UniRef90_A0A081NSS4	0.533832	0.0495638	8.01733e-07	0.0002115	12	6
UniRef90_F8DRG4	0.564171	0.0523845	8.02276e-07	0.000211536	12	7
UniRef90_N1ZM29	0.471122	0.0437483	8.02898e-07	0.000211593	12	4
UniRef90_V5P0H9	0.318222	0.029552	8.03385e-07	0.000211614	12	4
UniRef90_A0A2S1EP52	0.568622	0.0528125	8.04346e-07	0.000211759	12	5
UniRef90_R5DM66	-0.480103	0.0446304	8.10967e-07	0.000213286	12	12
UniRef90_A0A1C1ZNP4	0.510128	0.0474206	8.10815e-07	0.000213286	12	5
UniRef90_A0A174QEU1	0.18643	0.0173326	8.11838e-07	0.000213407	12	3
UniRef90_N2ALL0	0.529362	0.049221	8.12722e-07	0.000213531	12	4
UniRef90_Q5FM74	0.606257	0.0563776	8.13628e-07	0.000213661	12	4
UniRef90_A0A174B239	0.197621	0.0183828	8.15853e-07	0.000214137	12	3
UniRef90_A0A087QCB9	0.487285	0.0453409	8.18101e-07	0.000214483	12	5
UniRef90_D0R5V0	0.463193	0.0430978	8.17843e-07	0.000214483	12	5
UniRef90_N2AI50	0.533823	0.0496759	8.18825e-07	0.000214483	12	4
UniRef90_N2AHP3	0.486947	0.0453123	8.18588e-07	0.000214483	12	4
UniRef90_I7LAN6	0.508969	0.0473665	8.19367e-07	0.000214517	12	7
UniRef90_A0A0U5F8J8	0.610235	0.0568113	8.22134e-07	0.000215133	12	5
UniRef90_N2ARF7	0.657134	0.0611901	8.23704e-07	0.000215435	12	4
UniRef90_A0A0R1XXV4	0.471091	0.0439142	8.32071e-07	0.000217405	12	4
UniRef90_A0A317GDC0	0.418462	0.0390075	8.31911e-07	0.000217405	12	4
UniRef90_N2A9F8	0.196083	0.0182882	8.36154e-07	0.000218252	12	3
UniRef90_A0A174AED1	0.181714	0.0169476	8.35965e-07	0.000218252	12	3
UniRef90_N1ZUG1	0.503412	0.0469638	8.38116e-07	0.000218654	12	4
UniRef90_A5VLJ3	0.459915	0.0429285	8.4221e-07	0.000219612	12	5
UniRef90_N2AKU9	0.523633	0.0488814	8.4307e-07	0.000219726	12	4
UniRef90_A0A0U5JYR4	0.559978	0.0522908	8.45563e-07	0.000220154	12	6
UniRef90_A0A256V2Q7	0.174321	0.0162775	8.45293e-07	0.000220154	12	3
UniRef90_A0A0U5EXS6	0.604822	0.0564922	8.47485e-07	0.000220544	12	5
UniRef90_D4W7H1	0.174819	0.016331	8.48641e-07	0.000220734	12	3
UniRef90_A0A0R1Y5R5	0.581897	0.0543861	8.52583e-07	0.000221648	12	4
UniRef90_F8DNI1	0.516055	0.048245	8.54658e-07	0.000221754	12	5
[truncated: 5,238 more rows]

## Sheet: Table S3
Table S3. Enriched and annotated enzyme commission numbers (EC) in cecums of TCDD-exposed mice. Mean of relative abundances (copies per million reads, CPM), standard deviation [sd], n=3) are denoted in respective columns. Adjusted p-values (adj. p) were determined by the Maaslin2 R package.
EC	dose (µg/kg)	species	mean CPM	sd	adj. p	name
4.2.1.22	0	Lactobacillus_reuteri	0	0	3.37e-05	Cystathionine beta-synthase
	0.3	Lactobacillus_reuteri	0.0237593	0.0411524
	3	Lactobacillus_reuteri	0.0270177	0.046796
	30	Lactobacillus_reuteri	0.758372	0.0552942
2.7.1.76	0	Lactobacillus_intestinalis	0	0	4.58e-05	Deoxyadenosine kinase
		Lactobacillus_johnsonii	0	0
		Lactobacillus_reuteri	0	0
		Unclassified	0	0
	0.3	Lactobacillus_intestinalis	0	0
		Lactobacillus_johnsonii	0.0466127	0.0807355
		Lactobacillus_reuteri	0.110238	0.190938
		Unclassified	0	0
	3	Lactobacillus_intestinalis	0	0
		Lactobacillus_johnsonii	0.120679	0.122453
		Lactobacillus_reuteri	0.23872	0.237261
		Unclassified	0	0
	30	Lactobacillus_intestinalis	0.722981	0.756661
		Lactobacillus_johnsonii	1.25261	0.568793
		Lactobacillus_reuteri	2.72057	0.693351
		Unclassified	0.056257	0.0635163
2.7.4.2	0	Lactobacillus_reuteri	0	0	4.7e-05	Phosphomevalonate kinase
	0.3	Lactobacillus_reuteri	0.039702	0.0687659
	3	Lactobacillus_reuteri	0.036994	0.0640755
	30	Lactobacillus_reuteri	0.835544	0.0625083
3.1.4.1	0	Lactobacillus_reuteri	0	0	6.54e-05	Phosphodiesterase I
		Unclassified	0	0
	0.3	Lactobacillus_reuteri	0	0
		Unclassified	0.0201157	0.0348414
	3	Lactobacillus_reuteri	0.0316583	0.0548338
		Unclassified	0	0
	30	Lactobacillus_reuteri	0.824483	0.226347
		Unclassified	0	0
1.2.1.24	0	Lactobacillus_reuteri	0	0	0.00021938	Succinate-semialdehyde dehydrogenase (NAD(+))
	0.3	Lactobacillus_reuteri	0.0445707	0.0771987
	3	Lactobacillus_reuteri	0.0253413	0.0438925
	30	Lactobacillus_reuteri	0.910617	0.0859849
2.3.3.10	0	Lactobacillus_johnsonii	0	0		Hydroxymethylglutaryl-CoA synthase
		Lactobacillus_reuteri	0	0
		Unclassified	0.0101933	0.0176554
	0.3	Lactobacillus_johnsonii	0	0
		Lactobacillus_reuteri	0	0
		Unclassified	0	0
	3	Lactobacillus_johnsonii	0	0
		Lactobacillus_reuteri	0.0333303	0.0577298
		Unclassified	0	0
	30	Lactobacillus_johnsonii	0.0727857	0.0419282
		Lactobacillus_reuteri	0.922081	0.255329
		Unclassified	0	0
1.3.1.2	0	Lactobacillus_reuteri	0	0	0.000326389	Dihydropyrimidine dehydrogenase (NADP(+))
	0.3	Lactobacillus_reuteri	0	0
	3	Lactobacillus_reuteri	0.0419007	0.0373537
	30	Lactobacillus_reuteri	0.440359	0.214677
2.7.1.12	0	Lactobacillus_reuteri	0	0	0.000667074	Gluconokinase
		Unclassified	0	0
	0.3	Lactobacillus_reuteri	0.022592	0.0391305
		Unclassified	0.014398	0.0249381
	3	Lactobacillus_reuteri	0.0374647	0.0648907
		Unclassified	0.0262303	0.0234055
	30	Lactobacillus_reuteri	0.927884	0.0902167
		Unclassified	0	0
6.3.2.12	0	Escherichia_coli	0	0	0.000751415	Dihydrofolate synthase
		Lactobacillus_reuteri	0	0
		Unclassified	0	0
	0.3	Escherichia_coli	0	0
		Lactobacillus_reuteri	0.0538287	0.093234
		Unclassified	0	0
	3	Escherichia_coli	0	0
		Lactobacillus_reuteri	0.0279397	0.0483929
		Unclassified	0	0
	30	Escherichia_coli	0.036104	0.062534
		Lactobacillus_reuteri	0.764358	0.237606
		Unclassified	0.0298313	0.0516694
3.2.2.1	0	Lactobacillus_johnsonii	0	0	0.00133964	Purine nucleosidase
		Lactobacillus_reuteri	0	0
		Unclassified	0	0
	0.3	Lactobacillus_johnsonii	0.0167093	0.0289414
		Lactobacillus_reuteri	0.0360423	0.0624272
		Unclassified	0.0195723	0.0339003
	3	Lactobacillus_johnsonii	0.104659	0.110072
		Lactobacillus_reuteri	0.105496	0.182724
		Unclassified	0	0
	30	Lactobacillus_johnsonii	0.741002	0.166927
		Lactobacillus_reuteri	2.66713	0.200166
		Unclassified	0	0
2.7.1.113	0	Lactobacillus_johnsonii	0.0214397	0.0371346	0.00149598	Deoxyguanosine kinase
		Lactobacillus_reuteri	0	0
		Unclassified	1.53984	0.287402
	0.3	Lactobacillus_johnsonii	0.0346003	0.0599295
		Lactobacillus_reuteri	0.0263687	0.0456719
		Unclassified	1.49804	0.447798
	3	Lactobacillus_johnsonii	0.150633	0.182812
		Lactobacillus_reuteri	0.0209893	0.0363546
		Unclassified	1.45064	0.541164
	30	Lactobacillus_johnsonii	1.4046	0.43448
		Lactobacillus_reuteri	1.03363	0.19428
		Unclassified	2.59398	0.678067
1.8.1.7	0	Escherichia_coli	0	0	0.00240862	Glutathione-disulfide reductase
		Lactobacillus_johnsonii	0.0412043	0.071368
		Lactobacillus_reuteri	0	0
		Unclassified	0	0
	0.3	Escherichia_coli	0	0
		Lactobacillus_johnsonii	0.0197297	0.0341728
		Lactobacillus_reuteri	0.03066	0.0531047
		Unclassified	0	0
	3	Escherichia_coli	0.020015	0.034667
		Lactobacillus_johnsonii	0.175216	0.167358
		Lactobacillus_reuteri	0.056434	0.0977466
		Unclassified	0	0
	30	Escherichia_coli	0.0280787	0.0486337
		Lactobacillus_johnsonii	1.21381	0.477094
		Lactobacillus_reuteri	0.893402	0.0267902
		Unclassified	0.0485327	0.084061
1.7.99.4	0	Escherichia_coli	0	0	0.00246287	Nitrate reductase
		Lactobacillus_reuteri	0	0
		Parasutterella_excrementihominis	0	0
		Unclassified	0.356862	0.117808
	0.3	Escherichia_coli	0	0
		Lactobacillus_reuteri	0.0395513	0.0685049
		Parasutterella_excrementihominis	0.0273453	0.0473635
		Unclassified	0.429224	0.0373472
	3	Escherichia_coli	0.0676403	0.0790382
		Lactobacillus_reuteri	0.0964653	0.167083
		Parasutterella_excrementihominis	0.0595863	0.103207
		Unclassified	0.818078	0.13796
	30	Escherichia_coli	0.0111487	0.0193101
		Lactobacillus_reuteri	2.61587	0.308883
		Parasutterella_excrementihominis	0.207221	0.358917
		Unclassified	0.710008	0.338413
5.1.1.13	0	Lactobacillus_intestinalis	0	0		Aspartate racemase
		Lactobacillus_johnsonii	0	0
		Lactobacillus_reuteri	0	0
		Parasutterella_excrementihominis	0	0
		Unclassified	0.354903	0.12876
	0.3	Lactobacillus_intestinalis	0	0
		Lactobacillus_johnsonii	0.0779977	0.102938
		Lactobacillus_reuteri	0.02732	0.0473196
		Parasutterella_excrementihominis	0.0119447	0.0206888
		Unclassified	0.347717	0.247409
	3	Lactobacillus_intestinalis	0	0
		Lactobacillus_johnsonii	0.250077	0.171919
		Lactobacillus_reuteri	0.0634197	0.109846
		Parasutterella_excrementihominis	0.085777	0.14857
		Unclassified	0.175147	0.224398
	30	Lactobacillus_intestinalis	0.857108	0.756635
		Lactobacillus_johnsonii	1.3646	0.733275
		Lactobacillus_reuteri	0.998868	0.116768
		Parasutterella_excrementihominis	0.204893	0.354886
		Unclassified	0.411352	0.169337
1.7.1.7	0	Escherichia_coli	0	0	0.00404646	GMP reductase
		Lactobacillus_intestinalis	0	0
		Lactobacillus_johnsonii	0.0149467	0.0258884
		Lactobacillus_murinus	0.92354	0.174822
		Lactobacillus_reuteri	0.0408597	0.070771
		Parasutterella_excrementihominis	0.0252853	0.0437955
		Unclassified	0.0794113	0.0938175
	0.3	Escherichia_coli	0	0
		Lactobacillus_intestinalis	0	0
		Lactobacillus_johnsonii	0.0432313	0.0748789
		Lactobacillus_murinus	0.451252	0.261162
		Lactobacillus_reuteri	0.0816943	0.141499
		Parasutterella_excrementihominis	0.0641213	0.111061
		Unclassified	0.0956063	0.0990073
	3	Escherichia_coli	0	0
		Lactobacillus_intestinalis	0.0344507	0.0596703
		Lactobacillus_johnsonii	0.350333	0.332994
		Lactobacillus_murinus	0.551018	0.561571
		Lactobacillus_reuteri	0.21287	0.184351
		Parasutterella_excrementihominis	0.0256823	0.0444831
		Unclassified	0.227269	0.128647
	30	Escherichia_coli	0.028693	0.0249422
		Lactobacillus_intestinalis	0.829	0.519083
		Lactobacillus_johnsonii	2.18286	0.644698
		Lactobacillus_murinus	0.191978	0.0387086
		Lactobacillus_reuteri	2.35107	0.448959
		Parasutterella_excrementihominis	0.247171	0.428113
		Unclassified	0.376422	0.110043
2.5.1.145	0	Bacteroides_thetaiotaomicron	0	0		Phosphatidylglycerol---prolipoprotein diacylglyceryl transferase
		Lactobacillus_johnsonii	0	0
		Lactobacillus_reuteri	0.0387537	0.0671233
	0.3	Bacteroides_thetaiotaomicron	0	0
		Lactobacillus_johnsonii	0.064243	0.111272
		Lactobacillus_reuteri	0.0153163	0.0265287
	3	Bacteroides_thetaiotaomicron	0.026294	0.0455425
		Lactobacillus_johnsonii	0.0597743	0.103532
		Lactobacillus_reuteri	0.057149	0.098985
	30	Bacteroides_thetaiotaomicron	0	0
		Lactobacillus_johnsonii	0.874512	0.179819
		Lactobacillus_reuteri	0.987597	0.0714011
2.5.1.30	0	Lactobacillus_johnsonii	0	0	0.00406489	Heptaprenyl diphosphate synthase
		Lactobacillus_reuteri	0	0
		Unclassified	1.21907	0.329833
	0.3	Lactobacillus_johnsonii	0.0345127	0.0597777
		Lactobacillus_reuteri	0.0156247	0.0270627
		Unclassified	0.87897	0.183637
	3	Lactobacillus_johnsonii	0.104833	0.135287
		Lactobacillus_reuteri	0.0401297	0.0695066
		Unclassified	0.769387	0.486909
	30	Lactobacillus_johnsonii	0.871517	0.16439
		Lactobacillus_reuteri	0.673993	0.0659199
		Unclassified	1.81578	0.62314
3.6.1.11	0	Acetatifactor_muris	0	0	0.00497688	Exopolyphosphatase
		Escherichia_coli	0	0
		Lactobacillus_reuteri	0	0
		Unclassified	0.709656	0.503814
	0.3	Acetatifactor_muris	0	0
		Escherichia_coli	0	0
		Lactobacillus_reuteri	0.0626907	0.108583
		Unclassified	0.381345	0.0723416
	3	Acetatifactor_muris	0.0518743	0.0590623
		Escherichia_coli	0.09428	0.163298
		Lactobacillus_reuteri	0.0845803	0.11344
		Unclassified	0.68676	0.135626
	30	Acetatifactor_muris	0.101966	0.119409
		Escherichia_coli	0.117708	0.127461
		Lactobacillus_reuteri	2.1545	0.264518
		Unclassified	1.15684	0.781475
1.2.1.16	0	Escherichia_coli	0	0	0.0050023	Succinate-semialdehyde dehydrogenase (NAD(P)(+))
		Lactobacillus_reuteri	0	0
		Unclassified	0	0
	0.3	Escherichia_coli	0	0
		Lactobacillus_reuteri	0.0445707	0.0771987
		Unclassified	0.010861	0.0188118
	3	Escherichia_coli	0	0
		Lactobacillus_reuteri	0.0253413	0.0438925
		Unclassified	0.0370707	0.0642083
	30	Escherichia_coli	0.134111	0.232286
		Lactobacillus_reuteri	0.910617	0.0859849
		Unclassified	0.0572767	0.052178
4.1.1.33	0	Lactobacillus_johnsonii	0	0		Diphosphomevalonate decarboxylase
		Lactobacillus_reuteri	0	0
	0.3	Lactobacillus_johnsonii	0	0
		Lactobacillus_reuteri	0.053524	0.0927063
	3	Lactobacillus_johnsonii	0.128662	0.171202
		Lactobacillus_reuteri	0.0282897	0.0489991
	30	Lactobacillus_johnsonii	0.704839	0.175233
		Lactobacillus_reuteri	0.718219	0.280941
4.2.1.113	0	Bacteroides_vulgatus	0	0		o-succinylbenzoate synthase
		Escherichia_coli	0	0
		Lactobacillus_reuteri	0	0
		Unclassified	0.146447	0.146985
	0.3	Bacteroides_vulgatus	0.0237657	0.0411633
		Escherichia_coli	0	0
		Lactobacillus_reuteri	0.0490043	0.084878
		Unclassified	0.136042	0.0490822
	3	Bacteroides_vulgatus	0.0459417	0.0795733
		Escherichia_coli	0	0
		Lactobacillus_reuteri	0.051468	0.0891452
		Unclassified	0.169755	0.0276497
	30	Bacteroides_vulgatus	0.0951913	0.164876
		Escherichia_coli	0.0243707	0.0422112
		Lactobacillus_reuteri	1.03792	0.0199481
		Unclassified	0.143729	0.0350008
1.6.99.3	0	Escherichia_coli	0	0	0.00507563	NADH dehydrogenase
		Lactobacillus_reuteri	0	0
		Romboutsia_ilealis	0	0
		Unclassified	0	0
	0.3	Escherichia_coli	0	0
		Lactobacillus_reuteri	0.128633	0.222798
		Romboutsia_ilealis	0	0
		Unclassified	0	0
	3	Escherichia_coli	0	0
		Lactobacillus_reuteri	0.126522	0.168957
		Romboutsia_ilealis	0	0
		Unclassified	0.0236763	0.0410086
	30	Escherichia_coli	0.014635	0.0253486
		Lactobacillus_reuteri	2.02671	0.284805
		Romboutsia_ilealis	0.05132	0.0888888
		Unclassified	0.592989	0.377723
3.1.3.48	0	Acetatifactor_muris	0	0	0.00673107	Protein-tyrosine-phosphatase
		Bacteroides_thetaiotaomicron	0.032617	0.0564943
		Bacteroides_uniformis	1.09089	0.267229
		Bacteroides_vulgatus	0.146264	0.253336
		Bacteroides_vulgatus_CAG_6	0.05645	0.0977743
		Escherichia_coli	0	0
		Faecalibaculum_rodentium	0.16109	0.0565465
		Lactobacillus_intestinalis	0	0
		Lactobacillus_johnsonii	0	0
		Lactobacillus_reuteri	0	0
		Parabacteroides_distasonis	0.087644	0.151804
		Staphylococcus_lentus	0	0
		Unclassified	4.32762	1.80297
	0.3	Acetatifactor_muris	0	0
		Bacteroides_thetaiotaomicron	0	0
		Bacteroides_uniformis	0.907273	1.12817
		Bacteroides_vulgatus	0.0977557	0.169318
		Bacteroides_vulgatus_CAG_6	0.0726697	0.125868
		Escherichia_coli	0	0
		Faecalibaculum_rodentium	0.0815033	0.141168
		Lactobacillus_intestinalis	0	0
		Lactobacillus_johnsonii	0.0409333	0.0708986
		Lactobacillus_reuteri	0.127655	0.221104
		Parabacteroides_distasonis	0.293425	0.508227
		Staphylococcus_lentus	0	0
		Unclassified	3.95091	0.0736159
	3	Acetatifactor_muris	0	0
		Bacteroides_thetaiotaomicron	0.0372647	0.0645443
		Bacteroides_uniformis	0.74012	0.171972
		Bacteroides_vulgatus	0.329483	0.570682
		Bacteroides_vulgatus_CAG_6	0.163045	0.282402
		Escherichia_coli	0	0
		Faecalibaculum_rodentium	0.131408	0.154768
		Lactobacillus_intestinalis	0.0374317	0.0648335
		Lactobacillus_johnsonii	0.195159	0.278851
		Lactobacillus_reuteri	0.11831	0.165584
		Parabacteroides_distasonis	0.200347	0.347012
		Staphylococcus_lentus	0	0
		Unclassified	4.33748	0.714587
	30	Acetatifactor_muris	0.220094	0.226506
		Bacteroides_thetaiotaomicron	0	0
		Bacteroides_uniformis	0.76915	0.273284
		Bacteroides_vulgatus	0.328365	0.568745
		Bacteroides_vulgatus_CAG_6	0.138618	0.240093
		Escherichia_coli	0.0182333	0.0315811
		Faecalibaculum_rodentium	0.672854	1.16542
		Lactobacillus_intestinalis	0.853993	0.703045
		Lactobacillus_johnsonii	1.57652	0.463902
		Lactobacillus_reuteri	2.23776	0.301275
		Parabacteroides_distasonis	0.130131	0.225394
		Staphylococcus_lentus	0.0261943	0.0453699
		Unclassified	4.69588	2.20141
3.1.1.1	0	Escherichia_coli	0	0	0.0136095	Carboxylesterase
		Lactobacillus_reuteri	0	0
		Unclassified	0.145104	0.0833689
	0.3	Escherichia_coli	0	0
		Lactobacillus_reuteri	0.0331203	0.0573661
		Unclassified	0.122785	0.0488436
	3	Escherichia_coli	0.069092	0.119671
		Lactobacillus_reuteri	0.0823867	0.142698
		Unclassified	0.165356	0.0371527
	30	Escherichia_coli	0	0
		Lactobacillus_reuteri	1.00155	0.165648
		Unclassified	0.278047	0.154056
3.5.4.1	0	Escherichia_coli	0	0	0.0150411	Cytosine deaminase
		Lactobacillus_reuteri	0	0
		Romboutsia_ilealis	0	0
		Unclassified	0.762519	0.193068
	0.3	Escherichia_coli	0	0
		Lactobacillus_reuteri	0.026238	0.0454455
		Romboutsia_ilealis	0	0
		Unclassified	0.6222	0.098042
	3	Escherichia_coli	0.194264	0.336475
		Lactobacillus_reuteri	0.0403467	0.0698825
		Romboutsia_ilealis	0	0
		Unclassified	0.587024	0.185532
	30	Escherichia_coli	0.0860913	0.0813665
		Lactobacillus_reuteri	1.03847	0.177786
		Romboutsia_ilealis	0.05631	0.0975318
		Unclassified	0.703078	0.168911
2.7.1.69	0	Bacteroides_caecimuris	2.97766	1.33922	0.0194685	Protein-N(pi)-phosphohistidine--sugar phosphotransferase
		Bacteroides_ovatus	0	0
		Bacteroides_thetaiotaomicron	0.081259	0.140745
		Enterobacter_cloacae_complex	0	0
		Escherichia_coli	0	0
		Faecalibaculum_rodentium	1.93735	0.970702
		Lachnospiraceae_bacterium_28_4	0.136106	0.0442776
		Lactobacillus_intestinalis	0	0
		Lactobacillus_johnsonii	0.088234	0.152826
		Lactobacillus_reuteri	0.0399903	0.0692653
		Romboutsia_ilealis	0	0
		Unclassified	7.74644	2.42557
	0.3	Bacteroides_caecimuris	2.2059	0.645243
		Bacteroides_ovatus	0	0
		Bacteroides_thetaiotaomicron	0.205766	0.356397
		Enterobacter_cloacae_complex	0	0
		Escherichia_coli	0	0
		Faecalibaculum_rodentium	0.336169	0.582262
		Lachnospiraceae_bacterium_28_4	0.535203	0.25538
		Lactobacillus_intestinalis	0	0
		Lactobacillus_johnsonii	0.56156	0.733762
		Lactobacillus_reuteri	0.0370247	0.0641286
		Romboutsia_ilealis	0	0
		Unclassified	4.13246	0.788549
	3	Bacteroides_caecimuris	3.14149	0.764703
		Bacteroides_ovatus	1.31778	2.28246
		Bacteroides_thetaiotaomicron	0.278528	0.482425
		Enterobacter_cloacae_complex	0	0
		Escherichia_coli	0.14763	0.255703
		Faecalibaculum_rodentium	0.54692	0.947294
		Lachnospiraceae_bacterium_28_4	0.667548	0.641062
		Lactobacillus_intestinalis	0.0541447	0.0937813
		Lactobacillus_johnsonii	1.85197	1.6552
		Lactobacillus_reuteri	0.21462	0.186083
		Romboutsia_ilealis	0	0
		Unclassified	6.12483	1.014
	30	Bacteroides_caecimuris	1.56463	0.0690459
		Bacteroides_ovatus	0	0
		Bacteroides_thetaiotaomicron	0.0436283	0.0755665
		Enterobacter_cloacae_complex	0.0526973	0.0912745
		Escherichia_coli	0.114711	0.154669
		Faecalibaculum_rodentium	4.35632	7.26785
		Lachnospiraceae_bacterium_28_4	3.64161	2.47313
		Lactobacillus_intestinalis	1.29053	0.913431
		Lactobacillus_johnsonii	12.8769	3.83322
		Lactobacillus_reuteri	2.24349	0.322654
		Romboutsia_ilealis	0.252725	0.437732
		Unclassified	5.95407	1.46986
1.2.4.1	0	Escherichia_coli	0	0	0.0208149	Pyruvate dehydrogenase (acetyl-transferring)
		Lactobacillus_reuteri	0	0
		Unclassified	0	0
	0.3	Escherichia_coli	0	0
		Lactobacillus_reuteri	0.0325673	0.0564083
		Unclassified	0.11771	0.117779
	3	Escherichia_coli	0.017132	0.0296735
		Lactobacillus_reuteri	0.0567077	0.0982206
		Unclassified	0.054585	0.094544
	30	Escherichia_coli	0.0261217	0.0452441
		Lactobacillus_reuteri	0.857901	0.231915
		Unclassified	0.0957143	0.115497
3.4.22.40	0	Acetatifactor_muris	0	0		Bleomycin hydrolase
		Lactobacillus_intestinalis	0	0
		Lactobacillus_johnsonii	0	0
		Lactobacillus_reuteri	0	0
		Unclassified	0.0981853	0.0850529
	0.3	Acetatifactor_muris	0	0
		Lactobacillus_intestinalis	0	0
		Lactobacillus_johnsonii	0.0986383	0.170847
		Lactobacillus_reuteri	0.0612207	0.069916
		Unclassified	0.40449	0.178882
	3	Acetatifactor_muris	0	0
		Lactobacillus_intestinalis	0.0259107	0.0448786
		Lactobacillus_johnsonii	0.294097	0.322745
		Lactobacillus_reuteri	0.060443	0.10469
		Unclassified	0.32843	0.137328
	30	Acetatifactor_muris	0.027424	0.0474998
		Lactobacillus_intestinalis	0.669229	0.475969
		Lactobacillus_johnsonii	2.06413	0.574465
		Lactobacillus_reuteri	1.1079	0.298334
		Unclassified	0.551276	0.45216
1.18.1.2	0	Escherichia_coli	0	0	0.0246128	Ferredoxin--NADP(+) reductase
		Lactobacillus_intestinalis	0	0
		Lactobacillus_johnsonii	0.0372187	0.0644646
		Lactobacillus_murinus	1.06662	0.112
		Lactobacillus_reuteri	0	0
		Parasutterella_excrementihominis	0.027914	0.0483485
		Proteobacteria_bacterium_CAG_139	0	0
		Staphylococcus_lentus	0	0
		Unclassified	2.7536	0.171204
	0.3	Escherichia_coli	0	0
		Lactobacillus_intestinalis	0	0
		Lactobacillus_johnsonii	0.0193027	0.0334332
		Lactobacillus_murinus	0.480445	0.29714
		Lactobacillus_reuteri	0.0860103	0.0765857
		Parasutterella_excrementihominis	0.0574577	0.0995196
		Proteobacteria_bacterium_CAG_139	0	0
		Staphylococcus_lentus	0	0
		Unclassified	2.58331	0.820609
	3	Escherichia_coli	0.0150113	0.0260004
		Lactobacillus_intestinalis	0.0391423	0.0677965
		Lactobacillus_johnsonii	0.200717	0.188739
		Lactobacillus_murinus	0.658958	0.857633
		Lactobacillus_reuteri	0.0486917	0.0843364
		Parasutterella_excrementihominis	0.0680453	0.117858
		Proteobacteria_bacterium_CAG_139	0.00501833	0.00869201
		Staphylococcus_lentus	0	0
		Unclassified	2.35571	0.372383
	30	Escherichia_coli	0.0173807	0.0301042
		Lactobacillus_intestinalis	0.564981	0.480193
		Lactobacillus_johnsonii	0.975182	0.352143
		Lactobacillus_murinus	0.161572	0.104062
		Lactobacillus_reuteri	1.09901	0.0525764
		Parasutterella_excrementihominis	0.245446	0.425125
		Proteobacteria_bacterium_CAG_139	0.0244323	0.042318
		Staphylococcus_lentus	0.01112	0.0192604
		Unclassified	2.85669	0.126713
4.1.2.9	0	Bifidobacterium_pseudolongum	0.134414	0.141568	0.0267381	Phosphoketolase
		Lactobacillus_reuteri	0	0
		Unclassified	0	0
	0.3	Bifidobacterium_pseudolongum	0.148724	0.194163
		Lactobacillus_reuteri	0.027572	0.0477561
		Unclassified	0	0
	3	Bifidobacterium_pseudolongum	0.135873	0.158316
		Lactobacillus_reuteri	0.0536937	0.0930002
		Unclassified	0.0234497	0.040616
	30	Bifidobacterium_pseudolongum	0.57652	0.633744
		Lactobacillus_reuteri	1.17564	0.153735
		Unclassified	0	0
2.3.1.275	0	Lactobacillus_johnsonii	0	0	0.0276405	Acyl phosphate:glycerol-3-phosphate acyltransferase
		Lactobacillus_reuteri	0	0
		Unclassified	0.0395927	0.0685765
	0.3	Lactobacillus_johnsonii	0.0870063	0.150699
		Lactobacillus_reuteri	0	0
		Unclassified	0.0914693	0.104466
	3	Lactobacillus_johnsonii	0.0967557	0.167586
		Lactobacillus_reuteri	0	0
		Unclassified	0.20113	0.152727
	30	Lactobacillus_johnsonii	0.784158	0.480798
		Lactobacillus_reuteri	0.803318	0.0277546
		Unclassified	0.892195	0.0852392
6.3.2.17	0	Acetatifactor_muris	0.015266	0.0264415	0.0277196	Tetrahydrofolate synthase
		Bifidobacterium_pseudolongum	0.0571003	0.0989007
		Escherichia_coli	0	0
		Faecalibaculum_rodentium	0.247288	0.0719564
		Lactobacillus_johnsonii	0	0
		Lactobacillus_reuteri	0	0
		Parabacteroides_distasonis	0.0611497	0.105914
		Romboutsia_ilealis	0	0
		Unclassified	2.90402	0.808138
	0.3	Acetatifactor_muris	0.0170643	0.0295563
		Bifidobacterium_pseudolongum	0.218345	0.269545
		Escherichia_coli	0	0
		Faecalibaculum_rodentium	0.0495693	0.0858566
		Lactobacillus_johnsonii	0.0349103	0.0604665
		Lactobacillus_reuteri	0.0538287	0.093234
		Parabacteroides_distasonis	0.1268	0.219625
		Romboutsia_ilealis	0	0
		Unclassified	2.43548	0.78291
	3	Acetatifactor_muris	0.0852457	0.0561827
		Bifidobacterium_pseudolongum	0.149216	0.25845
		Escherichia_coli	0	0
		Faecalibaculum_rodentium	0.0391277	0.0677711
		Lactobacillus_johnsonii	0.092637	0.160452
		Lactobacillus_reuteri	0.0279397	0.0483929
		Parabacteroides_distasonis	0.074358	0.128792
		Romboutsia_ilealis	0	0
		Unclassified	2.7491	0.455231
	30	Acetatifactor_muris	0.119065	0.206227
		Bifidobacterium_pseudolongum	0.769158	0.798083
		Escherichia_coli	0.036104	0.062534
		Faecalibaculum_rodentium	0.622947	1.04931
		Lactobacillus_johnsonii	0.869516	0.386267
		Lactobacillus_reuteri	0.764358	0.237606
		Parabacteroides_distasonis	0	0
		Romboutsia_ilealis	0.034799	0.0602736
		Unclassified	3.98254	0.727647
3.4.11.5	0	Dorea_sp_5_2	0.0560853	0.0515966	0.0283616	Prolyl aminopeptidase
		Lachnospiraceae_bacterium_3_2	0.163316	0.23212
		Lactobacillus_intestinalis	0	0
		Lactobacillus_johnsonii	0.053982	0.0934996
		Lactobacillus_reuteri	0.144581	0.250421
		Unclassified	1.05372	0.4561
	0.3	Dorea_sp_5_2	0.119213	0.103519
		Lachnospiraceae_bacterium_3_2	0.127233	0.145793
		Lactobacillus_intestinalis	0	0
		Lactobacillus_johnsonii	0.0373363	0.0646684
		Lactobacillus_reuteri	0.0647433	0.112139
		Unclassified	1.80872	0.793202
	3	Dorea_sp_5_2	0.159644	0.0988989
		Lachnospiraceae_bacterium_3_2	0.389634	0.151482
		Lactobacillus_intestinalis	0.0385177	0.0667146
		Lactobacillus_johnsonii	0.132075	0.119583
		Lactobacillus_reuteri	0.249124	0.104265
		Unclassified	1.41982	0.278599
	30	Dorea_sp_5_2	0.0801097	0.0693862
		Lachnospiraceae_bacterium_3_2	0.103571	0.0897732
		Lactobacillus_intestinalis	1.59356	1.02675
		Lactobacillus_johnsonii	1.28743	0.27078
		Lactobacillus_reuteri	2.51417	0.292081
		Unclassified	0.678988	0.372995
2.7.1.36	0	Lactobacillus_johnsonii	0	0	0.0330559	Mevalonate kinase
		Lactobacillus_reuteri	0	0
		Unclassified	0.1998	0.218493
	0.3	Lactobacillus_johnsonii	0	0
		Lactobacillus_reuteri	0.0259347	0.0449202
		Unclassified	0.203456	0.105433
	3	Lactobacillus_johnsonii	0.0538247	0.0932271
		Lactobacillus_reuteri	0.0321587	0.0557004
		Unclassified	0	0
	30	Lactobacillus_johnsonii	0.650547	0.234926
		Lactobacillus_reuteri	0.61928	0.147963
		Unclassified	0.076675	0.0410217
2.4.2.6	0	Lactobacillus_johnsonii	0.0573033	0.0992523	0.0358417	Nucleoside deoxyribosyltransferase
		Lactobacillus_reuteri	0	0
	0.3	Lactobacillus_johnsonii	0.055487	0.0961063
		Lactobacillus_reuteri	0.0700587	0.121345
	3	Lactobacillus_johnsonii	0.238773	0.234998
		Lactobacillus_reuteri	0.0369537	0.0350432
	30	Lactobacillus_johnsonii	1.48734	0.46493
		Lactobacillus_reuteri	0.71587	0.117154
2.3.1.89	0	Bacteroides_thetaiotaomicron	0	0	0.0389208	Tetrahydrodipicolinate N-acetyltransferase
		Faecalibaculum_rodentium	0.0556967	0.0964695
		Lactobacillus_intestinalis	0	0
		Lactobacillus_johnsonii	0	0
		Lactobacillus_murinus	0.660632	0.177547
		Lactobacillus_reuteri	0	0
		Oscillibacter_sp_1_3	0.80328	0.436285
		Unclassified	1.45102	0.418032
	0.3	Bacteroides_thetaiotaomicron	0	0
		Faecalibaculum_rodentium	0	0
		Lactobacillus_intestinalis	0	0
		Lactobacillus_johnsonii	0.0416363	0.0721162
		Lactobacillus_murinus	0.279067	0.201576
		Lactobacillus_reuteri	0.0277493	0.0480633
		Oscillibacter_sp_1_3	0.602983	0.0166437
		Unclassified	1.45622	0.301357
	3	Bacteroides_thetaiotaomicron	0.0612877	0.106153
		Faecalibaculum_rodentium	0.038975	0.0675067
		Lactobacillus_intestinalis	0.004603	0.00797263
		Lactobacillus_johnsonii	0.113857	0.144297
		Lactobacillus_murinus	0.458366	0.426183
		Lactobacillus_reuteri	0.0591177	0.0711559
		Oscillibacter_sp_1_3	0.543179	0.215769
		Unclassified	1.87842	0.239997
	30	Bacteroides_thetaiotaomicron	0	0
		Faecalibaculum_rodentium	0.390294	0.611205
		Lactobacillus_intestinalis	0.237349	0.0604414
		Lactobacillus_johnsonii	0.990923	0.0452931
		Lactobacillus_murinus	0.173266	0.173863
		Lactobacillus_reuteri	0.995354	0.13412
		Oscillibacter_sp_1_3	0.614892	0.160367
		Unclassified	1.31667	0.216153
2.3.1.274	0	Akkermansia_muciniphila	0.27461	0.254089	0.0420113	Phosphate acyltransferase
		Lactobacillus_johnsonii	0	0
		Lactobacillus_reuteri	0	0
		Unclassified	0	0
	0.3	Akkermansia_muciniphila	0.0519413	0.089965
		Lactobacillus_johnsonii	0.0213327	0.0369493
		Lactobacillus_reuteri	0.0206113	0.0356999
		Unclassified	0	0
	3	Akkermansia_muciniphila	0.34302	0.594128
		Lactobacillus_johnsonii	0.0846423	0.146605
		Lactobacillus_reuteri	0.0380863	0.0659675
		Unclassified	0	0
	30	Akkermansia_muciniphila	0	0
		Lactobacillus_johnsonii	0.68704	0.304607
		Lactobacillus_reuteri	0.783201	0.227266
		Unclassified	0.00972433	0.016843
2.3.1.16	0	Enterobacter_cloacae_complex	0	0	0.0444583	Acetyl-CoA C-acyltransferase
		Escherichia_coli	0	0
		Lactobacillus_reuteri	0.0328467	0.0568921
		Unclassified	0.11982	0.0608815
	0.3	Enterobacter_cloacae_complex	0	0
		Escherichia_coli	0	0
		Lactobacillus_reuteri	0.0226033	0.0391501
		Unclassified	0.176878	0.0626711
	3	Enterobacter_cloacae_complex	0	0
		Escherichia_coli	0.0228073	0.0395035
		Lactobacillus_reuteri	0.0879033	0.152253
		Unclassified	0.361131	0.30458
	30	Enterobacter_cloacae_complex	0.00221333	0.00383361
		Escherichia_coli	0.344827	0.320176
		Lactobacillus_reuteri	1.03185	0.144485
		Unclassified	0.209202	0.0628821
3.1.26.8	0	Faecalibaculum_rodentium	0.211908	0.253468	0.0476585	Ribonuclease M5
		Lactobacillus_intestinalis	0	0
		Lactobacillus_johnsonii	0	0
		Lactobacillus_murinus	1.16227	0.256905
		Lactobacillus_reuteri	0.017986	0.0311527
		Romboutsia_ilealis	0	0
		Unclassified	0.0435517	0.0384589
	0.3	Faecalibaculum_rodentium	0.0881477	0.10692
		Lactobacillus_intestinalis	0	0
		Lactobacillus_johnsonii	0.0689143	0.119363
		Lactobacillus_murinus	0.475301	0.243784
		Lactobacillus_reuteri	0.01244	0.0215467
		Romboutsia_ilealis	0	0
		Unclassified	0.0618943	0.015492
	3	Faecalibaculum_rodentium	0.0611637	0.105939
		Lactobacillus_intestinalis	0.0737227	0.127691
		Lactobacillus_johnsonii	0.154353	0.239238
		Lactobacillus_murinus	0.850908	0.967707
		Lactobacillus_reuteri	0.085293	0.0937471
		Romboutsia_ilealis	0	0
		Unclassified	0.133674	0.186052
	30	Faecalibaculum_rodentium	0.464934	0.695046
		Lactobacillus_intestinalis	0.869338	0.636718
		Lactobacillus_johnsonii	1.27707	0.34428
		Lactobacillus_murinus	0.144928	0.140331
		Lactobacillus_reuteri	1.27215	0.206236
		Romboutsia_ilealis	0.0759933	0.131624
		Unclassified	0.443312	0.085274

## Sheet: Table S4
Table S4. Enzyme commission number(EC #) with species annotated to the mevalonate-dependent IPP pathway for fecal samples from patients with fibrosis (Group: healthy, compensated, and decompensated). Mean relative abundance for species respective to each EC id (copies per million reads, CPM), standard deviation [sd], n=3) are denoted in respective columns. Adjusted p-values (adj. p) were determin…
EC	Group	genus	species	mean CPM	sd	adj. p
1.1.1.88	compensated	Alloscardovia	Alloscardovia_omnicolens	0	0	9.99315e-05
1.1.1.88	compensated	Enterococcus	Enterococcus_faecalis	0.00642112	0.0444869	9.99315e-05
1.1.1.88	compensated	Eubacterium	Eubacterium_ramulus	0.0157166	0.108888	9.99315e-05
1.1.1.88	compensated	Firmicutes_unclassified	Firmicutes_bacterium_CAG_145	0	0	9.99315e-05
1.1.1.88	compensated	Firmicutes_unclassified	Firmicutes_bacterium_CAG_238	0	0	9.99315e-05
1.1.1.88	compensated	Flavonifractor	Flavonifractor_plautii	0.00946465	0.065573	9.99315e-05
1.1.1.88	compensated	Fusobacterium	Fusobacterium_ulcerans	0.213406	1.47852	9.99315e-05
1.1.1.88	compensated	Lactobacillus	Lactobacillus_crispatus	0	0	9.99315e-05
1.1.1.88	compensated	Lactobacillus	Lactobacillus_fermentum	0.169635	0.636146	9.99315e-05
1.1.1.88	compensated	Lactobacillus	Lactobacillus_gasseri	0	0	9.99315e-05
1.1.1.88	compensated	Lactobacillus	Lactobacillus_johnsonii	0	0	9.99315e-05
1.1.1.88	compensated	Lactobacillus	Lactobacillus_mucosae	0.839558	2.16828	9.99315e-05
1.1.1.88	compensated	Lactobacillus	Lactobacillus_oris	0	0	9.99315e-05
1.1.1.88	compensated	Lactobacillus	Lactobacillus_paragasseri	0	0	9.99315e-05
1.1.1.88	compensated	Lactobacillus	Lactobacillus_reuteri	0	0	9.99315e-05
1.1.1.88	compensated	Lactobacillus	Lactobacillus_ruminis	0	0	9.99315e-05
1.1.1.88	compensated	Lactobacillus	Lactobacillus_ruminis_CAG_367	0	0	9.99315e-05
1.1.1.88	compensated	Lactobacillus	Lactobacillus_salivarius	1.36898	3.97169	9.99315e-05
1.1.1.88	compensated	Lactobacillus	Lactobacillus_vaginalis	0	0	9.99315e-05
1.1.1.88	compensated	Lactococcus	Lactococcus_lactis	0.0043911	0.0304225	9.99315e-05
1.1.1.88	compensated	Leptotrichia	Leptotrichia_hofstadii	0	0	9.99315e-05
1.1.1.88	compensated	Leptotrichia	Leptotrichia_wadei	0	0	9.99315e-05
1.1.1.88	compensated	Staphylococcus	Staphylococcus_capitis	0.00795081	0.0550848	9.99315e-05
1.1.1.88	compensated	Streptococcus	Streptococcus_anginosus_group	0.176744	0.529535	9.99315e-05
1.1.1.88	compensated	Streptococcus	Streptococcus_australis	0.012927	0.0680077	9.99315e-05
1.1.1.88	compensated	Streptococcus	Streptococcus_cristatus	0.00599292	0.0415201	9.99315e-05
1.1.1.88	compensated	Streptococcus	Streptococcus_gordonii	0.0174347	0.0645791	9.99315e-05
1.1.1.88	compensated	Streptococcus	Streptococcus_infantarius	0.0574347	0.286594	9.99315e-05
1.1.1.88	compensated	Streptococcus	Streptococcus_infantis	0.071157	0.467421	9.99315e-05
1.1.1.88	compensated	Streptococcus	Streptococcus_lutetiensis	0.00974663	0.0675266	9.99315e-05
1.1.1.88	compensated	Streptococcus	Streptococcus_milleri	0.00443102	0.026759	9.99315e-05
1.1.1.88	compensated	Streptococcus	Streptococcus_mitis	0.0341057	0.227239	9.99315e-05
1.1.1.88	compensated	Streptococcus	Streptococcus_mutans	0.00800969	0.0554927	9.99315e-05
1.1.1.88	compensated	Streptococcus	Streptococcus_oralis	0.0506745	0.316553	9.99315e-05
1.1.1.88	compensated	Streptococcus	Streptococcus_pasteurianus	0.0399346	0.276675	9.99315e-05
1.1.1.88	compensated	Streptococcus	Streptococcus_peroris	0	0	9.99315e-05
1.1.1.88	compensated	Streptococcus	Streptococcus_salivarius	0.790239	1.94641	9.99315e-05
1.1.1.88	compensated	Streptococcus	Streptococcus_salivarius_CAG_79	3.18989	9.53413	9.99315e-05
1.1.1.88	compensated	Streptococcus	Streptococcus_sanguinis	0.00265525	0.0146956	9.99315e-05
1.1.1.88	compensated	Streptococcus	Streptococcus_sp_A12	0.00137546	0.00952945	9.99315e-05
1.1.1.88	compensated	Streptococcus	Streptococcus_sp_F0442	0.0416781	0.288755	9.99315e-05
1.1.1.88	compensated	Streptococcus	Streptococcus_sp_HMSC034E03	0.00815546	0.0565027	9.99315e-05
1.1.1.88	compensated	Streptococcus	Streptococcus_sp_HPH0090	0.037125	0.25721	9.99315e-05
1.1.1.88	compensated	Streptococcus	Streptococcus_sp_NLAE_zl_C503	0	0	9.99315e-05
1.1.1.88	compensated	Streptococcus	Streptococcus_thermophilus	0.030428	0.137689	9.99315e-05
1.1.1.88	compensated	Streptococcus	Streptococcus_thermophilus_CAG_236	0.0159456	0.0843224	9.99315e-05
1.1.1.88	compensated	Streptococcus	Streptococcus_vestibularis	0.384236	0.826146	9.99315e-05
1.1.1.88	compensated	Streptococcus	Streptococcus_viridans	0.00463371	0.0321033	9.99315e-05
1.1.1.88	compensated	unclassified	Unclassified	1.12027	1.27444	9.99315e-05
1.1.1.88	compensated	Weissella	Weissella_confusa	0.00902208	0.0442942	9.99315e-05
1.1.1.88	decompensated	Alloscardovia	Alloscardovia_omnicolens	0	0	0.000958702
1.1.1.88	decompensated	Enterococcus	Enterococcus_faecalis	0	0	0.000958702
1.1.1.88	decompensated	Eubacterium	Eubacterium_ramulus	0.010176	0.0505811	0.000958702
1.1.1.88	decompensated	Firmicutes_unclassified	Firmicutes_bacterium_CAG_145	0	0	0.000958702
1.1.1.88	decompensated	Firmicutes_unclassified	Firmicutes_bacterium_CAG_238	0	0	0.000958702
1.1.1.88	decompensated	Flavonifractor	Flavonifractor_plautii	0.003159	0.0209544	0.000958702
1.1.1.88	decompensated	Fusobacterium	Fusobacterium_ulcerans	0	0	0.000958702
1.1.1.88	decompensated	Lactobacillus	Lactobacillus_crispatus	0.00574941	0.0381373	0.000958702
1.1.1.88	decompensated	Lactobacillus	Lactobacillus_fermentum	0.0322042	0.178791	0.000958702
1.1.1.88	decompensated	Lactobacillus	Lactobacillus_gasseri	0.0253402	0.168088	0.000958702
1.1.1.88	decompensated	Lactobacillus	Lactobacillus_johnsonii	0	0	0.000958702
1.1.1.88	decompensated	Lactobacillus	Lactobacillus_mucosae	0.113838	0.349721	0.000958702
1.1.1.88	decompensated	Lactobacillus	Lactobacillus_oris	0.00871182	0.0403863	0.000958702
1.1.1.88	decompensated	Lactobacillus	Lactobacillus_paragasseri	0.0806259	0.381582	0.000958702
1.1.1.88	decompensated	Lactobacillus	Lactobacillus_reuteri	0.0305207	0.202451	0.000958702
1.1.1.88	decompensated	Lactobacillus	Lactobacillus_ruminis	0	0	0.000958702
1.1.1.88	decompensated	Lactobacillus	Lactobacillus_ruminis_CAG_367	0	0	0.000958702
1.1.1.88	decompensated	Lactobacillus	Lactobacillus_salivarius	2.3423	7.86643	0.000958702
1.1.1.88	decompensated	Lactobacillus	Lactobacillus_vaginalis	0.00400189	0.0265455	0.000958702
1.1.1.88	decompensated	Lactococcus	Lactococcus_lactis	0	0	0.000958702
1.1.1.88	decompensated	Leptotrichia	Leptotrichia_hofstadii	0	0	0.000958702
1.1.1.88	decompensated	Leptotrichia	Leptotrichia_wadei	0.0676238	0.425059	0.000958702
1.1.1.88	decompensated	Staphylococcus	Staphylococcus_capitis	0	0	0.000958702
1.1.1.88	decompensated	Streptococcus	Streptococcus_anginosus_group	0.270248	0.594014	0.000958702
1.1.1.88	decompensated	Streptococcus	Streptococcus_australis	0.0134379	0.0891367	0.000958702
1.1.1.88	decompensated	Streptococcus	Streptococcus_cristatus	0.0115377	0.0765326	0.000958702
1.1.1.88	decompensated	Streptococcus	Streptococcus_gordonii	0.00299984	0.0143627	0.000958702
1.1.1.88	decompensated	Streptococcus	Streptococcus_infantarius	0	0	0.000958702
1.1.1.88	decompensated	Streptococcus	Streptococcus_infantis	0.00997157	0.0661439	0.000958702
1.1.1.88	decompensated	Streptococcus	Streptococcus_lutetiensis	0	0	0.000958702
1.1.1.88	decompensated	Streptococcus	Streptococcus_milleri	0	0	0.000958702
1.1.1.88	decompensated	Streptococcus	Streptococcus_mitis	0.00851261	0.0291178	0.000958702
1.1.1.88	decompensated	Streptococcus	Streptococcus_mutans	0.00701239	0.0465149	0.000958702
1.1.1.88	decompensated	Streptococcus	Streptococcus_oralis	0.0451684	0.162651	0.000958702
1.1.1.88	decompensated	Streptococcus	Streptococcus_pasteurianus	0.0114606	0.076021	0.000958702
1.1.1.88	decompensated	Streptococcus	Streptococcus_peroris	0	0	0.000958702
1.1.1.88	decompensated	Streptococcus	Streptococcus_salivarius	0.424589	0.788308	0.000958702
1.1.1.88	decompensated	Streptococcus	Streptococcus_salivarius_CAG_79	1.32936	2.61609	0.000958702
1.1.1.88	decompensated	Streptococcus	Streptococcus_sanguinis	0.00188252	0.0124872	0.000958702
1.1.1.88	decompensated	Streptococcus	Streptococcus_sp_A12	0	0	0.000958702
1.1.1.88	decompensated	Streptococcus	Streptococcus_sp_F0442	0.0818688	0.335971	0.000958702
1.1.1.88	decompensated	Streptococcus	Streptococcus_sp_HMSC034E03	0	0	0.000958702
1.1.1.88	decompensated	Streptococcus	Streptococcus_sp_HPH0090	0.00269764	0.0178941	0.000958702
1.1.1.88	decompensated	Streptococcus	Streptococcus_sp_NLAE_zl_C503	0.00198525	0.0131687	0.000958702
1.1.1.88	decompensated	Streptococcus	Streptococcus_thermophilus	0	0	0.000958702
1.1.1.88	decompensated	Streptococcus	Streptococcus_thermophilus_CAG_236	0	0	0.000958702
1.1.1.88	decompensated	Streptococcus	Streptococcus_vestibularis	0.234366	0.43532	0.000958702
1.1.1.88	decompensated	Streptococcus	Streptococcus_viridans	0	0	0.000958702
1.1.1.88	decompensated	unclassified	Unclassified	0.555044	0.898931	0.000958702
1.1.1.88	decompensated	Weissella	Weissella_confusa	0	0	0.000958702
1.1.1.88	healthy	Alloscardovia	Alloscardovia_omnicolens	0	0	ND
1.1.1.88	healthy	Enterococcus	Enterococcus_faecalis	0	0	ND
1.1.1.88	healthy	Eubacterium	Eubacterium_ramulus	0.0264027	0.12969	ND
1.1.1.88	healthy	Firmicutes_unclassified	Firmicutes_bacterium_CAG_145	0	0	ND
1.1.1.88	healthy	Firmicutes_unclassified	Firmicutes_bacterium_CAG_238	0.00419033	0.0302169	ND
1.1.1.88	healthy	Flavonifractor	Flavonifractor_plautii	0.0437113	0.22094	ND
1.1.1.88	healthy	Fusobacterium	Fusobacterium_ulcerans	0.00469367	0.0338466	ND
1.1.1.88	healthy	Lactobacillus	Lactobacillus_crispatus	0	0	ND
1.1.1.88	healthy	Lactobacillus	Lactobacillus_fermentum	0	0	ND
1.1.1.88	healthy	Lactobacillus	Lactobacillus_gasseri	0	0	ND
1.1.1.88	healthy	Lactobacillus	Lactobacillus_johnsonii	0	0	ND
1.1.1.88	healthy	Lactobacillus	Lactobacillus_mucosae	0	0	ND
1.1.1.88	healthy	Lactobacillus	Lactobacillus_oris	0	0	ND
1.1.1.88	healthy	Lactobacillus	Lactobacillus_paragasseri	0	0	ND
1.1.1.88	healthy	Lactobacillus	Lactobacillus_reuteri	0	0	ND
1.1.1.88	healthy	Lactobacillus	Lactobacillus_ruminis	0.0165419	0.0840283	ND
1.1.1.88	healthy	Lactobacillus	Lactobacillus_ruminis_CAG_367	0.0189863	0.0966015	ND
1.1.1.88	healthy	Lactobacillus	Lactobacillus_salivarius	0.0128104	0.0923774	ND
1.1.1.88	healthy	Lactobacillus	Lactobacillus_vaginalis	0	0	ND
1.1.1.88	healthy	Lactococcus	Lactococcus_lactis	0	0	ND
1.1.1.88	healthy	Leptotrichia	Leptotrichia_hofstadii	0	0	ND
1.1.1.88	healthy	Leptotrichia	Leptotrichia_wadei	0	0	ND
1.1.1.88	healthy	Staphylococcus	Staphylococcus_capitis	0	0	ND
1.1.1.88	healthy	Streptococcus	Streptococcus_anginosus_group	0	0	ND
1.1.1.88	healthy	Streptococcus	Streptococcus_australis	0.0055734	0.0401904	ND
1.1.1.88	healthy	Streptococcus	Streptococcus_cristatus	0	0	ND
1.1.1.88	healthy	Streptococcus	Streptococcus_gordonii	0	0	ND
1.1.1.88	healthy	Streptococcus	Streptococcus_infantarius	0	0	ND
1.1.1.88	healthy	Streptococcus	Streptococcus_infantis	0	0	ND
1.1.1.88	healthy	Streptococcus	Streptococcus_lutetiensis	0	0	ND
1.1.1.88	healthy	Streptococcus	Streptococcus_milleri	0	0	ND
1.1.1.88	healthy	Streptococcus	Streptococcus_mitis	0	0	ND
1.1.1.88	healthy	Streptococcus	Streptococcus_mutans	0	0	ND
1.1.1.88	healthy	Streptococcus	Streptococcus_oralis	0	0	ND
1.1.1.88	healthy	Streptococcus	Streptococcus_pasteurianus	0	0	ND
1.1.1.88	healthy	Streptococcus	Streptococcus_peroris	0	0	ND
1.1.1.88	healthy	Streptococcus	Streptococcus_salivarius	0.0141439	0.0417492	ND
1.1.1.88	healthy	Streptococcus	Streptococcus_salivarius_CAG_79	0.0942816	0.298779	ND
1.1.1.88	healthy	Streptococcus	Streptococcus_sanguinis	0	0	ND
1.1.1.88	healthy	Streptococcus	Streptococcus_sp_A12	0.00167231	0.0120592	ND
1.1.1.88	healthy	Streptococcus	Streptococcus_sp_F0442	0	0	ND
1.1.1.88	healthy	Streptococcus	Streptococcus_sp_HMSC034E03	0	0	ND
1.1.1.88	healthy	Streptococcus	Streptococcus_sp_HPH0090	0	0	ND
1.1.1.88	healthy	Streptococcus	Streptococcus_sp_NLAE_zl_C503	0	0	ND
1.1.1.88	healthy	Streptococcus	Streptococcus_thermophilus	0.00879937	0.0372342	ND
1.1.1.88	healthy	Streptococcus	Streptococcus_thermophilus_CAG_236	0.00232206	0.0131711	ND
1.1.1.88	healthy	Streptococcus	Streptococcus_vestibularis	0	0	ND
1.1.1.88	healthy	Streptococcus	Streptococcus_viridans	0	0	ND
1.1.1.88	healthy	unclassified	Unclassified	0.0933621	0.301594	ND
1.1.1.88	healthy	Weissella	Weissella_confusa	0	0	ND
2.3.1.9	compensated	Acidaminococcus	Acidaminococcus_sp_CAG_542	0.0432094	0.299363	0.125391
2.3.1.9	compensated	Aeromonas	Aeromonas_allosaccharophila	0	0	0.125391
2.3.1.9	compensated	Aeromonas	Aeromonas_caviae	0	0	0.125391
2.3.1.9	compensated	Aeromonas	Aeromonas_media	0	0	0.125391
2.3.1.9	compensated	Aeromonas	Aeromonas_veronii	0	0	0.125391
2.3.1.9	compensated	Anaerostipes	Anaerostipes_hadrus	0.111733	0.258691	0.125391
2.3.1.9	compensated	Butyricimonas	Butyricimonas_virosa	0.151096	0.612312	0.125391
2.3.1.9	compensated	Citrobacter	Citrobacter_braakii	0.00665473	0.0338909	0.125391
2.3.1.9	compensated	Citrobacter	Citrobacter_europaeus	0	0	0.125391
2.3.1.9	compensated	Citrobacter	Citrobacter_freundii	0.00767204	0.0376142	0.125391
2.3.1.9	compensated	Citrobacter	Citrobacter_koseri	0	0	0.125391
2.3.1.9	compensated	Citrobacter	Citrobacter_portucalensis	0.0235716	0.101883	0.125391
2.3.1.9	compensated	Citrobacter	Citrobacter_werkmanii	0	0	0.125391
2.3.1.9	compensated	Citrobacter	Citrobacter_youngae	0.0092216	0.0467487	0.125391
2.3.1.9	compensated	Clostridioides	Clostridioides_difficile	0.0119137	0.0825407	0.125391
2.3.1.9	compensated	Clostridium	Clostridium_baratii	0	0	0.125391
2.3.1.9	compensated	Clostridium	Clostridium_butyricum	0.0716956	0.496722	0.125391
2.3.1.9	compensated	Clostridium	Clostridium_celatum	0.00747613	0.0307639	0.125391
2.3.1.9	compensated	Clostridium	Clostridium_disporicum	0.141101	0.465789	0.125391
2.3.1.9	compensated	Erysipelatoclostridium	Clostridium_innocuum	0.0565136	0.221399	0.125391
2.3.1.9	compensated	Clostridium	Clostridium_perfringens	0.322419	1.14742	0.125391
2.3.1.9	compensated	Clostridium	Clostridium_sp_7_2_43FAA	0.00911752	0.063168	0.125391
2.3.1.9	compensated	Clostridium	Clostridium_ventriculi	0.00734652	0.0508982	0.125391
2.3.1.9	compensated	Comamonas	Comamonas_kerstersii	0.0538615	0.278606	0.125391
2.3.1.9	compensated	Coprococcus	Coprococcus_catus	0.00407494	0.028232	0.125391
2.3.1.9	compensated	Enterobacter	Enterobacter_cloacae_complex	0.0241262	0.120118	0.125391
2.3.1.9	compensated	Enterobacter	Enterobacter_mori	0.00235098	0.0162881	0.125391
2.3.1.9	compensated	Enterococcus	Enterococcus_faecalis	0.00512044	0.0354754	0.125391
2.3.1.9	compensated	Escherichia	Escherichia_coli	2.5695	5.21187	0.125391
2.3.1.9	compensated	Eubacterium	Eubacterium_hallii	0.118467	0.279577	0.125391
2.3.1.9	compensated	Eubacterium	Eubacterium_hallii_CAG_12	0.105507	0.210813	0.125391
2.3.1.9	compensated	Eubacterium	Eubacterium_ramulus	0.0842043	0.42627	0.125391
2.3.1.9	compensated	Lachnospiraceae_unclassified	Eubacterium_rectale	0.822288	2.01451	0.125391
2.3.1.9	compensated	Faecalibacterium	Faecalibacterium_prausnitzii	7.92457	9.04991	0.125391
2.3.1.9	compensated	Faecalitalea	Faecalitalea_cylindroides	0	0	0.125391
2.3.1.9	compensated	Flavonifractor	Flavonifractor_plautii	1.02584	1.51978	0.125391
2.3.1.9	compensated	Flavonifractor	Flavonifractor_sp_An100	0	0	0.125391
2.3.1.9	compensated	Fusobacterium	Fusobacterium_gonidiaformans	0	0	0.125391
2.3.1.9	compensated	Fusobacterium	Fusobacterium_hwasookii	0.0148971	0.0779147	0.125391
2.3.1.9	compensated	Fusobacterium	Fusobacterium_nucleatum	0.0591493	0.332664	0.125391
2.3.1.9	compensated	Fusobacterium	Fusobacterium_periodonticum	0.0563799	0.224381	0.125391
2.3.1.9	compensated	Fusobacterium	Fusobacterium_sp_oral_taxon_370	0.00916248	0.0634795	0.125391
2.3.1.9	compensated	Gemmiger	Gemmiger_formicilis	0.7496	1.62878	0.125391
2.3.1.9	compensated	Hungatella	Hungatella_hathewayi	0.0036104	0.0228029	0.125391
2.3.1.9	compensated	Intestinimonas	Intestinimonas_butyriciproducens	0.124475	0.495424	0.125391
2.3.1.9	compensated	Klebsiella	Klebsiella_aerogenes	0.090081	0.578491	0.125391
2.3.1.9	compensated	Klebsiella	Klebsiella_michiganensis	0	0	0.125391
2.3.1.9	compensated	Klebsiella	Klebsiella_oxytoca	0	0	0.125391
2.3.1.9	compensated	Klebsiella	Klebsiella_pneumoniae	3.86151	17.6584	0.125391
2.3.1.9	compensated	Klebsiella	Klebsiella_quasipneumoniae	0.0333768	0.157798	0.125391
2.3.1.9	compensated	Klebsiella	Klebsiella_variicola	0.0188303	0.086466	0.125391
2.3.1.9	compensated	Klebsiella	Klebsiella_variicola_CAG_634	0.00965996	0.0387576	0.125391
2.3.1.9	compensated	Kluyvera	Kluyvera_ascorbata	0	0	0.125391
2.3.1.9	compensated	Kluyvera	Kluyvera_georgiana	0	0	0.125391
2.3.1.9	compensated	Lactobacillus	Lactobacillus_equicursoris	0	0	0.125391
2.3.1.9	compensated	Lactobacillus	Lactobacillus_gasseri	0	0	0.125391
2.3.1.9	compensated	Lactobacillus	Lactobacillus_johnsonii	0	0	0.125391
2.3.1.9	compensated	Lactobacillus	Lactobacillus_paragasseri	0	0	0.125391
2.3.1.9	compensated	Lactobacillus	Lactobacillus_reuteri	0	0	0.125391
2.3.1.9	compensated	Lactococcus	Lactococcus_lactis	0.0120338	0.0833724	0.125391
2.3.1.9	compensated	Lawsonibacter	Lawsonibacter_asaccharolyticus	0.0175264	0.0911976	0.125391
2.3.1.9	compensated	Leclercia	Leclercia_adecarboxylata	0	0	0.125391
2.3.1.9	compensated	Megasphaera	Megasphaera_elsdenii	0.862681	5.50558	0.125391
2.3.1.9	compensated	Morganella	Morganella_morganii	0.00510298	0.0353545	0.125391
2.3.1.9	compensated	Pyramidobacter	Pyramidobacter_piscolens	0.0063121	0.0437315	0.125391
2.3.1.9	compensated	Pyramidobacter	Pyramidobacter_sp_C12_8	0.00111123	0.00769882	0.125391
2.3.1.9	compensated	Raoultella	Raoultella_ornithinolytica	0.000651229	0.00451185	0.125391
2.3.1.9	compensated	Raoultella	Raoultella_planticola	0	0	0.125391
2.3.1.9	compensated	Roseburia	Roseburia_faecis	1.5461	3.27047	0.125391
2.3.1.9	compensated	Roseburia	Roseburia_hominis	0.233835	0.541335	0.125391
2.3.1.9	compensated	Roseburia	Roseburia_intestinalis	0.949987	3.28732	0.125391
2.3.1.9	compensated	Roseburia	Roseburia_intestinalis_CAG_13	0.756045	2.57645	0.125391
2.3.1.9	compensated	Roseburia	Roseburia_inulinivorans	0.927563	1.55658	0.125391
2.3.1.9	compensated	Roseburia	Roseburia_inulinivorans_CAG_15	1.13214	2.00777	0.125391
2.3.1.9	compensated	Roseburia	Roseburia_sp_CAG_182	0	0	0.125391
2.3.1.9	compensated	Blautia	Ruminococcus_torques	0.457098	1.16451	0.125391
2.3.1.9	compensated	Sanguibacteroides	Sanguibacteroides_justesenii	0	0	0.125391
2.3.1.9	compensated	Staphylococcus	Staphylococcus_aureus	0	0	0.125391
2.3.1.9	compensated	Streptococcus	Streptococcus_anginosus_group	0.13126	0.332888	0.125391
2.3.1.9	compensated	Streptococcus	Streptococcus_cristatus	0.00706456	0.0363166	0.125391
2.3.1.9	compensated	Streptococcus	Streptococcus_infantis	0.0851559	0.547459	0.125391
2.3.1.9	compensated	Streptococcus	Streptococcus_milleri	0.00391006	0.0176177	0.125391
2.3.1.9	compensated	Streptococcus	Streptococcus_mitis	0.16513	0.596466	0.125391
2.3.1.9	compensated	Streptococcus	Streptococcus_oralis	0.0373615	0.183474	0.125391
2.3.1.9	compensated	Streptococcus	Streptococcus_sp_NLAE_zl_C503	0	0	0.125391
2.3.1.9	compensated	Streptococcus	Streptococcus_viridans	0.036132	0.147273	0.125391
2.3.1.9	compensated	unclassified	Unclassified	4.42692	4.93628	0.125391
2.3.1.9	decompensated	Acidaminococcus	Acidaminococcus_sp_CAG_542	0	0	0.860727
2.3.1.9	decompensated	Aeromonas	Aeromonas_allosaccharophila	0.0105786	0.0491751	0.860727
2.3.1.9	decompensated	Aeromonas	Aeromonas_caviae	0.00284377	0.0188635	0.860727
2.3.1.9	decompensated	Aeromonas	Aeromonas_media	0.00885782	0.0587561	0.860727
2.3.1.9	decompensated	Aeromonas	Aeromonas_veronii	0.0739441	0.321041	0.860727
2.3.1.9	decompensated	Anaerostipes	Anaerostipes_hadrus	0.190448	0.572714	0.860727
2.3.1.9	decompensated	Butyricimonas	Butyricimonas_virosa	0.0348736	0.143368	0.860727
2.3.1.9	decompensated	Citrobacter	Citrobacter_braakii	0.00537223	0.0314521	0.860727
2.3.1.9	decompensated	Citrobacter	Citrobacter_europaeus	0.00233241	0.0154715	0.860727
2.3.1.9	decompensated	Citrobacter	Citrobacter_freundii	0.0230806	0.110845	0.860727
2.3.1.9	decompensated	Citrobacter	Citrobacter_koseri	0	0	0.860727
2.3.1.9	decompensated	Citrobacter	Citrobacter_portucalensis	0.00873532	0.0579435	0.860727
2.3.1.9	decompensated	Citrobacter	Citrobacter_werkmanii	0.000665182	0.00441232	0.860727
2.3.1.9	decompensated	Citrobacter	Citrobacter_youngae	0.0192019	0.0953618	0.860727
2.3.1.9	decompensated	Clostridioides	Clostridioides_difficile	0	0	0.860727
2.3.1.9	decompensated	Clostridium	Clostridium_baratii	0.018784	0.124599	0.860727
2.3.1.9	decompensated	Clostridium	Clostridium_butyricum	0	0	0.860727
2.3.1.9	decompensated	Clostridium	Clostridium_celatum	0.00471848	0.0312988	0.860727
2.3.1.9	decompensated	Clostridium	Clostridium_disporicum	0.0221987	0.147249	0.860727
2.3.1.9	decompensated	Erysipelatoclostridium	Clostridium_innocuum	0.00277807	0.0184276	0.860727
2.3.1.9	decompensated	Clostridium	Clostridium_perfringens	0.28888	0.838851	0.860727
2.3.1.9	decompensated	Clostridium	Clostridium_sp_7_2_43FAA	0	0	0.860727
2.3.1.9	decompensated	Clostridium	Clostridium_ventriculi	0	0	0.860727
2.3.1.9	decompensated	Comamonas	Comamonas_kerstersii	0.0133446	0.0647836	0.860727
2.3.1.9	decompensated	Coprococcus	Coprococcus_catus	0.00432905	0.0287156	0.860727
2.3.1.9	decompensated	Enterobacter	Enterobacter_cloacae_complex	0.050496	0.308247	0.860727
2.3.1.9	decompensated	Enterobacter	Enterobacter_mori	0	0	0.860727
2.3.1.9	decompensated	Enterococcus	Enterococcus_faecalis	0	0	0.860727
2.3.1.9	decompensated	Escherichia	Escherichia_coli	14.7348	34.5036	0.860727
2.3.1.9	decompensated	Eubacterium	Eubacterium_hallii	0.0473372	0.100047	0.860727
2.3.1.9	decompensated	Eubacterium	Eubacterium_hallii_CAG_12	0.0401115	0.0795125	0.860727
2.3.1.9	decompensated	Eubacterium	Eubacterium_ramulus	0.0652546	0.373309	0.860727
2.3.1.9	decompensated	Lachnospiraceae_unclassified	Eubacterium_rectale	0.995799	2.99025	0.860727
2.3.1.9	decompensated	Faecalibacterium	Faecalibacterium_prausnitzii	10.5877	9.08765	0.860727
2.3.1.9	decompensated	Faecalitalea	Faecalitalea_cylindroides	0	0	0.860727
2.3.1.9	decompensated	Flavonifractor	Flavonifractor_plautii	0.283696	0.414974	0.860727
2.3.1.9	decompensated	Flavonifractor	Flavonifractor_sp_An100	0	0	0.860727
2.3.1.9	decompensated	Fusobacterium	Fusobacterium_gonidiaformans	0.00514959	0.0341585	0.860727
2.3.1.9	decompensated	Fusobacterium	Fusobacterium_hwasookii	0.0153761	0.101993	0.860727
2.3.1.9	decompensated	Fusobacterium	Fusobacterium_nucleatum	0.196393	0.758675	0.860727
2.3.1.9	decompensated	Fusobacterium	Fusobacterium_periodonticum	0.0291967	0.144024	0.860727
2.3.1.9	decompensated	Fusobacterium	Fusobacterium_sp_oral_taxon_370	0.00965495	0.0460578	0.860727
2.3.1.9	decompensated	Gemmiger	Gemmiger_formicilis	0.437737	0.8068	0.860727
2.3.1.9	decompensated	Hungatella	Hungatella_hathewayi	0.0127632	0.0474546	0.860727
2.3.1.9	decompensated	Intestinimonas	Intestinimonas_butyriciproducens	0.14308	0.855969	0.860727
2.3.1.9	decompensated	Klebsiella	Klebsiella_aerogenes	0	0	0.860727
2.3.1.9	decompensated	Klebsiella	Klebsiella_michiganensis	0.0102599	0.0486695	0.860727
2.3.1.9	decompensated	Klebsiella	Klebsiella_oxytoca	0.628076	2.72954	0.860727
2.3.1.9	decompensated	Klebsiella	Klebsiella_pneumoniae	5.96246	19.636	0.860727
2.3.1.9	decompensated	Klebsiella	Klebsiella_quasipneumoniae	0.0239366	0.0962829	0.860727
2.3.1.9	decompensated	Klebsiella	Klebsiella_variicola	0.16728	0.653339	0.860727
2.3.1.9	decompensated	Klebsiella	Klebsiella_variicola_CAG_634	0.0659749	0.396224	0.860727
2.3.1.9	decompensated	Kluyvera	Kluyvera_ascorbata	0.00130509	0.00865699	0.860727
2.3.1.9	decompensated	Kluyvera	Kluyvera_georgiana	0.001334	0.00884875	0.860727
2.3.1.9	decompensated	Lactobacillus	Lactobacillus_equicursoris	0.0296378	0.137484	0.860727
2.3.1.9	decompensated	Lactobacillus	Lactobacillus_gasseri	0.034043	0.225815	0.860727
2.3.1.9	decompensated	Lactobacillus	Lactobacillus_johnsonii	0	0	0.860727
2.3.1.9	decompensated	Lactobacillus	Lactobacillus_paragasseri	0.0608889	0.283622	0.860727
2.3.1.9	decompensated	Lactobacillus	Lactobacillus_reuteri	0.0423636	0.281009	0.860727
2.3.1.9	decompensated	Lactococcus	Lactococcus_lactis	0	0	0.860727
2.3.1.9	decompensated	Lawsonibacter	Lawsonibacter_asaccharolyticus	0	0	0.860727
2.3.1.9	decompensated	Leclercia	Leclercia_adecarboxylata	0.00134936	0.00895067	0.860727
2.3.1.9	decompensated	Megasphaera	Megasphaera_elsdenii	0.008829	0.058565	0.860727
2.3.1.9	decompensated	Morganella	Morganella_morganii	0	0	0.860727
2.3.1.9	decompensated	Pyramidobacter	Pyramidobacter_piscolens	0	0	0.860727
2.3.1.9	decompensated	Pyramidobacter	Pyramidobacter_sp_C12_8	0	0	0.860727
2.3.1.9	decompensated	Raoultella	Raoultella_ornithinolytica	0.00920634	0.061068	0.860727
2.3.1.9	decompensated	Raoultella	Raoultella_planticola	0.0013352	0.00885674	0.860727
2.3.1.9	decompensated	Roseburia	Roseburia_faecis	0.975726	3.56058	0.860727
2.3.1.9	decompensated	Roseburia	Roseburia_hominis	0.355126	1.04067	0.860727
2.3.1.9	decompensated	Roseburia	Roseburia_intestinalis	0.31229	0.76592	0.860727
2.3.1.9	decompensated	Roseburia	Roseburia_intestinalis_CAG_13	0.227368	0.528392	0.860727
2.3.1.9	decompensated	Roseburia	Roseburia_inulinivorans	1.77786	2.26816	0.860727
2.3.1.9	decompensated	Roseburia	Roseburia_inulinivorans_CAG_15	2.07211	2.83181	0.860727
2.3.1.9	decompensated	Roseburia	Roseburia_sp_CAG_182	0	0	0.860727
2.3.1.9	decompensated	Blautia	Ruminococcus_torques	0.444724	0.951459	0.860727
2.3.1.9	decompensated	Sanguibacteroides	Sanguibacteroides_justesenii	0	0	0.860727
2.3.1.9	decompensated	Staphylococcus	Staphylococcus_aureus	0	0	0.860727
2.3.1.9	decompensated	Streptococcus	Streptococcus_anginosus_group	0.202174	0.451706	0.860727
2.3.1.9	decompensated	Streptococcus	Streptococcus_cristatus	0.00669668	0.0444208	0.860727
2.3.1.9	decompensated	Streptococcus	Streptococcus_infantis	0.010098	0.0382787	0.860727
2.3.1.9	decompensated	Streptococcus	Streptococcus_milleri	0.00325361	0.021582	0.860727
2.3.1.9	decompensated	Streptococcus	Streptococcus_mitis	0.0886518	0.283129	0.860727
2.3.1.9	decompensated	Streptococcus	Streptococcus_oralis	0.016417	0.0373742	0.860727
2.3.1.9	decompensated	Streptococcus	Streptococcus_sp_NLAE_zl_C503	0.00324066	0.0214961	0.860727
2.3.1.9	decompensated	Streptococcus	Streptococcus_viridans	0	0	0.860727
2.3.1.9	decompensated	unclassified	Unclassified	3.29529	2.74207	0.860727
2.3.1.9	healthy	Acidaminococcus	Acidaminococcus_sp_CAG_542	0	0	ND
2.3.1.9	healthy	Aeromonas	Aeromonas_allosaccharophila	0	0	ND
2.3.1.9	healthy	Aeromonas	Aeromonas_caviae	0	0	ND
2.3.1.9	healthy	Aeromonas	Aeromonas_media	0	0	ND
2.3.1.9	healthy	Aeromonas	Aeromonas_veronii	0	0	ND
2.3.1.9	healthy	Anaerostipes	Anaerostipes_hadrus	0.354205	0.747905	ND
2.3.1.9	healthy	Butyricimonas	Butyricimonas_virosa	0.393253	0.617505	ND
2.3.1.9	healthy	Citrobacter	Citrobacter_braakii	0.0065264	0.0470626	ND
2.3.1.9	healthy	Citrobacter	Citrobacter_europaeus	0	0	ND
2.3.1.9	healthy	Citrobacter	Citrobacter_freundii	0.000869	0.00626645	ND
2.3.1.9	healthy	Citrobacter	Citrobacter_koseri	0	0	ND
2.3.1.9	healthy	Citrobacter	Citrobacter_portucalensis	0.00986192	0.0513737	ND
2.3.1.9	healthy	Citrobacter	Citrobacter_werkmanii	0	0	ND
2.3.1.9	healthy	Citrobacter	Citrobacter_youngae	0.00348177	0.0196859	ND
2.3.1.9	healthy	Clostridioides	Clostridioides_difficile	0	0	ND
2.3.1.9	healthy	Clostridium	Clostridium_baratii	0	0	ND
2.3.1.9	healthy	Clostridium	Clostridium_butyricum	0	0	ND
2.3.1.9	healthy	Clostridium	Clostridium_celatum	0	0	ND
2.3.1.9	healthy	Clostridium	Clostridium_disporicum	0.044247	0.207683	ND
2.3.1.9	healthy	Erysipelatoclostridium	Clostridium_innocuum	0	0	ND
2.3.1.9	healthy	Clostridium	Clostridium_perfringens	0	0	ND
2.3.1.9	healthy	Clostridium	Clostridium_sp_7_2_43FAA	0	0	ND
2.3.1.9	healthy	Clostridium	Clostridium_ventriculi	0	0	ND
2.3.1.9	healthy	Comamonas	Comamonas_kerstersii	0.0105574	0.0761305	ND
2.3.1.9	healthy	Coprococcus	Coprococcus_catus	0.0247396	0.132932	ND
2.3.1.9	healthy	Enterobacter	Enterobacter_cloacae_complex	0.010013	0.0612394	ND
2.3.1.9	healthy	Enterobacter	Enterobacter_mori	0	0	ND
2.3.1.9	healthy	Enterococcus	Enterococcus_faecalis	0	0	ND
2.3.1.9	healthy	Escherichia	Escherichia_coli	2.98529	8.1754	ND
2.3.1.9	healthy	Eubacterium	Eubacterium_hallii	0.264355	0.298513	ND
2.3.1.9	healthy	Eubacterium	Eubacterium_hallii_CAG_12	0.228315	0.234766	ND
2.3.1.9	healthy	Eubacterium	Eubacterium_ramulus	0.21447	0.616777	ND
2.3.1.9	healthy	Lachnospiraceae_unclassified	Eubacterium_rectale	2.07041	2.42713	ND
2.3.1.9	healthy	Faecalibacterium	Faecalibacterium_prausnitzii	10.1996	7.76591	ND
2.3.1.9	healthy	Faecalitalea	Faecalitalea_cylindroides	0.002091	0.0150784	ND
2.3.1.9	healthy	Flavonifractor	Flavonifractor_plautii	0.915846	1.7803	ND
2.3.1.9	healthy	Flavonifractor	Flavonifractor_sp_An100	0	0	ND
2.3.1.9	healthy	Fusobacterium	Fusobacterium_gonidiaformans	0	0	ND
2.3.1.9	healthy	Fusobacterium	Fusobacterium_hwasookii	0	0	ND
2.3.1.9	healthy	Fusobacterium	Fusobacterium_nucleatum	0	0	ND
2.3.1.9	healthy	Fusobacterium	Fusobacterium_periodonticum	0	0	ND
2.3.1.9	healthy	Fusobacterium	Fusobacterium_sp_oral_taxon_370	0	0	ND
2.3.1.9	healthy	Gemmiger	Gemmiger_formicilis	1.97862	1.7816	ND
2.3.1.9	healthy	Hungatella	Hungatella_hathewayi	0	0	ND
2.3.1.9	healthy	Intestinimonas	Intestinimonas_butyriciproducens	0.118707	0.337812	ND
2.3.1.9	healthy	Klebsiella	Klebsiella_aerogenes	0	0	ND
2.3.1.9	healthy	Klebsiella	Klebsiella_michiganensis	0.00958127	0.0690915	ND
2.3.1.9	healthy	Klebsiella	Klebsiella_oxytoca	0	0	ND
2.3.1.9	healthy	Klebsiella	Klebsiella_pneumoniae	1.13631	5.31086	ND
2.3.1.9	healthy	Klebsiella	Klebsiella_quasipneumoniae	0.0135443	0.0442447	ND
2.3.1.9	healthy	Klebsiella	Klebsiella_variicola	0.0325	0.169543	ND
2.3.1.9	healthy	Klebsiella	Klebsiella_variicola_CAG_634	0.0290442	0.150121	ND
2.3.1.9	healthy	Kluyvera	Kluyvera_ascorbata	0	0	ND
2.3.1.9	healthy	Kluyvera	Kluyvera_georgiana	0	0	ND
2.3.1.9	healthy	Lactobacillus	Lactobacillus_equicursoris	0	0	ND
2.3.1.9	healthy	Lactobacillus	Lactobacillus_gasseri	0	0	ND
2.3.1.9	healthy	Lactobacillus	Lactobacillus_johnsonii	0	0	ND
2.3.1.9	healthy	Lactobacillus	Lactobacillus_paragasseri	0	0	ND
2.3.1.9	healthy	Lactobacillus	Lactobacillus_reuteri	0	0	ND
2.3.1.9	healthy	Lactococcus	Lactococcus_lactis	0	0	ND
2.3.1.9	healthy	Lawsonibacter	Lawsonibacter_asaccharolyticus	0.130483	0.346824	ND
2.3.1.9	healthy	Leclercia	Leclercia_adecarboxylata	0	0	ND
2.3.1.9	healthy	Megasphaera	Megasphaera_elsdenii	0.021988	0.118232	ND
2.3.1.9	healthy	Morganella	Morganella_morganii	0	0	ND
2.3.1.9	healthy	Pyramidobacter	Pyramidobacter_piscolens	0.0620204	0.316307	ND
2.3.1.9	healthy	Pyramidobacter	Pyramidobacter_sp_C12_8	0.00393948	0.0203801	ND
2.3.1.9	healthy	Raoultella	Raoultella_ornithinolytica	0	0	ND
2.3.1.9	healthy	Raoultella	Raoultella_planticola	0	0	ND
2.3.1.9	healthy	Roseburia	Roseburia_faecis	1.71474	2.19493	ND
2.3.1.9	healthy	Roseburia	Roseburia_hominis	0.622386	0.993725	ND
2.3.1.9	healthy	Roseburia	Roseburia_intestinalis	0.840957	1.45078	ND
2.3.1.9	healthy	Roseburia	Roseburia_intestinalis_CAG_13	0.790668	1.51127	ND
2.3.1.9	healthy	Roseburia	Roseburia_inulinivorans	1.48076	1.76647	ND
2.3.1.9	healthy	Roseburia	Roseburia_inulinivorans_CAG_15	1.56934	1.91255	ND
2.3.1.9	healthy	Roseburia	Roseburia_sp_CAG_182	0.0119899	0.0799749	ND
2.3.1.9	healthy	Blautia	Ruminococcus_torques	1.4132	1.71112	ND
2.3.1.9	healthy	Sanguibacteroides	Sanguibacteroides_justesenii	0.00992694	0.0668728	ND
2.3.1.9	healthy	Staphylococcus	Staphylococcus_aureus	0.00486265	0.0350651	ND
2.3.1.9	healthy	Streptococcus	Streptococcus_anginosus_group	0	0	ND
2.3.1.9	healthy	Streptococcus	Streptococcus_cristatus	0	0	ND
2.3.1.9	healthy	Streptococcus	Streptococcus_infantis	0	0	ND
2.3.1.9	healthy	Streptococcus	Streptococcus_milleri	0	0	ND
2.3.1.9	healthy	Streptococcus	Streptococcus_mitis	0	0	ND
2.3.1.9	healthy	Streptococcus	Streptococcus_oralis	0	0	ND
2.3.1.9	healthy	Streptococcus	Streptococcus_sp_NLAE_zl_C503	0	0	ND
2.3.1.9	healthy	Streptococcus	Streptococcus_viridans	0	0	ND
2.3.1.9	healthy	unclassified	Unclassified	5.61803	3.22154	ND
2.3.3.10	compensated	Enterococcus	Enterococcus_faecalis	0.00728608	0.0504795	0.00028958
2.3.3.10	compensated	Enterococcus	Enterococcus_gallinarum	0	0	0.00028958
2.3.3.10	compensated	Lactobacillus	Lactobacillus_johnsonii	0	0	0.00028958
2.3.3.10	compensated	Lactobacillus	Lactobacillus_paragasseri	0.00715067	0.0495413	0.00028958
2.3.3.10	compensated	Lactobacillus	Lactobacillus_reuteri	0	0	0.00028958
2.3.3.10	compensated	Staphylococcus	Staphylococcus_aureus	0	0	0.00028958
2.3.3.10	compensated	Staphylococcus	Staphylococcus_sciuri	0	0	0.00028958
2.3.3.10	compensated	Streptococcus	Streptococcus_anginosus_group	0.0957425	0.216868	0.00028958
2.3.3.10	compensated	Streptococcus	Streptococcus_australis	0.0134547	0.0809902	0.00028958
2.3.3.10	compensated	Streptococcus	Streptococcus_cristatus	0.00394194	0.0273105	0.00028958
2.3.3.10	compensated	Streptococcus	Streptococcus_gordonii	0.0386438	0.133347	0.00028958
2.3.3.10	compensated	Streptococcus	Streptococcus_infantarius	0.0514153	0.264168	0.00028958
2.3.3.10	compensated	Streptococcus	Streptococcus_infantis	0.11236	0.630094	0.00028958
2.3.3.10	compensated	Streptococcus	Streptococcus_lutetiensis	0.022935	0.126777	0.00028958
2.3.3.10	compensated	Streptococcus	Streptococcus_macedonicus	0	0	0.00028958
2.3.3.10	compensated	Streptococcus	Streptococcus_milleri	0.00235023	0.0162829	0.00028958
2.3.3.10	compensated	Streptococcus	Streptococcus_mitis	0.0818248	0.384459	0.00028958
2.3.3.10	compensated	Streptococcus	Streptococcus_oralis	0.0983072	0.555529	0.00028958
2.3.3.10	compensated	Streptococcus	Streptococcus_parasanguinis	0.647137	1.14707	0.00028958
2.3.3.10	compensated	Streptococcus	Streptococcus_pasteurianus	0.0533469	0.369598	0.00028958
2.3.3.10	compensated	Streptococcus	Streptococcus_peroris	0	0	0.00028958
2.3.3.10	compensated	Streptococcus	Streptococcus_salivarius	0.00110723	0.00767111	0.00028958
2.3.3.10	compensated	Streptococcus	Streptococcus_sanguinis	0.00289179	0.0160299	0.00028958
2.3.3.10	compensated	Streptococcus	Streptococcus_sp_A12	0.00371535	0.0257407	0.00028958
2.3.3.10	compensated	Streptococcus	Streptococcus_sp_F0442	0.00514844	0.0356694	0.00028958
2.3.3.10	compensated	Streptococcus	Streptococcus_sp_HMSC034E03	0.00526213	0.0364571	0.00028958
2.3.3.10	compensated	Streptococcus	Streptococcus_sp_HPH0090	0.0561229	0.388831	0.00028958
2.3.3.10	compensated	Streptococcus	Streptococcus_sp_NLAE_zl_C503	0	0	0.00028958
2.3.3.10	compensated	Streptococcus	Streptococcus_sp_oral_taxon_058	0	0	0.00028958
2.3.3.10	compensated	Streptococcus	Streptococcus_viridans	0.0656707	0.24884	0.00028958
2.3.3.10	compensated	unclassified	Unclassified	0.103868	0.422922	0.00028958
2.3.3.10	decompensated	Enterococcus	Enterococcus_faecalis	0	0	0.0023428
2.3.3.10	decompensated	Enterococcus	Enterococcus_gallinarum	0	0	0.0023428
2.3.3.10	decompensated	Lactobacillus	Lactobacillus_johnsonii	0	0	0.0023428
2.3.3.10	decompensated	Lactobacillus	Lactobacillus_paragasseri	0.108672	0.545399	0.0023428
2.3.3.10	decompensated	Lactobacillus	Lactobacillus_reuteri	0.0231827	0.153777	0.0023428
2.3.3.10	decompensated	Staphylococcus	Staphylococcus_aureus	0	0	0.0023428
2.3.3.10	decompensated	Staphylococcus	Staphylococcus_sciuri	0	0	0.0023428
2.3.3.10	decompensated	Streptococcus	Streptococcus_anginosus_group	0.222354	0.555481	0.0023428
2.3.3.10	decompensated	Streptococcus	Streptococcus_australis	0.0156725	0.10396	0.0023428
2.3.3.10	decompensated	Streptococcus	Streptococcus_cristatus	0.0130092	0.0603523	0.0023428
2.3.3.10	decompensated	Streptococcus	Streptococcus_gordonii	0.0303559	0.105155	0.0023428
2.3.3.10	decompensated	Streptococcus	Streptococcus_infantarius	0	0	0.0023428
2.3.3.10	decompensated	Streptococcus	Streptococcus_infantis	0.00709873	0.0470876	0.0023428
2.3.3.10	decompensated	Streptococcus	Streptococcus_lutetiensis	0	0	0.0023428
2.3.3.10	decompensated	Streptococcus	Streptococcus_macedonicus	0	0	0.0023428
2.3.3.10	decompensated	Streptococcus	Streptococcus_milleri	0	0	0.0023428
2.3.3.10	decompensated	Streptococcus	Streptococcus_mitis	0.0609748	0.184245	0.0023428
2.3.3.10	decompensated	Streptococcus	Streptococcus_oralis	0.0588279	0.138912	0.0023428
2.3.3.10	decompensated	Streptococcus	Streptococcus_parasanguinis	0.631691	1.2843	0.0023428
2.3.3.10	decompensated	Streptococcus	Streptococcus_pasteurianus	0.0220085	0.145988	0.0023428
2.3.3.10	decompensated	Streptococcus	Streptococcus_peroris	0	0	0.0023428
2.3.3.10	decompensated	Streptococcus	Streptococcus_salivarius	0.000681818	0.00452267	0.0023428
2.3.3.10	decompensated	Streptococcus	Streptococcus_sanguinis	0.00542514	0.0235957	0.0023428
2.3.3.10	decompensated	Streptococcus	Streptococcus_sp_A12	0	0	0.0023428
2.3.3.10	decompensated	Streptococcus	Streptococcus_sp_F0442	0.0169377	0.0717212	0.0023428
2.3.3.10	decompensated	Streptococcus	Streptococcus_sp_HMSC034E03	0	0	0.0023428
2.3.3.10	decompensated	Streptococcus	Streptococcus_sp_HPH0090	0.00589911	0.0391303	0.0023428
2.3.3.10	decompensated	Streptococcus	Streptococcus_sp_NLAE_zl_C503	0.00162939	0.0108081	0.0023428
2.3.3.10	decompensated	Streptococcus	Streptococcus_sp_oral_taxon_058	0.00242691	0.0160983	0.0023428
2.3.3.10	decompensated	Streptococcus	Streptococcus_viridans	0	0	0.0023428
2.3.3.10	decompensated	unclassified	Unclassified	0.0548284	0.15386	0.0023428
2.3.3.10	healthy	Enterococcus	Enterococcus_faecalis	0	0	ND
2.3.3.10	healthy	Enterococcus	Enterococcus_gallinarum	0	0	ND
2.3.3.10	healthy	Lactobacillus	Lactobacillus_johnsonii	0	0	ND
2.3.3.10	healthy	Lactobacillus	Lactobacillus_paragasseri	0	0	ND
2.3.3.10	healthy	Lactobacillus	Lactobacillus_reuteri	0	0	ND
2.3.3.10	healthy	Staphylococcus	Staphylococcus_aureus	0.0142214	0.102552	ND
2.3.3.10	healthy	Staphylococcus	Staphylococcus_sciuri	0.00183398	0.013225	ND
2.3.3.10	healthy	Streptococcus	Streptococcus_anginosus_group	0	0	ND
2.3.3.10	healthy	Streptococcus	Streptococcus_australis	0.00423219	0.0305188	ND
2.3.3.10	healthy	Streptococcus	Streptococcus_cristatus	0	0	ND
2.3.3.10	healthy	Streptococcus	Streptococcus_gordonii	0	0	ND
2.3.3.10	healthy	Streptococcus	Streptococcus_infantarius	0	0	ND
2.3.3.10	healthy	Streptococcus	Streptococcus_infantis	0	0	ND
2.3.3.10	healthy	Streptococcus	Streptococcus_lutetiensis	0	0	ND
2.3.3.10	healthy	Streptococcus	Streptococcus_macedonicus	0	0	ND
2.3.3.10	healthy	Streptococcus	Streptococcus_milleri	0	0	ND
2.3.3.10	healthy	Streptococcus	Streptococcus_mitis	0	0	ND
2.3.3.10	healthy	Streptococcus	Streptococcus_oralis	0	0	ND
2.3.3.10	healthy	Streptococcus	Streptococcus_parasanguinis	0	0	ND
2.3.3.10	healthy	Streptococcus	Streptococcus_pasteurianus	0	0	ND
2.3.3.10	healthy	Streptococcus	Streptococcus_peroris	0	0	ND
2.3.3.10	healthy	Streptococcus	Streptococcus_salivarius	0	0	ND
2.3.3.10	healthy	Streptococcus	Streptococcus_sanguinis	0	0	ND
2.3.3.10	healthy	Streptococcus	Streptococcus_sp_A12	0.00302237	0.0217946	ND
2.3.3.10	healthy	Streptococcus	Streptococcus_sp_F0442	0	0	ND
2.3.3.10	healthy	Streptococcus	Streptococcus_sp_HMSC034E03	0	0	ND
2.3.3.10	healthy	Streptococcus	Streptococcus_sp_HPH0090	0	0	ND
2.3.3.10	healthy	Streptococcus	Streptococcus_sp_NLAE_zl_C503	0	0	ND
2.3.3.10	healthy	Streptococcus	Streptococcus_sp_oral_taxon_058	0	0	ND
2.3.3.10	healthy	Streptococcus	Streptococcus_viridans	0	0	ND
2.3.3.10	healthy	unclassified	Unclassified	0.00397004	0.0286284	ND
2.5.1.1	compensated	Bacteroides	Bacteroides_dorei	5.1715	11.0112	0.595886
2.5.1.1	compensated	Bacteroides	Bacteroides_sartorii	0	0	0.595886
2.5.1.1	compensated	Bacteroides	Bacteroides_vulgatus	10.4726	13.6445	0.595886
2.5.1.1	compensated	Bacteroides	Bacteroides_vulgatus_CAG_6	10.3464	13.0825	0.595886
2.5.1.1	compensated	Campylobacter	Campylobacter_concisus	0.0552084	0.188858	0.595886
2.5.1.1	compensated	Campylobacter	Campylobacter_showae	0	0	0.595886
2.5.1.1	compensated	Enterococcus	Enterococcus_faecalis	0.0168847	0.11698	0.595886
2.5.1.1	compensated	Enterococcus	Enterococcus_gallinarum	0	0	0.595886
2.5.1.1	compensated	Fusobacterium	Fusobacterium_hwasookii	0.00940719	0.0482477	0.595886
2.5.1.1	compensated	Fusobacterium	Fusobacterium_nucleatum	0.119716	0.611133	0.595886
2.5.1.1	compensated	Fusobacterium	Fusobacterium_periodonticum	0.0390181	0.165258	0.595886
2.5.1.1	compensated	Klebsiella	Klebsiella_pneumoniae	0.224607	1.03859	0.595886
2.5.1.1	compensated	Lactobacillus	Lactobacillus_reuteri	0	0	0.595886
2.5.1.1	compensated	Lactobacillus	Lactobacillus_salivarius	0.877147	2.3088	0.595886
2.5.1.1	compensated	Streptococcus	Streptococcus_anginosus_group	0.147205	0.36749	0.595886
2.5.1.1	compensated	Streptococcus	Streptococcus_cristatus	0.00316427	0.0219227	0.595886
2.5.1.1	compensated	Streptococcus	Streptococcus_parasanguinis	0.543821	0.886736	0.595886
2.5.1.1	compensated	Streptococcus	Streptococcus_sinensis	0	0	0.595886
2.5.1.1	compensated	Streptococcus	Streptococcus_sp_F0442	0.0154246	0.106865	0.595886
2.5.1.1	compensated	Streptococcus	Streptococcus_viridans	0.0326858	0.132237	0.595886
2.5.1.1	compensated	unclassified	Unclassified	0.106162	0.356532	0.595886
2.5.1.1	compensated	Veillonella	Veillonella_dispar	1.2465	2.55961	0.595886
2.5.1.1	compensated	Veillonella	Veillonella_parvula	1.3782	2.3083	0.595886
2.5.1.1	compensated	Weissella	Weissella_cibaria	0	0	0.595886
2.5.1.1	decompensated	Bacteroides	Bacteroides_dorei	4.69705	9.5387	0.176917
2.5.1.1	decompensated	Bacteroides	Bacteroides_sartorii	0	0	0.176917
2.5.1.1	decompensated	Bacteroides	Bacteroides_vulgatus	13.8733	10.511	0.176917
2.5.1.1	decompensated	Bacteroides	Bacteroides_vulgatus_CAG_6	14.0796	11.1363	0.176917
2.5.1.1	decompensated	Campylobacter	Campylobacter_concisus	0.240478	0.593854	0.176917
2.5.1.1	decompensated	Campylobacter	Campylobacter_showae	0.004863	0.0322575	0.176917
2.5.1.1	decompensated	Enterococcus	Enterococcus_faecalis	0	0	0.176917
2.5.1.1	decompensated	Enterococcus	Enterococcus_gallinarum	0	0	0.176917
2.5.1.1	decompensated	Fusobacterium	Fusobacterium_hwasookii	0.000859886	0.00570384	0.176917
2.5.1.1	decompensated	Fusobacterium	Fusobacterium_nucleatum	0.348208	1.38492	0.176917
2.5.1.1	decompensated	Fusobacterium	Fusobacterium_periodonticum	0.0271978	0.118112	0.176917
2.5.1.1	decompensated	Klebsiella	Klebsiella_pneumoniae	0.313472	1.22275	0.176917
2.5.1.1	decompensated	Lactobacillus	Lactobacillus_reuteri	0.0212687	0.141081	0.176917
2.5.1.1	decompensated	Lactobacillus	Lactobacillus_salivarius	1.43055	4.6013	0.176917
2.5.1.1	decompensated	Streptococcus	Streptococcus_anginosus_group	0.196307	0.484364	0.176917
2.5.1.1	decompensated	Streptococcus	Streptococcus_cristatus	0.0216165	0.0873806	0.176917
2.5.1.1	decompensated	Streptococcus	Streptococcus_parasanguinis	0.469578	0.920245	0.176917
2.5.1.1	decompensated	Streptococcus	Streptococcus_sinensis	0	0	0.176917
2.5.1.1	decompensated	Streptococcus	Streptococcus_sp_F0442	0.0458809	0.188956	0.176917
2.5.1.1	decompensated	Streptococcus	Streptococcus_viridans	0	0	0.176917
2.5.1.1	decompensated	unclassified	Unclassified	0.120381	0.326425	0.176917
2.5.1.1	decompensated	Veillonella	Veillonella_dispar	1.48479	2.61999	0.176917
2.5.1.1	decompensated	Veillonella	Veillonella_parvula	1.70296	3.26527	0.176917
2.5.1.1	decompensated	Weissella	Weissella_cibaria	0	0	0.176917
2.5.1.1	healthy	Bacteroides	Bacteroides_dorei	5.37512	9.1215	ND
2.5.1.1	healthy	Bacteroides	Bacteroides_sartorii	0.0178146	0.0983646	ND
2.5.1.1	healthy	Bacteroides	Bacteroides_vulgatus	8.96829	8.70282	ND
2.5.1.1	healthy	Bacteroides	Bacteroides_vulgatus_CAG_6	8.93161	8.3609	ND
2.5.1.1	healthy	Campylobacter	Campylobacter_concisus	0	0	ND
2.5.1.1	healthy	Campylobacter	Campylobacter_showae	0	0	ND
2.5.1.1	healthy	Enterococcus	Enterococcus_faecalis	0	0	ND
2.5.1.1	healthy	Enterococcus	Enterococcus_gallinarum	0	0	ND
2.5.1.1	healthy	Fusobacterium	Fusobacterium_hwasookii	0	0	ND
2.5.1.1	healthy	Fusobacterium	Fusobacterium_nucleatum	0	0	ND
2.5.1.1	healthy	Fusobacterium	Fusobacterium_periodonticum	0	0	ND
2.5.1.1	healthy	Klebsiella	Klebsiella_pneumoniae	0.0477112	0.201084	ND
2.5.1.1	healthy	Lactobacillus	Lactobacillus_reuteri	0	0	ND
2.5.1.1	healthy	Lactobacillus	Lactobacillus_salivarius	0.00890433	0.06421	ND
2.5.1.1	healthy	Streptococcus	Streptococcus_anginosus_group	0	0	ND
2.5.1.1	healthy	Streptococcus	Streptococcus_cristatus	0	0	ND
2.5.1.1	healthy	Streptococcus	Streptococcus_parasanguinis	0.00697485	0.0502963	ND
2.5.1.1	healthy	Streptococcus	Streptococcus_sinensis	0	0	ND
2.5.1.1	healthy	Streptococcus	Streptococcus_sp_F0442	0	0	ND
2.5.1.1	healthy	Streptococcus	Streptococcus_viridans	0	0	ND
2.5.1.1	healthy	unclassified	Unclassified	0.0044225	0.0258046	ND
2.5.1.1	healthy	Veillonella	Veillonella_dispar	0.00361902	0.0260971	ND
2.5.1.1	healthy	Veillonella	Veillonella_parvula	0.00716548	0.0366477	ND
2.5.1.1	healthy	Weissella	Weissella_cibaria	0	0	ND
2.5.1.10	compensated	Agathobaculum	Agathobaculum_butyriciproducens	0.0408045	0.127884	0.790609
2.5.1.10	compensated	Aggregatibacter	Aggregatibacter_aphrophilus	0.00192929	0.0133665	0.790609
2.5.1.10	compensated	Aggregatibacter	Aggregatibacter_segnis	0.00926365	0.0403461	0.790609
2.5.1.10	compensated	Aggregatibacter	Aggregatibacter_sp_oral_taxon_458	0.0020875	0.010216	0.790609
2.5.1.10	compensated	Anaerostipes	Anaerostipes_hadrus	0.134767	0.271415	0.790609
2.5.1.10	compensated	Anaerotruncus	Anaerotruncus_colihominis	0	0	0.790609
2.5.1.10	compensated	Bacteroides	Bacteroides_cellulosilyticus	0.626875	3.60168	0.790609
2.5.1.10	compensated	Bacteroides	Bacteroides_dorei	5.1715	11.0112	0.790609
2.5.1.10	compensated	Bacteroides	Bacteroides_faecis	0	0	0.790609
2.5.1.10	compensated	Bacteroides	Bacteroides_fragilis	1.28227	3.51309	0.790609
2.5.1.10	compensated	Bacteroides	Bacteroides_fragilis_CAG_47	1.90586	6.27644	0.790609
2.5.1.10	compensated	Bacteroides	Bacteroides_intestinalis	0.0381349	0.114932	0.790609
2.5.1.10	compensated	Bacteroides	Bacteroides_oleiciplenus	0	0	0.790609
2.5.1.10	compensated	Bacteroides	Bacteroides_sartorii	0	0	0.790609
2.5.1.10	compensated	Bacteroides	Bacteroides_stercoris	5.24059	9.06388	0.790609
2.5.1.10	compensated	Bacteroides	Bacteroides_thetaiotaomicron	2.55179	4.6994	0.790609
2.5.1.10	compensated	Bacteroides	Bacteroides_vulgatus	10.4726	13.6445	0.790609
2.5.1.10	compensated	Bacteroides	Bacteroides_vulgatus_CAG_6	10.3464	13.0825	0.790609
2.5.1.10	compensated	Bacteroides	Bacteroides_xylanisolvens	0.0279435	0.193599	0.790609
2.5.1.10	compensated	Blautia	Blautia_obeum	0.166903	0.393221	0.790609
2.5.1.10	compensated	Blautia	Blautia_wexlerae	0.205487	0.345161	0.790609
2.5.1.10	compensated	Campylobacter	Campylobacter_concisus	0.0552084	0.188858	0.790609
2.5.1.10	compensated	Campylobacter	Campylobacter_gracilis	0	0	0.790609
2.5.1.10	compensated	Campylobacter	Campylobacter_showae	0	0	0.790609
2.5.1.10	compensated	Citrobacter	Citrobacter_braakii	0.00445321	0.0215886	0.790609
2.5.1.10	compensated	Citrobacter	Citrobacter_europaeus	0	0	0.790609
2.5.1.10	compensated	Citrobacter	Citrobacter_freundii	0.00407758	0.0252885	0.790609
2.5.1.10	compensated	Citrobacter	Citrobacter_portucalensis	0.0123164	0.0571632	0.790609
2.5.1.10	compensated	Citrobacter	Citrobacter_werkmanii	0	0	0.790609
2.5.1.10	compensated	Citrobacter	Citrobacter_youngae	0.00679427	0.0349735	0.790609
2.5.1.10	compensated	Clostridioides	Clostridioides_difficile	0.0142236	0.0985443	0.790609
2.5.1.10	compensated	Lachnoclostridium	Clostridium_citroniae	0	0	0.790609
2.5.1.10	compensated	Clostridium	Clostridium_disporicum	0.0448663	0.225901	0.790609
2.5.1.10	compensated	Erysipelatoclostridium	Clostridium_innocuum	0.0304575	0.105913	0.790609
2.5.1.10	compensated	Lachnoclostridium	Clostridium_saccharolyticum	0	0	0.790609
2.5.1.10	compensated	Lachnoclostridium	Clostridium_symbiosum	0.064992	0.224661	0.790609
2.5.1.10	compensated	Clostridium	Clostridium_ventriculi	0.00282946	0.0196031	0.790609
2.5.1.10	compensated	Coprococcus	Coprococcus_catus	0	0	0.790609
2.5.1.10	compensated	Coprococcus	Coprococcus_eutactus	0.0109183	0.0756443	0.790609
2.5.1.10	compensated	Dorea	Dorea_longicatena	0.118561	0.341549	0.790609
2.5.1.10	compensated	Dorea	Dorea_longicatena_CAG_42	0.00226954	0.0157238	0.790609
2.5.1.10	compensated	Eisenbergiella	Eisenbergiella_tayi	0.0280464	0.137413	0.790609
2.5.1.10	compensated	Enterobacter	Enterobacter_cloacae_complex	0.00599596	0.0382373	0.790609
2.5.1.10	compensated	Enterococcus	Enterococcus_faecalis	0.0168847	0.11698	0.790609
2.5.1.10	compensated	Enterococcus	Enterococcus_faecium	0	0	0.790609
2.5.1.10	compensated	Enterococcus	Enterococcus_gallinarum	0	0	0.790609
2.5.1.10	compensated	Escherichia	Escherichia_coli	1.75369	3.12653	0.790609
2.5.1.10	compensated	Eubacterium	Eubacterium_eligens	0.021109	0.100448	0.790609
2.5.1.10	compensated	Eubacterium	Eubacterium_eligens_CAG_72	3.11535	5.43343	0.790609
2.5.1.10	compensated	Eubacterium	Eubacterium_hallii	0.0626079	0.16433	0.790609
2.5.1.10	compensated	Eubacterium	Eubacterium_hallii_CAG_12	0.0548881	0.161292	0.790609
2.5.1.10	compensated	Eubacterium	Eubacterium_ramulus	0	0	0.790609
2.5.1.10	compensated	Ruminococcaceae_unclassified	Eubacterium_siraeum	0.107738	0.578922	0.790609
2.5.1.10	compensated	Faecalibacterium	Faecalibacterium_prausnitzii	4.36776	7.29575	0.790609
2.5.1.10	compensated	Flavonifractor	Flavonifractor_plautii	0	0	0.790609
2.5.1.10	compensated	Fusicatenibacter	Fusicatenibacter_saccharivorans	0.401791	1.68324	0.790609
2.5.1.10	compensated	Fusobacterium	Fusobacterium_hwasookii	0.00940719	0.0482477	0.790609
2.5.1.10	compensated	Fusobacterium	Fusobacterium_mortiferum	1.05094	3.86975	0.790609
2.5.1.10	compensated	Fusobacterium	Fusobacterium_nucleatum	0.119716	0.611133	0.790609
2.5.1.10	compensated	Fusobacterium	Fusobacterium_periodonticum	0.0390181	0.165258	0.790609
2.5.1.10	compensated	Haemophilus	Haemophilus_haemolyticus	0	0	0.790609
2.5.1.10	compensated	Haemophilus	Haemophilus_influenzae	0	0	0.790609
2.5.1.10	compensated	Haemophilus	Haemophilus_parainfluenzae	1.5523	3.22967	0.790609
2.5.1.10	compensated	Haemophilus	Haemophilus_quentini	0	0	0.790609
2.5.1.10	compensated	Haemophilus	Haemophilus_sp_HMSC71H05	0.0682603	0.222892	0.790609
2.5.1.10	compensated	Hungatella	Hungatella_hathewayi	0.118619	0.415546	0.790609
2.5.1.10	compensated	Klebsiella	Klebsiella_aerogenes	0.0684136	0.465016	0.790609
2.5.1.10	compensated	Klebsiella	Klebsiella_michiganensis	0	0	0.790609
2.5.1.10	compensated	Klebsiella	Klebsiella_oxytoca	0	0	0.790609
2.5.1.10	compensated	Klebsiella	Klebsiella_pneumoniae	1.06568	4.22556	0.790609
2.5.1.10	compensated	Klebsiella	Klebsiella_quasipneumoniae	0.0173481	0.0710836	0.790609
2.5.1.10	compensated	Klebsiella	Klebsiella_variicola	0.059248	0.229126	0.790609
2.5.1.10	compensated	Lactobacillus	Lactobacillus_oris	0.00433365	0.0300244	0.790609
2.5.1.10	compensated	Lactobacillus	Lactobacillus_reuteri	0	0	0.790609
2.5.1.10	compensated	Lactobacillus	Lactobacillus_salivarius	0.877147	2.3088	0.790609
2.5.1.10	compensated	Morganella	Morganella_morganii	0.00674533	0.046733	0.790609
2.5.1.10	compensated	Neisseria	Neisseria_flavescens	0.0027466	0.019029	0.790609
2.5.1.10	compensated	Neisseria	Neisseria_mucosa	0.000768833	0.00532663	0.790609
2.5.1.10	compensated	Neisseria	Neisseria_sicca	0.000771792	0.00534713	0.790609
2.5.1.10	compensated	Peptostreptococcus	Peptostreptococcus_stomatis	0.0179394	0.0872147	0.790609
2.5.1.10	compensated	Prevotella	Prevotella_buccae	1.21503	5.13155	0.790609
2.5.1.10	compensated	Prevotella	Prevotella_salivae	0	0	0.790609
2.5.1.10	compensated	Pyramidobacter	Pyramidobacter_piscolens	0.00302475	0.0209561	0.790609
2.5.1.10	compensated	Pyramidobacter	Pyramidobacter_sp_C12_8	0.00249246	0.0172683	0.790609
2.5.1.10	compensated	Raoultella	Raoultella_ornithinolytica	0	0	0.790609
2.5.1.10	compensated	Raoultella	Raoultella_planticola	0	0	0.790609
2.5.1.10	compensated	Romboutsia	Romboutsia_ilealis	0.00746019	0.0516857	0.790609
2.5.1.10	compensated	Roseburia	Roseburia_faecis	0.924673	2.11565	0.790609
2.5.1.10	compensated	Roseburia	Roseburia_intestinalis	0.49219	1.99398	0.790609
2.5.1.10	compensated	Roseburia	Roseburia_intestinalis_CAG_13	0.412321	1.63063	0.790609
2.5.1.10	compensated	Blautia	Ruminococcus_torques	0.317761	0.71245	0.790609
2.5.1.10	compensated	Staphylococcus	Staphylococcus_capitis	0.00821948	0.0569462	0.790609
2.5.1.10	compensated	Streptococcus	Streptococcus_anginosus_group	0.147205	0.36749	0.790609
2.5.1.10	compensated	Streptococcus	Streptococcus_australis	0.0123537	0.0634187	0.790609
2.5.1.10	compensated	Streptococcus	Streptococcus_cristatus	0.00316427	0.0219227	0.790609
2.5.1.10	compensated	Streptococcus	Streptococcus_infantis	0.00137646	0.00953638	0.790609
2.5.1.10	compensated	Streptococcus	Streptococcus_parasanguinis	0.543821	0.886736	0.790609
2.5.1.10	compensated	Streptococcus	Streptococcus_sinensis	0	0	0.790609
2.5.1.10	compensated	Streptococcus	Streptococcus_sp_A12	0.00903852	0.0502399	0.790609
2.5.1.10	compensated	Streptococcus	Streptococcus_sp_F0442	0.0154246	0.106865	0.790609
2.5.1.10	compensated	Streptococcus	Streptococcus_sp_HMSC034E03	0.00275115	0.0190605	0.790609
2.5.1.10	compensated	Streptococcus	Streptococcus_viridans	0.0326858	0.132237	0.790609
2.5.1.10	compensated	Turicibacter	Turicibacter_sanguinis	0.0153169	0.0791561	0.790609
2.5.1.10	compensated	unclassified	Unclassified	2.86087	2.92745	0.790609
2.5.1.10	compensated	Veillonella	Veillonella_dispar	1.2465	2.55961	0.790609
2.5.1.10	compensated	Veillonella	Veillonella_parvula	1.3782	2.3083	0.790609
2.5.1.10	compensated	Weissella	Weissella_cibaria	0	0	0.790609
2.5.1.10	decompensated	Agathobaculum	Agathobaculum_butyriciproducens	0.0378873	0.11285	0.0420522
2.5.1.10	decompensated	Aggregatibacter	Aggregatibacter_aphrophilus	0	0	0.0420522
2.5.1.10	decompensated	Aggregatibacter	Aggregatibacter_segnis	0.0726761	0.482079	0.0420522
2.5.1.10	decompensated	Aggregatibacter	Aggregatibacter_sp_oral_taxon_458	0.0210109	0.13937	0.0420522
2.5.1.10	decompensated	Anaerostipes	Anaerostipes_hadrus	0.231996	0.694696	0.0420522
2.5.1.10	decompensated	Anaerotruncus	Anaerotruncus_colihominis	0	0	0.0420522
2.5.1.10	decompensated	Bacteroides	Bacteroides_cellulosilyticus	0.401102	1.75974	0.0420522
2.5.1.10	decompensated	Bacteroides	Bacteroides_dorei	4.69705	9.5387	0.0420522
2.5.1.10	decompensated	Bacteroides	Bacteroides_faecis	0	0	0.0420522
2.5.1.10	decompensated	Bacteroides	Bacteroides_fragilis	0.283463	0.632446	0.0420522
2.5.1.10	decompensated	Bacteroides	Bacteroides_fragilis_CAG_47	0.319615	0.673871	0.0420522
2.5.1.10	decompensated	Bacteroides	Bacteroides_intestinalis	0.160221	0.62889	0.0420522
2.5.1.10	decompensated	Bacteroides	Bacteroides_oleiciplenus	0	0	0.0420522
2.5.1.10	decompensated	Bacteroides	Bacteroides_sartorii	0	0	0.0420522
2.5.1.10	decompensated	Bacteroides	Bacteroides_stercoris	7.07269	11.9619	0.0420522
2.5.1.10	decompensated	Bacteroides	Bacteroides_thetaiotaomicron	4.13157	5.41695	0.0420522
2.5.1.10	decompensated	Bacteroides	Bacteroides_vulgatus	13.8733	10.511	0.0420522
2.5.1.10	decompensated	Bacteroides	Bacteroides_vulgatus_CAG_6	14.0796	11.1363	0.0420522
2.5.1.10	decompensated	Bacteroides	Bacteroides_xylanisolvens	0	0	0.0420522
2.5.1.10	decompensated	Blautia	Blautia_obeum	0.0628394	0.177466	0.0420522
2.5.1.10	decompensated	Blautia	Blautia_wexlerae	0.13163	0.27688	0.0420522
2.5.1.10	decompensated	Campylobacter	Campylobacter_concisus	0.240478	0.593854	0.0420522
2.5.1.10	decompensated	Campylobacter	Campylobacter_gracilis	0.00778207	0.0390085	0.0420522
2.5.1.10	decompensated	Campylobacter	Campylobacter_showae	0.004863	0.0322575	0.0420522
2.5.1.10	decompensated	Citrobacter	Citrobacter_braakii	0.00536968	0.0356184	0.0420522
2.5.1.10	decompensated	Citrobacter	Citrobacter_europaeus	0.0095108	0.0630875	0.0420522
2.5.1.10	decompensated	Citrobacter	Citrobacter_freundii	0.00524293	0.0243223	0.0420522
2.5.1.10	decompensated	Citrobacter	Citrobacter_portucalensis	0.0109268	0.0724803	0.0420522
2.5.1.10	decompensated	Citrobacter	Citrobacter_werkmanii	0.000918159	0.00609038	0.0420522
2.5.1.10	decompensated	Citrobacter	Citrobacter_youngae	0.0116943	0.0627306	0.0420522
2.5.1.10	decompensated	Clostridioides	Clostridioides_difficile	0.00336064	0.0222919	0.0420522
2.5.1.10	decompensated	Lachnoclostridium	Clostridium_citroniae	0.00817325	0.0542152	0.0420522
2.5.1.10	decompensated	Clostridium	Clostridium_disporicum	0.00608623	0.0403715	0.0420522
2.5.1.10	decompensated	Erysipelatoclostridium	Clostridium_innocuum	0.00260691	0.0172923	0.0420522
2.5.1.10	decompensated	Lachnoclostridium	Clostridium_saccharolyticum	0	0	0.0420522
2.5.1.10	decompensated	Lachnoclostridium	Clostridium_symbiosum	0.0154241	0.0734651	0.0420522
2.5.1.10	decompensated	Clostridium	Clostridium_ventriculi	0	0	0.0420522
2.5.1.10	decompensated	Coprococcus	Coprococcus_catus	0.006878	0.0319173	0.0420522
2.5.1.10	decompensated	Coprococcus	Coprococcus_eutactus	0.0632665	0.262488	0.0420522
2.5.1.10	decompensated	Dorea	Dorea_longicatena	0.0351842	0.123515	0.0420522
2.5.1.10	decompensated	Dorea	Dorea_longicatena_CAG_42	0.00481477	0.0319376	0.0420522
2.5.1.10	decompensated	Eisenbergiella	Eisenbergiella_tayi	0	0	0.0420522
2.5.1.10	decompensated	Enterobacter	Enterobacter_cloacae_complex	0.00549232	0.0364319	0.0420522
2.5.1.10	decompensated	Enterococcus	Enterococcus_faecalis	0	0	0.0420522
2.5.1.10	decompensated	Enterococcus	Enterococcus_faecium	0.00221134	0.0146684	0.0420522
2.5.1.10	decompensated	Enterococcus	Enterococcus_gallinarum	0	0	0.0420522
2.5.1.10	decompensated	Escherichia	Escherichia_coli	8.29293	18.9213	0.0420522
2.5.1.10	decompensated	Eubacterium	Eubacterium_eligens	0.249723	1.61668	0.0420522
2.5.1.10	decompensated	Eubacterium	Eubacterium_eligens_CAG_72	3.96038	7.34379	0.0420522
2.5.1.10	decompensated	Eubacterium	Eubacterium_hallii	0.0561433	0.19473	0.0420522
2.5.1.10	decompensated	Eubacterium	Eubacterium_hallii_CAG_12	0.00668239	0.0443259	0.0420522
2.5.1.10	decompensated	Eubacterium	Eubacterium_ramulus	0	0	0.0420522
2.5.1.10	decompensated	Ruminococcaceae_unclassified	Eubacterium_siraeum	0.00280014	0.018574	0.0420522
2.5.1.10	decompensated	Faecalibacterium	Faecalibacterium_prausnitzii	6.63228	6.97158	0.0420522
2.5.1.10	decompensated	Flavonifractor	Flavonifractor_plautii	0	0	0.0420522
2.5.1.10	decompensated	Fusicatenibacter	Fusicatenibacter_saccharivorans	0.134246	0.276667	0.0420522
2.5.1.10	decompensated	Fusobacterium	Fusobacterium_hwasookii	0.000859886	0.00570384	0.0420522
2.5.1.10	decompensated	Fusobacterium	Fusobacterium_mortiferum	1.11168	2.91151	0.0420522
2.5.1.10	decompensated	Fusobacterium	Fusobacterium_nucleatum	0.348208	1.38492	0.0420522
2.5.1.10	decompensated	Fusobacterium	Fusobacterium_periodonticum	0.0271978	0.118112	0.0420522
2.5.1.10	decompensated	Haemophilus	Haemophilus_haemolyticus	0.00278036	0.0184428	0.0420522
2.5.1.10	decompensated	Haemophilus	Haemophilus_influenzae	0.00111698	0.00740919	0.0420522
2.5.1.10	decompensated	Haemophilus	Haemophilus_parainfluenzae	1.04637	1.6217	0.0420522
2.5.1.10	decompensated	Haemophilus	Haemophilus_quentini	0.00220589	0.0146322	0.0420522
2.5.1.10	decompensated	Haemophilus	Haemophilus_sp_HMSC71H05	0.510462	1.62839	0.0420522
2.5.1.10	decompensated	Hungatella	Hungatella_hathewayi	0.065837	0.249253	0.0420522
2.5.1.10	decompensated	Klebsiella	Klebsiella_aerogenes	0	0	0.0420522
2.5.1.10	decompensated	Klebsiella	Klebsiella_michiganensis	0.0124332	0.0532302	0.0420522
2.5.1.10	decompensated	Klebsiella	Klebsiella_oxytoca	0.59458	2.30435	0.0420522
2.5.1.10	decompensated	Klebsiella	Klebsiella_pneumoniae	2.50338	6.29671	0.0420522
2.5.1.10	decompensated	Klebsiella	Klebsiella_quasipneumoniae	0.0208853	0.0637972	0.0420522
2.5.1.10	decompensated	Klebsiella	Klebsiella_variicola	0.135178	0.474073	0.0420522
2.5.1.10	decompensated	Lactobacillus	Lactobacillus_oris	0	0	0.0420522
2.5.1.10	decompensated	Lactobacillus	Lactobacillus_reuteri	0.0212687	0.141081	0.0420522
2.5.1.10	decompensated	Lactobacillus	Lactobacillus_salivarius	1.43055	4.6013	0.0420522
2.5.1.10	decompensated	Morganella	Morganella_morganii	0	0	0.0420522
2.5.1.10	decompensated	Neisseria	Neisseria_flavescens	0	0	0.0420522
2.5.1.10	decompensated	Neisseria	Neisseria_mucosa	0	0	0.0420522
2.5.1.10	decompensated	Neisseria	Neisseria_sicca	0	0	0.0420522
2.5.1.10	decompensated	Peptostreptococcus	Peptostreptococcus_stomatis	0	0	0.0420522
2.5.1.10	decompensated	Prevotella	Prevotella_buccae	0.458358	1.94019	0.0420522
2.5.1.10	decompensated	Prevotella	Prevotella_salivae	0	0	0.0420522
2.5.1.10	decompensated	Pyramidobacter	Pyramidobacter_piscolens	0	0	0.0420522
2.5.1.10	decompensated	Pyramidobacter	Pyramidobacter_sp_C12_8	0	0	0.0420522
2.5.1.10	decompensated	Raoultella	Raoultella_ornithinolytica	0.00715702	0.0474743	0.0420522
2.5.1.10	decompensated	Raoultella	Raoultella_planticola	0.000917023	0.00608284	0.0420522
2.5.1.10	decompensated	Romboutsia	Romboutsia_ilealis	0	0	0.0420522
2.5.1.10	decompensated	Roseburia	Roseburia_faecis	0.5489	2.15969	0.0420522
2.5.1.10	decompensated	Roseburia	Roseburia_intestinalis	0.0794341	0.222994	0.0420522
2.5.1.10	decompensated	Roseburia	Roseburia_intestinalis_CAG_13	0.0781899	0.208178	0.0420522
2.5.1.10	decompensated	Blautia	Ruminococcus_torques	0.359802	0.784949	0.0420522
2.5.1.10	decompensated	Staphylococcus	Staphylococcus_capitis	0	0	0.0420522
2.5.1.10	decompensated	Streptococcus	Streptococcus_anginosus_group	0.196307	0.484364	0.0420522
2.5.1.10	decompensated	Streptococcus	Streptococcus_australis	0.0197618	0.0994928	0.0420522
2.5.1.10	decompensated	Streptococcus	Streptococcus_cristatus	0.0216165	0.0873806	0.0420522
2.5.1.10	decompensated	Streptococcus	Streptococcus_infantis	0	0	0.0420522
2.5.1.10	decompensated	Streptococcus	Streptococcus_parasanguinis	0.469578	0.920245	0.0420522
2.5.1.10	decompensated	Streptococcus	Streptococcus_sinensis	0	0	0.0420522
2.5.1.10	decompensated	Streptococcus	Streptococcus_sp_A12	0	0	0.0420522
2.5.1.10	decompensated	Streptococcus	Streptococcus_sp_F0442	0.0458809	0.188956	0.0420522
2.5.1.10	decompensated	Streptococcus	Streptococcus_sp_HMSC034E03	0	0	0.0420522
2.5.1.10	decompensated	Streptococcus	Streptococcus_viridans	0	0	0.0420522
2.5.1.10	decompensated	Turicibacter	Turicibacter_sanguinis	0	0	0.0420522
2.5.1.10	decompensated	unclassified	Unclassified	3.28981	2.80333	0.0420522
2.5.1.10	decompensated	Veillonella	Veillonella_dispar	1.48479	2.61999	0.0420522
2.5.1.10	decompensated	Veillonella	Veillonella_parvula	1.70296	3.26527	0.0420522
2.5.1.10	decompensated	Weissella	Weissella_cibaria	0	0	0.0420522
2.5.1.10	healthy	Agathobaculum	Agathobaculum_butyriciproducens	0.0210196	0.109527	ND
2.5.1.10	healthy	Aggregatibacter	Aggregatibacter_aphrophilus	0	0	ND
2.5.1.10	healthy	Aggregatibacter	Aggregatibacter_segnis	0	0	ND
2.5.1.10	healthy	Aggregatibacter	Aggregatibacter_sp_oral_taxon_458	0	0	ND
2.5.1.10	healthy	Anaerostipes	Anaerostipes_hadrus	0.281645	0.645709	ND
2.5.1.10	healthy	Anaerotruncus	Anaerotruncus_colihominis	0	0	ND
2.5.1.10	healthy	Bacteroides	Bacteroides_cellulosilyticus	0.545027	0.7826	ND
2.5.1.10	healthy	Bacteroides	Bacteroides_dorei	5.37512	9.1215	ND
2.5.1.10	healthy	Bacteroides	Bacteroides_faecis	0.0631933	0.455693	ND
2.5.1.10	healthy	Bacteroides	Bacteroides_fragilis	0.446714	1.14819	ND
2.5.1.10	healthy	Bacteroides	Bacteroides_fragilis_CAG_47	0.557874	1.18008	ND
2.5.1.10	healthy	Bacteroides	Bacteroides_intestinalis	0.199287	0.398486	ND
2.5.1.10	healthy	Bacteroides	Bacteroides_oleiciplenus	0.00170833	0.0123189	ND
2.5.1.10	healthy	Bacteroides	Bacteroides_sartorii	0.0178146	0.0983646	ND
2.5.1.10	healthy	Bacteroides	Bacteroides_stercoris	3.8405	6.69091	ND
2.5.1.10	healthy	Bacteroides	Bacteroides_thetaiotaomicron	1.3536	1.8135	ND
2.5.1.10	healthy	Bacteroides	Bacteroides_vulgatus	8.96829	8.70282	ND
2.5.1.10	healthy	Bacteroides	Bacteroides_vulgatus_CAG_6	8.93161	8.3609	ND
2.5.1.10	healthy	Bacteroides	Bacteroides_xylanisolvens	0	0	ND
2.5.1.10	healthy	Blautia	Blautia_obeum	0.283521	0.400414	ND
2.5.1.10	healthy	Blautia	Blautia_wexlerae	0.228354	0.282823	ND
2.5.1.10	healthy	Campylobacter	Campylobacter_concisus	0	0	ND
2.5.1.10	healthy	Campylobacter	Campylobacter_gracilis	0	0	ND
2.5.1.10	healthy	Campylobacter	Campylobacter_showae	0	0	ND
2.5.1.10	healthy	Citrobacter	Citrobacter_braakii	0.0035604	0.0256744	ND
2.5.1.10	healthy	Citrobacter	Citrobacter_europaeus	0	0	ND
2.5.1.10	healthy	Citrobacter	Citrobacter_freundii	0	0	ND
2.5.1.10	healthy	Citrobacter	Citrobacter_portucalensis	0.00355937	0.0256669	ND
2.5.1.10	healthy	Citrobacter	Citrobacter_werkmanii	0	0	ND
2.5.1.10	healthy	Citrobacter	Citrobacter_youngae	0.00231583	0.0131764	ND
2.5.1.10	healthy	Clostridioides	Clostridioides_difficile	0	0	ND
2.5.1.10	healthy	Lachnoclostridium	Clostridium_citroniae	0	0	ND
2.5.1.10	healthy	Clostridium	Clostridium_disporicum	0.00294881	0.0212642	ND
2.5.1.10	healthy	Erysipelatoclostridium	Clostridium_innocuum	0	0	ND
2.5.1.10	healthy	Lachnoclostridium	Clostridium_saccharolyticum	0	0	ND
2.5.1.10	healthy	Lachnoclostridium	Clostridium_symbiosum	0	0	ND
2.5.1.10	healthy	Clostridium	Clostridium_ventriculi	0	0	ND
2.5.1.10	healthy	Coprococcus	Coprococcus_catus	0	0	ND
2.5.1.10	healthy	Coprococcus	Coprococcus_eutactus	0.281518	1.30051	ND
2.5.1.10	healthy	Dorea	Dorea_longicatena	0.130559	0.20054	ND
2.5.1.10	healthy	Dorea	Dorea_longicatena_CAG_42	0.001374	0.00990805	ND
2.5.1.10	healthy	Eisenbergiella	Eisenbergiella_tayi	0	0	ND
2.5.1.10	healthy	Enterobacter	Enterobacter_cloacae_complex	0.000598404	0.00431515	ND
2.5.1.10	healthy	Enterococcus	Enterococcus_faecalis	0	0	ND
2.5.1.10	healthy	Enterococcus	Enterococcus_faecium	0.000721731	0.00520447	ND
2.5.1.10	healthy	Enterococcus	Enterococcus_gallinarum	0	0	ND
2.5.1.10	healthy	Escherichia	Escherichia_coli	1.80321	4.80432	ND
2.5.1.10	healthy	Eubacterium	Eubacterium_eligens	0.0902568	0.485733	ND
2.5.1.10	healthy	Eubacterium	Eubacterium_eligens_CAG_72	5.147	5.99669	ND
2.5.1.10	healthy	Eubacterium	Eubacterium_hallii	0.120138	0.193453	ND
2.5.1.10	healthy	Eubacterium	Eubacterium_hallii_CAG_12	0.104668	0.162623	ND
2.5.1.10	healthy	Eubacterium	Eubacterium_ramulus	0.00518417	0.0373836	ND
2.5.1.10	healthy	Ruminococcaceae_unclassified	Eubacterium_siraeum	0.372984	0.93658	ND
2.5.1.10	healthy	Faecalibacterium	Faecalibacterium_prausnitzii	4.1758	4.00972	ND
2.5.1.10	healthy	Flavonifractor	Flavonifractor_plautii	0.0205979	0.148533	ND
2.5.1.10	healthy	Fusicatenibacter	Fusicatenibacter_saccharivorans	0.411756	0.591351	ND
2.5.1.10	healthy	Fusobacterium	Fusobacterium_hwasookii	0	0	ND
2.5.1.10	healthy	Fusobacterium	Fusobacterium_mortiferum	0.322201	1.17991	ND
2.5.1.10	healthy	Fusobacterium	Fusobacterium_nucleatum	0	0	ND
2.5.1.10	healthy	Fusobacterium	Fusobacterium_periodonticum	0	0	ND
2.5.1.10	healthy	Haemophilus	Haemophilus_haemolyticus	0	0	ND
2.5.1.10	healthy	Haemophilus	Haemophilus_influenzae	0	0	ND
2.5.1.10	healthy	Haemophilus	Haemophilus_parainfluenzae	0.0441603	0.239369	ND
2.5.1.10	healthy	Haemophilus	Haemophilus_quentini	0	0	ND
2.5.1.10	healthy	Haemophilus	Haemophilus_sp_HMSC71H05	0	0	ND
2.5.1.10	healthy	Hungatella	Hungatella_hathewayi	0	0	ND
2.5.1.10	healthy	Klebsiella	Klebsiella_aerogenes	0	0	ND
2.5.1.10	healthy	Klebsiella	Klebsiella_michiganensis	0.0056734	0.0409115	ND
2.5.1.10	healthy	Klebsiella	Klebsiella_oxytoca	0	0	ND
2.5.1.10	healthy	Klebsiella	Klebsiella_pneumoniae	0.400386	1.14912	ND
2.5.1.10	healthy	Klebsiella	Klebsiella_quasipneumoniae	0.0140041	0.0459277	ND
2.5.1.10	healthy	Klebsiella	Klebsiella_variicola	0.0426202	0.149035	ND
2.5.1.10	healthy	Lactobacillus	Lactobacillus_oris	0	0	ND
2.5.1.10	healthy	Lactobacillus	Lactobacillus_reuteri	0	0	ND
2.5.1.10	healthy	Lactobacillus	Lactobacillus_salivarius	0.00890433	0.06421	ND
2.5.1.10	healthy	Morganella	Morganella_morganii	0	0	ND
2.5.1.10	healthy	Neisseria	Neisseria_flavescens	0	0	ND
2.5.1.10	healthy	Neisseria	Neisseria_mucosa	0	0	ND
2.5.1.10	healthy	Neisseria	Neisseria_sicca	0	0	ND
2.5.1.10	healthy	Peptostreptococcus	Peptostreptococcus_stomatis	0	0	ND
2.5.1.10	healthy	Prevotella	Prevotella_buccae	0	0	ND
2.5.1.10	healthy	Prevotella	Prevotella_salivae	0	0	ND
2.5.1.10	healthy	Pyramidobacter	Pyramidobacter_piscolens	0.00811546	0.0585214	ND
2.5.1.10	healthy	Pyramidobacter	Pyramidobacter_sp_C12_8	0.00896688	0.0646611	ND
2.5.1.10	healthy	Raoultella	Raoultella_ornithinolytica	0	0	ND
2.5.1.10	healthy	Raoultella	Raoultella_planticola	0	0	ND
2.5.1.10	healthy	Romboutsia	Romboutsia_ilealis	0.13714	0.518422	ND
2.5.1.10	healthy	Roseburia	Roseburia_faecis	0.988607	1.55801	ND
2.5.1.10	healthy	Roseburia	Roseburia_intestinalis	0.530322	1.01812	ND
2.5.1.10	healthy	Roseburia	Roseburia_intestinalis_CAG_13	0.525852	1.06007	ND
2.5.1.10	healthy	Blautia	Ruminococcus_torques	0.304191	0.413587	ND
2.5.1.10	healthy	Staphylococcus	Staphylococcus_capitis	0	0	ND
2.5.1.10	healthy	Streptococcus	Streptococcus_anginosus_group	0	0	ND
2.5.1.10	healthy	Streptococcus	Streptococcus_australis	0.00330792	0.0238538	ND
2.5.1.10	healthy	Streptococcus	Streptococcus_cristatus	0	0	ND
2.5.1.10	healthy	Streptococcus	Streptococcus_infantis	0	0	ND
2.5.1.10	healthy	Streptococcus	Streptococcus_parasanguinis	0.00697485	0.0502963	ND
2.5.1.10	healthy	Streptococcus	Streptococcus_sinensis	0	0	ND
2.5.1.10	healthy	Streptococcus	Streptococcus_sp_A12	0.00165187	0.0119118	ND
2.5.1.10	healthy	Streptococcus	Streptococcus_sp_F0442	0	0	ND
2.5.1.10	healthy	Streptococcus	Streptococcus_sp_HMSC034E03	0	0	ND
2.5.1.10	healthy	Streptococcus	Streptococcus_viridans	0	0	ND
2.5.1.10	healthy	Turicibacter	Turicibacter_sanguinis	0	0	ND
2.5.1.10	healthy	unclassified	Unclassified	4.05495	2.66316	ND
2.5.1.10	healthy	Veillonella	Veillonella_dispar	0.00361902	0.0260971	ND
2.5.1.10	healthy	Veillonella	Veillonella_parvula	0.00716548	0.0366477	ND
2.5.1.10	healthy	Weissella	Weissella_cibaria	0	0	ND
2.5.1.29	compensated	Bacteroides	Bacteroides_dorei	5.1715	11.0112	0.842829
2.5.1.29	compensated	Bacteroides	Bacteroides_sartorii	0	0	0.842829
2.5.1.29	compensated	Bacteroides	Bacteroides_vulgatus	10.4726	13.6445	0.842829
2.5.1.29	compensated	Bacteroides	Bacteroides_vulgatus_CAG_6	10.3464	13.0825	0.842829
2.5.1.29	compensated	Campylobacter	Campylobacter_concisus	0.0552084	0.188858	0.842829
2.5.1.29	compensated	Campylobacter	Campylobacter_showae	0	0	0.842829
2.5.1.29	compensated	Enterococcus	Enterococcus_gallinarum	0	0	0.842829
2.5.1.29	compensated	Eubacterium	Eubacterium_hallii	0.0321572	0.129128	0.842829
2.5.1.29	compensated	Faecalibacterium	Faecalibacterium_prausnitzii	4.09	7.28281	0.842829
2.5.1.29	compensated	Fusobacterium	Fusobacterium_hwasookii	0.00940719	0.0482477	0.842829
2.5.1.29	compensated	Fusobacterium	Fusobacterium_nucleatum	0.119716	0.611133	0.842829
2.5.1.29	compensated	Fusobacterium	Fusobacterium_periodonticum	0.0390181	0.165258	0.842829
2.5.1.29	compensated	Klebsiella	Klebsiella_pneumoniae	0.224607	1.03859	0.842829
2.5.1.29	compensated	Lactobacillus	Lactobacillus_reuteri	0	0	0.842829
2.5.1.29	compensated	Lactobacillus	Lactobacillus_salivarius	0.877147	2.3088	0.842829
2.5.1.29	compensated	Romboutsia	Romboutsia_ilealis	0.00746019	0.0516857	0.842829
2.5.1.29	compensated	Ruminococcus	Ruminococcus_bicirculans	0.440025	1.17535	0.842829
2.5.1.29	compensated	Streptococcus	Streptococcus_anginosus_group	0.147205	0.36749	0.842829
2.5.1.29	compensated	Streptococcus	Streptococcus_cristatus	0.00316427	0.0219227	0.842829
2.5.1.29	compensated	Streptococcus	Streptococcus_parasanguinis	0.543821	0.886736	0.842829
2.5.1.29	compensated	Streptococcus	Streptococcus_sinensis	0	0	0.842829
2.5.1.29	compensated	Streptococcus	Streptococcus_sp_F0442	0.0154246	0.106865	0.842829
2.5.1.29	compensated	Streptococcus	Streptococcus_viridans	0.0326858	0.132237	0.842829
2.5.1.29	compensated	unclassified	Unclassified	0.164325	0.417968	0.842829
2.5.1.29	compensated	Veillonella	Veillonella_dispar	1.2465	2.55961	0.842829
2.5.1.29	compensated	Veillonella	Veillonella_parvula	1.3782	2.3083	0.842829
2.5.1.29	compensated	Weissella	Weissella_cibaria	0	0	0.842829
2.5.1.29	decompensated	Bacteroides	Bacteroides_dorei	4.69705	9.5387	0.247576
2.5.1.29	decompensated	Bacteroides	Bacteroides_sartorii	0	0	0.247576
2.5.1.29	decompensated	Bacteroides	Bacteroides_vulgatus	13.8733	10.511	0.247576
2.5.1.29	decompensated	Bacteroides	Bacteroides_vulgatus_CAG_6	14.0796	11.1363	0.247576
2.5.1.29	decompensated	Campylobacter	Campylobacter_concisus	0.240478	0.593854	0.247576
2.5.1.29	decompensated	Campylobacter	Campylobacter_showae	0.004863	0.0322575	0.247576
2.5.1.29	decompensated	Enterococcus	Enterococcus_gallinarum	0	0	0.247576
2.5.1.29	decompensated	Eubacterium	Eubacterium_hallii	0.0491322	0.19095	0.247576
2.5.1.29	decompensated	Faecalibacterium	Faecalibacterium_prausnitzii	6.31551	6.9783	0.247576
2.5.1.29	decompensated	Fusobacterium	Fusobacterium_hwasookii	0.000859886	0.00570384	0.247576
2.5.1.29	decompensated	Fusobacterium	Fusobacterium_nucleatum	0.348208	1.38492	0.247576
2.5.1.29	decompensated	Fusobacterium	Fusobacterium_periodonticum	0.0271978	0.118112	0.247576
2.5.1.29	decompensated	Klebsiella	Klebsiella_pneumoniae	0.313472	1.22275	0.247576
2.5.1.29	decompensated	Lactobacillus	Lactobacillus_reuteri	0.0212687	0.141081	0.247576
2.5.1.29	decompensated	Lactobacillus	Lactobacillus_salivarius	1.43055	4.6013	0.247576
2.5.1.29	decompensated	Romboutsia	Romboutsia_ilealis	0	0	0.247576
2.5.1.29	decompensated	Ruminococcus	Ruminococcus_bicirculans	0.136897	0.435215	0.247576
2.5.1.29	decompensated	Streptococcus	Streptococcus_anginosus_group	0.196307	0.484364	0.247576
2.5.1.29	decompensated	Streptococcus	Streptococcus_cristatus	0.0216165	0.0873806	0.247576
2.5.1.29	decompensated	Streptococcus	Streptococcus_parasanguinis	0.469578	0.920245	0.247576
2.5.1.29	decompensated	Streptococcus	Streptococcus_sinensis	0	0	0.247576
2.5.1.29	decompensated	Streptococcus	Streptococcus_sp_F0442	0.0458809	0.188956	0.247576
2.5.1.29	decompensated	Streptococcus	Streptococcus_viridans	0	0	0.247576
2.5.1.29	decompensated	unclassified	Unclassified	0.151489	0.332881	0.247576
2.5.1.29	decompensated	Veillonella	Veillonella_dispar	1.48479	2.61999	0.247576
2.5.1.29	decompensated	Veillonella	Veillonella_parvula	1.70296	3.26527	0.247576
2.5.1.29	decompensated	Weissella	Weissella_cibaria	0	0	0.247576
2.5.1.29	healthy	Bacteroides	Bacteroides_dorei	5.37512	9.1215	ND
2.5.1.29	healthy	Bacteroides	Bacteroides_sartorii	0.0178146	0.0983646	ND
2.5.1.29	healthy	Bacteroides	Bacteroides_vulgatus	8.96829	8.70282	ND
2.5.1.29	healthy	Bacteroides	Bacteroides_vulgatus_CAG_6	8.93161	8.3609	ND
2.5.1.29	healthy	Campylobacter	Campylobacter_concisus	0	0	ND
2.5.1.29	healthy	Campylobacter	Campylobacter_showae	0	0	ND
2.5.1.29	healthy	Enterococcus	Enterococcus_gallinarum	0	0	ND
2.5.1.29	healthy	Eubacterium	Eubacterium_hallii	0.0345196	0.132725	ND
2.5.1.29	healthy	Faecalibacterium	Faecalibacterium_prausnitzii	3.70839	3.99148	ND
2.5.1.29	healthy	Fusobacterium	Fusobacterium_hwasookii	0	0	ND
2.5.1.29	healthy	Fusobacterium	Fusobacterium_nucleatum	0	0	ND
2.5.1.29	healthy	Fusobacterium	Fusobacterium_periodonticum	0	0	ND
2.5.1.29	healthy	Klebsiella	Klebsiella_pneumoniae	0.0477112	0.201084	ND
2.5.1.29	healthy	Lactobacillus	Lactobacillus_reuteri	0	0	ND
2.5.1.29	healthy	Lactobacillus	Lactobacillus_salivarius	0.00890433	0.06421	ND
2.5.1.29	healthy	Romboutsia	Romboutsia_ilealis	0.13714	0.518422	ND
2.5.1.29	healthy	Ruminococcus	Ruminococcus_bicirculans	0.786689	1.61851	ND
2.5.1.29	healthy	Streptococcus	Streptococcus_anginosus_group	0	0	ND
2.5.1.29	healthy	Streptococcus	Streptococcus_cristatus	0	0	ND
2.5.1.29	healthy	Streptococcus	Streptococcus_parasanguinis	0.00697485	0.0502963	ND
2.5.1.29	healthy	Streptococcus	Streptococcus_sinensis	0	0	ND
2.5.1.29	healthy	Streptococcus	Streptococcus_sp_F0442	0	0	ND
2.5.1.29	healthy	Streptococcus	Streptococcus_viridans	0	0	ND
2.5.1.29	healthy	unclassified	Unclassified	0.141312	0.436965	ND
2.5.1.29	healthy	Veillonella	Veillonella_dispar	0.00361902	0.0260971	ND
2.5.1.29	healthy	Veillonella	Veillonella_parvula	0.00716548	0.0366477	ND
2.5.1.29	healthy	Weissella	Weissella_cibaria	0	0	ND
2.5.1.30	compensated	Actinomyces	Actinomyces_sp_HPA0247	0.00771394	0.0534437	0.283315
2.5.1.30	compensated	Actinomyces	Actinomyces_sp_oral_taxon_180	0	0	0.283315
2.5.1.30	compensated	Clostridium	Clostridium_baratii	0	0	0.283315
2.5.1.30	compensated	Clostridium	Clostridium_perfringens	0.0800884	0.326089	0.283315
2.5.1.30	compensated	Coprococcus	Coprococcus_eutactus	0.0047205	0.0327046	0.283315
2.5.1.30	compensated	Enterococcus	Enterococcus_faecalis	0.0310612	0.215198	0.283315
2.5.1.30	compensated	Enterococcus	Enterococcus_gallinarum	0	0	0.283315
2.5.1.30	compensated	Ruminococcaceae_unclassified	Eubacterium_siraeum	0.0413115	0.195515	0.283315
2.5.1.30	compensated	Flavonifractor	Flavonifractor_plautii	0.425089	0.904276	0.283315
2.5.1.30	compensated	Fusobacterium	Fusobacterium_nucleatum	0.0744882	0.402211	0.283315
2.5.1.30	compensated	Intestinimonas	Intestinimonas_butyriciproducens	0.0154307	0.0667977	0.283315
2.5.1.30	compensated	Lactobacillus	Lactobacillus_crispatus	0	0	0.283315
2.5.1.30	compensated	Lactobacillus	Lactobacillus_fermentum	0.286449	1.08256	0.283315
2.5.1.30	compensated	Lactobacillus	Lactobacillus_johnsonii	0	0	0.283315
2.5.1.30	compensated	Lactobacillus	Lactobacillus_oris	0	0	0.283315
2.5.1.30	compensated	Lactobacillus	Lactobacillus_reuteri	0	0	0.283315
2.5.1.30	compensated	Lactobacillus	Lactobacillus_salivarius	1.01967	2.85378	0.283315
2.5.1.30	compensated	Lactococcus	Lactococcus_lactis	0.00330308	0.0228844	0.283315
2.5.1.30	compensated	Mitsuokella	Mitsuokella_multacida	0.0125515	0.0869595	0.283315
2.5.1.30	compensated	Parvimonas	Parvimonas_micra	0.0171003	0.118474	0.283315
2.5.1.30	compensated	Parvimonas	Parvimonas_sp_oral_taxon_393	0.00605733	0.0419664	0.283315
2.5.1.30	compensated	Prevotella	Prevotella_intermedia	0	0	0.283315
2.5.1.30	compensated	Prevotella	Prevotella_nigrescens	0	0	0.283315
2.5.1.30	compensated	Streptococcus	Streptococcus_infantis	0	0	0.283315
2.5.1.30	compensated	Streptococcus	Streptococcus_oralis	0.00183058	0.0126827	0.283315
2.5.1.30	compensated	Streptococcus	Streptococcus_salivarius	0.086886	0.422142	0.283315
2.5.1.30	compensated	Turicibacter	Turicibacter_sanguinis	0.0208569	0.107388	0.283315
2.5.1.30	compensated	unclassified	Unclassified	1.31386	2.54074	0.283315
2.5.1.30	compensated	Weissella	Weissella_confusa	0.0110342	0.0559016	0.283315
2.5.1.30	decompensated	Actinomyces	Actinomyces_sp_HPA0247	0	0	0.713692
2.5.1.30	decompensated	Actinomyces	Actinomyces_sp_oral_taxon_180	0	0	0.713692
2.5.1.30	decompensated	Clostridium	Clostridium_baratii	0.0177962	0.118047	0.713692
2.5.1.30	decompensated	Clostridium	Clostridium_perfringens	0	0	0.713692
2.5.1.30	decompensated	Coprococcus	Coprococcus_eutactus	0.0545045	0.259945	0.713692
2.5.1.30	decompensated	Enterococcus	Enterococcus_faecalis	0.00394134	0.0261439	0.713692
2.5.1.30	decompensated	Enterococcus	Enterococcus_gallinarum	0	0	0.713692
2.5.1.30	decompensated	Ruminococcaceae_unclassified	Eubacterium_siraeum	0	0	0.713692
2.5.1.30	decompensated	Flavonifractor	Flavonifractor_plautii	0.164172	0.298796	0.713692
2.5.1.30	decompensated	Fusobacterium	Fusobacterium_nucleatum	0.189147	0.772954	0.713692
2.5.1.30	decompensated	Intestinimonas	Intestinimonas_butyriciproducens	0.0116258	0.0771168	0.713692
2.5.1.30	decompensated	Lactobacillus	Lactobacillus_crispatus	0.0047588	0.0315663	0.713692
2.5.1.30	decompensated	Lactobacillus	Lactobacillus_fermentum	0.0444621	0.249228	0.713692
2.5.1.30	decompensated	Lactobacillus	Lactobacillus_johnsonii	0	0	0.713692
2.5.1.30	decompensated	Lactobacillus	Lactobacillus_oris	0.0139162	0.07327	0.713692
2.5.1.30	decompensated	Lactobacillus	Lactobacillus_reuteri	0.0557907	0.370074	0.713692
2.5.1.30	decompensated	Lactobacillus	Lactobacillus_salivarius	1.73294	6.51127	0.713692
2.5.1.30	decompensated	Lactococcus	Lactococcus_lactis	0	0	0.713692
2.5.1.30	decompensated	Mitsuokella	Mitsuokella_multacida	0	0	0.713692
2.5.1.30	decompensated	Parvimonas	Parvimonas_micra	0	0	0.713692
2.5.1.30	decompensated	Parvimonas	Parvimonas_sp_oral_taxon_393	0	0	0.713692
2.5.1.30	decompensated	Prevotella	Prevotella_intermedia	0.138027	0.634969	0.713692
2.5.1.30	decompensated	Prevotella	Prevotella_nigrescens	0.0038462	0.0255128	0.713692
2.5.1.30	decompensated	Streptococcus	Streptococcus_infantis	0	0	0.713692
2.5.1.30	decompensated	Streptococcus	Streptococcus_oralis	0	0	0.713692
2.5.1.30	decompensated	Streptococcus	Streptococcus_salivarius	0	0	0.713692
2.5.1.30	decompensated	Turicibacter	Turicibacter_sanguinis	0.00493273	0.03272	0.713692
2.5.1.30	decompensated	unclassified	Unclassified	1.9379	3.83129	0.713692
2.5.1.30	decompensated	Weissella	Weissella_confusa	0	0	0.713692
2.5.1.30	healthy	Actinomyces	Actinomyces_sp_HPA0247	0	0	ND
2.5.1.30	healthy	Actinomyces	Actinomyces_sp_oral_taxon_180	0	0	ND
2.5.1.30	healthy	Clostridium	Clostridium_baratii	0	0	ND
2.5.1.30	healthy	Clostridium	Clostridium_perfringens	0	0	ND
2.5.1.30	healthy	Coprococcus	Coprococcus_eutactus	0.376546	1.65192	ND
2.5.1.30	healthy	Enterococcus	Enterococcus_faecalis	0	0	ND
2.5.1.30	healthy	Enterococcus	Enterococcus_gallinarum	0	0	ND
2.5.1.30	healthy	Ruminococcaceae_unclassified	Eubacterium_siraeum	0.314114	0.819798	ND
2.5.1.30	healthy	Flavonifractor	Flavonifractor_plautii	0.296911	0.89989	ND
2.5.1.30	healthy	Fusobacterium	Fusobacterium_nucleatum	0	0	ND
2.5.1.30	healthy	Intestinimonas	Intestinimonas_butyriciproducens	0.00516248	0.0372272	ND
2.5.1.30	healthy	Lactobacillus	Lactobacillus_crispatus	0	0	ND
2.5.1.30	healthy	Lactobacillus	Lactobacillus_fermentum	0	0	ND
2.5.1.30	healthy	Lactobacillus	Lactobacillus_johnsonii	0	0	ND
2.5.1.30	healthy	Lactobacillus	Lactobacillus_oris	0	0	ND
2.5.1.30	healthy	Lactobacillus	Lactobacillus_reuteri	0	0	ND
2.5.1.30	healthy	Lactobacillus	Lactobacillus_salivarius	0.00876825	0.0632287	ND
2.5.1.30	healthy	Lactococcus	Lactococcus_lactis	0	0	ND
2.5.1.30	healthy	Mitsuokella	Mitsuokella_multacida	0	0	ND
2.5.1.30	healthy	Parvimonas	Parvimonas_micra	0	0	ND
2.5.1.30	healthy	Parvimonas	Parvimonas_sp_oral_taxon_393	0	0	ND
2.5.1.30	healthy	Prevotella	Prevotella_intermedia	0	0	ND
2.5.1.30	healthy	Prevotella	Prevotella_nigrescens	0	0	ND
2.5.1.30	healthy	Streptococcus	Streptococcus_infantis	0	0	ND
2.5.1.30	healthy	Streptococcus	Streptococcus_oralis	0	0	ND
2.5.1.30	healthy	Streptococcus	Streptococcus_salivarius	0	0	ND
2.5.1.30	healthy	Turicibacter	Turicibacter_sanguinis	0	0	ND
2.5.1.30	healthy	unclassified	Unclassified	1.10791	1.4951	ND
2.5.1.30	healthy	Weissella	Weissella_confusa	0	0	ND
2.5.1.31	compensated	Aeromonas	Aeromonas_allosaccharophila	0	0	0.613281
2.5.1.31	compensated	Aeromonas	Aeromonas_caviae	0	0	0.613281
2.5.1.31	compensated	Aeromonas	Aeromonas_veronii	0	0	0.613281
2.5.1.31	compensated	Aggregatibacter	Aggregatibacter_segnis	0.0255757	0.0986521	0.613281
2.5.1.31	compensated	Aggregatibacter	Aggregatibacter_sp_oral_taxon_458	0.00155554	0.00780353	0.613281
2.5.1.31	compensated	Bifidobacterium	Bifidobacterium_bifidum	0.0175565	0.0854554	0.613281
2.5.1.31	compensated	Citrobacter	Citrobacter_braakii	0.00923698	0.0447929	0.613281
2.5.1.31	compensated	Citrobacter	Citrobacter_europaeus	0	0	0.613281
2.5.1.31	compensated	Citrobacter	Citrobacter_freundii	0.0120609	0.0596121	0.613281
2.5.1.31	compensated	Citrobacter	Citrobacter_portucalensis	0.0108072	0.0409454	0.613281
2.5.1.31	compensated	Citrobacter	Citrobacter_werkmanii	0	0	0.613281
2.5.1.31	compensated	Citrobacter	Citrobacter_youngae	0.0110088	0.0603145	0.613281
2.5.1.31	compensated	Clostridioides	Clostridioides_difficile	0.0140364	0.0972467	0.613281
2.5.1.31	compensated	Clostridium	Clostridium_disporicum	0.0538131	0.263661	0.613281
2.5.1.31	compensated	Clostridium	Clostridium_perfringens	0.242867	0.900348	0.613281
2.5.1.31	compensated	Lachnoclostridium	Clostridium_symbiosum	0.0544637	0.19531	0.613281
2.5.1.31	compensated	Enterobacter	Enterobacter_cloacae_complex	0.0391146	0.18969	0.613281
2.5.1.31	compensated	Enterobacter	Enterobacter_mori	0.00279729	0.0193802	0.613281
2.5.1.31	compensated	Erysipelatoclostridium	Erysipelatoclostridium_ramosum	0.0449481	0.218759	0.613281
2.5.1.31	compensated	Escherichia	Escherichia_coli	1.06024	2.18591	0.613281
2.5.1.31	compensated	Faecalibacterium	Faecalibacterium_prausnitzii	3.59457	6.52595	0.613281
2.5.1.31	compensated	Haemophilus	Haemophilus_haemolyticus	0	0	0.613281
2.5.1.31	compensated	Haemophilus	Haemophilus_parahaemolyticus	0.0927001	0.432934	0.613281
2.5.1.31	compensated	Haemophilus	Haemophilus_parainfluenzae	1.48669	2.9506	0.613281
2.5.1.31	compensated	Haemophilus	Haemophilus_paraphrohaemolyticus	0	0	0.613281
2.5.1.31	compensated	Haemophilus	Haemophilus_quentini	0	0	0.613281
2.5.1.31	compensated	Haemophilus	Haemophilus_sp_HMSC71H05	0.0688078	0.222471	0.613281
2.5.1.31	compensated	Haemophilus	Haemophilus_sputorum	0.00703715	0.0487548	0.613281
2.5.1.31	compensated	Klebsiella	Klebsiella_aerogenes	0.0627157	0.408171	0.613281
2.5.1.31	compensated	Klebsiella	Klebsiella_oxytoca	0	0	0.613281
2.5.1.31	compensated	Klebsiella	Klebsiella_pneumoniae	1.11344	5.02345	0.613281
2.5.1.31	compensated	Klebsiella	Klebsiella_quasipneumoniae	0.0316114	0.136108	0.613281
2.5.1.31	compensated	Klebsiella	Klebsiella_variicola	0.0232389	0.0925431	0.613281
2.5.1.31	compensated	Kluyvera	Kluyvera_ascorbata	0.000560479	0.00388311	0.613281
2.5.1.31	compensated	Kluyvera	Kluyvera_cryocrescens	0	0	0.613281
2.5.1.31	compensated	Kluyvera	Kluyvera_georgiana	0	0	0.613281
2.5.1.31	compensated	Leclercia	Leclercia_adecarboxylata	0	0	0.613281
2.5.1.31	compensated	Morganella	Morganella_morganii	0.00369788	0.0256196	0.613281
2.5.1.31	compensated	Proteus	Proteus_hauseri	0.00306421	0.0212295	0.613281
2.5.1.31	compensated	Proteus	Proteus_vulgaris	0.000559625	0.0038772	0.613281
2.5.1.31	compensated	Providencia	Providencia_alcalifaciens	0.00393248	0.027245	0.613281
2.5.1.31	compensated	Raoultella	Raoultella_ornithinolytica	0.000540375	0.00374383	0.613281
2.5.1.31	compensated	Raoultella	Raoultella_planticola	0	0	0.613281
2.5.1.31	compensated	Roseburia	Roseburia_faecis	0.196001	0.59516	0.613281
2.5.1.31	compensated	Shewanella	Shewanella_algae	0	0	0.613281
2.5.1.31	compensated	unclassified	Unclassified	1.13195	1.71921	0.613281
2.5.1.31	decompensated	Aeromonas	Aeromonas_allosaccharophila	0.0177905	0.0836153	0.0562305
2.5.1.31	decompensated	Aeromonas	Aeromonas_caviae	0.0389639	0.181505	0.0562305
2.5.1.31	decompensated	Aeromonas	Aeromonas_veronii	0.116264	0.474896	0.0562305
2.5.1.31	decompensated	Aggregatibacter	Aggregatibacter_segnis	0.111766	0.585697	0.0562305
2.5.1.31	decompensated	Aggregatibacter	Aggregatibacter_sp_oral_taxon_458	0.0140927	0.0800059	0.0562305
2.5.1.31	decompensated	Bifidobacterium	Bifidobacterium_bifidum	0	0	0.0562305
2.5.1.31	decompensated	Citrobacter	Citrobacter_braakii	0.00698845	0.0335587	0.0562305
2.5.1.31	decompensated	Citrobacter	Citrobacter_europaeus	0.00961239	0.0637614	0.0562305
2.5.1.31	decompensated	Citrobacter	Citrobacter_freundii	0.0154456	0.0885823	0.0562305
2.5.1.31	decompensated	Citrobacter	Citrobacter_portucalensis	0.004358	0.0289077	0.0562305
2.5.1.31	decompensated	Citrobacter	Citrobacter_werkmanii	0.0011157	0.00740075	0.0562305
2.5.1.31	decompensated	Citrobacter	Citrobacter_youngae	0.00918589	0.041663	0.0562305
2.5.1.31	decompensated	Clostridioides	Clostridioides_difficile	0	0	0.0562305
2.5.1.31	decompensated	Clostridium	Clostridium_disporicum	0.0768999	0.438384	0.0562305
2.5.1.31	decompensated	Clostridium	Clostridium_perfringens	0.116654	0.391465	0.0562305
2.5.1.31	decompensated	Lachnoclostridium	Clostridium_symbiosum	0.0225644	0.120064	0.0562305
2.5.1.31	decompensated	Enterobacter	Enterobacter_cloacae_complex	0.0489081	0.266141	0.0562305
2.5.1.31	decompensated	Enterobacter	Enterobacter_mori	0	0	0.0562305
2.5.1.31	decompensated	Erysipelatoclostridium	Erysipelatoclostridium_ramosum	0.0149551	0.0589426	0.0562305
2.5.1.31	decompensated	Escherichia	Escherichia_coli	7.86605	17.4653	0.0562305
2.5.1.31	decompensated	Faecalibacterium	Faecalibacterium_prausnitzii	4.73073	5.09628	0.0562305
2.5.1.31	decompensated	Haemophilus	Haemophilus_haemolyticus	0.0123801	0.0730662	0.0562305
2.5.1.31	decompensated	Haemophilus	Haemophilus_parahaemolyticus	0.0156293	0.0745302	0.0562305
2.5.1.31	decompensated	Haemophilus	Haemophilus_parainfluenzae	1.12016	1.90118	0.0562305
2.5.1.31	decompensated	Haemophilus	Haemophilus_paraphrohaemolyticus	0.0232468	0.154202	0.0562305
2.5.1.31	decompensated	Haemophilus	Haemophilus_quentini	0.00209491	0.0138961	0.0562305
2.5.1.31	decompensated	Haemophilus	Haemophilus_sp_HMSC71H05	0.481225	1.45966	0.0562305
2.5.1.31	decompensated	Haemophilus	Haemophilus_sputorum	0	0	0.0562305
2.5.1.31	decompensated	Klebsiella	Klebsiella_aerogenes	0	0	0.0562305
2.5.1.31	decompensated	Klebsiella	Klebsiella_oxytoca	1.32414	6.14298	0.0562305
2.5.1.31	decompensated	Klebsiella	Klebsiella_pneumoniae	1.34933	5.57667	0.0562305
2.5.1.31	decompensated	Klebsiella	Klebsiella_quasipneumoniae	0.0534925	0.15342	0.0562305
2.5.1.31	decompensated	Klebsiella	Klebsiella_variicola	0.116961	0.585951	0.0562305
2.5.1.31	decompensated	Kluyvera	Kluyvera_ascorbata	0.0131233	0.0870502	0.0562305
2.5.1.31	decompensated	Kluyvera	Kluyvera_cryocrescens	0.00773857	0.0513319	0.0562305
2.5.1.31	decompensated	Kluyvera	Kluyvera_georgiana	0.00496086	0.0329066	0.0562305
2.5.1.31	decompensated	Leclercia	Leclercia_adecarboxylata	0.0054495	0.0361479	0.0562305
2.5.1.31	decompensated	Morganella	Morganella_morganii	0	0	0.0562305
2.5.1.31	decompensated	Proteus	Proteus_hauseri	0	0	0.0562305
2.5.1.31	decompensated	Proteus	Proteus_vulgaris	0	0	0.0562305
2.5.1.31	decompensated	Providencia	Providencia_alcalifaciens	0	0	0.0562305
2.5.1.31	decompensated	Raoultella	Raoultella_ornithinolytica	0.0130852	0.0867976	0.0562305
2.5.1.31	decompensated	Raoultella	Raoultella_planticola	0.00334375	0.0221799	0.0562305
2.5.1.31	decompensated	Roseburia	Roseburia_faecis	0.14243	0.944777	0.0562305
2.5.1.31	decompensated	Shewanella	Shewanella_algae	0.00483964	0.0321025	0.0562305
2.5.1.31	decompensated	unclassified	Unclassified	0.840269	1.18858	0.0562305
2.5.1.31	healthy	Aeromonas	Aeromonas_allosaccharophila	0	0	ND
2.5.1.31	healthy	Aeromonas	Aeromonas_caviae	0	0	ND
2.5.1.31	healthy	Aeromonas	Aeromonas_veronii	0	0	ND
2.5.1.31	healthy	Aggregatibacter	Aggregatibacter_segnis	0	0	ND
2.5.1.31	healthy	Aggregatibacter	Aggregatibacter_sp_oral_taxon_458	0	0	ND
2.5.1.31	healthy	Bifidobacterium	Bifidobacterium_bifidum	0	0	ND
2.5.1.31	healthy	Citrobacter	Citrobacter_braakii	0.00207792	0.0149841	ND
2.5.1.31	healthy	Citrobacter	Citrobacter_europaeus	0	0	ND
2.5.1.31	healthy	Citrobacter	Citrobacter_freundii	0	0	ND
2.5.1.31	healthy	Citrobacter	Citrobacter_portucalensis	0.00072625	0.00523706	ND
2.5.1.31	healthy	Citrobacter	Citrobacter_werkmanii	0	0	ND
2.5.1.31	healthy	Citrobacter	Citrobacter_youngae	0.00887688	0.0545003	ND
2.5.1.31	healthy	Clostridioides	Clostridioides_difficile	0	0	ND
2.5.1.31	healthy	Clostridium	Clostridium_disporicum	0.0110116	0.0590817	ND
2.5.1.31	healthy	Clostridium	Clostridium_perfringens	0	0	ND
2.5.1.31	healthy	Lachnoclostridium	Clostridium_symbiosum	0.00674375	0.0486299	ND
2.5.1.31	healthy	Enterobacter	Enterobacter_cloacae_complex	0.00754383	0.0493382	ND
2.5.1.31	healthy	Enterobacter	Enterobacter_mori	0	0	ND
2.5.1.31	healthy	Erysipelatoclostridium	Erysipelatoclostridium_ramosum	0.00438056	0.0315887	ND
2.5.1.31	healthy	Escherichia	Escherichia_coli	1.23374	3.51845	ND
2.5.1.31	healthy	Faecalibacterium	Faecalibacterium_prausnitzii	2.96854	3.06463	ND
2.5.1.31	healthy	Haemophilus	Haemophilus_haemolyticus	0	0	ND
2.5.1.31	healthy	Haemophilus	Haemophilus_parahaemolyticus	0	0	ND
2.5.1.31	healthy	Haemophilus	Haemophilus_parainfluenzae	0.0705305	0.288785	ND
2.5.1.31	healthy	Haemophilus	Haemophilus_paraphrohaemolyticus	0	0	ND
2.5.1.31	healthy	Haemophilus	Haemophilus_quentini	0	0	ND
2.5.1.31	healthy	Haemophilus	Haemophilus_sp_HMSC71H05	0	0	ND
2.5.1.31	healthy	Haemophilus	Haemophilus_sputorum	0	0	ND
2.5.1.31	healthy	Klebsiella	Klebsiella_aerogenes	0	0	ND
2.5.1.31	healthy	Klebsiella	Klebsiella_oxytoca	0	0	ND
2.5.1.31	healthy	Klebsiella	Klebsiella_pneumoniae	0.189072	0.873881	ND
2.5.1.31	healthy	Klebsiella	Klebsiella_quasipneumoniae	0.00732931	0.0313876	ND
2.5.1.31	healthy	Klebsiella	Klebsiella_variicola	0.0278065	0.153796	ND
2.5.1.31	healthy	Kluyvera	Kluyvera_ascorbata	0.00212565	0.0153283	ND
2.5.1.31	healthy	Kluyvera	Kluyvera_cryocrescens	0	0	ND
2.5.1.31	healthy	Kluyvera	Kluyvera_georgiana	0	0	ND
2.5.1.31	healthy	Leclercia	Leclercia_adecarboxylata	0	0	ND
2.5.1.31	healthy	Morganella	Morganella_morganii	0	0	ND
2.5.1.31	healthy	Proteus	Proteus_hauseri	0	0	ND
2.5.1.31	healthy	Proteus	Proteus_vulgaris	0	0	ND
2.5.1.31	healthy	Providencia	Providencia_alcalifaciens	0	0	ND
2.5.1.31	healthy	Raoultella	Raoultella_ornithinolytica	0	0	ND
2.5.1.31	healthy	Raoultella	Raoultella_planticola	0	0	ND
2.5.1.31	healthy	Roseburia	Roseburia_faecis	0.852765	1.8128	ND
2.5.1.31	healthy	Shewanella	Shewanella_algae	0	0	ND
2.5.1.31	healthy	unclassified	Unclassified	0.807978	0.958373	ND
2.7.1.36	compensated	Enterococcus	Enterococcus_faecalis	0.0139052	0.0963383	0.00351317
2.7.1.36	compensated	Enterococcus	Enterococcus_faecium	0	0	0.00351317
2.7.1.36	compensated	Enterococcus	Enterococcus_gallinarum	0	0	0.00351317
2.7.1.36	compensated	Lactobacillus	Lactobacillus_crispatus	0	0	0.00351317
2.7.1.36	compensated	Lactobacillus	Lactobacillus_equicursoris	0	0	0.00351317
2.7.1.36	compensated	Lactobacillus	Lactobacillus_fermentum	0.188326	0.677446	0.00351317
2.7.1.36	compensated	Lactobacillus	Lactobacillus_johnsonii	0	0	0.00351317
2.7.1.36	compensated	Lactobacillus	Lactobacillus_oris	0	0	0.00351317
2.7.1.36	compensated	Lactobacillus	Lactobacillus_reuteri	0	0	0.00351317
2.7.1.36	compensated	Lactobacillus	Lactobacillus_ruminis	0	0	0.00351317
2.7.1.36	compensated	Lactobacillus	Lactobacillus_ruminis_CAG_367	0	0	0.00351317
2.7.1.36	compensated	Lactobacillus	Lactobacillus_salivarius	1.06136	3.13933	0.00351317
2.7.1.36	compensated	Lactobacillus	Lactobacillus_vaginalis	0	0	0.00351317
2.7.1.36	compensated	Methanobrevibacter	Methanobrevibacter_smithii	0.021151	0.116671	0.00351317
2.7.1.36	compensated	Methanobrevibacter	Methanobrevibacter_smithii_CAG_186	0.0148769	0.0761196	0.00351317
2.7.1.36	compensated	Staphylococcus	Staphylococcus_capitis	0.00963869	0.0667788	0.00351317
2.7.1.36	compensated	Streptococcus	Streptococcus_anginosus_group	0.00451354	0.0312707	0.00351317
2.7.1.36	compensated	Streptococcus	Streptococcus_australis	0.00656573	0.0325943	0.00351317
2.7.1.36	compensated	Streptococcus	Streptococcus_cristatus	0	0	0.00351317
2.7.1.36	compensated	Streptococcus	Streptococcus_gordonii	0.0156111	0.0618544	0.00351317
2.7.1.36	compensated	Streptococcus	Streptococcus_infantis	0.0800024	0.494072	0.00351317
2.7.1.36	compensated	Streptococcus	Streptococcus_milleri	0.00388394	0.0269087	0.00351317
2.7.1.36	compensated	Streptococcus	Streptococcus_mitis	0.0188615	0.119043	0.00351317
2.7.1.36	compensated	Streptococcus	Streptococcus_oralis	0.0506406	0.308065	0.00351317
2.7.1.36	compensated	Streptococcus	Streptococcus_parasanguinis	0.54714	0.903468	0.00351317
2.7.1.36	compensated	Streptococcus	Streptococcus_peroris	0	0	0.00351317
2.7.1.36	compensated	Streptococcus	Streptococcus_salivarius	1.74429	5.10949	0.00351317
2.7.1.36	compensated	Streptococcus	Streptococcus_salivarius_CAG_79	1.7198	4.42921	0.00351317
2.7.1.36	compensated	Streptococcus	Streptococcus_sanguinis	0.0100304	0.0500641	0.00351317
2.7.1.36	compensated	Streptococcus	Streptococcus_sp_A12	0.00569475	0.0394544	0.00351317
2.7.1.36	compensated	Streptococcus	Streptococcus_sp_F0442	0.0224065	0.155236	0.00351317
2.7.1.36	compensated	Streptococcus	Streptococcus_sp_HMSC034E03	0.0149166	0.103345	0.00351317
2.7.1.36	compensated	Streptococcus	Streptococcus_sp_HPH0090	0.11294	0.782471	0.00351317
2.7.1.36	compensated	Streptococcus	Streptococcus_thermophilus	0.0336091	0.172341	0.00351317
2.7.1.36	compensated	Streptococcus	Streptococcus_thermophilus_CAG_236	0.0729217	0.289967	0.00351317
2.7.1.36	compensated	Streptococcus	Streptococcus_vestibularis	0.621561	1.65573	0.00351317
2.7.1.36	compensated	unclassified	Unclassified	0.102191	0.326687	0.00351317
2.7.1.36	compensated	Weissella	Weissella_confusa	0.00423667	0.0293525	0.00351317
2.7.1.36	decompensated	Enterococcus	Enterococcus_faecalis	0	0	0.0158321
2.7.1.36	decompensated	Enterococcus	Enterococcus_faecium	0	0	0.0158321
2.7.1.36	decompensated	Enterococcus	Enterococcus_gallinarum	0	0	0.0158321
2.7.1.36	decompensated	Lactobacillus	Lactobacillus_crispatus	0.00473884	0.0314339	0.0158321
2.7.1.36	decompensated	Lactobacillus	Lactobacillus_equicursoris	0.0156336	0.103702	0.0158321
2.7.1.36	decompensated	Lactobacillus	Lactobacillus_fermentum	0.0545317	0.248642	0.0158321
2.7.1.36	decompensated	Lactobacillus	Lactobacillus_johnsonii	0	0	0.0158321
2.7.1.36	decompensated	Lactobacillus	Lactobacillus_oris	0.0128295	0.0677645	0.0158321
2.7.1.36	decompensated	Lactobacillus	Lactobacillus_reuteri	0.0154265	0.102328	0.0158321
2.7.1.36	decompensated	Lactobacillus	Lactobacillus_ruminis	0	0	0.0158321
2.7.1.36	decompensated	Lactobacillus	Lactobacillus_ruminis_CAG_367	0	0	0.0158321
2.7.1.36	decompensated	Lactobacillus	Lactobacillus_salivarius	1.6036	6.18494	0.0158321
2.7.1.36	decompensated	Lactobacillus	Lactobacillus_vaginalis	0.00396784	0.0263197	0.0158321
2.7.1.36	decompensated	Methanobrevibacter	Methanobrevibacter_smithii	0.00444298	0.0294714	0.0158321
2.7.1.36	decompensated	Methanobrevibacter	Methanobrevibacter_smithii_CAG_186	0.00493884	0.0327606	0.0158321
2.7.1.36	decompensated	Staphylococcus	Staphylococcus_capitis	0	0	0.0158321
2.7.1.36	decompensated	Streptococcus	Streptococcus_anginosus_group	0	0	0.0158321
2.7.1.36	decompensated	Streptococcus	Streptococcus_australis	0.0111819	0.0741725	0.0158321
2.7.1.36	decompensated	Streptococcus	Streptococcus_cristatus	0.0134774	0.0674262	0.0158321
2.7.1.36	decompensated	Streptococcus	Streptococcus_gordonii	0.00853686	0.0403229	0.0158321
2.7.1.36	decompensated	Streptococcus	Streptococcus_infantis	0.00643023	0.0426533	0.0158321
2.7.1.36	decompensated	Streptococcus	Streptococcus_milleri	0	0	0.0158321
2.7.1.36	decompensated	Streptococcus	Streptococcus_mitis	0.00671089	0.0289115	0.0158321
2.7.1.36	decompensated	Streptococcus	Streptococcus_oralis	0.0261723	0.087786	0.0158321
2.7.1.36	decompensated	Streptococcus	Streptococcus_parasanguinis	0.47201	0.93575	0.0158321
2.7.1.36	decompensated	Streptococcus	Streptococcus_peroris	0	0	0.0158321
2.7.1.36	decompensated	Streptococcus	Streptococcus_salivarius	0.650583	1.4414	0.0158321
2.7.1.36	decompensated	Streptococcus	Streptococcus_salivarius_CAG_79	0.929078	1.87298	0.0158321
2.7.1.36	decompensated	Streptococcus	Streptococcus_sanguinis	0.00245882	0.0129994	0.0158321
2.7.1.36	decompensated	Streptococcus	Streptococcus_sp_A12	0	0	0.0158321
2.7.1.36	decompensated	Streptococcus	Streptococcus_sp_F0442	0.0575025	0.231054	0.0158321
2.7.1.36	decompensated	Streptococcus	Streptococcus_sp_HMSC034E03	0	0	0.0158321
2.7.1.36	decompensated	Streptococcus	Streptococcus_sp_HPH0090	0.008964	0.0594604	0.0158321
2.7.1.36	decompensated	Streptococcus	Streptococcus_thermophilus	0	0	0.0158321
2.7.1.36	decompensated	Streptococcus	Streptococcus_thermophilus_CAG_236	0	0	0.0158321
2.7.1.36	decompensated	Streptococcus	Streptococcus_vestibularis	0.262345	0.459076	0.0158321
2.7.1.36	decompensated	unclassified	Unclassified	0.250429	0.910996	0.0158321
2.7.1.36	decompensated	Weissella	Weissella_confusa	0	0	0.0158321
2.7.1.36	healthy	Enterococcus	Enterococcus_faecalis	0	0	ND
2.7.1.36	healthy	Enterococcus	Enterococcus_faecium	0.00463308	0.0334096	ND
2.7.1.36	healthy	Enterococcus	Enterococcus_gallinarum	0	0	ND
2.7.1.36	healthy	Lactobacillus	Lactobacillus_crispatus	0	0	ND
2.7.1.36	healthy	Lactobacillus	Lactobacillus_equicursoris	0	0	ND
2.7.1.36	healthy	Lactobacillus	Lactobacillus_fermentum	0	0	ND
2.7.1.36	healthy	Lactobacillus	Lactobacillus_johnsonii	0	0	ND
2.7.1.36	healthy	Lactobacillus	Lactobacillus_oris	0	0	ND
2.7.1.36	healthy	Lactobacillus	Lactobacillus_reuteri	0	0	ND
2.7.1.36	healthy	Lactobacillus	Lactobacillus_ruminis	0.0120661	0.0661212	ND
2.7.1.36	healthy	Lactobacillus	Lactobacillus_ruminis_CAG_367	0.0153432	0.085359	ND
2.7.1.36	healthy	Lactobacillus	Lactobacillus_salivarius	0.0083906	0.0605054	ND
2.7.1.36	healthy	Lactobacillus	Lactobacillus_vaginalis	0	0	ND
2.7.1.36	healthy	Methanobrevibacter	Methanobrevibacter_smithii	0.00983612	0.049783	ND
2.7.1.36	healthy	Methanobrevibacter	Methanobrevibacter_smithii_CAG_186	0.00524052	0.0305373	ND
2.7.1.36	healthy	Staphylococcus	Staphylococcus_capitis	0.00653565	0.0471293	ND
2.7.1.36	healthy	Streptococcus	Streptococcus_anginosus_group	0	0	ND
2.7.1.36	healthy	Streptococcus	Streptococcus_australis	0	0	ND
2.7.1.36	healthy	Streptococcus	Streptococcus_cristatus	0	0	ND
2.7.1.36	healthy	Streptococcus	Streptococcus_gordonii	0	0	ND
2.7.1.36	healthy	Streptococcus	Streptococcus_infantis	0	0	ND
2.7.1.36	healthy	Streptococcus	Streptococcus_milleri	0	0	ND
2.7.1.36	healthy	Streptococcus	Streptococcus_mitis	0	0	ND
2.7.1.36	healthy	Streptococcus	Streptococcus_oralis	0	0	ND
2.7.1.36	healthy	Streptococcus	Streptococcus_parasanguinis	0.00359219	0.0259037	ND
2.7.1.36	healthy	Streptococcus	Streptococcus_peroris	0	0	ND
2.7.1.36	healthy	Streptococcus	Streptococcus_salivarius	0.0336759	0.0898173	ND
2.7.1.36	healthy	Streptococcus	Streptococcus_salivarius_CAG_79	0.0573983	0.242525	ND
2.7.1.36	healthy	Streptococcus	Streptococcus_sanguinis	0	0	ND
2.7.1.36	healthy	Streptococcus	Streptococcus_sp_A12	0	0	ND
2.7.1.36	healthy	Streptococcus	Streptococcus_sp_F0442	0	0	ND
2.7.1.36	healthy	Streptococcus	Streptococcus_sp_HMSC034E03	0	0	ND
2.7.1.36	healthy	Streptococcus	Streptococcus_sp_HPH0090	0	0	ND
2.7.1.36	healthy	Streptococcus	Streptococcus_thermophilus	0.0169948	0.0681435	ND
2.7.1.36	healthy	Streptococcus	Streptococcus_thermophilus_CAG_236	0.008705	0.0506923	ND
2.7.1.36	healthy	Streptococcus	Streptococcus_vestibularis	0	0	ND
2.7.1.36	healthy	unclassified	Unclassified	0.188739	0.390978	ND
2.7.1.36	healthy	Weissella	Weissella_confusa	0	0	ND
2.7.4.2	compensated	Enterococcus	Enterococcus_faecalis	0.0167119	0.115784	0.00023496
2.7.4.2	compensated	Lactobacillus	Lactobacillus_fermentum	0.161282	0.567896	0.00023496
2.7.4.2	compensated	Lactobacillus	Lactobacillus_oris	0	0	0.00023496
2.7.4.2	compensated	Lactobacillus	Lactobacillus_reuteri	0	0	0.00023496
2.7.4.2	compensated	Lactobacillus	Lactobacillus_ruminis	0	0	0.00023496
2.7.4.2	compensated	Lactobacillus	Lactobacillus_ruminis_CAG_367	0	0	0.00023496
2.7.4.2	compensated	Lactobacillus	Lactobacillus_salivarius	0.907508	2.51506	0.00023496
2.7.4.2	compensated	Streptococcus	Streptococcus_australis	0.00704196	0.0406673	0.00023496
2.7.4.2	compensated	Streptococcus	Streptococcus_cristatus	0.002352	0.0162951	0.00023496
2.7.4.2	compensated	Streptococcus	Streptococcus_infantis	0.0506071	0.253621	0.00023496
2.7.4.2	compensated	Streptococcus	Streptococcus_mitis	0.0346871	0.240319	0.00023496
2.7.4.2	compensated	Streptococcus	Streptococcus_oralis	0.0611766	0.423844	0.00023496
2.7.4.2	compensated	Streptococcus	Streptococcus_pasteurianus	0.0412781	0.285983	0.00023496
2.7.4.2	compensated	Streptococcus	Streptococcus_peroris	0	0	0.00023496
2.7.4.2	compensated	Streptococcus	Streptococcus_salivarius	2.36216	6.04986	0.00023496
2.7.4.2	compensated	Streptococcus	Streptococcus_sp_A12	0.0052224	0.0361818	0.00023496
2.7.4.2	compensated	Streptococcus	Streptococcus_sp_HMSC034E03	0.0027165	0.0188205	0.00023496
2.7.4.2	compensated	Streptococcus	Streptococcus_sp_HPH0090	0.121976	0.845076	0.00023496
2.7.4.2	compensated	Streptococcus	Streptococcus_thermophilus	0.0367764	0.154074	0.00023496
2.7.4.2	compensated	Streptococcus	Streptococcus_thermophilus_CAG_236	0.0421587	0.172142	0.00023496
2.7.4.2	compensated	Streptococcus	Streptococcus_vestibularis	1.39356	4.76166	0.00023496
2.7.4.2	compensated	unclassified	Unclassified	0.878319	2.78972	0.00023496
2.7.4.2	decompensated	Enterococcus	Enterococcus_faecalis	0	0	0.000265885
2.7.4.2	decompensated	Lactobacillus	Lactobacillus_fermentum	0.0386547	0.17054	0.000265885
2.7.4.2	decompensated	Lactobacillus	Lactobacillus_oris	0.0184325	0.108978	0.000265885
2.7.4.2	decompensated	Lactobacillus	Lactobacillus_reuteri	0.0538786	0.35739	0.000265885
2.7.4.2	decompensated	Lactobacillus	Lactobacillus_ruminis	0	0	0.000265885
2.7.4.2	decompensated	Lactobacillus	Lactobacillus_ruminis_CAG_367	0	0	0.000265885
2.7.4.2	decompensated	Lactobacillus	Lactobacillus_salivarius	1.76975	5.87969	0.000265885
2.7.4.2	decompensated	Streptococcus	Streptococcus_australis	0.0138061	0.0915791	0.000265885
2.7.4.2	decompensated	Streptococcus	Streptococcus_cristatus	0.0126559	0.0839498	0.000265885
2.7.4.2	decompensated	Streptococcus	Streptococcus_infantis	0.00902459	0.0598624	0.000265885
2.7.4.2	decompensated	Streptococcus	Streptococcus_mitis	0.00997532	0.04685	0.000265885
2.7.4.2	decompensated	Streptococcus	Streptococcus_oralis	0.0210441	0.0887144	0.000265885
2.7.4.2	decompensated	Streptococcus	Streptococcus_pasteurianus	0.0178955	0.118705	0.000265885
2.7.4.2	decompensated	Streptococcus	Streptococcus_peroris	0	0	0.000265885
2.7.4.2	decompensated	Streptococcus	Streptococcus_salivarius	1.17064	2.03114	0.000265885
2.7.4.2	decompensated	Streptococcus	Streptococcus_sp_A12	0	0	0.000265885
2.7.4.2	decompensated	Streptococcus	Streptococcus_sp_HMSC034E03	0	0	0.000265885
2.7.4.2	decompensated	Streptococcus	Streptococcus_sp_HPH0090	0.0117803	0.0781419	0.000265885
2.7.4.2	decompensated	Streptococcus	Streptococcus_thermophilus	0	0	0.000265885
2.7.4.2	decompensated	Streptococcus	Streptococcus_thermophilus_CAG_236	0	0	0.000265885
2.7.4.2	decompensated	Streptococcus	Streptococcus_vestibularis	0.619322	1.09864	0.000265885
2.7.4.2	decompensated	unclassified	Unclassified	0.618106	1.30208	0.000265885
2.7.4.2	healthy	Enterococcus	Enterococcus_faecalis	0	0	ND
2.7.4.2	healthy	Lactobacillus	Lactobacillus_fermentum	0	0	ND
2.7.4.2	healthy	Lactobacillus	Lactobacillus_oris	0	0	ND
2.7.4.2	healthy	Lactobacillus	Lactobacillus_reuteri	0	0	ND
2.7.4.2	healthy	Lactobacillus	Lactobacillus_ruminis	0.0247132	0.128859	ND
2.7.4.2	healthy	Lactobacillus	Lactobacillus_ruminis_CAG_367	0.0209656	0.116354	ND
2.7.4.2	healthy	Lactobacillus	Lactobacillus_salivarius	0.00660237	0.0476103	ND
2.7.4.2	healthy	Streptococcus	Streptococcus_australis	0.0049265	0.0355255	ND
2.7.4.2	healthy	Streptococcus	Streptococcus_cristatus	0	0	ND
2.7.4.2	healthy	Streptococcus	Streptococcus_infantis	0	0	ND
2.7.4.2	healthy	Streptococcus	Streptococcus_mitis	0	0	ND
2.7.4.2	healthy	Streptococcus	Streptococcus_oralis	0	0	ND
2.7.4.2	healthy	Streptococcus	Streptococcus_pasteurianus	0.00499296	0.0360048	ND
2.7.4.2	healthy	Streptococcus	Streptococcus_peroris	0	0	ND
2.7.4.2	healthy	Streptococcus	Streptococcus_salivarius	0.0782154	0.276389	ND
2.7.4.2	healthy	Streptococcus	Streptococcus_sp_A12	0.00211352	0.0152408	ND
2.7.4.2	healthy	Streptococcus	Streptococcus_sp_HMSC034E03	0	0	ND
2.7.4.2	healthy	Streptococcus	Streptococcus_sp_HPH0090	0	0	ND
2.7.4.2	healthy	Streptococcus	Streptococcus_thermophilus	0.00814458	0.044657	ND
2.7.4.2	healthy	Streptococcus	Streptococcus_thermophilus_CAG_236	0.00940363	0.0468628	ND
2.7.4.2	healthy	Streptococcus	Streptococcus_vestibularis	0	0	ND
2.7.4.2	healthy	unclassified	Unclassified	0.010914	0.0451968	ND
4.1.1.33	compensated	Blastocystis	Blastocystis_sp_subtype_1	0	0	0.000265885
4.1.1.33	compensated	Enterococcus	Enterococcus_casseliflavus	0	0	0.000265885
4.1.1.33	compensated	Enterococcus	Enterococcus_faecalis	0.01313	0.0909675	0.000265885
4.1.1.33	compensated	Enterococcus	Enterococcus_gallinarum	0	0	0.000265885
4.1.1.33	compensated	Lactobacillus	Lactobacillus_crispatus	0	0	0.000265885
4.1.1.33	compensated	Lactobacillus	Lactobacillus_fermentum	0.201309	0.730479	0.000265885
4.1.1.33	compensated	Lactobacillus	Lactobacillus_johnsonii	0	0	0.000265885
4.1.1.33	compensated	Lactobacillus	Lactobacillus_oris	0	0	0.000265885
4.1.1.33	compensated	Lactobacillus	Lactobacillus_reuteri	0	0	0.000265885
4.1.1.33	compensated	Lactobacillus	Lactobacillus_ruminis	0	0	0.000265885
4.1.1.33	compensated	Lactobacillus	Lactobacillus_ruminis_CAG_367	0	0	0.000265885
4.1.1.33	compensated	Lactobacillus	Lactobacillus_vaginalis	0	0	0.000265885
4.1.1.33	compensated	Staphylococcus	Staphylococcus_aureus	0	0	0.000265885
4.1.1.33	compensated	Staphylococcus	Staphylococcus_capitis	0	0	0.000265885
4.1.1.33	compensated	Streptococcus	Streptococcus_anginosus_group	0.124785	0.340747	0.000265885
4.1.1.33	compensated	Streptococcus	Streptococcus_australis	0.0104079	0.0577362	0.000265885
4.1.1.33	compensated	Streptococcus	Streptococcus_cristatus	0.00460965	0.0319366	0.000265885
4.1.1.33	compensated	Streptococcus	Streptococcus_gordonii	0.0130749	0.0616773	0.000265885
4.1.1.33	compensated	Streptococcus	Streptococcus_infantarius	0.12013	0.494957	0.000265885
4.1.1.33	compensated	Streptococcus	Streptococcus_infantis	0.0813276	0.488817	0.000265885
4.1.1.33	compensated	Streptococcus	Streptococcus_lutetiensis	0.00815671	0.0565113	0.000265885
4.1.1.33	compensated	Streptococcus	Streptococcus_macedonicus	0	0	0.000265885
4.1.1.33	compensated	Streptococcus	Streptococcus_mitis	0.0129187	0.0895037	0.000265885
4.1.1.33	compensated	Streptococcus	Streptococcus_parasanguinis	0.650265	1.10097	0.000265885
4.1.1.33	compensated	Streptococcus	Streptococcus_pasteurianus	0.0497469	0.344656	0.000265885
4.1.1.33	compensated	Streptococcus	Streptococcus_peroris	0	0	0.000265885
4.1.1.33	compensated	Streptococcus	Streptococcus_salivarius	0.00564021	0.030616	0.000265885
4.1.1.33	compensated	Streptococcus	Streptococcus_sanguinis	0.0101411	0.0505103	0.000265885
4.1.1.33	compensated	Streptococcus	Streptococcus_sp_A12	0.00330642	0.0229075	0.000265885
4.1.1.33	compensated	Streptococcus	Streptococcus_sp_F0442	0.0264269	0.183091	0.000265885
4.1.1.33	compensated	Streptococcus	Streptococcus_sp_HMSC034E03	0.017397	0.12053	0.000265885
4.1.1.33	compensated	Streptococcus	Streptococcus_sp_HPH0090	0.122706	0.85013	0.000265885
4.1.1.33	compensated	Streptococcus	Streptococcus_viridans	0.0933203	0.342223	0.000265885
4.1.1.33	compensated	unclassified	Unclassified	0.0744963	0.227234	0.000265885
4.1.1.33	compensated	Weissella	Weissella_confusa	0.0110539	0.0560862	0.000265885
4.1.1.33	decompensated	Blastocystis	Blastocystis_sp_subtype_1	0	0	0.00123757
4.1.1.33	decompensated	Enterococcus	Enterococcus_casseliflavus	0.000488091	0.00323763	0.00123757
4.1.1.33	decompensated	Enterococcus	Enterococcus_faecalis	0.00195125	0.0129431	0.00123757
4.1.1.33	decompensated	Enterococcus	Enterococcus_gallinarum	0.00196316	0.0130221	0.00123757
4.1.1.33	decompensated	Lactobacillus	Lactobacillus_crispatus	0.00443955	0.0294486	0.00123757
4.1.1.33	decompensated	Lactobacillus	Lactobacillus_fermentum	0.0540732	0.21825	0.00123757
4.1.1.33	decompensated	Lactobacillus	Lactobacillus_johnsonii	0	0	0.00123757
4.1.1.33	decompensated	Lactobacillus	Lactobacillus_oris	0.0161822	0.0900883	0.00123757
4.1.1.33	decompensated	Lactobacillus	Lactobacillus_reuteri	0.0460255	0.305298	0.00123757
4.1.1.33	decompensated	Lactobacillus	Lactobacillus_ruminis	0	0	0.00123757
4.1.1.33	decompensated	Lactobacillus	Lactobacillus_ruminis_CAG_367	0	0	0.00123757
4.1.1.33	decompensated	Lactobacillus	Lactobacillus_vaginalis	0.00390868	0.0259273	0.00123757
4.1.1.33	decompensated	Staphylococcus	Staphylococcus_aureus	0	0	0.00123757
4.1.1.33	decompensated	Staphylococcus	Staphylococcus_capitis	0	0	0.00123757
4.1.1.33	decompensated	Streptococcus	Streptococcus_anginosus_group	0.321846	0.644026	0.00123757
4.1.1.33	decompensated	Streptococcus	Streptococcus_australis	0.0135338	0.0897732	0.00123757
4.1.1.33	decompensated	Streptococcus	Streptococcus_cristatus	0.00598732	0.0397154	0.00123757
4.1.1.33	decompensated	Streptococcus	Streptococcus_gordonii	0.000792114	0.00525429	0.00123757
4.1.1.33	decompensated	Streptococcus	Streptococcus_infantarius	0	0	0.00123757
4.1.1.33	decompensated	Streptococcus	Streptococcus_infantis	0.0120923	0.0563784	0.00123757
4.1.1.33	decompensated	Streptococcus	Streptococcus_lutetiensis	0	0	0.00123757
4.1.1.33	decompensated	Streptococcus	Streptococcus_macedonicus	0	0	0.00123757
4.1.1.33	decompensated	Streptococcus	Streptococcus_mitis	0.0211295	0.0839521	0.00123757
4.1.1.33	decompensated	Streptococcus	Streptococcus_parasanguinis	0.527488	1.05097	0.00123757
4.1.1.33	decompensated	Streptococcus	Streptococcus_pasteurianus	0.0224341	0.148811	0.00123757
4.1.1.33	decompensated	Streptococcus	Streptococcus_peroris	0	0	0.00123757
4.1.1.33	decompensated	Streptococcus	Streptococcus_salivarius	0.00473643	0.0314179	0.00123757
4.1.1.33	decompensated	Streptococcus	Streptococcus_sanguinis	0	0	0.00123757
4.1.1.33	decompensated	Streptococcus	Streptococcus_sp_A12	0	0	0.00123757
4.1.1.33	decompensated	Streptococcus	Streptococcus_sp_F0442	0.0846116	0.326884	0.00123757
4.1.1.33	decompensated	Streptococcus	Streptococcus_sp_HMSC034E03	0	0	0.00123757
4.1.1.33	decompensated	Streptococcus	Streptococcus_sp_HPH0090	0.00594105	0.0394084	0.00123757
4.1.1.33	decompensated	Streptococcus	Streptococcus_viridans	0	0	0.00123757
4.1.1.33	decompensated	unclassified	Unclassified	0.0632655	0.165285	0.00123757
4.1.1.33	decompensated	Weissella	Weissella_confusa	0	0	0.00123757
4.1.1.33	healthy	Blastocystis	Blastocystis_sp_subtype_1	0.00370423	0.0267116	ND
4.1.1.33	healthy	Enterococcus	Enterococcus_casseliflavus	0	0	ND
4.1.1.33	healthy	Enterococcus	Enterococcus_faecalis	0	0	ND
4.1.1.33	healthy	Enterococcus	Enterococcus_gallinarum	0	0	ND
4.1.1.33	healthy	Lactobacillus	Lactobacillus_crispatus	0	0	ND
4.1.1.33	healthy	Lactobacillus	Lactobacillus_fermentum	0	0	ND
4.1.1.33	healthy	Lactobacillus	Lactobacillus_johnsonii	0	0	ND
4.1.1.33	healthy	Lactobacillus	Lactobacillus_oris	0	0	ND
4.1.1.33	healthy	Lactobacillus	Lactobacillus_reuteri	0	0	ND
4.1.1.33	healthy	Lactobacillus	Lactobacillus_ruminis	0.0124811	0.0631183	ND
4.1.1.33	healthy	Lactobacillus	Lactobacillus_ruminis_CAG_367	0.015927	0.0871376	ND
4.1.1.33	healthy	Lactobacillus	Lactobacillus_vaginalis	0	0	ND
4.1.1.33	healthy	Staphylococcus	Staphylococcus_aureus	0	0	ND
4.1.1.33	healthy	Staphylococcus	Staphylococcus_capitis	0	0	ND
4.1.1.33	healthy	Streptococcus	Streptococcus_anginosus_group	0	0	ND
4.1.1.33	healthy	Streptococcus	Streptococcus_australis	0.0107005	0.0771625	ND
4.1.1.33	healthy	Streptococcus	Streptococcus_cristatus	0	0	ND
4.1.1.33	healthy	Streptococcus	Streptococcus_gordonii	0	0	ND
4.1.1.33	healthy	Streptococcus	Streptococcus_infantarius	0.00701015	0.0505509	ND
4.1.1.33	healthy	Streptococcus	Streptococcus_infantis	0	0	ND
4.1.1.33	healthy	Streptococcus	Streptococcus_lutetiensis	0	0	ND
4.1.1.33	healthy	Streptococcus	Streptococcus_macedonicus	0	0	ND
4.1.1.33	healthy	Streptococcus	Streptococcus_mitis	0	0	ND
4.1.1.33	healthy	Streptococcus	Streptococcus_parasanguinis	0	0	ND
4.1.1.33	healthy	Streptococcus	Streptococcus_pasteurianus	0.00595056	0.0429101	ND
4.1.1.33	healthy	Streptococcus	Streptococcus_peroris	0	0	ND
4.1.1.33	healthy	Streptococcus	Streptococcus_salivarius	0	0	ND
4.1.1.33	healthy	Streptococcus	Streptococcus_sanguinis	0	0	ND
4.1.1.33	healthy	Streptococcus	Streptococcus_sp_A12	0.00150746	0.0108705	ND
4.1.1.33	healthy	Streptococcus	Streptococcus_sp_F0442	0	0	ND
4.1.1.33	healthy	Streptococcus	Streptococcus_sp_HMSC034E03	0	0	ND
4.1.1.33	healthy	Streptococcus	Streptococcus_sp_HPH0090	0	0	ND
4.1.1.33	healthy	Streptococcus	Streptococcus_viridans	0	0	ND
4.1.1.33	healthy	unclassified	Unclassified	0.021656	0.131166	ND
4.1.1.33	healthy	Weissella	Weissella_confusa	0	0	ND

## Sheet: Table S5
Table S5. Total number of unique EC numbers determined to have greater than zero relative abundance in respective pathway (mevalonate and MEP isoprenoid biosynthesis, and menaquinone biosynthesis) in fecal samples from cirrhosis patients. Diagnosis groups are denoted as healthy (H), compensated (C) or decompensated (D). EC numbers used for analysis are listed to the left of table header and repre…
EC 2.3.1.9, 2.3.3.10, 1.1.1.34, 1.1.1.88, 2.7.1.36, 2.7.4.2, 4.1.1.33	Mevalonate Isoprenoid Biosynthesis				EC 2.2.1.7, 1.1.1.267, 2.7.7.60, 2.7.1.148, 4.6.1.12, 1.17.7.1, 1.17.7.3, 1.17.7.4	MEP Isoprenoid biosynthesis				EC 5.4.4.2, 2.2.1.9, 4.2.99.20, 5.2.99.20, 4.2.1.113, 6.2.1.26, 4.1.3.36, 3.1.2.28, 2.5.1.74, 2.1.1.163	Menaquinone Biosynthesis
species	H	C	D		species	H	C	D		species	H	C	D
Streptococcus_infantis	0	6	6		Acidaminococcus_sp_CAG_542	0	3	0		Escherichia_coli	9	9	9
Streptococcus_mitis	0	6	6		Actinomyces_odontolyticus	0	0	1		Klebsiella_pneumoniae	9	9	9
Streptococcus_cristatus	0	5	6		Actinomyces_oris	0	1	0		Klebsiella_variicola	9	9	9
Lactobacillus_reuteri	0	0	6		Actinomyces_sp_oral_taxon_181	0	7	0		Enterobacter_cloacae_complex	8	9	9
Streptococcus_australis	4	5	5		Aeromonas_allosaccharophila	0	0	7		Citrobacter_portucalensis	7	9	9
Streptococcus_salivarius	3	5	5		Aeromonas_caviae	0	0	7		Citrobacter_freundii	6	9	9
Streptococcus_oralis	0	5	5		Aeromonas_media	0	0	5		Citrobacter_braakii	7	8	9
Streptococcus_sp_HPH0090	0	5	5		Aeromonas_veronii	0	0	7		Citrobacter_europaeus	0	0	9
Streptococcus_anginosus_group	0	5	4		Agathobaculum_butyriciproducens	1	7	7		Klebsiella_oxytoca	0	0	9
Streptococcus_pasteurianus	2	4	4		Aggregatibacter_aphrophilus	0	5	0		Klebsiella_quasipneumoniae	9	9	8
Lactobacillus_fermentum	0	4	4		Aggregatibacter_segnis	0	7	7		Kluyvera_ascorbata	2	2	8
Streptococcus_gordonii	0	4	4		Aggregatibacter_sp_oral_taxon_458	0	7	7		Aeromonas_caviae	0	0	8
Streptococcus_sp_F0442	0	4	4		Akkermansia_muciniphila	0	5	5		Kluyvera_cryocrescens	0	0	8
Lactobacillus_oris	0	0	4		Alistipes_finegoldii	0	7	7		Citrobacter_youngae	6	9	7
Streptococcus_sanguinis	0	4	3		Alistipes_indistinctus	0	4	0		Haemophilus_parainfluenzae	7	7	7
Lactobacillus_salivarius	3	3	3		Alistipes_onderdonkii	0	7	7		Veillonella_atypica	7	7	7
Streptococcus_parasanguinis	1	3	3		Alistipes_putredinis	0	7	7		Veillonella_dispar	6	7	7
Streptococcus_vestibularis	0	3	3		Alistipes_putredinis_CAG_67	0	7	7		Veillonella_parvula	5	7	7
Lactobacillus_paragasseri	0	1	3		Allisonella_histaminiformans	0	4	0		Veillonella_infantium	4	7	7
Lactobacillus_crispatus	0	0	3		Alloprevotella_tannerae	0	7	6		Veillonella_rogosae	0	7	7
Lactobacillus_vaginalis	0	0	3		Anaerostipes_caccae	0	0	7		Veillonella_tobetsuensis	0	7	7
Streptococcus_sp_NLAE_zl_C503	0	0	3		Anaerostipes_hadrus	2	7	7		Raoultella_ornithinolytica	0	3	7
Eubacterium_ramulus	2	2	2		Anaerotignum_lactatifermentans	0	5	6		Haemophilus_paraphrohaemolyticus	0	2	7
Flavonifractor_plautii	2	2	2		Bacteroides_caccae	0	7	7		Kluyvera_georgiana	0	0	7
Methanobrevibacter_smithii	2	2	2		Bacteroides_cellulosilyticus	1	7	7		Haemophilus_haemolyticus	0	0	7
Methanobrevibacter_smithii_CAG_186	2	2	2		Bacteroides_clarus	0	7	7		Haemophilus_parahaemolyticus	0	7	6
Streptococcus_salivarius_CAG_79	2	2	2		Bacteroides_coprocola	0	7	7		Klebsiella_variicola_CAG_634	6	6	6
Lactobacillus_equicursoris	0	0	2		Bacteroides_coprocola_CAG_162	0	7	7		Bacteroides_cellulosilyticus	6	6	6
Lactobacillus_gasseri	0	0	2		Bacteroides_coprophilus	0	7	0		Bacteroides_ovatus	6	6	6
Enterococcus_faecalis	0	7	1		Bacteroides_coprophilus_CAG_333	0	7	0		Bacteroides_thetaiotaomicron	6	6	6
Streptococcus_milleri	0	4	1		Bacteroides_dorei	2	7	7		Bacteroides_vulgatus	6	6	6
Anaerostipes_hadrus	1	1	1		Bacteroides_eggerthii	0	7	7		Bacteroides_xylanisolvens	6	6	6
Butyricimonas_virosa	1	1	1		Bacteroides_faecis	1	6	0		Haemophilus_sp_HMSC71H05	6	6	6
Citrobacter_braakii	1	1	1		Bacteroides_finegoldii	0	7	7		Parabacteroides_distasonis	6	6	6
Citrobacter_freundii	1	1	1		Bacteroides_fragilis	1	8	8		Aggregatibacter_segnis	0	6	6
Citrobacter_portucalensis	1	1	1		Bacteroides_fragilis_CAG_47	1	7	7		Aggregatibacter_sp_oral_taxon_458	0	6	6
Citrobacter_youngae	1	1	1		Bacteroides_heparinolyticus	0	0	1		Prevotella_veroralis	0	4	6
Clostridium_disporicum	1	1	1		Bacteroides_intestinalis	1	7	7		Prevotella_pallens	0	2	6
Comamonas_kerstersii	1	1	1		Bacteroides_massiliensis	0	7	7		Haemophilus_quentini	0	1	6
Coprococcus_catus	1	1	1		Bacteroides_nordii	0	7	7		Aeromonas_allosaccharophila	0	0	6
Enterobacter_cloacae_complex	1	1	1		Bacteroides_oleiciplenus	1	1	0		Aeromonas_media	0	0	6
Escherichia_coli	1	1	1		Bacteroides_ovatus	0	7	7		Aeromonas_veronii	0	0	6
Eubacterium_hallii	1	1	1		Bacteroides_plebeius	0	7	7		Leclercia_adecarboxylata	0	0	6
Eubacterium_hallii_CAG_12	1	1	1		Bacteroides_plebeius_CAG_211	0	7	7		Raoultella_planticola	0	0	6
Eubacterium_rectale	1	1	1		Bacteroides_salyersiae	0	7	7		Prevotella_intermedia	0	0	6
Faecalibacterium_prausnitzii	1	1	1		Bacteroides_sartorii	2	0	0		Bacteroides_caccae	5	5	5
Gemmiger_formicilis	1	1	1		Bacteroides_sp_CAG_530	0	0	5		Bacteroides_dorei	5	5	5
Intestinimonas_butyriciproducens	1	1	1		Bacteroides_sp_D2	0	0	7		Bacteroides_fragilis	5	5	5
Klebsiella_pneumoniae	1	1	1		Bacteroides_sp_OM05_12	0	3	7		Bacteroides_fragilis_CAG_47	5	5	5
Klebsiella_quasipneumoniae	1	1	1		Bacteroides_stercoris	1	7	7		Bacteroides_plebeius	5	5	5
Klebsiella_variicola	1	1	1		Bacteroides_thetaiotaomicron	1	7	7		Bacteroides_stercoris	5	5	5
Klebsiella_variicola_CAG_634	1	1	1		Bacteroides_uniformis	0	7	7		Bacteroides_vulgatus_CAG_6	5	5	5
Megasphaera_elsdenii	1	1	1		Bacteroides_uniformis_CAG_3	0	7	7		Prevotella_buccae	0	5	5
Roseburia_faecis	1	1	1		Bacteroides_vulgatus	2	7	7		Prevotella_denticola	0	5	5
Roseburia_hominis	1	1	1		Bacteroides_vulgatus_CAG_6	2	7	7		Prevotella_multiformis	0	5	5
Roseburia_intestinalis	1	1	1		Bacteroides_xylanisolvens	0	7	7		Prevotella_sp_F0091	0	5	5
Roseburia_intestinalis_CAG_13	1	1	1		Barnesiella_intestinihominis	0	7	7		Prevotella_nigrescens	0	4	5
Roseburia_inulinivorans	1	1	1		Bifidobacterium_bifidum	0	7	0		Prevotella_sp_oral_taxon_306	0	4	5
Roseburia_inulinivorans_CAG_15	1	1	1		Bifidobacterium_bifidum_CAG_234	0	7	0		Bacteroides_sp_D2	5	0	5
Ruminococcus_torques	1	1	1		Bifidobacterium_breve	0	0	5		Citrobacter_werkmanii	0	0	5
Clostridium_celatum	0	1	1		Bifidobacterium_dentium	0	7	7		Haemophilus_influenzae	0	0	5
Clostridium_innocuum	0	1	1		Bifidobacterium_longum	0	7	2		Lactobacillus_fermentum	0	5	4
Clostridium_perfringens	0	1	1		Bifidobacterium_longum_CAG_69	0	6	3		Enterobacter_mori	0	5	4
Fusobacterium_hwasookii	0	1	1		Bifidobacterium_pseudocatenulatum	0	7	7		Prevotella_melaninogenica	0	5	4
Fusobacterium_nucleatum	0	1	1		Bilophila_wadsworthia	0	7	7		Akkermansia_muciniphila	4	4	4
Fusobacterium_periodonticum	0	1	1		Blastocystis_sp_subtype_1	1	0	0		Bacteroides_coprocola	4	4	4
Fusobacterium_sp_oral_taxon_370	0	1	1		Blautia_coccoides	0	5	0		Bacteroides_coprocola_CAG_162	4	4	4
Hungatella_hathewayi	0	1	1		Blautia_hansenii	0	0	7		Bacteroides_eggerthii	4	4	4
Lactobacillus_mucosae	0	1	1		Blautia_obeum	1	7	7		Bacteroides_finegoldii	4	4	4
Raoultella_ornithinolytica	0	1	1		Blautia_sp_CAG_257	0	1	2		Bacteroides_intestinalis	4	4	4
Streptococcus_mutans	0	1	1		Blautia_wexlerae	1	7	7		Bacteroides_massiliensis	4	4	4
Klebsiella_michiganensis	1	0	1		Butyricimonas_virosa	1	7	7		Bacteroides_nordii	4	4	4
Aeromonas_allosaccharophila	0	0	1		Butyrivibrio_crossotus	0	7	0		Bacteroides_plebeius_CAG_211	4	4	4
Aeromonas_caviae	0	0	1		Butyrivibrio_crossotus_CAG_259	0	7	0		Bacteroides_salyersiae	4	4	4
Aeromonas_media	0	0	1		Butyrivibrio_sp_CAG_318	0	1	0		Bacteroides_uniformis	4	4	4
Aeromonas_veronii	0	0	1		Campylobacter_concisus	0	7	7		Barnesiella_intestinihominis	4	4	4
Citrobacter_europaeus	0	0	1		Campylobacter_curvus	0	1	0		Parabacteroides_goldsteinii	4	4	4
Citrobacter_werkmanii	0	0	1		Campylobacter_gracilis	0	0	3		Parabacteroides_johnsonii	4	4	4
Clostridium_baratii	0	0	1		Campylobacter_showae	0	2	1		Parabacteroides_merdae	4	4	4
Enterococcus_casseliflavus	0	0	1		Catenibacterium_mitsuokai	0	0	5		Paraprevotella_clara	4	4	4
Enterococcus_gallinarum	0	0	1		Citrobacter_braakii	2	6	7		Paraprevotella_clara_CAG_116	4	4	4
Fusobacterium_gonidiaformans	0	0	1		Citrobacter_europaeus	0	0	6		Paraprevotella_xylaniphila	4	4	4
Klebsiella_oxytoca	0	0	1		Citrobacter_freundii	1	7	7		Prevotella_copri	4	4	4
Kluyvera_ascorbata	0	0	1		Citrobacter_portucalensis	2	7	6		Prevotella_sp_CAG_279	4	4	4
Kluyvera_georgiana	0	0	1		Citrobacter_werkmanii	0	0	4		Prevotella_stercorea	4	4	4
Leclercia_adecarboxylata	0	0	1		Citrobacter_youngae	2	6	5		Prevotella_stercorea_CAG_629	4	4	4
Leptotrichia_wadei	0	0	1		Clostridiales_bacterium_1_7_47FAA	0	7	0		Parabacteroides_gordonii	3	4	4
Raoultella_planticola	0	0	1		Clostridioides_difficile	0	7	0		Lactobacillus_oris	0	1	4
Streptococcus_sp_oral_taxon_058	0	0	1		Clostridium_aldenense	0	7	6		Shewanella_algae	0	0	4
Streptococcus_sp_A12	4	5	0		Clostridium_asparagiforme	0	4	4		Enterococcus_faecalis	0	5	3
Streptococcus_sp_HMSC034E03	0	5	0		Clostridium_baratii	0	0	5		Bacteroides_uniformis_CAG_3	3	3	3
Streptococcus_viridans	0	4	0		Clostridium_bolteae	0	7	7		Parasutterella_excrementihominis	3	3	3
Streptococcus_thermophilus	3	3	0		Clostridium_butyricum	0	7	0		Prevotella_copri_CAG_164	3	3	3
Streptococcus_thermophilus_CAG_236	3	3	0		Clostridium_celatum	0	2	5		Prevotella_sp_CAG_520	3	3	3
Streptococcus_infantarius	1	3	0		Clostridium_citroniae	0	5	5		Proteobacteria_bacterium_CAG_139	3	3	3
Streptococcus_lutetiensis	0	3	0		Clostridium_clostridioforme	0	7	7		Prevotella_sp_CAG_5226	3	0	3
Weissella_confusa	0	3	0		Clostridium_disporicum	2	7	7		Lactobacillus_reuteri	0	0	3
Staphylococcus_capitis	1	2	0		Clostridium_innocuum	0	7	7		Lactobacillus_vaginalis	0	0	3
Lactococcus_lactis	0	2	0		Clostridium_lavalense	0	5	3		Enterococcus_casseliflavus	0	0	3
Fusobacterium_ulcerans	1	1	0		Clostridium_paraputrificum	0	4	0		Enterococcus_gallinarum	0	0	3
Lawsonibacter_asaccharolyticus	1	1	0		Clostridium_perfringens	0	7	7		Bacteroides_sp_CAG_530	0	0	3
Pyramidobacter_piscolens	1	1	0		Clostridium_sp_7_2_43FAA	0	6	0		Prevotella_histicola	0	3	2
Pyramidobacter_sp_C12_8	1	1	0		Clostridium_sp_CAG_242	0	2	1		Prevotella_oris	0	3	2
Acidaminococcus_sp_CAG_542	0	1	0		Clostridium_sp_CAG_253	0	7	7		Lactobacillus_salivarius	2	2	2
Clostridioides_difficile	0	1	0		Clostridium_symbiosum	0	7	7		Flavonifractor_plautii	2	2	2
Clostridium_butyricum	0	1	0		Clostridium_ventriculi	0	6	0		Butyricimonas_virosa	2	2	2
Clostridium_sp_7_2_43FAA	0	1	0		Comamonas_kerstersii	1	7	3		Ruminococcus_torques	2	2	2
Clostridium_ventriculi	0	1	0		Coprobacillus_cateniformis	0	7	0		Alistipes_finegoldii	2	2	2
Enterobacter_mori	0	1	0		Coprobacter_fastidiosus	0	7	6		Alistipes_onderdonkii	2	2	2
Klebsiella_aerogenes	0	1	0		Coprobacter_secundus	0	4	3		Alistipes_putredinis	2	2	2
Morganella_morganii	0	1	0		Coprococcus_catus	1	2	3		Alistipes_putredinis_CAG_67	2	2	2
Lactobacillus_ruminis	4	0	0		Coprococcus_comes	0	7	5		Bacteroides_clarus	2	2	2
Lactobacillus_ruminis_CAG_367	4	0	0		Coprococcus_comes_CAG_19	0	6	4		Bilophila_wadsworthia	2	2	2
Staphylococcus_aureus	2	0	0		Coprococcus_eutactus	1	7	7		Alloprevotella_tannerae	0	2	2
Blastocystis_sp_subtype_1	1	0	0		Coprococcus_eutactus_CAG_665	0	2	1		Prevotella_jejuni	0	2	2
Enterococcus_faecium	1	0	0		Desulfovibrio_piger	0	6	6		Coprobacter_secundus	3	1	2
Faecalitalea_cylindroides	1	0	0		Dialister_invisus	0	6	5		Lactobacillus_crispatus	0	1	2
Firmicutes_bacterium_CAG_238	1	0	0		Dialister_invisus_CAG_218	0	6	5		Klebsiella_michiganensis	7	0	2
Roseburia_sp_CAG_182	1	0	0		Dialister_pneumosintes	0	7	7		Bacteroides_sp_OM05_12	2	0	2
Sanguibacteroides_justesenii	1	0	0		Dialister_sp_CAG_357	0	6	0		Enterobacter_bugandensis	0	0	2
Staphylococcus_sciuri	1	0	0		Dielma_fastidiosa	0	7	7		Haemophilus_sputorum	1	7	1
					Dorea_formicigenerans	0	7	7		Veillonella_denticariosi	0	6	1
					Dorea_formicigenerans_CAG_28	0	7	7		Actinomyces_sp_oral_taxon_181	0	5	1
					Dorea_longicatena	1	7	7		Eggerthella_lenta	1	3	1
					Dorea_longicatena_CAG_42	1	7	7		Eisenbergiella_tayi	1	3	1
					Eggerthella_lenta	0	2	0		Streptococcus_infantis	0	3	1
					Eisenbergiella_tayi	0	7	0		Streptococcus_mitis	0	2	1
					Enterobacter_bugandensis	0	0	2		Comamonas_kerstersii	1	1	1
					Enterobacter_cloacae_complex	2	8	7		Eubacterium_rectale	1	1	1
					Enterobacter_mori	0	7	5		Hungatella_hathewayi	1	1	1
					Enterococcus_casseliflavus	0	0	1		Intestinimonas_butyriciproducens	1	1	1
					Enterococcus_faecalis	0	3	3		Megasphaera_elsdenii	1	1	1
					Enterococcus_faecium	2	1	1		Roseburia_faecis	1	1	1
					Enterococcus_gallinarum	0	0	1		Bifidobacterium_pseudocatenulatum	1	1	1
					Erysipelatoclostridium_ramosum	0	7	7		Blautia_wexlerae	1	1	1
					Escherichia_coli	2	8	8		Desulfovibrio_piger	1	1	1
					Eubacterium_eligens	1	7	7		Dorea_longicatena	1	1	1
					Eubacterium_eligens_CAG_72	1	7	7		Streptococcus_oralis	0	1	1
					Eubacterium_hallii	2	7	7		Clostridium_disporicum	0	1	1
					Eubacterium_hallii_CAG_12	2	7	7		Fusobacterium_nucleatum	0	1	1
					Eubacterium_ramulus	3	5	5		Fusobacterium_periodonticum	0	1	1
					Eubacterium_rectale	1	7	7		Bifidobacterium_dentium	0	1	1
					Eubacterium_siraeum	1	7	5		Campylobacter_concisus	0	1	1
					Eubacterium_sp_CAG_180	0	7	7		Campylobacter_gracilis	0	1	1
					Eubacterium_sp_CAG_251	0	7	7		Clostridium_citroniae	0	1	1
					Eubacterium_sp_CAG_274	0	7	7		Clostridium_clostridioforme	0	1	1
					Eubacterium_sp_CAG_38	0	7	7		Clostridium_symbiosum	0	1	1
					Eubacterium_sp_OM08_24	0	0	7		Neisseria_flavescens	0	1	1
					Eubacterium_ventriosum	0	7	7		Lactobacillus_paragasseri	0	0	1
					Faecalibacterium_prausnitzii	2	6	6		Lactobacillus_gasseri	0	0	1
					Faecalicoccus_pleomorphus	0	1	0		Fusobacterium_gonidiaformans	0	0	1
					Faecalitalea_cylindroides	1	0	0		Bifidobacterium_breve	0	0	1
					Firmicutes_bacterium_CAG_110	0	1	0		Campylobacter_showae	0	0	1
					Firmicutes_bacterium_CAG_238	1	0	0		Helicobacter_equorum	0	0	1
					Firmicutes_bacterium_CAG_83	0	7	7		Neisseria_subflava	0	0	1
					Firmicutes_bacterium_CAG_95	0	7	1		Klebsiella_aerogenes	2	9	0
					Flavonifractor_plautii	3	7	7		Lactococcus_lactis	0	7	0
					Fusicatenibacter_saccharivorans	1	7	7		Weissella_confusa	0	7	0
					Fusobacterium_gonidiaformans	0	0	3		Bacteroides_coprophilus	6	6	0
					Fusobacterium_hwasookii	0	5	5		Bacteroides_coprophilus_CAG_333	6	6	0
					Fusobacterium_mortiferum	1	7	7		Morganella_morganii	0	6	0
					Fusobacterium_nucleatum	0	8	8		Coprobacter_fastidiosus	4	4	0
					Fusobacterium_periodonticum	0	7	7		Prevotella_sp_AM42_24	4	4	0
					Fusobacterium_sp_oral_taxon_370	0	5	7		Prevotella_sp_CAG_1031	4	4	0
					Fusobacterium_ulcerans	1	7	7		Lactobacillus_rhamnosus	0	4	0
					Fusobacterium_varium	0	3	7		Veillonella_rodentium	0	4	0
					Gemmiger_formicilis	1	7	7		Actinomyces_sp_HPA0247	0	3	0
					Gemmiger_sp_An194	0	0	6		Aggregatibacter_aphrophilus	0	3	0
					Gemmiger_sp_An87	0	0	6		Proteus_hauseri	0	3	0
					Haemophilus_haemolyticus	0	0	6		Proteus_vulgaris	0	3	0
					Haemophilus_influenzae	0	0	2		Veillonella_sp_CAG_933	0	3	0
					Haemophilus_parahaemolyticus	0	7	6		Bacteroides_faecis	5	2	0
					Haemophilus_parainfluenzae	1	7	7		Bifidobacterium_longum	2	2	0
					Haemophilus_paraphrohaemolyticus	0	1	7		Staphylococcus_capitis	1	2	0
					Haemophilus_quentini	0	2	6		Prevotella_salivae	0	2	0
					Haemophilus_sp_HMSC71H05	0	6	6		Streptococcus_sp_HMSC034E03	0	2	0
					Haemophilus_sputorum	0	6	1		Sanguibacteroides_justesenii	2	1	0
					Helicobacter_equorum	0	0	7		Anaerotruncus_colihominis	1	1	0
					Holdemanella_biformis	0	7	7		Bifidobacterium_longum_CAG_69	1	1	0
					Holdemania_filiformis	0	7	1		Dialister_sp_CAG_357	1	1	0
					Hungatella_hathewayi	0	7	7		Bifidobacterium_bifidum	0	1	0
					Intestinibacter_bartlettii	0	7	7		Bifidobacterium_bifidum_CAG_234	0	1	0
					Intestinimonas_butyriciproducens	1	7	7		Enterococcus_thailandicus	0	1	0
					Klebsiella_aerogenes	0	7	0		Lactobacillus_plantarum	0	1	0
					Klebsiella_michiganensis	2	0	6		Neisseria_mucosa	0	1	0
					Klebsiella_oxytoca	0	0	8		Parvimonas_sp_KA00067	0	1	0
					Klebsiella_pneumoniae	3	8	8		Providencia_alcalifaciens	0	1	0
					Klebsiella_quasipneumoniae	2	7	7		Rothia_dentocariosa	0	1	0
					Klebsiella_variicola	2	6	7		Rothia_mucilaginosa	0	1	0
					Klebsiella_variicola_CAG_634	1	6	6		Turicibacter_sanguinis	0	1	0
					Kluyvera_ascorbata	0	3	6		Weissella_cibaria	0	1	0
					Kluyvera_cryocrescens	0	0	3		Bacteroides_sartorii	5	0	0
					Kluyvera_georgiana	0	0	6		Staphylococcus_aureus	5	0	0
					Lachnospira_pectinoschiza	0	7	7		Bacteroides_fluxus	4	0	0
					Lachnospiraceae_bacterium_2_1_46FAA	0	7	6		Bacteroides_oleiciplenus	3	0	0
					Lachnospiraceae_bacterium_oral_taxon_096	0	1	7		Prevotella_sp_CAG_891	3	0	0
					Lactobacillus_crispatus	0	0	1		Alistipes_indistinctus	2	0	0
					Lactobacillus_fermentum	0	2	2		Atlantibacter_hermannii	2	0	0
					Lactobacillus_gasseri	0	0	1		Barnesiella_sp_An22	2	0	0
					Lactobacillus_mucosae	0	2	2		Catenibacterium_mitsuokai	2	0	0
					Lactobacillus_oris	0	0	2		Desulfovibrionaceae_bacterium	2	0	0
					Lactobacillus_paragasseri	0	1	1		Parabacteroides_chinchillae	2	0	0
					Lactobacillus_reuteri	0	0	2		Bifidobacterium_adolescentis	1	0	0
					Lactobacillus_ruminis	4	0	0		Bifidobacterium_animalis	1	0	0
					Lactobacillus_ruminis_CAG_367	4	0	0		Cloacibacillus_porcorum	1	0	0
					Lactobacillus_salivarius	5	2	2		Lautropia_mirabilis	1	0	0
					Lactobacillus_vaginalis	0	0	2		Staphylococcus_hominis	1	0	0
					Lactococcus_lactis	0	1	0		Staphylococcus_sciuri	1	0	0
					Lautropia_mirabilis	0	2	0
					Lawsonibacter_asaccharolyticus	1	2	0
					Leclercia_adecarboxylata	0	0	4
					Leptotrichia_wadei	0	1	1
					Megamonas_funiformis	0	7	7
					Megamonas_funiformis_CAG_377	0	3	3
					Megamonas_hypermegale	0	7	7
					Megasphaera_elsdenii	1	5	4
					Megasphaera_micronuciformis	0	6	6
					Methanobrevibacter_smithii	1	0	0
					Methanobrevibacter_smithii_CAG_186	1	0	0
					Mitsuokella_multacida	0	6	0
					Mogibacterium_diversum	0	7	1
					Morganella_morganii	0	6	1
					Neisseria_flavescens	0	6	1
					Neisseria_mucosa	0	6	0
					Neisseria_sicca	0	6	1
					Neisseria_subflava	0	1	1
					Oscillibacter_sp_CAG_241	0	7	5
					Oxalobacter_formigenes	0	0	6
					Paeniclostridium_sordellii	0	0	2
					Parabacteroides_distasonis	0	7	7
					Parabacteroides_goldsteinii	0	7	7
					Parabacteroides_gordonii	0	7	7
					Parabacteroides_johnsonii	0	7	7
					Parabacteroides_merdae	0	7	7
					Paraclostridium_bifermentans	0	1	0
					Paraprevotella_clara	0	6	7
					Paraprevotella_clara_CAG_116	0	7	7
					Paraprevotella_xylaniphila	0	5	7
					Parasutterella_excrementihominis	0	7	7
					Parvimonas_micra	0	6	0
					Parvimonas_sp_KA00067	0	4	0
					Parvimonas_sp_oral_taxon_393	0	1	0
					Peptostreptococcus_stomatis	0	7	0
					Phascolarctobacterium_faecium	0	7	7
					Phascolarctobacterium_sp_CAG_266	0	6	0
					Phascolarctobacterium_succinatutens	0	7	0
					Prevotella_bivia	0	1	0
					Prevotella_buccae	0	7	7
					Prevotella_copri	0	6	6
					Prevotella_copri_CAG_164	0	6	6
					Prevotella_denticola	0	7	6
					Prevotella_histicola	0	7	6
					Prevotella_intermedia	0	1	7
					Prevotella_jejuni	0	7	6
					Prevotella_melaninogenica	0	7	7
					Prevotella_multiformis	0	7	7
					Prevotella_nigrescens	0	3	4
					Prevotella_oris	0	5	7
					Prevotella_pallens	0	5	7
					Prevotella_salivae	0	5	0
					Prevotella_scopos	0	0	4
					Prevotella_sp_AM42_24	0	6	0
					Prevotella_sp_CAG_1031	0	6	0
					Prevotella_sp_CAG_1185	0	4	4
					Prevotella_sp_CAG_279	0	7	7
					Prevotella_sp_CAG_520	0	5	5
					Prevotella_sp_CAG_5226	0	0	6
					Prevotella_sp_F0091	0	5	7
					Prevotella_sp_oral_taxon_306	0	4	6
					Prevotella_stercorea	0	5	5
					Prevotella_stercorea_CAG_629	0	5	5
					Prevotella_timonensis	0	1	0
					Prevotella_veroralis	0	3	7
					Proteobacteria_bacterium_CAG_139	0	7	7
					Proteus_hauseri	0	3	0
					Proteus_vulgaris	0	3	0
					Providencia_alcalifaciens	0	1	0
					Pyramidobacter_piscolens	2	3	2
					Pyramidobacter_sp_C12_8	2	2	0
					Raoultella_ornithinolytica	0	5	7
					Raoultella_planticola	0	0	5
					Robinsoniella_sp_RHS	0	1	0
					Romboutsia_ilealis	1	7	0
					Romboutsia_lituseburensis	0	2	0
					Roseburia_faecis	2	7	7
					Roseburia_hominis	1	7	7
					Roseburia_intestinalis	2	7	7
					Roseburia_intestinalis_CAG_13	2	7	7
					Roseburia_inulinivorans	1	7	7
					Roseburia_inulinivorans_CAG_15	1	7	7
					Roseburia_sp_CAG_182	1	0	0
					Roseburia_sp_CAG_303	0	7	0
					Roseburia_sp_CAG_471	0	6	0
					Rothia_dentocariosa	0	1	0
					Rothia_mucilaginosa	0	2	0
					Ruminococcaceae_bacterium_D16	0	0	1
					Ruminococcus_bicirculans	0	7	7
					Ruminococcus_bromii	0	7	7
					Ruminococcus_callidus	0	7	6
					Ruminococcus_gnavus	0	7	7
					Ruminococcus_lactaris	0	7	7
					Ruminococcus_sp_CAG_403	0	7	6
					Ruminococcus_sp_CAG_488	0	1	0
					Ruminococcus_torques	2	7	7
					Ruthenibacterium_lactatiformans	0	7	7
					Sanguibacteroides_justesenii	1	0	0
					Selenomonas_sputigena	0	0	2
					Shewanella_algae	0	0	5
					Staphylococcus_aureus	2	0	0
					Staphylococcus_capitis	1	0	0
					Staphylococcus_sciuri	1	0	0
					Streptococcus_australis	5	0	0
					Streptococcus_cristatus	0	0	1
					Streptococcus_downei	0	0	1
					Streptococcus_infantarius	1	2	0
					Streptococcus_lutetiensis	0	2	1
					Streptococcus_mitis	0	1	1
					Streptococcus_mutans	0	1	1
					Streptococcus_oralis	0	1	1
					Streptococcus_parasanguinis	3	0	0
					Streptococcus_pasteurianus	2	2	2
					Streptococcus_salivarius	3	0	0
					Streptococcus_salivarius_CAG_79	2	0	0
					Streptococcus_sp_A12	5	0	0
					Streptococcus_thermophilus	3	0	0
					Streptococcus_thermophilus_CAG_236	3	0	0
					Turicibacter_sanguinis	0	7	3
					Tyzzerella_nexilis	0	7	7
					Veillonella_atypica	0	7	7
					Veillonella_denticariosi	0	6	3
					Veillonella_dispar	2	7	7
					Veillonella_infantium	0	5	5
					Veillonella_parvula	2	7	7
					Veillonella_rodentium	0	3	0
					Veillonella_rogosae	0	6	6
					Veillonella_sp_CAG_933	0	7	0
					Veillonella_tobetsuensis	0	7	7
					Victivallis_vadensis	0	6	0
					Weissella_cibaria	0	1	0
					Weissella_confusa	0	1	0

## Sheet: Table S6
Table S6. Total number of unique EC numbers determined to have greater than zero relative abundance in respective pathway (mevalonate and MEP isoprenoid biosynthesis, and menaqui-none biosynthesis) in TCDD-exposed mice. Treatment groups for 0, 0.3, 3, and 30 µg/kg TCDD are denoted. EC numbers used for analysis are listed to the left of table header and represent de novo biosynthesis for respectiv…
EC 2.3.1.9, 2.3.3.10, 1.1.1.34, 1.1.1.88, 2.7.1.36, 2.7.4.2, 4.1.1.33	Mevalonate Isoprenoid Biosynthesis					EC 2.2.1.7, 1.1.1.267, 2.7.7.60, 2.7.1.148, 4.6.1.12, 1.17.7.1, 1.17.7.3, 1.17.7.4	MEP Isoprenoid biosynthesis					EC 5.4.4.2, 2.2.1.9, 4.2.99.20, 5.2.99.20, 4.2.1.113, 6.2.1.26, 4.1.3.36, 3.1.2.28, 2.5.1.74, 2.1.1.163	Menaquinone Biosynthesis
	Dose (µg/kg TCDD)						Dose (µg/kg TCDD)						Dose (µg/kg TCDD)
species	0	0.3	3	30		species	0	0.3	3	30		species	0	0.3	3	30
Lactobacillus_reuteri	1	5	6	6		Anaerotruncus_sp_G3_2012	7	7	7	7		Bacteroides_vulgatus	5	6	6	6
Lactobacillus_johnsonii	0	2	4	5		Bacteroides_caecimuris	7	7	7	7		Bacteroides_caecimuris	5	5	5	5
Eubacterium_plexicaudatum	1	1	1	1		Bacteroides_uniformis	7	7	7	7		Bacteroides_vulgatus_CAG_6	5	5	5	5
Lactobacillus_murinus	1	1	1	1		Bacteroides_uniformis_CAG_3	7	7	7	7		Escherichia_coli	0	0	4	5
Escherichia_coli	0	0	1	1		Bifidobacterium_pseudolongum	7	7	7	7		Parabacteroides_distasonis	5	5	5	4
Lactobacillus_intestinalis	0	0	0	1		Clostridium_sp_ASF356	7	7	7	7		Muribaculum_intestinale	4	4	4	4
						Dorea_sp_5_2	7	7	7	7		Lactobacillus_reuteri	0	3	4	4
						Lachnospiraceae_bacterium_28_4	7	7	7	7		Prevotella_sp_MGM1	3	3	3	3
						Lachnospiraceae_bacterium_A2	7	7	7	7		Parasutterella_excrementihominis	0	2	3	3
						Lachnospiraceae_bacterium_A4	7	7	7	7		Akkermansia_muciniphila	4	4	4	2
						Lachnospiraceae_bacterium_M18_1	7	7	7	7		Lactobacillus_murinus	2	2	2	2
						Mucispirillum_schaedleri	7	7	7	7		Bacteroides_thetaiotaomicron	2	2	4	1
						Muribaculum_intestinale	7	7	7	7		Bacteroides_uniformis	1	1	1	1
						Parabacteroides_distasonis	7	7	7	7		Bacteroides_uniformis_CAG_3	1	1	1	1
						Prevotella_sp_MGM1	7	7	7	7		Bifidobacterium_pseudolongum	1	1	1	1
						Firmicutes_bacterium_ASF500	6	7	7	7		Mucispirillum_schaedleri	1	1	1	1
						Parasutterella_excrementihominis	0	7	7	7		Lactobacillus_johnsonii	0	1	1	1
						Clostridium_sp_ASF502	7	6	7	7		Acetatifactor_muris	1	0	1	1
						Lachnospiraceae_bacterium_COE1	7	6	7	7		Lactobacillus_intestinalis	0	0	1	1
						Faecalibaculum_rodentium	7	4	7	7		Bacteroides_intestinalis	1	3	4	0
						Acetatifactor_muris	3	3	6	7		Bacteroides_ovatus	0	0	4	0
						Lachnospiraceae_bacterium_10_1	7	7	7	6		Parabacteroides_goldsteinii	2	1	3	0
						Eubacterium_plexicaudatum	2	7	7	6
						Bacteroides_vulgatus	7	7	6	6
						Bacteroides_vulgatus_CAG_6	7	7	6	6
						Romboutsia_ilealis	0	0	0	6
						Lachnospiraceae_bacterium_3_2	6	7	7	5
						Escherichia_coli	0	0	4	5
						Oscillibacter_sp_1_3	7	6	7	3
						Bacteroides_thetaiotaomicron	4	6	7	2
						Acutalibacter_muris	7	3	7	2
						Parabacteroides_goldsteinii	6	7	6	2
						Lactobacillus_reuteri	0	2	2	2
						Akkermansia_muciniphila	5	5	5	1
						Lactobacillus_murinus	1	1	1	1
						Lactobacillus_johnsonii	0	1	1	1
						Lactobacillus_intestinalis	0	0	1	1
						Lachnospiraceae_bacterium_3_1	1	1	0	1
						Staphylococcus_lentus	0	0	0	1
						Eubacterium_sp_14_2	0	0	7	0
						Bacteroides_ovatus	0	0	6	0
						Bacteroides_intestinalis	0	1	4	0

## Sheet: Table S7
Table S7. Mean relative abundance denoted in counts per million (CPM) of EC annotations classified to L. reuteri and associated with chorismate biosynthesis.
ecID	dose (µg/kg TCDD)	species	Mean CPM	sd	adj. p
1.1.1.25	0	Lactobacillus_reuteri	0	0	0.320226
1.1.1.25	0.3	Lactobacillus_reuteri	0.0574577	0.0995196	0.320226
1.1.1.25	3	Lactobacillus_reuteri	0.0141963	0.0245888	0.320226
1.1.1.25	30	Lactobacillus_reuteri	0.208325	0.20918	0.320226
2.5.1.19	0	Lactobacillus_reuteri	0	0	0.425496
2.5.1.19	0.3	Lactobacillus_reuteri	0.049999	0.0866008	0.425496
2.5.1.19	3	Lactobacillus_reuteri	0	0	0.425496
2.5.1.19	30	Lactobacillus_reuteri	0.21394	0.18585	0.425496
2.7.1.71	0	Lactobacillus_reuteri	0	0	0.76334
2.7.1.71	0.3	Lactobacillus_reuteri	0.0219713	0.0380555	0.76334
2.7.1.71	3	Lactobacillus_reuteri	0.056009	0.0630562	0.76334
2.7.1.71	30	Lactobacillus_reuteri	0.27755	0.252827	0.76334
4.2.1.10	0	Lactobacillus_reuteri	0	0	0.788011
4.2.1.10	0.3	Lactobacillus_reuteri	0.017133	0.0296752	0.788011
4.2.1.10	3	Lactobacillus_reuteri	0	0	0.788011
4.2.1.10	30	Lactobacillus_reuteri	0.22991	0.217547	0.788011
4.2.3.5	0	Lactobacillus_reuteri	0	0	0.535401
4.2.3.5	0.3	Lactobacillus_reuteri	0.015234	0.0263861	0.535401
4.2.3.5	3	Lactobacillus_reuteri	0	0	0.535401
4.2.3.5	30	Lactobacillus_reuteri	0.284714	0.248794	0.535401

## Sheet: Table S8
Table S8. EC numbers with realtive species abundance for the menaquinone biosynthesis pathway in fecal samples from cirrhotic patients. Diagnosis groups are defined as healthy, compensated, and decompensated. Mean relative species abundance for EC number (copies per million reads, CPM), n=3) are denoted in respective columns. Adjusted p-values (adj. p) were determined by the Maaslin2 R package an…
EC #	Group	genus	species	mean CPM	sd	adj. p
2.1.1.163	compensated	Prevotella	Prevotella_sp_CAG_1031	0.00397321	0.0275272	0.411765
2.1.1.163	compensated	Bacteroides	Bacteroides_coprocola_CAG_162	0.231089	1.33091	0.411765
2.1.1.163	compensated	Bacteroides	Bacteroides_coprophilus	0.561726	1.78621	0.411765
2.1.1.163	compensated	Weissella	Weissella_cibaria	0.00118196	0.00818885	0.411765
2.1.1.163	compensated	Weissella	Weissella_confusa	0.0064876	0.0449474	0.411765
2.1.1.163	compensated	Lactobacillus	Lactobacillus_johnsonii	0	0	0.411765
2.1.1.163	compensated	Bacteroides	Bacteroides_coprocola	0.158245	0.669733	0.411765
2.1.1.163	compensated	Veillonella	Veillonella_atypica	1.95773	3.55247	0.411765
2.1.1.163	compensated	Veillonella	Veillonella_denticariosi	0.00508023	0.0351969	0.411765
2.1.1.163	compensated	Veillonella	Veillonella_dispar	0.91564	1.78344	0.411765
2.1.1.163	compensated	Bilophila	Bilophila_wadsworthia	0.216891	0.588581	0.411765
2.1.1.163	compensated	Blautia	Blautia_wexlerae	0.539851	2.13676	0.411765
2.1.1.163	compensated	Veillonella	Veillonella_parvula	2.55655	4.91714	0.411765
2.1.1.163	compensated	Veillonella	Veillonella_rogosae	0.117041	0.472636	0.411765
2.1.1.163	compensated	Veillonella	Veillonella_sp_CAG_933	0.0425771	0.294983	0.411765
2.1.1.163	compensated	Kluyvera	Kluyvera_georgiana	0	0	0.411765
2.1.1.163	compensated	Lactobacillus	Lactobacillus_crispatus	0.00258923	0.0179387	0.411765
2.1.1.163	compensated	Lactobacillus	Lactobacillus_fermentum	0.207144	0.731816	0.411765
2.1.1.163	compensated	Aeromonas	Aeromonas_caviae	0	0	0.411765
2.1.1.163	compensated	Aeromonas	Aeromonas_veronii	0	0	0.411765
2.1.1.163	compensated	Akkermansia	Akkermansia_muciniphila	0.0464719	0.293235	0.411765
2.1.1.163	compensated	Alistipes	Alistipes_finegoldii	0.141266	0.472947	0.411765
2.1.1.163	compensated	Prevotella	Prevotella_sp_CAG_5226	0	0	0.411765
2.1.1.163	compensated	Prevotella	Prevotella_sp_CAG_617	0	0	0.411765
2.1.1.163	compensated	Prevotella	Prevotella_sp_CAG_891	0	0	0.411765
2.1.1.163	compensated	Prevotella	Prevotella_sp_F0091	0.00445994	0.0308994	0.411765
2.1.1.163	compensated	Bacteroides	Bacteroides_fluxus	0	0	0.411765
2.1.1.163	compensated	Bacteroides	Bacteroides_fragilis	2.83025	4.57575	0.411765
2.1.1.163	compensated	Prevotella	Prevotella_stercorea	0.147899	0.676262	0.411765
2.1.1.163	compensated	Prevotella	Prevotella_stercorea_CAG_629	0.0436242	0.187994	0.411765
2.1.1.163	compensated	Streptococcus	Streptococcus_mitis	0.0151618	0.105044	0.411765
2.1.1.163	compensated	Streptococcus	Streptococcus_oralis	0.00232871	0.0161338	0.411765
2.1.1.163	compensated	Streptococcus	Streptococcus_sp_HMSC034E03	0.000533125	0.0036936	0.411765
2.1.1.163	compensated	unclassified	Unclassified	5.03715	5.66204	0.411765
2.1.1.163	compensated	Raoultella	Raoultella_ornithinolytica	0.00267792	0.0185532	0.411765
2.1.1.163	compensated	Raoultella	Raoultella_planticola	0	0	0.411765
2.1.1.163	compensated	Roseburia	Roseburia_faecis	1.14899	2.71007	0.411765
2.1.1.163	compensated	Rothia	Rothia_mucilaginosa	0.00621129	0.0430331	0.411765
2.1.1.163	compensated	Blautia	Ruminococcus_torques	0.146934	0.574205	0.411765
2.1.1.163	compensated	Shewanella	Shewanella_algae	0	0	0.411765
2.1.1.163	compensated	Staphylococcus	Staphylococcus_aureus	0	0	0.411765
2.1.1.163	compensated	Staphylococcus	Staphylococcus_capitis	0.00920213	0.0637542	0.411765
2.1.1.163	compensated	Veillonella	Veillonella_tobetsuensis	0.565674	2.83113	0.411765
2.1.1.163	compensated	Helicobacter	Helicobacter_equorum	0	0	0.411765
2.1.1.163	compensated	Intestinimonas	Intestinimonas_butyriciproducens	0.1669	0.475076	0.411765
2.1.1.163	compensated	Klebsiella	Klebsiella_aerogenes	0.0537283	0.333707	0.411765
2.1.1.163	compensated	Klebsiella	Klebsiella_michiganensis	0	0	0.411765
2.1.1.163	compensated	Klebsiella	Klebsiella_oxytoca	0	0	0.411765
2.1.1.163	compensated	Klebsiella	Klebsiella_pneumoniae	1.71711	6.68369	0.411765
2.1.1.163	compensated	Klebsiella	Klebsiella_quasipneumoniae	0.00657048	0.0202451	0.411765
2.1.1.163	compensated	Klebsiella	Klebsiella_variicola	0.00232913	0.00942518	0.411765
2.1.1.163	compensated	Klebsiella	Klebsiella_variicola_CAG_634	0.00236529	0.00962683	0.411765
2.1.1.163	compensated	Kluyvera	Kluyvera_ascorbata	0.00224785	0.0155736	0.411765
2.1.1.163	compensated	Campylobacter	Campylobacter_gracilis	0.00520246	0.0360437	0.411765
2.1.1.163	compensated	Campylobacter	Campylobacter_showae	0	0	0.411765
2.1.1.163	compensated	Catenibacterium	Catenibacterium_mitsuokai	0	0	0.411765
2.1.1.163	compensated	Citrobacter	Citrobacter_braakii	0.00763396	0.0370067	0.411765
2.1.1.163	compensated	Citrobacter	Citrobacter_europaeus	0	0	0.411765
2.1.1.163	compensated	Citrobacter	Citrobacter_freundii	0.019377	0.113552	0.411765
2.1.1.163	compensated	Lactobacillus	Lactobacillus_oris	0	0	0.411765
2.1.1.163	compensated	Lactobacillus	Lactobacillus_paragasseri	0	0	0.411765
2.1.1.163	compensated	Prevotella	Prevotella_sp_CAG_279	0.102917	0.427888	0.411765
2.1.1.163	compensated	Prevotella	Prevotella_sp_CAG_520	0.424267	2.09356	0.411765
2.1.1.163	compensated	Lactobacillus	Lactobacillus_vaginalis	0	0	0.411765
2.1.1.163	compensated	Lactococcus	Lactococcus_lactis	0.00658638	0.0456317	0.411765
2.1.1.163	compensated	Lautropia	Lautropia_mirabilis	0	0	0.411765
2.1.1.163	compensated	Leclercia	Leclercia_adecarboxylata	0	0	0.411765
2.1.1.163	compensated	Leuconostoc	Leuconostoc_garlicum	0	0	0.411765
2.1.1.163	compensated	Megasphaera	Megasphaera_elsdenii	0.725191	4.70753	0.411765
2.1.1.163	compensated	Bacteroides	Bacteroides_fragilis_CAG_47	1.49383	6.09059	0.411765
2.1.1.163	compensated	Prevotella	Prevotella_veroralis	0.00479325	0.0332086	0.411765
2.1.1.163	compensated	Proteobacteria_unclassified	Proteobacteria_bacterium_CAG_139	0.207571	0.569049	0.411765
2.1.1.163	compensated	Proteus	Proteus_vulgaris	0.00389852	0.0270097	0.411765
2.1.1.163	compensated	Providencia	Providencia_alcalifaciens	0.00333625	0.0231142	0.411765
2.1.1.163	compensated	Pseudoflavonifractor	Pseudoflavonifractor_sp_An184	0	0	0.411765
2.1.1.163	compensated	Parabacteroides	Parabacteroides_goldsteinii	0.0469948	0.229309	0.411765
2.1.1.163	compensated	Parabacteroides	Parabacteroides_gordonii	0.0370592	0.256753	0.411765
2.1.1.163	compensated	Parabacteroides	Parabacteroides_johnsonii	0.000600562	0.00416082	0.411765
2.1.1.163	compensated	Actinomyces	Actinomyces_odontolyticus	0	0	0.411765
2.1.1.163	compensated	Actinomyces	Actinomyces_sp_HMSC035G02	0	0	0.411765
2.1.1.163	compensated	Actinomyces	Actinomyces_sp_HPA0247	0.00858035	0.0594464	0.411765
2.1.1.163	compensated	Actinomyces	Actinomyces_sp_oral_taxon_181	0.0324306	0.193728	0.411765
2.1.1.163	compensated	Aeromonas	Aeromonas_allosaccharophila	0	0	0.411765
2.1.1.163	compensated	Streptococcus	Streptococcus_infantis	0.00158356	0.0109712	0.411765
2.1.1.163	compensated	Parasutterella	Parasutterella_excrementihominis	0.534344	1.22224	0.411765
2.1.1.163	compensated	Parvimonas	Parvimonas_sp_KA00067	0.0107112	0.0742096	0.411765
2.1.1.163	compensated	Prevotella	Prevotella_buccae	0.992194	4.17336	0.411765
2.1.1.163	compensated	Prevotella	Prevotella_copri	20.8703	35.6153	0.411765
2.1.1.163	compensated	Prevotella	Prevotella_copri_CAG_164	5.31777	11.0061	0.411765
2.1.1.163	compensated	Prevotella	Prevotella_denticola	0.0735568	0.428233	0.411765
2.1.1.163	compensated	Prevotella	Prevotella_histicola	0.00655842	0.045438	0.411765
2.1.1.163	compensated	Prevotella	Prevotella_intermedia	0	0	0.411765
2.1.1.163	compensated	Prevotella	Prevotella_jejuni	0.0031366	0.021731	0.411765
2.1.1.163	compensated	Prevotella	Prevotella_melaninogenica	0.00968779	0.0492049	0.411765
2.1.1.163	compensated	Prevotella	Prevotella_multiformis	0.0176273	0.122126	0.411765
2.1.1.163	compensated	Prevotella	Prevotella_nigrescens	0	0	0.411765
2.1.1.163	compensated	Prevotella	Prevotella_oris	0.00544694	0.0377375	0.411765
2.1.1.163	compensated	Prevotella	Prevotella_pallens	0	0	0.411765
2.1.1.163	compensated	Prevotella	Prevotella_salivae	0	0	0.411765
2.1.1.163	compensated	Prevotella	Prevotella_sp_AM42_24	0.596417	2.60477	0.411765
2.1.1.163	compensated	Paraprevotella	Paraprevotella_clara	0.0190206	0.0947019	0.411765
2.1.1.163	compensated	Parabacteroides	Parabacteroides_merdae	0.910032	2.37059	0.411765
2.1.1.163	compensated	Lachnoclostridium	Clostridium_citroniae	0.00566046	0.02744	0.411765
2.1.1.163	compensated	Bacteroides	Bacteroides_dorei	5.75069	17.3173	0.411765
2.1.1.163	compensated	Bacteroides	Bacteroides_eggerthii	0.105645	0.498328	0.411765
2.1.1.163	compensated	Enterobacter	Enterobacter_mori	0.00335081	0.0232151	0.411765
2.1.1.163	compensated	Parabacteroides	Parabacteroides_sp_CAG_409	0	0	0.411765
2.1.1.163	compensated	Bacteroides	Bacteroides_finegoldii	0.639129	1.22487	0.411765
2.1.1.163	compensated	Paraprevotella	Paraprevotella_clara_CAG_116	0.0129475	0.0528496	0.411765
2.1.1.163	compensated	Bacteroides	Bacteroides_faecichinchillae	0	0	0.411765
2.1.1.163	compensated	Desulfovibrionaceae_unclassified	Desulfovibrionaceae_bacterium	0	0	0.411765
2.1.1.163	compensated	Dorea	Dorea_longicatena	0.0215539	0.0811544	0.411765
2.1.1.163	compensated	Eisenbergiella	Eisenbergiella_tayi	0.240806	0.742999	0.411765
2.1.1.163	compensated	Enterobacter	Enterobacter_cloacae_complex	0.0197228	0.0970737	0.411765
2.1.1.163	compensated	Citrobacter	Citrobacter_youngae	0.00221725	0.0153616	0.411765
2.1.1.163	compensated	Bacteroides	Bacteroides_ovatus	1.77356	2.79316	0.411765
2.1.1.163	compensated	Bacteroides	Bacteroides_plebeius	2.91797	5.37442	0.411765
2.1.1.163	compensated	Bacteroides	Bacteroides_plebeius_CAG_211	6.08358	13.1583	0.411765
2.1.1.163	compensated	Bacteroides	Bacteroides_salyersiae	0.136856	0.432573	0.411765
2.1.1.163	compensated	Bacteroides	Bacteroides_faecis	0.00586123	0.0406078	0.411765
2.1.1.163	compensated	Bacteroides	Bacteroides_sp_43_108	0	0	0.411765
2.1.1.163	compensated	Bacteroides	Bacteroides_sp_CAG_530	0	0	0.411765
2.1.1.163	compensated	Paraprevotella	Paraprevotella_xylaniphila	0.00927919	0.0411704	0.411765
2.1.1.163	compensated	Desulfovibrio	Desulfovibrio_piger	0.0146012	0.10116	0.411765
2.1.1.163	compensated	Bacteroides	Bacteroides_intestinalis	0.129895	0.368356	0.411765
2.1.1.163	compensated	Bacteroides	Bacteroides_massiliensis	1.19993	5.05565	0.411765
2.1.1.163	compensated	Bacteroides	Bacteroides_nordii	0.0604038	0.224	0.411765
2.1.1.163	compensated	Bacteroides	Bacteroides_oleiciplenus	0	0	0.411765
2.1.1.163	compensated	Bacteroides	Bacteroides_vulgatus	6.19464	8.37562	0.411765
2.1.1.163	compensated	Bacteroides	Bacteroides_vulgatus_CAG_6	6.45583	9.65934	0.411765
2.1.1.163	compensated	Bacteroides	Bacteroides_xylanisolvens	1.39003	2.80118	0.411765
2.1.1.163	compensated	Barnesiella	Barnesiella_intestinihominis	0.134161	0.401249	0.411765
2.1.1.163	compensated	Bacteroides	Bacteroides_sartorii	0	0	0.411765
2.1.1.163	compensated	Butyricimonas	Butyricimonas_virosa	0.150455	0.611055	0.411765
2.1.1.163	compensated	Campylobacter	Campylobacter_concisus	0.0221951	0.0888294	0.411765
2.1.1.163	compensated	Bacteroides	Bacteroides_sp_D2	0	0	0.411765
2.1.1.163	compensated	Bacteroides	Bacteroides_sp_OM05_12	0	0	0.411765
2.1.1.163	compensated	Bacteroides	Bacteroides_stercoris	5.1352	8.91746	0.411765
2.1.1.163	compensated	Bacteroides	Bacteroides_thetaiotaomicron	2.47118	4.49585	0.411765
2.1.1.163	compensated	Bacteroides	Bacteroides_uniformis	5.20267	8.28538	0.411765
2.1.1.163	compensated	Bacteroides	Bacteroides_uniformis_CAG_3	1.98878	6.34325	0.411765
2.1.1.163	compensated	Citrobacter	Citrobacter_portucalensis	0.0224499	0.0986161	0.411765
2.1.1.163	compensated	Citrobacter	Citrobacter_werkmanii	0	0	0.411765
2.1.1.163	compensated	Bacteroides	Bacteroides_coprophilus_CAG_333	0.475784	1.67748	0.411765
2.1.1.163	compensated	Alistipes	Alistipes_onderdonkii	0.0835758	0.57903	0.411765
2.1.1.163	compensated	Alistipes	Alistipes_putredinis	0.877964	1.51202	0.411765
2.1.1.163	compensated	Alistipes	Alistipes_putredinis_CAG_67	0.691605	1.12048	0.411765
2.1.1.163	compensated	Alloprevotella	Alloprevotella_tannerae	0.0221733	0.153621	0.411765
2.1.1.163	compensated	Prevotella	Prevotella_sp_oral_taxon_306	0.00359804	0.0200428	0.411765
2.1.1.163	compensated	Anaeromassilibacillus	Anaeromassilibacillus_sp_An250	0	0	0.411765
2.1.1.163	compensated	Anaerotruncus	Anaerotruncus_colihominis	0.0504961	0.294921	0.411765
2.1.1.163	compensated	Atlantibacter	Atlantibacter_hermannii	0	0	0.411765
2.1.1.163	compensated	Lactobacillus	Lactobacillus_gasseri	0	0	0.411765
2.1.1.163	compensated	Bacteroides	Bacteroides_clarus	0.320455	1.31602	0.411765
2.1.1.163	compensated	Bacteroides	Bacteroides_cellulosilyticus	0.521899	2.56526	0.411765
2.1.1.163	compensated	Alistipes	Alistipes_indistinctus	0	0	0.411765
2.1.1.163	compensated	Kluyvera	Kluyvera_cryocrescens	0	0	0.411765
2.1.1.163	compensated	Veillonella	Veillonella_infantium	1.26591	2.43194	0.411765
2.1.1.163	compensated	Bacteroides	Bacteroides_caccae	1.14339	2.1478	0.411765
2.1.1.163	compensated	Lachnospiraceae_unclassified	Eubacterium_rectale	0.351924	1.63736	0.411765
2.1.1.163	compensated	Flavonifractor	Flavonifractor_plautii	0.298669	0.676168	0.411765
2.1.1.163	compensated	Fusobacterium	Fusobacterium_gonidiaformans	0	0	0.411765
2.1.1.163	compensated	Fusobacterium	Fusobacterium_nucleatum	0.0598893	0.306043	0.411765
2.1.1.163	compensated	Fusobacterium	Fusobacterium_periodonticum	0.0223932	0.100254	0.411765
2.1.1.163	compensated	Fusobacterium	Fusobacterium_sp_CAG_439	0	0	0.411765
2.1.1.163	compensated	Corynebacterium	Corynebacterium_matruchotii	0	0	0.411765
2.1.1.163	compensated	Morganella	Morganella_morganii	0.00379846	0.0263165	0.411765
2.1.1.163	compensated	Neisseria	Neisseria_flavescens	0.00738556	0.0511687	0.411765
2.1.1.163	compensated	Neisseria	Neisseria_mucosa	0.00830135	0.0575135	0.411765
2.1.1.163	compensated	Neisseria	Neisseria_subflava	0	0	0.411765
2.1.1.163	compensated	Oxalobacter	Oxalobacter_formigenes	0	0	0.411765
2.1.1.163	compensated	Lactobacillus	Lactobacillus_reuteri	0	0	0.411765
2.1.1.163	compensated	Lactobacillus	Lactobacillus_rhamnosus	0.005504	0.0381328	0.411765
2.1.1.163	compensated	Lachnoclostridium	Clostridium_clostridioforme	0.0117359	0.0813087	0.411765
2.1.1.163	compensated	Clostridium	Clostridium_disporicum	0.0773537	0.362161	0.411765
2.1.1.163	compensated	Comamonas	Comamonas_kerstersii	0.0201235	0.103042	0.411765
2.1.1.163	compensated	Coprobacter	Coprobacter_fastidiosus	0.0537313	0.372261	0.411765
2.1.1.163	compensated	Coprobacter	Coprobacter_secundus	0	0	0.411765
2.1.1.163	compensated	Escherichia	Escherichia_coli	1.60729	3.62231	0.411765
2.1.1.163	compensated	Parabacteroides	Parabacteroides_distasonis	1.71839	2.65823	0.411765
2.1.1.163	compensated	Enterococcus	Enterococcus_gallinarum	0	0	0.411765
2.2.1.9	compensated	Bacteroides	Bacteroides_finegoldii	0.702927	1.5021	0.373673
2.2.1.9	compensated	Prevotella	Prevotella_copri	16.2981	27.0223	0.373673
2.2.1.9	compensated	Prevotella	Prevotella_copri_CAG_164	12.1673	20.624	0.373673
2.2.1.9	compensated	Haemophilus	Haemophilus_sp_HMSC71H05	0.0632839	0.206422	0.373673
2.2.1.9	compensated	Prevotella	Prevotella_histicola	0.013515	0.0666506	0.373673
2.2.1.9	compensated	Hungatella	Hungatella_hathewayi	0.132606	0.519195	0.373673
2.2.1.9	compensated	Bacteroides	Bacteroides_faecis	0	0	0.373673
2.2.1.9	compensated	Aeromonas	Aeromonas_media	0	0	0.373673
2.2.1.9	compensated	Prevotella	Prevotella_salivae	0.00393429	0.0272576	0.373673
2.2.1.9	compensated	Prevotella	Prevotella_sp_AM42_24	0.91332	3.88164	0.373673
2.2.1.9	compensated	Prevotella	Prevotella_sp_CAG_1031	0.00906677	0.0628164	0.373673
2.2.1.9	compensated	Prevotella	Prevotella_sp_CAG_279	0.0567121	0.295512	0.373673
2.2.1.9	compensated	Prevotella	Prevotella_denticola	0.0698731	0.39093	0.373673
2.2.1.9	compensated	Prevotella	Prevotella_sp_F0091	0.00408644	0.0283117	0.373673
2.2.1.9	compensated	Prevotella	Prevotella_sp_oral_taxon_306	0.00162133	0.0112329	0.373673
2.2.1.9	compensated	Klebsiella	Klebsiella_aerogenes	0.0545034	0.361571	0.373673
2.2.1.9	compensated	Bacteroides	Bacteroides_coprophilus_CAG_333	0.67954	2.61047	0.373673
2.2.1.9	compensated	Bacteroides	Bacteroides_dorei	3.71743	9.81119	0.373673
2.2.1.9	compensated	Bacteroides	Bacteroides_eggerthii	0.0793505	0.346532	0.373673
2.2.1.9	compensated	Raoultella	Raoultella_planticola	0	0	0.373673
2.2.1.9	compensated	Sanguibacteroides	Sanguibacteroides_justesenii	0	0	0.373673
2.2.1.9	compensated	Aeromonas	Aeromonas_caviae	0	0	0.373673
2.2.1.9	compensated	Citrobacter	Citrobacter_freundii	0.00738592	0.0385675	0.373673
2.2.1.9	compensated	Citrobacter	Citrobacter_koseri	0	0	0.373673
2.2.1.9	compensated	Aggregatibacter	Aggregatibacter_aphrophilus	0.0012621	0.00874411	0.373673
2.2.1.9	compensated	Aggregatibacter	Aggregatibacter_segnis	0.0165393	0.0570313	0.373673
2.2.1.9	compensated	Aggregatibacter	Aggregatibacter_sp_oral_taxon_458	0.00826146	0.0331755	0.373673
2.2.1.9	compensated	Akkermansia	Akkermansia_muciniphila	0.0786599	0.350933	0.373673
2.2.1.9	compensated	Bacteroides	Bacteroides_caccae	1.05044	1.90048	0.373673
2.2.1.9	compensated	Bacteroides	Bacteroides_cellulosilyticus	0.398114	2.54411	0.373673
2.2.1.9	compensated	Bacteroides	Bacteroides_coprocola	0.158509	0.783799	0.373673
2.2.1.9	compensated	Bacteroides	Bacteroides_coprocola_CAG_162	0.147642	0.669072	0.373673
2.2.1.9	compensated	Enterobacter	Enterobacter_cloacae_complex	0.0200638	0.097493	0.373673
2.2.1.9	compensated	Enterobacter	Enterobacter_mori	0.00466098	0.0322922	0.373673
2.2.1.9	compensated	Enterococcus	Enterococcus_faecalis	0.0178456	0.123638	0.373673
2.2.1.9	compensated	Enterococcus	Enterococcus_gallinarum	0	0	0.373673
2.2.1.9	compensated	Escherichia	Escherichia_coli	0.754646	1.85453	0.373673
2.2.1.9	compensated	Bacteroides	Bacteroides_fluxus	0	0	0.373673
2.2.1.9	compensated	Bacteroides	Bacteroides_fragilis	1.59864	3.4776	0.373673
2.2.1.9	compensated	Bacteroides	Bacteroides_fragilis_CAG_47	1.27009	3.80349	0.373673
2.2.1.9	compensated	Bacteroides	Bacteroides_intestinalis	0.0310762	0.215303	0.373673
2.2.1.9	compensated	Bacteroides	Bacteroides_massiliensis	1.30473	4.91565	0.373673
2.2.1.9	compensated	Bacteroides	Bacteroides_nordii	0.0409847	0.20353	0.373673
2.2.1.9	compensated	Bacteroides	Bacteroides_coprophilus	0.406074	1.26955	0.373673
2.2.1.9	compensated	Prevotella	Prevotella_multiformis	0.00793519	0.0549766	0.373673
2.2.1.9	compensated	Prevotella	Prevotella_nigrescens	0.00474498	0.0328742	0.373673
2.2.1.9	compensated	Prevotella	Prevotella_oris	0	0	0.373673
2.2.1.9	compensated	Prevotella	Prevotella_pallens	0	0	0.373673
2.2.1.9	compensated	Staphylococcus	Staphylococcus_aureus	0	0	0.373673
2.2.1.9	compensated	unclassified	Unclassified	3.81852	5.65155	0.373673
2.2.1.9	compensated	Veillonella	Veillonella_atypica	1.45453	2.84069	0.373673
2.2.1.9	compensated	Veillonella	Veillonella_denticariosi	0.00380617	0.0263699	0.373673
2.2.1.9	compensated	Prevotella	Prevotella_sp_CAG_617	0	0	0.373673
2.2.1.9	compensated	Veillonella	Veillonella_infantium	0.36701	0.860713	0.373673
2.2.1.9	compensated	Veillonella	Veillonella_parvula	2.20369	3.71415	0.373673
2.2.1.9	compensated	Prevotella	Prevotella_stercorea	0.0813244	0.298888	0.373673
2.2.1.9	compensated	Prevotella	Prevotella_stercorea_CAG_629	0.132061	0.507238	0.373673
2.2.1.9	compensated	Prevotella	Prevotella_veroralis	0.00486406	0.0336992	0.373673
2.2.1.9	compensated	Raoultella	Raoultella_ornithinolytica	0.000450062	0.00311812	0.373673
2.2.1.9	compensated	Weissella	Weissella_confusa	0.00494444	0.0342561	0.373673
2.2.1.9	compensated	Aeromonas	Aeromonas_allosaccharophila	0	0	0.373673
2.2.1.9	compensated	Citrobacter	Citrobacter_europaeus	0	0	0.373673
2.2.1.9	compensated	Paraprevotella	Paraprevotella_xylaniphila	0.00991944	0.0490794	0.373673
2.2.1.9	compensated	Plesiomonas	Plesiomonas_shigelloides	0	0	0.373673
2.2.1.9	compensated	Citrobacter	Citrobacter_portucalensis	0.00639173	0.0316109	0.373673
2.2.1.9	compensated	Citrobacter	Citrobacter_werkmanii	0	0	0.373673
2.2.1.9	compensated	Citrobacter	Citrobacter_youngae	0.00204635	0.0100062	0.373673
2.2.1.9	compensated	Coprobacter	Coprobacter_fastidiosus	0.0496837	0.344219	0.373673
2.2.1.9	compensated	Coprobacter	Coprobacter_secundus	0	0	0.373673
2.2.1.9	compensated	Eggerthella	Eggerthella_lenta	0.00391215	0.0271041	0.373673
2.2.1.9	compensated	Eisenbergiella	Eisenbergiella_tayi	0.0588425	0.251064	0.373673
2.2.1.9	compensated	Enterobacter	Enterobacter_bugandensis	0	0	0.373673
2.2.1.9	compensated	Prevotella	Prevotella_melaninogenica	0.00617352	0.0427714	0.373673
2.2.1.9	compensated	Klebsiella	Klebsiella_pneumoniae	1.61185	8.14375	0.373673
2.2.1.9	compensated	Klebsiella	Klebsiella_quasipneumoniae	0.00346298	0.0161195	0.373673
2.2.1.9	compensated	Klebsiella	Klebsiella_variicola	0.0112057	0.0403605	0.373673
2.2.1.9	compensated	Kluyvera	Kluyvera_ascorbata	0	0	0.373673
2.2.1.9	compensated	Haemophilus	Haemophilus_haemolyticus	0	0	0.373673
2.2.1.9	compensated	Haemophilus	Haemophilus_parahaemolyticus	0.0942028	0.433284	0.373673
2.2.1.9	compensated	Leclercia	Leclercia_adecarboxylata	0	0	0.373673
2.2.1.9	compensated	Morganella	Morganella_morganii	0.00191775	0.0132866	0.373673
2.2.1.9	compensated	Parabacteroides	Parabacteroides_distasonis	1.46852	2.45328	0.373673
2.2.1.9	compensated	Parabacteroides	Parabacteroides_goldsteinii	0.0102509	0.07102	0.373673
2.2.1.9	compensated	Bacteroides	Bacteroides_oleiciplenus	0	0	0.373673
2.2.1.9	compensated	Bacteroides	Bacteroides_ovatus	2.50325	3.9364	0.373673
2.2.1.9	compensated	Bacteroides	Bacteroides_plebeius	3.84324	7.34297	0.373673
2.2.1.9	compensated	Bacteroides	Bacteroides_plebeius_CAG_211	3.96564	9.32263	0.373673
2.2.1.9	compensated	Bacteroides	Bacteroides_salyersiae	0.119188	0.394239	0.373673
2.2.1.9	compensated	Bacteroides	Bacteroides_sartorii	0	0	0.373673
2.2.1.9	compensated	Bacteroides	Bacteroides_sp_D2	0	0	0.373673
2.2.1.9	compensated	Bacteroides	Bacteroides_stercoris	3.6325	6.11205	0.373673
2.2.1.9	compensated	Bacteroides	Bacteroides_thetaiotaomicron	2.33873	4.18622	0.373673
2.2.1.9	compensated	Bacteroides	Bacteroides_uniformis	0.550455	1.53093	0.373673
2.2.1.9	compensated	Bacteroides	Bacteroides_uniformis_CAG_3	0.508265	1.49524	0.373673
2.2.1.9	compensated	Bacteroides	Bacteroides_vulgatus	7.94731	11.233	0.373673
2.2.1.9	compensated	Veillonella	Veillonella_rodentium	0.000210417	0.00145781	0.373673
2.2.1.9	compensated	Veillonella	Veillonella_rogosae	0.0296219	0.156927	0.373673
2.2.1.9	compensated	Veillonella	Veillonella_sp_CAG_933	0.0343704	0.238125	0.373673
2.2.1.9	compensated	Veillonella	Veillonella_tobetsuensis	0.537777	2.71797	0.373673
2.2.1.9	compensated	Haemophilus	Haemophilus_parainfluenzae	1.35238	2.58485	0.373673
2.2.1.9	compensated	Haemophilus	Haemophilus_sputorum	0.0112646	0.0584787	0.373673
2.2.1.9	compensated	Haemophilus	Haemophilus_paraphrohaemolyticus	0.0036226	0.0250981	0.373673
2.2.1.9	compensated	Haemophilus	Haemophilus_quentini	0	0	0.373673
2.2.1.9	compensated	Aeromonas	Aeromonas_veronii	0	0	0.373673
2.2.1.9	compensated	Prevotella	Prevotella_buccae	0.991023	4.29548	0.373673
2.2.1.9	compensated	Bifidobacterium	Bifidobacterium_adolescentis	0	0	0.373673
2.2.1.9	compensated	Kluyvera	Kluyvera_cryocrescens	0	0	0.373673
2.2.1.9	compensated	Kluyvera	Kluyvera_georgiana	0	0	0.373673
2.2.1.9	compensated	Klebsiella	Klebsiella_michiganensis	0	0	0.373673
2.2.1.9	compensated	Prevotella	Prevotella_intermedia	0	0	0.373673
2.2.1.9	compensated	Veillonella	Veillonella_dispar	2.58373	5.47778	0.373673
2.2.1.9	compensated	Barnesiella	Barnesiella_intestinihominis	0.141262	0.433125	0.373673
2.2.1.9	compensated	Parabacteroides	Parabacteroides_gordonii	0.0273552	0.189522	0.373673
2.2.1.9	compensated	Parabacteroides	Parabacteroides_johnsonii	0.0019446	0.00964866	0.373673
2.2.1.9	compensated	Klebsiella	Klebsiella_oxytoca	0	0	0.373673
2.2.1.9	compensated	Parabacteroides	Parabacteroides_sp_CAG_409	0	0	0.373673
2.2.1.9	compensated	Paraprevotella	Paraprevotella_clara	0.00768004	0.0372318	0.373673
2.2.1.9	compensated	Paraprevotella	Paraprevotella_clara_CAG_116	0.00676887	0.0343467	0.373673
2.2.1.9	compensated	Citrobacter	Citrobacter_braakii	0.0013686	0.00698401	0.373673
2.2.1.9	compensated	Parabacteroides	Parabacteroides_merdae	0.857731	2.03541	0.373673
2.2.1.9	compensated	Prevotella	Prevotella_jejuni	0	0	0.373673
2.2.1.9	compensated	Bacteroides	Bacteroides_xylanisolvens	1.3121	2.36153	0.373673
2.2.1.9	compensated	Actinomyces	Actinomyces_sp_oral_taxon_181	0.0158297	0.109672	0.373673
2.2.1.9	compensated	Bacteroides	Bacteroides_vulgatus_CAG_6	5.08776	7.20859	0.373673
2.2.1.9	compensated	Actinomyces	Actinomyces_sp_oral_taxon_180	0	0	0.373673
2.2.1.9	compensated	Bifidobacterium	Bifidobacterium_longum	0.0379719	0.263077	0.373673
2.5.1.74	compensated	Haemophilus	Haemophilus_parahaemolyticus	0.0529488	0.244103	0.236582
2.5.1.74	compensated	Haemophilus	Haemophilus_influenzae	0	0	0.236582
2.5.1.74	compensated	Bacteroides	Bacteroides_cellulosilyticus	0.622681	3.59223	0.236582
2.5.1.74	compensated	Haemophilus	Haemophilus_parainfluenzae	1.74678	3.66406	0.236582
2.5.1.74	compensated	Alloprevotella	Alloprevotella_tannerae	0.0246411	0.147353	0.236582
2.5.1.74	compensated	Bacteroides	Bacteroides_caccae	1.09117	2.21814	0.236582
2.5.1.74	compensated	Parasutterella	Parasutterella_excrementihominis	0.371188	1.01838	0.236582
2.5.1.74	compensated	Alistipes	Alistipes_putredinis	1.056	1.79661	0.236582
2.5.1.74	compensated	Prevotella	Prevotella_copri	4.70024	13.2264	0.236582
2.5.1.74	compensated	Bacteroides	Bacteroides_fragilis_CAG_47	1.19927	3.05125	0.236582
2.5.1.74	compensated	Bacteroides	Bacteroides_finegoldii	0.705174	1.55671	0.236582
2.5.1.74	compensated	Prevotella	Prevotella_buccae	1.03808	4.36278	0.236582
2.5.1.74	compensated	Bacteroides	Bacteroides_clarus	0.415827	1.64243	0.236582
2.5.1.74	compensated	Bacteroides	Bacteroides_coprophilus_CAG_333	0.591083	2.22823	0.236582
2.5.1.74	compensated	Paraprevotella	Paraprevotella_xylaniphila	0.00438971	0.0304128	0.236582
2.5.1.74	compensated	Bacteroides	Bacteroides_faecichinchillae	0	0	0.236582
2.5.1.74	compensated	Bacteroides	Bacteroides_coprophilus	0.874605	2.6746	0.236582
2.5.1.74	compensated	Alistipes	Alistipes_putredinis_CAG_67	0.811499	1.38902	0.236582
2.5.1.74	compensated	Paraprevotella	Paraprevotella_clara_CAG_116	0.0103428	0.0554566	0.236582
2.5.1.74	compensated	Bacteroides	Bacteroides_eggerthii	0.0712071	0.361532	0.236582
2.5.1.74	compensated	Prevotella	Prevotella_oris	0.00715688	0.0495843	0.236582
2.5.1.74	compensated	Prevotella	Prevotella_pallens	0.00701758	0.0486192	0.236582
2.5.1.74	compensated	Prevotella	Prevotella_salivae	0	0	0.236582
2.5.1.74	compensated	Lactobacillus	Lactobacillus_crispatus	0	0	0.236582
2.5.1.74	compensated	Lactococcus	Lactococcus_lactis	0.00879777	0.0609527	0.236582
2.5.1.74	compensated	Leclercia	Leclercia_adecarboxylata	0	0	0.236582
2.5.1.74	compensated	Morganella	Morganella_morganii	0.0072369	0.0501387	0.236582
2.5.1.74	compensated	Aeromonas	Aeromonas_media	0	0	0.236582
2.5.1.74	compensated	Aeromonas	Aeromonas_veronii	0	0	0.236582
2.5.1.74	compensated	Aggregatibacter	Aggregatibacter_segnis	0.00369877	0.0182395	0.236582
2.5.1.74	compensated	Prevotella	Prevotella_sp_CAG_891	0	0	0.236582
2.5.1.74	compensated	Prevotella	Prevotella_sp_F0091	0.00418379	0.0289862	0.236582
2.5.1.74	compensated	Prevotella	Prevotella_sp_oral_taxon_306	0.00299225	0.0207309	0.236582
2.5.1.74	compensated	Prevotella	Prevotella_stercorea	0.0883817	0.383634	0.236582
2.5.1.74	compensated	Prevotella	Prevotella_stercorea_CAG_629	0.125299	0.434146	0.236582
2.5.1.74	compensated	Prevotella	Prevotella_veroralis	0.00360629	0.0249851	0.236582
2.5.1.74	compensated	Actinomyces	Actinomyces_sp_HPA0247	0.00745294	0.0516355	0.236582
2.5.1.74	compensated	Actinomyces	Actinomyces_sp_oral_taxon_181	0.023934	0.165819	0.236582
2.5.1.74	compensated	Aeromonas	Aeromonas_allosaccharophila	0	0	0.236582
2.5.1.74	compensated	Bacteroides	Bacteroides_faecis	0	0	0.236582
2.5.1.74	compensated	Veillonella	Veillonella_rodentium	0.00175369	0.0121499	0.236582
2.5.1.74	compensated	Weissella	Weissella_confusa	0.00670333	0.0464421	0.236582
2.5.1.74	compensated	Bifidobacterium	Bifidobacterium_bifidum_CAG_234	0.0234319	0.0955394	0.236582
2.5.1.74	compensated	Bacteroides	Bacteroides_fragilis	1.97752	4.86819	0.236582
2.5.1.74	compensated	Veillonella	Veillonella_denticariosi	0.00134025	0.00928552	0.236582
2.5.1.74	compensated	Bacteroides	Bacteroides_fluxus	0	0	0.236582
2.5.1.74	compensated	Parabacteroides	Parabacteroides_merdae	0.924695	2.34597	0.236582
2.5.1.74	compensated	Kluyvera	Kluyvera_ascorbata	0	0	0.236582
2.5.1.74	compensated	Kluyvera	Kluyvera_cryocrescens	0	0	0.236582
2.5.1.74	compensated	Kluyvera	Kluyvera_georgiana	0	0	0.236582
2.5.1.74	compensated	Haemophilus	Haemophilus_quentini	0	0	0.236582
2.5.1.74	compensated	Haemophilus	Haemophilus_sp_HMSC71H05	0.0766593	0.24785	0.236582
2.5.1.74	compensated	Haemophilus	Haemophilus_sputorum	0.00467902	0.0324172	0.236582
2.5.1.74	compensated	Klebsiella	Klebsiella_aerogenes	0.0824368	0.448823	0.236582
2.5.1.74	compensated	Prevotella	Prevotella_denticola	0.0681809	0.398302	0.236582
2.5.1.74	compensated	Prevotella	Prevotella_intermedia	0	0	0.236582
2.5.1.74	compensated	Prevotella	Prevotella_jejuni	0	0	0.236582
2.5.1.74	compensated	Prevotella	Prevotella_melaninogenica	0.000423083	0.00293121	0.236582
2.5.1.74	compensated	Prevotella	Prevotella_multiformis	0.00878783	0.0608839	0.236582
2.5.1.74	compensated	Prevotella	Prevotella_nigrescens	0.00289565	0.0200616	0.236582
2.5.1.74	compensated	Bacteroides	Bacteroides_salyersiae	0.194211	0.548887	0.236582
2.5.1.74	compensated	Bacteroides	Bacteroides_sartorii	0	0	0.236582
2.5.1.74	compensated	Bacteroides	Bacteroides_sp_43_108	0	0	0.236582
2.5.1.74	compensated	Bacteroides	Bacteroides_sp_CAG_530	0	0	0.236582
2.5.1.74	compensated	Bacteroides	Bacteroides_sp_D2	0	0	0.236582
2.5.1.74	compensated	Bacteroides	Bacteroides_sp_OM05_12	0	0	0.236582
2.5.1.74	compensated	Bacteroides	Bacteroides_stercoris	5.23061	9.13827	0.236582
2.5.1.74	compensated	Bacteroides	Bacteroides_thetaiotaomicron	1.39407	2.89367	0.236582
2.5.1.74	compensated	Bacteroides	Bacteroides_uniformis	4.12424	7.33932	0.236582
2.5.1.74	compensated	Bacteroides	Bacteroides_uniformis_CAG_3	6.6524	14.0669	0.236582
2.5.1.74	compensated	Bacteroides	Bacteroides_vulgatus	11.526	16.4815	0.236582
2.5.1.74	compensated	Aggregatibacter	Aggregatibacter_sp_oral_taxon_458	0.00440596	0.0218302	0.236582
2.5.1.74	compensated	Akkermansia	Akkermansia_muciniphila	0.0444623	0.214499	0.236582
2.5.1.74	compensated	Alistipes	Alistipes_finegoldii	0.360838	1.27804	0.236582
2.5.1.74	compensated	Alistipes	Alistipes_indistinctus	0	0	0.236582
2.5.1.74	compensated	Alistipes	Alistipes_onderdonkii	0.051509	0.356865	0.236582
2.5.1.74	compensated	Bifidobacterium	Bifidobacterium_bifidum	0.0123061	0.0514027	0.236582
2.5.1.74	compensated	Bifidobacterium	Bifidobacterium_breve	0	0	0.236582
2.5.1.74	compensated	Bifidobacterium	Bifidobacterium_dentium	0.102542	0.320465	0.236582
2.5.1.74	compensated	Aeromonas	Aeromonas_caviae	0	0	0.236582
2.5.1.74	compensated	Raoultella	Raoultella_planticola	0	0	0.236582
2.5.1.74	compensated	Rothia	Rothia_dentocariosa	0.00725629	0.0502731	0.236582
2.5.1.74	compensated	Staphylococcus	Staphylococcus_aureus	0	0	0.236582
2.5.1.74	compensated	Streptococcus	Streptococcus_infantis	0.0203588	0.113534	0.236582
2.5.1.74	compensated	Tannerella	Tannerella_forsythia	0	0	0.236582
2.5.1.74	compensated	Turicibacter	Turicibacter_sanguinis	0.0141822	0.0982569	0.236582
2.5.1.74	compensated	unclassified	Unclassified	5.09943	8.22633	0.236582
2.5.1.74	compensated	Parabacteroides	Parabacteroides_sp_CAG_409	0	0	0.236582
2.5.1.74	compensated	Paraprevotella	Paraprevotella_clara	0.0118157	0.074086	0.236582
2.5.1.74	compensated	Proteobacteria_unclassified	Proteobacteria_bacterium_CAG_139	0.195054	0.471322	0.236582
2.5.1.74	compensated	Proteus	Proteus_hauseri	0.00495575	0.0343344	0.236582
2.5.1.74	compensated	Proteus	Proteus_vulgaris	0.000903333	0.00625848	0.236582
2.5.1.74	compensated	Raoultella	Raoultella_ornithinolytica	0	0	0.236582
2.5.1.74	compensated	Bacteroides	Bacteroides_intestinalis	0.12216	0.373897	0.236582
2.5.1.74	compensated	Bacteroides	Bacteroides_massiliensis	1.39851	6.07104	0.236582
2.5.1.74	compensated	Bacteroides	Bacteroides_nordii	0.0563027	0.242052	0.236582
2.5.1.74	compensated	Bacteroides	Bacteroides_oleiciplenus	0	0	0.236582
2.5.1.74	compensated	Bacteroides	Bacteroides_ovatus	3.34079	4.97987	0.236582
2.5.1.74	compensated	Bacteroides	Bacteroides_plebeius	6.14747	12.7029	0.236582
2.5.1.74	compensated	Bacteroides	Bacteroides_plebeius_CAG_211	4.13643	9.40587	0.236582
2.5.1.74	compensated	Bacteroides	Bacteroides_xylanisolvens	0.683435	1.38717	0.236582
2.5.1.74	compensated	Bacteroides	Bacteroides_vulgatus_CAG_6	4.8772	7.07341	0.236582
2.5.1.74	compensated	Desulfovibrionaceae_unclassified	Desulfovibrionaceae_bacterium	0	0	0.236582
2.5.1.74	compensated	Bifidobacterium	Bifidobacterium_adolescentis	0	0	0.236582
2.5.1.74	compensated	Haemophilus	Haemophilus_haemolyticus	0	0	0.236582
2.5.1.74	compensated	Enterobacter	Enterobacter_cloacae_complex	0.0249166	0.120982	0.236582
2.5.1.74	compensated	Barnesiella	Barnesiella_intestinihominis	0.192729	0.5024	0.236582
2.5.1.74	compensated	Barnesiella	Barnesiella_sp_An22	0	0	0.236582
2.5.1.74	compensated	Prevotella	Prevotella_sp_CAG_279	0.0770877	0.452545	0.236582
2.5.1.74	compensated	Bifidobacterium	Bifidobacterium_animalis	0	0	0.236582
2.5.1.74	compensated	Klebsiella	Klebsiella_oxytoca	0	0	0.236582
2.5.1.74	compensated	Prevotella	Prevotella_sp_CAG_1031	0.0108618	0.075253	0.236582
2.5.1.74	compensated	Escherichia	Escherichia_coli	1.71131	3.7765	0.236582
2.5.1.74	compensated	Klebsiella	Klebsiella_michiganensis	0	0	0.236582
2.5.1.74	compensated	Klebsiella	Klebsiella_variicola_CAG_634	0.0387596	0.178702	0.236582
2.5.1.74	compensated	Enterobacter	Enterobacter_mori	0.00358871	0.0248633	0.236582
2.5.1.74	compensated	Prevotella	Prevotella_sp_AM42_24	0.932848	4.19843	0.236582
2.5.1.74	compensated	Klebsiella	Klebsiella_variicola	0.101571	0.500683	0.236582
2.5.1.74	compensated	Prevotella	Prevotella_sp_CAG_520	0.40919	1.98412	0.236582
2.5.1.74	compensated	Prevotella	Prevotella_sp_CAG_5226	0	0	0.236582
2.5.1.74	compensated	Prevotella	Prevotella_sp_CAG_617	0	0	0.236582
2.5.1.74	compensated	Haemophilus	Haemophilus_paraphrohaemolyticus	0	0	0.236582
2.5.1.74	compensated	Parabacteroides	Parabacteroides_chinchillae	0	0	0.236582
2.5.1.74	compensated	Parabacteroides	Parabacteroides_distasonis	1.60002	2.72058	0.236582
2.5.1.74	compensated	Klebsiella	Klebsiella_pneumoniae	1.58015	6.90178	0.236582
2.5.1.74	compensated	Klebsiella	Klebsiella_quasipneumoniae	0.0451649	0.179449	0.236582
2.5.1.74	compensated	Parabacteroides	Parabacteroides_johnsonii	0.00182173	0.0126213	0.236582
2.5.1.74	compensated	Citrobacter	Citrobacter_braakii	0.00349419	0.0192296	0.236582
2.5.1.74	compensated	Citrobacter	Citrobacter_europaeus	0	0	0.236582
2.5.1.74	compensated	Citrobacter	Citrobacter_freundii	0.0126403	0.0623441	0.236582
2.5.1.74	compensated	Citrobacter	Citrobacter_koseri	0	0	0.236582
2.5.1.74	compensated	Citrobacter	Citrobacter_portucalensis	0.0163621	0.0698089	0.236582
2.5.1.74	compensated	Citrobacter	Citrobacter_werkmanii	0	0	0.236582
2.5.1.74	compensated	Citrobacter	Citrobacter_youngae	0.00645685	0.0313955	0.236582
2.5.1.74	compensated	Coprobacter	Coprobacter_fastidiosus	0.0374735	0.259624	0.236582
2.5.1.74	compensated	Coprobacter	Coprobacter_secundus	0	0	0.236582
2.5.1.74	compensated	Corynebacterium	Corynebacterium_matruchotii	0	0	0.236582
2.5.1.74	compensated	Bacteroides	Bacteroides_coprocola	0.111674	0.443345	0.236582
2.5.1.74	compensated	Bacteroides	Bacteroides_coprocola_CAG_162	0.210277	1.14812	0.236582
2.5.1.74	compensated	Parabacteroides	Parabacteroides_goldsteinii	0.0241599	0.117604	0.236582
2.5.1.74	compensated	Parabacteroides	Parabacteroides_gordonii	0.0343329	0.237865	0.236582
2.5.1.74	compensated	Bacteroides	Bacteroides_dorei	4.80887	13.3349	0.236582
2.5.1.74	compensated	Bilophila	Bilophila_wadsworthia	0.168103	0.474115	0.236582
2.5.1.74	compensated	Bifidobacterium	Bifidobacterium_longum	0.145662	0.386595	0.236582
2.5.1.74	compensated	Bifidobacterium	Bifidobacterium_longum_CAG_69	0.1504	0.407688	0.236582
2.5.1.74	compensated	Bifidobacterium	Bifidobacterium_pseudocatenulatum	0.373704	1.21999	0.236582
2.5.1.74	compensated	Butyricimonas	Butyricimonas_virosa	0.166663	0.600922	0.236582
2.5.1.74	compensated	Campylobacter	Campylobacter_gracilis	0	0	0.236582
2.5.1.74	compensated	Catenibacterium	Catenibacterium_mitsuokai	0	0	0.236582
3.1.2.28	compensated	Bacteroides	Bacteroides_cellulosilyticus	0.165717	0.551919	0.167534
3.1.2.28	compensated	Citrobacter	Citrobacter_freundii	0.00690365	0.0351738	0.167534
3.1.2.28	compensated	Klebsiella	Klebsiella_quasipneumoniae	0.00143554	0.00994572	0.167534
3.1.2.28	compensated	Klebsiella	Klebsiella_variicola	0.00218385	0.0151302	0.167534
3.1.2.28	compensated	Citrobacter	Citrobacter_europaeus	0	0	0.167534
3.1.2.28	compensated	Eisenbergiella	Eisenbergiella_tayi	0.095054	0.289847	0.167534
3.1.2.28	compensated	Escherichia	Escherichia_coli	0.539769	1.23614	0.167534
3.1.2.28	compensated	Citrobacter	Citrobacter_portucalensis	0.006776	0.0346277	0.167534
3.1.2.28	compensated	Klebsiella	Klebsiella_aerogenes	0.0882965	0.570228	0.167534
3.1.2.28	compensated	Klebsiella	Klebsiella_oxytoca	0	0	0.167534
3.1.2.28	compensated	Enterobacter	Enterobacter_cloacae_complex	0.00960333	0.0665338	0.167534
3.1.2.28	compensated	Kluyvera	Kluyvera_cryocrescens	0	0	0.167534
3.1.2.28	compensated	Klebsiella	Klebsiella_variicola_CAG_634	0.00340402	0.0235837	0.167534
3.1.2.28	compensated	Kluyvera	Kluyvera_ascorbata	0	0	0.167534
3.1.2.28	compensated	Citrobacter	Citrobacter_youngae	0.00697127	0.033792	0.167534
3.1.2.28	compensated	Lactobacillus	Lactobacillus_fermentum	0.0192331	0.0968563	0.167534
3.1.2.28	compensated	Raoultella	Raoultella_ornithinolytica	0	0	0.167534
3.1.2.28	compensated	Bacteroides	Bacteroides_intestinalis	0.105473	0.341776	0.167534
3.1.2.28	compensated	Citrobacter	Citrobacter_braakii	0	0	0.167534
3.1.2.28	compensated	Klebsiella	Klebsiella_pneumoniae	0.534539	1.83223	0.167534
3.1.2.28	compensated	unclassified	Unclassified	0.0377871	0.172163	0.167534
3.1.2.28	compensated	Kluyvera	Kluyvera_georgiana	0	0	0.167534
3.1.2.28	compensated	Raoultella	Raoultella_planticola	0	0	0.167534
4.1.3.36	compensated	Veillonella	Veillonella_sp_CAG_933	0.0349442	0.2421	0.180525
4.1.3.36	compensated	Bacteroides	Bacteroides_ovatus	2.91548	4.23397	0.180525
4.1.3.36	compensated	Veillonella	Veillonella_rodentium	0.00189298	0.0131149	0.180525
4.1.3.36	compensated	Veillonella	Veillonella_rogosae	0.110579	0.474539	0.180525
4.1.3.36	compensated	Citrobacter	Citrobacter_portucalensis	0.0142651	0.0671765	0.180525
4.1.3.36	compensated	Citrobacter	Citrobacter_freundii	0.0107465	0.0601814	0.180525
4.1.3.36	compensated	Weissella	Weissella_cibaria	0	0	0.180525
4.1.3.36	compensated	Citrobacter	Citrobacter_youngae	0.00332031	0.0162991	0.180525
4.1.3.36	compensated	Cloacibacillus	Cloacibacillus_porcorum	0	0	0.180525
4.1.3.36	compensated	Veillonella	Veillonella_tobetsuensis	0.685267	2.63557	0.180525
4.1.3.36	compensated	Haemophilus	Haemophilus_haemolyticus	0	0	0.180525
4.1.3.36	compensated	Haemophilus	Haemophilus_influenzae	0	0	0.180525
4.1.3.36	compensated	Haemophilus	Haemophilus_parahaemolyticus	0.119951	0.555799	0.180525
4.1.3.36	compensated	Haemophilus	Haemophilus_parainfluenzae	1.40097	2.94412	0.180525
4.1.3.36	compensated	Coprobacter	Coprobacter_secundus	0.00468123	0.023508	0.180525
4.1.3.36	compensated	Eggerthella	Eggerthella_lenta	0.00324796	0.0225025	0.180525
4.1.3.36	compensated	Enterobacter	Enterobacter_cloacae_complex	0.0143016	0.0699259	0.180525
4.1.3.36	compensated	Enterobacter	Enterobacter_mori	0.00192144	0.0133121	0.180525
4.1.3.36	compensated	Enterococcus	Enterococcus_casseliflavus	0	0	0.180525
4.1.3.36	compensated	Klebsiella	Klebsiella_michiganensis	0	0	0.180525
4.1.3.36	compensated	Klebsiella	Klebsiella_oxytoca	0	0	0.180525
4.1.3.36	compensated	Bacteroides	Bacteroides_plebeius	7.00864	15.6428	0.180525
4.1.3.36	compensated	Bacteroides	Bacteroides_plebeius_CAG_211	1.91603	4.22636	0.180525
4.1.3.36	compensated	Bacteroides	Bacteroides_salyersiae	0.156985	0.454665	0.180525
4.1.3.36	compensated	Kluyvera	Kluyvera_ascorbata	0.00146146	0.0101253	0.180525
4.1.3.36	compensated	Kluyvera	Kluyvera_cryocrescens	0	0	0.180525
4.1.3.36	compensated	Bacteroides	Bacteroides_sp_D2	0	0	0.180525
4.1.3.36	compensated	Haemophilus	Haemophilus_paraphrohaemolyticus	0.00158148	0.00813611	0.180525
4.1.3.36	compensated	Bacteroides	Bacteroides_sartorii	0	0	0.180525
4.1.3.36	compensated	Bacteroides	Bacteroides_sp_CAG_530	0	0	0.180525
4.1.3.36	compensated	Weissella	Weissella_confusa	0.00741677	0.0360318	0.180525
4.1.3.36	compensated	Bacteroides	Bacteroides_fragilis	1.35235	3.58064	0.180525
4.1.3.36	compensated	Citrobacter	Citrobacter_europaeus	0	0	0.180525
4.1.3.36	compensated	Barnesiella	Barnesiella_sp_An22	0	0	0.180525
4.1.3.36	compensated	Citrobacter	Citrobacter_braakii	0.00472129	0.0228835	0.180525
4.1.3.36	compensated	Parabacteroides	Parabacteroides_chinchillae	0	0	0.180525
4.1.3.36	compensated	Parabacteroides	Parabacteroides_distasonis	1.4703	2.2482	0.180525
4.1.3.36	compensated	Parabacteroides	Parabacteroides_goldsteinii	0.028795	0.107809	0.180525
4.1.3.36	compensated	Parabacteroides	Parabacteroides_gordonii	0.0309323	0.214305	0.180525
4.1.3.36	compensated	Lachnoclostridium	Clostridium_symbiosum	0.0435534	0.174844	0.180525
4.1.3.36	compensated	Coprobacter	Coprobacter_fastidiosus	0.0623115	0.409868	0.180525
4.1.3.36	compensated	Haemophilus	Haemophilus_quentini	0.010943	0.0758155	0.180525
4.1.3.36	compensated	Bacteroides	Bacteroides_fragilis_CAG_47	0.966024	2.5198	0.180525
4.1.3.36	compensated	Bacteroides	Bacteroides_heparinolyticus	0	0	0.180525
4.1.3.36	compensated	Bacteroides	Bacteroides_massiliensis	1.33796	5.25192	0.180525
4.1.3.36	compensated	Bacteroides	Bacteroides_nordii	0.0637095	0.232896	0.180525
4.1.3.36	compensated	Enterococcus	Enterococcus_faecalis	0.0163184	0.113057	0.180525
4.1.3.36	compensated	Enterococcus	Enterococcus_gallinarum	0	0	0.180525
4.1.3.36	compensated	Escherichia	Escherichia_coli	0.54268	1.20835	0.180525
4.1.3.36	compensated	Flavonifractor	Flavonifractor_plautii	0.194848	0.52839	0.180525
4.1.3.36	compensated	Prevotella	Prevotella_histicola	0.0123086	0.0661293	0.180525
4.1.3.36	compensated	Prevotella	Prevotella_intermedia	0	0	0.180525
4.1.3.36	compensated	Prevotella	Prevotella_jejuni	0.00346281	0.0239911	0.180525
4.1.3.36	compensated	Prevotella	Prevotella_melaninogenica	0.00663087	0.0426177	0.180525
4.1.3.36	compensated	Prevotella	Prevotella_multiformis	0.00960967	0.0665777	0.180525
4.1.3.36	compensated	Bacteroides	Bacteroides_thetaiotaomicron	2.3387	3.81841	0.180525
4.1.3.36	compensated	Prevotella	Prevotella_oris	0	0	0.180525
4.1.3.36	compensated	Prevotella	Prevotella_oulorum	0	0	0.180525
4.1.3.36	compensated	Prevotella	Prevotella_pallens	0.00351635	0.0196527	0.180525
4.1.3.36	compensated	Prevotella	Prevotella_salivae	0.00384681	0.0193665	0.180525
4.1.3.36	compensated	Prevotella	Prevotella_sp_AM42_24	0.80765	3.33675	0.180525
4.1.3.36	compensated	Prevotella	Prevotella_sp_CAG_1031	0.0122523	0.0848862	0.180525
4.1.3.36	compensated	Prevotella	Prevotella_sp_CAG_279	0.070069	0.282443	0.180525
4.1.3.36	compensated	Prevotella	Prevotella_sp_CAG_520	0.412408	2.0736	0.180525
4.1.3.36	compensated	Prevotella	Prevotella_sp_CAG_5226	0	0	0.180525
4.1.3.36	compensated	Prevotella	Prevotella_sp_CAG_617	0	0	0.180525
4.1.3.36	compensated	Kluyvera	Kluyvera_georgiana	0	0	0.180525
4.1.3.36	compensated	Bacteroides	Bacteroides_stercoris	4.3902	7.54902	0.180525
4.1.3.36	compensated	Staphylococcus	Staphylococcus_hominis	0	0	0.180525
4.1.3.36	compensated	Bacteroides	Bacteroides_vulgatus	5.65886	7.42872	0.180525
4.1.3.36	compensated	Bacteroides	Bacteroides_vulgatus_CAG_6	7.59429	10.2278	0.180525
4.1.3.36	compensated	Bacteroides	Bacteroides_xylanisolvens	1.61574	2.53951	0.180525
4.1.3.36	compensated	Proteobacteria_unclassified	Proteobacteria_bacterium_CAG_139	0.189832	0.43942	0.180525
4.1.3.36	compensated	Proteus	Proteus_hauseri	0.000946312	0.00655625	0.180525
4.1.3.36	compensated	Proteus	Proteus_vulgaris	0.00194627	0.0134842	0.180525
4.1.3.36	compensated	Actinomyces	Actinomyces_sp_S6_Spd3	0	0	0.180525
4.1.3.36	compensated	Aeromonas	Aeromonas_allosaccharophila	0	0	0.180525
4.1.3.36	compensated	Aeromonas	Aeromonas_caviae	0	0	0.180525
4.1.3.36	compensated	Aeromonas	Aeromonas_veronii	0	0	0.180525
4.1.3.36	compensated	Staphylococcus	Staphylococcus_aureus	0	0	0.180525
4.1.3.36	compensated	Staphylococcus	Staphylococcus_capitis	0.00886004	0.0613842	0.180525
4.1.3.36	compensated	Bacteroides	Bacteroides_fluxus	0	0	0.180525
4.1.3.36	compensated	Staphylococcus	Staphylococcus_sciuri	0	0	0.180525
4.1.3.36	compensated	unclassified	Unclassified	2.46942	4.48684	0.180525
4.1.3.36	compensated	Veillonella	Veillonella_atypica	1.96528	3.562	0.180525
4.1.3.36	compensated	Veillonella	Veillonella_denticariosi	0.00239302	0.0165793	0.180525
4.1.3.36	compensated	Veillonella	Veillonella_dispar	1.29735	2.01107	0.180525
4.1.3.36	compensated	Veillonella	Veillonella_infantium	0.962515	1.7902	0.180525
4.1.3.36	compensated	Veillonella	Veillonella_parvula	2.31101	4.11887	0.180525
4.1.3.36	compensated	Bacteroides	Bacteroides_dorei	3.41376	8.44528	0.180525
4.1.3.36	compensated	Bacteroides	Bacteroides_eggerthii	0.0716625	0.315574	0.180525
4.1.3.36	compensated	Bacteroides	Bacteroides_faecichinchillae	0	0	0.180525
4.1.3.36	compensated	Bacteroides	Bacteroides_faecis	0.00814846	0.0409013	0.180525
4.1.3.36	compensated	Bacteroides	Bacteroides_finegoldii	0.717925	1.5943	0.180525
4.1.3.36	compensated	Prevotella	Prevotella_sp_CAG_891	0	0	0.180525
4.1.3.36	compensated	Lactobacillus	Lactobacillus_fermentum	0.263024	0.87765	0.180525
4.1.3.36	compensated	Lactobacillus	Lactobacillus_oris	0.000994896	0.00689284	0.180525
4.1.3.36	compensated	Lactobacillus	Lactobacillus_reuteri	0	0	0.180525
4.1.3.36	compensated	Lactobacillus	Lactobacillus_rhamnosus	0.0264032	0.127982	0.180525
4.1.3.36	compensated	Lactobacillus	Lactobacillus_salivarius	1.31861	3.56555	0.180525
4.1.3.36	compensated	Lactobacillus	Lactobacillus_vaginalis	0	0	0.180525
4.1.3.36	compensated	Lactococcus	Lactococcus_lactis	0.00478925	0.0331809	0.180525
4.1.3.36	compensated	Klebsiella	Klebsiella_pneumoniae	0.95839	3.53518	0.180525
4.1.3.36	compensated	Klebsiella	Klebsiella_quasipneumoniae	0.125397	0.599226	0.180525
4.1.3.36	compensated	Klebsiella	Klebsiella_variicola	0.0181296	0.0752624	0.180525
4.1.3.36	compensated	Klebsiella	Klebsiella_variicola_CAG_634	0.000665708	0.00461216	0.180525
4.1.3.36	compensated	Aggregatibacter	Aggregatibacter_aphrophilus	0.00402363	0.0278765	0.180525
4.1.3.36	compensated	Aggregatibacter	Aggregatibacter_segnis	0.0385631	0.0941016	0.180525
4.1.3.36	compensated	Aggregatibacter	Aggregatibacter_sp_oral_taxon_458	0.0149371	0.0568508	0.180525
4.1.3.36	compensated	Akkermansia	Akkermansia_muciniphila	0.0762605	0.263561	0.180525
4.1.3.36	compensated	Atlantibacter	Atlantibacter_hermannii	0	0	0.180525
4.1.3.36	compensated	Bacteroides	Bacteroides_caccae	1.19938	2.19963	0.180525
4.1.3.36	compensated	Bacteroides	Bacteroides_cellulosilyticus	0.522445	3.25681	0.180525
4.1.3.36	compensated	Bacteroides	Bacteroides_coprocola	0.123124	0.594181	0.180525
4.1.3.36	compensated	Bacteroides	Bacteroides_coprocola_CAG_162	0.177705	0.831142	0.180525
4.1.3.36	compensated	Bacteroides	Bacteroides_coprophilus	0.616877	2.05715	0.180525
4.1.3.36	compensated	Bacteroides	Bacteroides_coprophilus_CAG_333	0.449632	1.54947	0.180525
4.1.3.36	compensated	Prevotella	Prevotella_stercorea_CAG_629	0.0731248	0.274317	0.180525
4.1.3.36	compensated	Prevotella	Prevotella_sp_F0091	0.00434931	0.0301329	0.180525
4.1.3.36	compensated	Prevotella	Prevotella_sp_oral_taxon_306	0.000673104	0.0046634	0.180525
4.1.3.36	compensated	Prevotella	Prevotella_stercorea	0.0935553	0.365317	0.180525
4.1.3.36	compensated	Prevotella	Prevotella_veroralis	0.00205371	0.0142285	0.180525
4.1.3.36	compensated	Actinomyces	Actinomyces_naeslundii	0	0	0.180525
4.1.3.36	compensated	Actinomyces	Actinomyces_sp_oral_taxon_181	0.012005	0.0831731	0.180525
4.1.3.36	compensated	Paraprevotella	Paraprevotella_clara_CAG_116	0.0161915	0.0753282	0.180525
4.1.3.36	compensated	Paraprevotella	Paraprevotella_xylaniphila	0.0105113	0.0469381	0.180525
4.1.3.36	compensated	Parasutterella	Parasutterella_excrementihominis	0.564911	1.65901	0.180525
4.1.3.36	compensated	Prevotella	Prevotella_buccae	0.968396	4.36643	0.180525
4.1.3.36	compensated	Prevotella	Prevotella_copri	6.3597	16.9043	0.180525
4.1.3.36	compensated	Prevotella	Prevotella_copri_CAG_164	20.1902	33.2276	0.180525
4.1.3.36	compensated	Prevotella	Prevotella_denticola	0.0702644	0.405441	0.180525
4.1.3.36	compensated	Raoultella	Raoultella_planticola	0	0	0.180525
4.1.3.36	compensated	Sanguibacteroides	Sanguibacteroides_justesenii	0.00107458	0.00744493	0.180525
4.1.3.36	compensated	Shewanella	Shewanella_algae	0	0	0.180525
4.1.3.36	compensated	Parabacteroides	Parabacteroides_johnsonii	0.00237977	0.010916	0.180525
4.1.3.36	compensated	Parabacteroides	Parabacteroides_merdae	0.88662	2.24492	0.180525
4.1.3.36	compensated	Prevotella	Prevotella_nigrescens	0.00195227	0.0135257	0.180525
4.1.3.36	compensated	Haemophilus	Haemophilus_sp_HMSC71H05	0.0949696	0.310989	0.180525
4.1.3.36	compensated	Haemophilus	Haemophilus_sputorum	0.0941241	0.279718	0.180525
4.1.3.36	compensated	Klebsiella	Klebsiella_aerogenes	0.0618903	0.381998	0.180525
4.1.3.36	compensated	Barnesiella	Barnesiella_intestinihominis	0.161019	0.488779	0.180525
4.1.3.36	compensated	Leclercia	Leclercia_adecarboxylata	0	0	0.180525
4.1.3.36	compensated	Leuconostoc	Leuconostoc_garlicum	0	0	0.180525
4.1.3.36	compensated	Raoultella	Raoultella_ornithinolytica	0.000934292	0.00647296	0.180525
4.1.3.36	compensated	Parabacteroides	Parabacteroides_sp_CAG_409	0	0	0.180525
4.1.3.36	compensated	Paraprevotella	Paraprevotella_clara	0.011142	0.0520934	0.180525
4.2.1.113	compensated	Citrobacter	Citrobacter_braakii	0.000790375	0.00547588	0.107244
4.2.1.113	compensated	Citrobacter	Citrobacter_portucalensis	0.00747652	0.0373426	0.107244
4.2.1.113	compensated	Citrobacter	Citrobacter_werkmanii	0	0	0.107244
4.2.1.113	compensated	Citrobacter	Citrobacter_europaeus	0	0	0.107244
4.2.1.113	compensated	Citrobacter	Citrobacter_freundii	0.00418298	0.0262192	0.107244
4.2.1.113	compensated	Haemophilus	Haemophilus_sp_HMSC71H05	0.069191	0.252916	0.107244
4.2.1.113	compensated	Haemophilus	Haemophilus_sputorum	0.0139426	0.0734741	0.107244
4.2.1.113	compensated	Klebsiella	Klebsiella_aerogenes	0.0630194	0.42965	0.107244
4.2.1.113	compensated	Klebsiella	Klebsiella_oxytoca	0	0	0.107244
4.2.1.113	compensated	Klebsiella	Klebsiella_pneumoniae	1.68973	8.23353	0.107244
4.2.1.113	compensated	Klebsiella	Klebsiella_quasipneumoniae	0.0027269	0.0161428	0.107244
4.2.1.113	compensated	Enterococcus	Enterococcus_thailandicus	0.0045671	0.0316418	0.107244
4.2.1.113	compensated	Escherichia	Escherichia_coli	0.764795	1.51591	0.107244
4.2.1.113	compensated	Klebsiella	Klebsiella_variicola_CAG_634	0.00569317	0.0249907	0.107244
4.2.1.113	compensated	Kluyvera	Kluyvera_ascorbata	0	0	0.107244
4.2.1.113	compensated	Kluyvera	Kluyvera_cryocrescens	0	0	0.107244
4.2.1.113	compensated	Citrobacter	Citrobacter_youngae	0.000818354	0.00396634	0.107244
4.2.1.113	compensated	Dialister	Dialister_sp_CAG_357	0.0194008	0.103365	0.107244
4.2.1.113	compensated	Haemophilus	Haemophilus_parahaemolyticus	0.0661634	0.293477	0.107244
4.2.1.113	compensated	Haemophilus	Haemophilus_haemolyticus	0	0	0.107244
4.2.1.113	compensated	Haemophilus	Haemophilus_influenzae	0	0	0.107244
4.2.1.113	compensated	Haemophilus	Haemophilus_paraphrohaemolyticus	0	0	0.107244
4.2.1.113	compensated	Haemophilus	Haemophilus_quentini	0	0	0.107244
4.2.1.113	compensated	Actinomyces	Actinomyces_sp_HPA0247	0.00674748	0.0467479	0.107244
4.2.1.113	compensated	Haemophilus	Haemophilus_parainfluenzae	1.36592	2.80893	0.107244
4.2.1.113	compensated	Aggregatibacter	Aggregatibacter_aphrophilus	0.00540227	0.037428	0.107244
4.2.1.113	compensated	Aggregatibacter	Aggregatibacter_sp_oral_taxon_458	0.00485596	0.0202917	0.107244
4.2.1.113	compensated	Shewanella	Shewanella_algae	0	0	0.107244
4.2.1.113	compensated	Kluyvera	Kluyvera_georgiana	0	0	0.107244
4.2.1.113	compensated	Lactobacillus	Lactobacillus_fermentum	0.111723	0.39835	0.107244
4.2.1.113	compensated	Aeromonas	Aeromonas_allosaccharophila	0	0	0.107244
4.2.1.113	compensated	Aeromonas	Aeromonas_caviae	0	0	0.107244
4.2.1.113	compensated	Aeromonas	Aeromonas_media	0	0	0.107244
4.2.1.113	compensated	Aeromonas	Aeromonas_veronii	0	0	0.107244
4.2.1.113	compensated	Leclercia	Leclercia_adecarboxylata	0	0	0.107244
4.2.1.113	compensated	Aggregatibacter	Aggregatibacter_segnis	0.0172498	0.065215	0.107244
4.2.1.113	compensated	Plesiomonas	Plesiomonas_shigelloides	0	0	0.107244
4.2.1.113	compensated	Lactobacillus	Lactobacillus_vaginalis	0	0	0.107244
4.2.1.113	compensated	Lactococcus	Lactococcus_lactis	0.00353254	0.0244742	0.107244
4.2.1.113	compensated	Lactobacillus	Lactobacillus_oris	0	0	0.107244
4.2.1.113	compensated	Morganella	Morganella_morganii	0.00232219	0.0160886	0.107244
4.2.1.113	compensated	Klebsiella	Klebsiella_variicola	0.00410919	0.0168354	0.107244
4.2.1.113	compensated	Staphylococcus	Staphylococcus_aureus	0	0	0.107244
4.2.1.113	compensated	Staphylococcus	Staphylococcus_sciuri	0	0	0.107244
4.2.1.113	compensated	unclassified	Unclassified	2.20633	3.17883	0.107244
4.2.1.113	compensated	Actinomyces	Actinomyces_sp_oral_taxon_181	0.0215425	0.149251	0.107244
4.2.1.113	compensated	Actinomyces	Actinomyces_sp_S6_Spd3	0	0	0.107244
4.2.1.113	compensated	Eggerthella	Eggerthella_lenta	0.00553173	0.0383249	0.107244
4.2.1.113	compensated	Enterobacter	Enterobacter_bugandensis	0	0	0.107244
4.2.1.113	compensated	Enterobacter	Enterobacter_cloacae_complex	0.022004	0.107	0.107244
4.2.1.113	compensated	Enterobacter	Enterobacter_mori	0.0012616	0.00874065	0.107244
4.2.1.113	compensated	Enterococcus	Enterococcus_faecalis	0.0183634	0.127226	0.107244
4.2.1.113	compensated	Enterococcus	Enterococcus_gallinarum	0	0	0.107244
4.2.1.113	compensated	Bacteroides	Bacteroides_vulgatus	3.27569	5.23483	0.107244
4.2.1.113	compensated	Veillonella	Veillonella_atypica	1.69095	3.32728	0.107244
4.2.1.113	compensated	Veillonella	Veillonella_denticariosi	0.00574094	0.0397744	0.107244
4.2.1.113	compensated	Veillonella	Veillonella_dispar	1.30356	2.44579	0.107244
4.2.1.113	compensated	Veillonella	Veillonella_infantium	0.453514	0.748708	0.107244
4.2.1.113	compensated	Veillonella	Veillonella_parvula	1.45044	2.56534	0.107244
4.2.1.113	compensated	Veillonella	Veillonella_rogosae	0.0595155	0.383624	0.107244
4.2.1.113	compensated	Veillonella	Veillonella_tobetsuensis	0.688946	1.6311	0.107244
4.2.1.113	compensated	Weissella	Weissella_confusa	0.00762365	0.0383932	0.107244
4.2.99.20	compensated	Veillonella	Veillonella_atypica	0.947891	1.95982	0.000381347
4.2.99.20	compensated	Veillonella	Veillonella_dispar	0.775667	1.59739	0.000381347
4.2.99.20	compensated	Veillonella	Veillonella_infantium	0.516045	1.02544	0.000381347
4.2.99.20	compensated	Veillonella	Veillonella_parvula	2.29705	4.02752	0.000381347
4.2.99.20	compensated	Proteus	Proteus_hauseri	0.00549273	0.0380547	0.000381347
4.2.99.20	compensated	Raoultella	Raoultella_ornithinolytica	0	0	0.000381347
4.2.99.20	compensated	Shewanella	Shewanella_algae	0	0	0.000381347
4.2.99.20	compensated	Streptococcus	Streptococcus_infantis	0.00885388	0.0613414	0.000381347
4.2.99.20	compensated	Streptococcus	Streptococcus_mitis	0.0143419	0.0993639	0.000381347
4.2.99.20	compensated	Streptococcus	Streptococcus_sp_HMSC034E03	0.000687187	0.00476097	0.000381347
4.2.99.20	compensated	Klebsiella	Klebsiella_pneumoniae	1.23152	4.7047	0.000381347
4.2.99.20	compensated	Escherichia	Escherichia_coli	0.650301	1.31334	0.000381347
4.2.99.20	compensated	Haemophilus	Haemophilus_haemolyticus	0	0	0.000381347
4.2.99.20	compensated	Haemophilus	Haemophilus_influenzae	0	0	0.000381347
4.2.99.20	compensated	Aggregatibacter	Aggregatibacter_sp_oral_taxon_458	0.00914771	0.047743	0.000381347
4.2.99.20	compensated	Citrobacter	Citrobacter_braakii	0.00164075	0.00842148	0.000381347
4.2.99.20	compensated	Citrobacter	Citrobacter_europaeus	0	0	0.000381347
4.2.99.20	compensated	Citrobacter	Citrobacter_freundii	0.0142288	0.0710563	0.000381347
4.2.99.20	compensated	Haemophilus	Haemophilus_quentini	0	0	0.000381347
4.2.99.20	compensated	Citrobacter	Citrobacter_portucalensis	0.00716329	0.0375192	0.000381347
4.2.99.20	compensated	Haemophilus	Haemophilus_sputorum	0.00366421	0.0253864	0.000381347
4.2.99.20	compensated	Klebsiella	Klebsiella_aerogenes	0.0858414	0.568	0.000381347
4.2.99.20	compensated	Klebsiella	Klebsiella_michiganensis	0	0	0.000381347
4.2.99.20	compensated	Enterococcus	Enterococcus_gallinarum	0	0	0.000381347
4.2.99.20	compensated	Klebsiella	Klebsiella_variicola	0.000970167	0.00672151	0.000381347
4.2.99.20	compensated	Klebsiella	Klebsiella_variicola_CAG_634	0.00229171	0.0158774	0.000381347
4.2.99.20	compensated	Kluyvera	Kluyvera_cryocrescens	0	0	0.000381347
4.2.99.20	compensated	Lactobacillus	Lactobacillus_rhamnosus	0.0056374	0.039057	0.000381347
4.2.99.20	compensated	Veillonella	Veillonella_rogosae	0.0427972	0.179073	0.000381347
4.2.99.20	compensated	Veillonella	Veillonella_tobetsuensis	0.98451	2.45593	0.000381347
4.2.99.20	compensated	Weissella	Weissella_confusa	0.00593152	0.0410948	0.000381347
4.2.99.20	compensated	Citrobacter	Citrobacter_youngae	0.00714462	0.0374179	0.000381347
4.2.99.20	compensated	Eggerthella	Eggerthella_lenta	0	0	0.000381347
4.2.99.20	compensated	Enterobacter	Enterobacter_cloacae_complex	0.0139677	0.0705715	0.000381347
4.2.99.20	compensated	Enterococcus	Enterococcus_casseliflavus	0	0	0.000381347
4.2.99.20	compensated	Enterococcus	Enterococcus_faecalis	0.0161649	0.111993	0.000381347
4.2.99.20	compensated	Klebsiella	Klebsiella_quasipneumoniae	0.00369267	0.0255835	0.000381347
4.2.99.20	compensated	unclassified	Unclassified	1.2802	2.07938	0.000381347
4.2.99.20	compensated	Aeromonas	Aeromonas_caviae	0	0	0.000381347
4.2.99.20	compensated	Aeromonas	Aeromonas_media	0	0	0.000381347
4.2.99.20	compensated	Aggregatibacter	Aggregatibacter_segnis	0.0170911	0.0778922	0.000381347
4.2.99.20	compensated	Lactococcus	Lactococcus_lactis	0.0034544	0.0239328	0.000381347
4.2.99.20	compensated	Morganella	Morganella_morganii	0.00448456	0.03107	0.000381347
4.2.99.20	compensated	Plesiomonas	Plesiomonas_shigelloides	0	0	0.000381347
4.2.99.20	compensated	Haemophilus	Haemophilus_parainfluenzae	1.5051	3.19857	0.000381347
4.2.99.20	compensated	Haemophilus	Haemophilus_paraphrohaemolyticus	0	0	0.000381347
4.2.99.20	compensated	Klebsiella	Klebsiella_oxytoca	0	0	0.000381347
4.2.99.20	compensated	Haemophilus	Haemophilus_parahaemolyticus	0.0856533	0.426844	0.000381347
4.2.99.20	compensated	Haemophilus	Haemophilus_sp_HMSC71H05	0.0712804	0.28157	0.000381347
5.4.4.2	compensated	Bacteroides	Bacteroides_sartorii	0	0	0.249707
5.4.4.2	compensated	Bacteroides	Bacteroides_sp_D2	0	0	0.249707
5.4.4.2	compensated	Bacteroides	Bacteroides_thetaiotaomicron	0.673051	1.41049	0.249707
5.4.4.2	compensated	Bacteroides	Bacteroides_vulgatus	7.94167	10.4332	0.249707
5.4.4.2	compensated	Bacteroides	Bacteroides_vulgatus_CAG_6	5.87153	7.97337	0.249707
5.4.4.2	compensated	Bacteroides	Bacteroides_stercoris	3.99745	6.70577	0.249707
5.4.4.2	compensated	Klebsiella	Klebsiella_aerogenes	0.111251	0.735545	0.249707
5.4.4.2	compensated	Klebsiella	Klebsiella_michiganensis	0	0	0.249707
5.4.4.2	compensated	Klebsiella	Klebsiella_oxytoca	0	0	0.249707
5.4.4.2	compensated	Klebsiella	Klebsiella_pneumoniae	2.36712	9.89482	0.249707
5.4.4.2	compensated	Klebsiella	Klebsiella_quasipneumoniae	0.0190972	0.0656042	0.249707
5.4.4.2	compensated	Klebsiella	Klebsiella_variicola	0.0179032	0.0495492	0.249707
5.4.4.2	compensated	Kluyvera	Kluyvera_ascorbata	0	0	0.249707
5.4.4.2	compensated	Kluyvera	Kluyvera_cryocrescens	0	0	0.249707
5.4.4.2	compensated	Bacteroides	Bacteroides_coprophilus_CAG_333	0.446971	1.43511	0.249707
5.4.4.2	compensated	Citrobacter	Citrobacter_braakii	0.00438029	0.0264885	0.249707
5.4.4.2	compensated	Citrobacter	Citrobacter_europaeus	0	0	0.249707
5.4.4.2	compensated	Citrobacter	Citrobacter_freundii	0.0241851	0.133591	0.249707
5.4.4.2	compensated	Citrobacter	Citrobacter_portucalensis	0.0116621	0.0568185	0.249707
5.4.4.2	compensated	Aeromonas	Aeromonas_caviae	0	0	0.249707
5.4.4.2	compensated	Aeromonas	Aeromonas_allosaccharophila	0	0	0.249707
5.4.4.2	compensated	Aeromonas	Aeromonas_media	0	0	0.249707
5.4.4.2	compensated	Aeromonas	Aeromonas_veronii	0	0	0.249707
5.4.4.2	compensated	Aggregatibacter	Aggregatibacter_segnis	0.0115034	0.0485725	0.249707
5.4.4.2	compensated	Bacteroides	Bacteroides_ovatus	1.25717	2.06488	0.249707
5.4.4.2	compensated	Bacteroides	Bacteroides_caccae	0.820728	1.65032	0.249707
5.4.4.2	compensated	Bacteroides	Bacteroides_cellulosilyticus	0.377194	2.44962	0.249707
5.4.4.2	compensated	Bacteroides	Bacteroides_coprophilus	0.745558	2.80444	0.249707
5.4.4.2	compensated	Aggregatibacter	Aggregatibacter_sp_oral_taxon_458	0.0071339	0.0332991	0.249707
5.4.4.2	compensated	Bacteroides	Bacteroides_dorei	2.6014	7.33261	0.249707
5.4.4.2	compensated	Bacteroides	Bacteroides_faecis	0	0	0.249707
5.4.4.2	compensated	Bacteroides	Bacteroides_fragilis	1.48072	3.69532	0.249707
5.4.4.2	compensated	Bacteroides	Bacteroides_fragilis_CAG_47	1.10946	3.53424	0.249707
5.4.4.2	compensated	Citrobacter	Citrobacter_werkmanii	0	0	0.249707
5.4.4.2	compensated	Bacteroides	Bacteroides_plebeius	1.00479	4.52601	0.249707
5.4.4.2	compensated	Veillonella	Veillonella_infantium	0.376436	0.664688	0.249707
5.4.4.2	compensated	Veillonella	Veillonella_parvula	2.37012	4.26137	0.249707
5.4.4.2	compensated	Veillonella	Veillonella_rogosae	0.0213081	0.0844658	0.249707
5.4.4.2	compensated	Veillonella	Veillonella_tobetsuensis	0.391293	1.82992	0.249707
5.4.4.2	compensated	Escherichia	Escherichia_coli	1.61715	3.11288	0.249707
5.4.4.2	compensated	Haemophilus	Haemophilus_haemolyticus	0	0	0.249707
5.4.4.2	compensated	Haemophilus	Haemophilus_influenzae	0	0	0.249707
5.4.4.2	compensated	Haemophilus	Haemophilus_parahaemolyticus	0.0592996	0.270495	0.249707
5.4.4.2	compensated	Haemophilus	Haemophilus_parainfluenzae	1.26685	2.56376	0.249707
5.4.4.2	compensated	Haemophilus	Haemophilus_paraphrohaemolyticus	0	0	0.249707
5.4.4.2	compensated	Haemophilus	Haemophilus_quentini	0	0	0.249707
5.4.4.2	compensated	Haemophilus	Haemophilus_sputorum	0.00892915	0.0618629	0.249707
5.4.4.2	compensated	Enterococcus	Enterococcus_faecalis	0	0	0.249707
5.4.4.2	compensated	Citrobacter	Citrobacter_youngae	0.0141138	0.0684324	0.249707
5.4.4.2	compensated	Enterobacter	Enterobacter_cloacae_complex	0.020662	0.14315	0.249707
5.4.4.2	compensated	Enterococcus	Enterococcus_casseliflavus	0	0	0.249707
5.4.4.2	compensated	Enterococcus	Enterococcus_gallinarum	0	0	0.249707
5.4.4.2	compensated	Prevotella	Prevotella_sp_F0091	0.000751646	0.00520756	0.249707
5.4.4.2	compensated	Prevotella	Prevotella_oris	0.00663985	0.0460023	0.249707
5.4.4.2	compensated	Prevotella	Prevotella_pallens	0	0	0.249707
5.4.4.2	compensated	Kluyvera	Kluyvera_georgiana	0	0	0.249707
5.4.4.2	compensated	Lactococcus	Lactococcus_lactis	0.00510073	0.0353389	0.249707
5.4.4.2	compensated	Leclercia	Leclercia_adecarboxylata	0	0	0.249707
5.4.4.2	compensated	Parabacteroides	Parabacteroides_distasonis	1.22908	1.88081	0.249707
5.4.4.2	compensated	Plesiomonas	Plesiomonas_shigelloides	0	0	0.249707
5.4.4.2	compensated	Prevotella	Prevotella_buccae	0.92267	4.0178	0.249707
5.4.4.2	compensated	Prevotella	Prevotella_denticola	0.0719923	0.498777	0.249707
5.4.4.2	compensated	Prevotella	Prevotella_intermedia	0	0	0.249707
5.4.4.2	compensated	Prevotella	Prevotella_melaninogenica	0.0115218	0.0622524	0.249707
5.4.4.2	compensated	Prevotella	Prevotella_multiformis	0.00854583	0.0592073	0.249707
5.4.4.2	compensated	Prevotella	Prevotella_nigrescens	0	0	0.249707
5.4.4.2	compensated	Prevotella	Prevotella_sp_oral_taxon_306	0	0	0.249707
5.4.4.2	compensated	Prevotella	Prevotella_veroralis	0	0	0.249707
5.4.4.2	compensated	Prevotella	Prevotella_salivae	0	0	0.249707
5.4.4.2	compensated	Bacteroides	Bacteroides_xylanisolvens	1.22382	2.60525	0.249707
5.4.4.2	compensated	unclassified	Unclassified	4.22535	4.60097	0.249707
5.4.4.2	compensated	Veillonella	Veillonella_atypica	1.62015	3.21311	0.249707
5.4.4.2	compensated	Raoultella	Raoultella_ornithinolytica	0	0	0.249707
5.4.4.2	compensated	Raoultella	Raoultella_planticola	0	0	0.249707
5.4.4.2	compensated	Veillonella	Veillonella_dispar	1.40371	2.85005	0.249707
6.2.1.26	compensated	Haemophilus	Haemophilus_parainfluenzae	1.31938	2.75283	0.0108273
6.2.1.26	compensated	Haemophilus	Haemophilus_paraphrohaemolyticus	0	0	0.0108273
6.2.1.26	compensated	Bacteroides	Bacteroides_coprophilus_CAG_333	0.695099	2.21755	0.0108273
6.2.1.26	compensated	Bacteroides	Bacteroides_ovatus	1.03663	2.45504	0.0108273
6.2.1.26	compensated	Bacteroides	Bacteroides_thetaiotaomicron	0.360073	1.26526	0.0108273
6.2.1.26	compensated	Bacteroides	Bacteroides_uniformis	0.809474	3.09448	0.0108273
6.2.1.26	compensated	Bacteroides	Bacteroides_xylanisolvens	0.280429	0.61957	0.0108273
6.2.1.26	compensated	Citrobacter	Citrobacter_braakii	0.00109869	0.00600507	0.0108273
6.2.1.26	compensated	Citrobacter	Citrobacter_europaeus	0	0	0.0108273
6.2.1.26	compensated	Citrobacter	Citrobacter_freundii	0.0112349	0.0605295	0.0108273
6.2.1.26	compensated	Citrobacter	Citrobacter_portucalensis	0.00651075	0.0319278	0.0108273
6.2.1.26	compensated	Citrobacter	Citrobacter_youngae	0.00332438	0.0230319	0.0108273
6.2.1.26	compensated	Enterobacter	Enterobacter_cloacae_complex	0.0107849	0.0584518	0.0108273
6.2.1.26	compensated	Enterococcus	Enterococcus_faecalis	0.0117069	0.081108	0.0108273
6.2.1.26	compensated	Enterococcus	Enterococcus_gallinarum	0	0	0.0108273
6.2.1.26	compensated	Escherichia	Escherichia_coli	0.849882	1.76563	0.0108273
6.2.1.26	compensated	Haemophilus	Haemophilus_haemolyticus	0	0	0.0108273
6.2.1.26	compensated	Haemophilus	Haemophilus_parahaemolyticus	0.0629706	0.305283	0.0108273
6.2.1.26	compensated	Prevotella	Prevotella_veroralis	0	0	0.0108273
6.2.1.26	compensated	Blautia	Ruminococcus_torques	0.364571	0.834337	0.0108273
6.2.1.26	compensated	Haemophilus	Haemophilus_quentini	0	0	0.0108273
6.2.1.26	compensated	Weissella	Weissella_confusa	0.00341225	0.0236408	0.0108273
6.2.1.26	compensated	Haemophilus	Haemophilus_sputorum	0.007285	0.050472	0.0108273
6.2.1.26	compensated	Klebsiella	Klebsiella_aerogenes	0.0575347	0.370794	0.0108273
6.2.1.26	compensated	Klebsiella	Klebsiella_michiganensis	0	0	0.0108273
6.2.1.26	compensated	Haemophilus	Haemophilus_sp_HMSC71H05	0.034129	0.116749	0.0108273
6.2.1.26	compensated	Klebsiella	Klebsiella_pneumoniae	1.21612	5.71679	0.0108273
6.2.1.26	compensated	Klebsiella	Klebsiella_quasipneumoniae	0.134599	0.61794	0.0108273
6.2.1.26	compensated	Klebsiella	Klebsiella_variicola	0.00379771	0.0178169	0.0108273
6.2.1.26	compensated	Kluyvera	Kluyvera_ascorbata	0	0	0.0108273
6.2.1.26	compensated	Lactobacillus	Lactobacillus_fermentum	0.152367	0.468899	0.0108273
6.2.1.26	compensated	Lactobacillus	Lactobacillus_oris	0	0	0.0108273
6.2.1.26	compensated	Lactobacillus	Lactobacillus_plantarum	0.0250252	0.17338	0.0108273
6.2.1.26	compensated	Lactobacillus	Lactobacillus_reuteri	0	0	0.0108273
6.2.1.26	compensated	Lactobacillus	Lactobacillus_rhamnosus	0.0373617	0.193251	0.0108273
6.2.1.26	compensated	Lactobacillus	Lactobacillus_salivarius	1.27991	3.45838	0.0108273
6.2.1.26	compensated	Lactococcus	Lactococcus_lactis	0.00510521	0.0353699	0.0108273
6.2.1.26	compensated	Leuconostoc	Leuconostoc_garlicum	0	0	0.0108273
6.2.1.26	compensated	Klebsiella	Klebsiella_oxytoca	0	0	0.0108273
6.2.1.26	compensated	Aeromonas	Aeromonas_caviae	0	0	0.0108273
6.2.1.26	compensated	Aeromonas	Aeromonas_media	0	0	0.0108273
6.2.1.26	compensated	Bacteroides	Bacteroides_coprophilus	0.679175	2.2486	0.0108273
6.2.1.26	compensated	Prevotella	Prevotella_intermedia	0	0	0.0108273
6.2.1.26	compensated	Prevotella	Prevotella_nigrescens	0.0034459	0.0238739	0.0108273
6.2.1.26	compensated	Prevotella	Prevotella_pallens	0	0	0.0108273
6.2.1.26	compensated	Weissella	Weissella_cibaria	0	0	0.0108273
6.2.1.26	compensated	Veillonella	Veillonella_parvula	1.61452	3.32501	0.0108273
6.2.1.26	compensated	Staphylococcus	Staphylococcus_aureus	0	0	0.0108273
6.2.1.26	compensated	Staphylococcus	Staphylococcus_capitis	0	0	0.0108273
6.2.1.26	compensated	unclassified	Unclassified	1.93246	2.26122	0.0108273
6.2.1.26	compensated	Veillonella	Veillonella_atypica	1.22169	2.74736	0.0108273
6.2.1.26	compensated	Veillonella	Veillonella_denticariosi	0.00219396	0.0152002	0.0108273
6.2.1.26	compensated	Morganella	Morganella_morganii	0.00156052	0.0108116	0.0108273
6.2.1.26	compensated	Parabacteroides	Parabacteroides_distasonis	0.0237348	0.164439	0.0108273
6.2.1.26	compensated	Plesiomonas	Plesiomonas_shigelloides	0	0	0.0108273
6.2.1.26	compensated	Veillonella	Veillonella_rogosae	0.0386709	0.215446	0.0108273
6.2.1.26	compensated	Veillonella	Veillonella_rodentium	0.000826042	0.00572298	0.0108273
6.2.1.26	compensated	Veillonella	Veillonella_dispar	1.84391	3.63671	0.0108273
6.2.1.26	compensated	Veillonella	Veillonella_infantium	0.21564	0.586146	0.0108273
6.2.1.26	compensated	Veillonella	Veillonella_tobetsuensis	0.714733	1.90747	0.0108273
2.1.1.163	decompensated	Prevotella	Prevotella_multiformis	0.0108422	0.0719194	0.475865
2.1.1.163	decompensated	Prevotella	Prevotella_buccae	0.488284	1.97011	0.475865
2.1.1.163	decompensated	Prevotella	Prevotella_copri	11.1467	29.325	0.475865
2.1.1.163	decompensated	Atlantibacter	Atlantibacter_hermannii	0	0	0.475865
2.1.1.163	decompensated	Prevotella	Prevotella_nigrescens	0.00287489	0.0190698	0.475865
2.1.1.163	decompensated	Prevotella	Prevotella_sp_CAG_279	0.276774	1.1706	0.475865
2.1.1.163	decompensated	Prevotella	Prevotella_salivae	0	0	0.475865
2.1.1.163	decompensated	Prevotella	Prevotella_jejuni	0.00138316	0.00917484	0.475865
2.1.1.163	decompensated	Prevotella	Prevotella_melaninogenica	0.0048235	0.0319955	0.475865
2.1.1.163	decompensated	Alloprevotella	Alloprevotella_tannerae	0.00554998	0.0368144	0.475865
2.1.1.163	decompensated	Prevotella	Prevotella_oris	0.0137096	0.0518436	0.475865
2.1.1.163	decompensated	Prevotella	Prevotella_pallens	0.0164318	0.0891183	0.475865
2.1.1.163	decompensated	Paraprevotella	Paraprevotella_clara_CAG_116	0.458072	1.10613	0.475865
2.1.1.163	decompensated	Bacteroides	Bacteroides_caccae	2.66314	3.55881	0.475865
2.1.1.163	decompensated	Bacteroides	Bacteroides_cellulosilyticus	0.525851	2.22013	0.475865
2.1.1.163	decompensated	Clostridium	Clostridium_disporicum	0.0301134	0.139599	0.475865
2.1.1.163	decompensated	Prevotella	Prevotella_sp_AM42_24	0	0	0.475865
2.1.1.163	decompensated	Prevotella	Prevotella_sp_CAG_1031	0	0	0.475865
2.1.1.163	decompensated	Parvimonas	Parvimonas_sp_KA00067	0	0	0.475865
2.1.1.163	decompensated	Prevotella	Prevotella_copri_CAG_164	1.30592	4.01955	0.475865
2.1.1.163	decompensated	Prevotella	Prevotella_denticola	0.00821955	0.0545223	0.475865
2.1.1.163	decompensated	Parasutterella	Parasutterella_excrementihominis	0.0910652	0.28582	0.475865
2.1.1.163	decompensated	Alistipes	Alistipes_putredinis_CAG_67	0.481642	1.00546	0.475865
2.1.1.163	decompensated	Veillonella	Veillonella_parvula	2.38043	4.54954	0.475865
2.1.1.163	decompensated	Veillonella	Veillonella_rogosae	0.611924	1.42916	0.475865
2.1.1.163	decompensated	Prevotella	Prevotella_sp_oral_taxon_306	0.00129014	0.0085578	0.475865
2.1.1.163	decompensated	Prevotella	Prevotella_stercorea	1.57473	4.32576	0.475865
2.1.1.163	decompensated	Prevotella	Prevotella_stercorea_CAG_629	1.55822	4.1583	0.475865
2.1.1.163	decompensated	Prevotella	Prevotella_veroralis	0.0093525	0.0620375	0.475865
2.1.1.163	decompensated	Proteobacteria_unclassified	Proteobacteria_bacterium_CAG_139	0.0614503	0.23271	0.475865
2.1.1.163	decompensated	Proteus	Proteus_vulgaris	0	0	0.475865
2.1.1.163	decompensated	Providencia	Providencia_alcalifaciens	0	0	0.475865
2.1.1.163	decompensated	Citrobacter	Citrobacter_portucalensis	0.0265064	0.175823	0.475865
2.1.1.163	decompensated	Citrobacter	Citrobacter_werkmanii	0.0011208	0.00743452	0.475865
2.1.1.163	decompensated	Citrobacter	Citrobacter_youngae	0.00199684	0.00926679	0.475865
2.1.1.163	decompensated	Lachnoclostridium	Clostridium_citroniae	0.0164041	0.064931	0.475865
2.1.1.163	decompensated	Lachnoclostridium	Clostridium_clostridioforme	0.0496034	0.329032	0.475865
2.1.1.163	decompensated	Prevotella	Prevotella_sp_F0091	0.00623193	0.041338	0.475865
2.1.1.163	decompensated	Paraprevotella	Paraprevotella_clara	0.245716	0.604334	0.475865
2.1.1.163	decompensated	Staphylococcus	Staphylococcus_aureus	0	0	0.475865
2.1.1.163	decompensated	Staphylococcus	Staphylococcus_capitis	0	0	0.475865
2.1.1.163	decompensated	Streptococcus	Streptococcus_infantis	0.00130368	0.00864765	0.475865
2.1.1.163	decompensated	Streptococcus	Streptococcus_mitis	0.00503573	0.0334032	0.475865
2.1.1.163	decompensated	Intestinimonas	Intestinimonas_butyriciproducens	0.249298	0.960904	0.475865
2.1.1.163	decompensated	Klebsiella	Klebsiella_aerogenes	0	0	0.475865
2.1.1.163	decompensated	Klebsiella	Klebsiella_michiganensis	0.00711973	0.0330922	0.475865
2.1.1.163	decompensated	Klebsiella	Klebsiella_oxytoca	0.117741	0.511426	0.475865
2.1.1.163	decompensated	Veillonella	Veillonella_denticariosi	0	0	0.475865
2.1.1.163	decompensated	Veillonella	Veillonella_dispar	1.62439	2.7075	0.475865
2.1.1.163	decompensated	Veillonella	Veillonella_infantium	1.76057	4.68548	0.475865
2.1.1.163	decompensated	Klebsiella	Klebsiella_variicola_CAG_634	0.0303229	0.153904	0.475865
2.1.1.163	decompensated	Kluyvera	Kluyvera_ascorbata	0.00329586	0.0218623	0.475865
2.1.1.163	decompensated	Kluyvera	Kluyvera_cryocrescens	0.010011	0.0664055	0.475865
2.1.1.163	decompensated	Kluyvera	Kluyvera_georgiana	0.00993682	0.0659134	0.475865
2.1.1.163	decompensated	Lactobacillus	Lactobacillus_crispatus	0.0113243	0.0751172	0.475865
2.1.1.163	decompensated	Lactobacillus	Lactobacillus_fermentum	0.0606975	0.320598	0.475865
2.1.1.163	decompensated	Lactobacillus	Lactobacillus_gasseri	0.000969795	0.0064329	0.475865
2.1.1.163	decompensated	Lactobacillus	Lactobacillus_johnsonii	0	0	0.475865
2.1.1.163	decompensated	Lactobacillus	Lactobacillus_oris	0.0103385	0.0489604	0.475865
2.1.1.163	decompensated	Lactobacillus	Lactobacillus_paragasseri	0.11362	0.555963	0.475865
2.1.1.163	decompensated	Lactobacillus	Lactobacillus_reuteri	0.0574657	0.381184	0.475865
2.1.1.163	decompensated	Lactobacillus	Lactobacillus_rhamnosus	0	0	0.475865
2.1.1.163	decompensated	Lactobacillus	Lactobacillus_vaginalis	0.0056117	0.0372238	0.475865
2.1.1.163	decompensated	Lactococcus	Lactococcus_lactis	0	0	0.475865
2.1.1.163	decompensated	Lautropia	Lautropia_mirabilis	0	0	0.475865
2.1.1.163	decompensated	Leclercia	Leclercia_adecarboxylata	0.00109905	0.00729024	0.475865
2.1.1.163	decompensated	Leuconostoc	Leuconostoc_garlicum	0	0	0.475865
2.1.1.163	decompensated	Megasphaera	Megasphaera_elsdenii	0.0133696	0.088684	0.475865
2.1.1.163	decompensated	Morganella	Morganella_morganii	0	0	0.475865
2.1.1.163	decompensated	Neisseria	Neisseria_flavescens	0.00146234	0.00970007	0.475865
2.1.1.163	decompensated	Neisseria	Neisseria_mucosa	0	0	0.475865
2.1.1.163	decompensated	Neisseria	Neisseria_subflava	0.00137148	0.00909735	0.475865
2.1.1.163	decompensated	Pseudoflavonifractor	Pseudoflavonifractor_sp_An184	0	0	0.475865
2.1.1.163	decompensated	Parabacteroides	Parabacteroides_distasonis	1.47601	2.3323	0.475865
2.1.1.163	decompensated	Parabacteroides	Parabacteroides_goldsteinii	0.0241515	0.115248	0.475865
2.1.1.163	decompensated	Parabacteroides	Parabacteroides_gordonii	0.0420066	0.27864	0.475865
2.1.1.163	decompensated	Parabacteroides	Parabacteroides_johnsonii	0.0261024	0.146142	0.475865
2.1.1.163	decompensated	Parabacteroides	Parabacteroides_merdae	0.461482	1.05352	0.475865
2.1.1.163	decompensated	Parabacteroides	Parabacteroides_sp_CAG_409	0	0	0.475865
2.1.1.163	decompensated	Actinomyces	Actinomyces_odontolyticus	0	0	0.475865
2.1.1.163	decompensated	Actinomyces	Actinomyces_sp_HMSC035G02	0	0	0.475865
2.1.1.163	decompensated	Actinomyces	Actinomyces_sp_HPA0247	0	0	0.475865
2.1.1.163	decompensated	Bacteroides	Bacteroides_sp_OM05_12	0.020973	0.139119	0.475865
2.1.1.163	decompensated	Bacteroides	Bacteroides_stercoris	5.60497	10.1306	0.475865
2.1.1.163	decompensated	Aeromonas	Aeromonas_caviae	0.0275112	0.134353	0.475865
2.1.1.163	decompensated	Aeromonas	Aeromonas_veronii	0.0775629	0.305254	0.475865
2.1.1.163	decompensated	Akkermansia	Akkermansia_muciniphila	0.0603426	0.229899	0.475865
2.1.1.163	decompensated	Alistipes	Alistipes_finegoldii	0.117867	0.410562	0.475865
2.1.1.163	decompensated	Alistipes	Alistipes_indistinctus	0	0	0.475865
2.1.1.163	decompensated	Alistipes	Alistipes_onderdonkii	0.0829941	0.550521	0.475865
2.1.1.163	decompensated	Alistipes	Alistipes_putredinis	0.524961	0.863666	0.475865
2.1.1.163	decompensated	Bilophila	Bilophila_wadsworthia	0.0392236	0.127645	0.475865
2.1.1.163	decompensated	Blautia	Blautia_wexlerae	1.46476	3.71944	0.475865
2.1.1.163	decompensated	Butyricimonas	Butyricimonas_virosa	0.0975885	0.292528	0.475865
2.1.1.163	decompensated	Campylobacter	Campylobacter_concisus	0.103645	0.310525	0.475865
2.1.1.163	decompensated	Campylobacter	Campylobacter_gracilis	0	0	0.475865
2.1.1.163	decompensated	Campylobacter	Campylobacter_showae	0.0080697	0.0535284	0.475865
2.1.1.163	decompensated	Bacteroides	Bacteroides_clarus	0.096624	0.444841	0.475865
2.1.1.163	decompensated	Bacteroides	Bacteroides_coprocola	0.614367	2.20349	0.475865
2.1.1.163	decompensated	Bacteroides	Bacteroides_coprocola_CAG_162	0.469028	1.62449	0.475865
2.1.1.163	decompensated	Bacteroides	Bacteroides_coprophilus	0	0	0.475865
2.1.1.163	decompensated	Bacteroides	Bacteroides_coprophilus_CAG_333	0	0	0.475865
2.1.1.163	decompensated	Bacteroides	Bacteroides_dorei	6.01979	14.2196	0.475865
2.1.1.163	decompensated	Bacteroides	Bacteroides_eggerthii	0.144959	0.867502	0.475865
2.1.1.163	decompensated	Bacteroides	Bacteroides_faecichinchillae	0	0	0.475865
2.1.1.163	decompensated	Bacteroides	Bacteroides_faecis	0	0	0.475865
2.1.1.163	decompensated	Bacteroides	Bacteroides_finegoldii	0.932192	2.38972	0.475865
2.1.1.163	decompensated	Bacteroides	Bacteroides_fluxus	0	0	0.475865
2.1.1.163	decompensated	Bacteroides	Bacteroides_fragilis	1.18168	1.91725	0.475865
2.1.1.163	decompensated	Bacteroides	Bacteroides_fragilis_CAG_47	0.291582	0.586079	0.475865
2.1.1.163	decompensated	Bacteroides	Bacteroides_intestinalis	0.427194	1.36934	0.475865
2.1.1.163	decompensated	Bacteroides	Bacteroides_massiliensis	1.59359	3.75276	0.475865
2.1.1.163	decompensated	Bacteroides	Bacteroides_nordii	0.172559	0.533326	0.475865
2.1.1.163	decompensated	Bacteroides	Bacteroides_oleiciplenus	0	0	0.475865
2.1.1.163	decompensated	Bacteroides	Bacteroides_ovatus	1.98568	3.12979	0.475865
2.1.1.163	decompensated	Bacteroides	Bacteroides_plebeius	1.97176	5.45258	0.475865
2.1.1.163	decompensated	Bacteroides	Bacteroides_plebeius_CAG_211	2.53617	6.46082	0.475865
2.1.1.163	decompensated	Bacteroides	Bacteroides_salyersiae	0.170918	0.509902	0.475865
2.1.1.163	decompensated	Bacteroides	Bacteroides_sartorii	0	0	0.475865
2.1.1.163	decompensated	Bacteroides	Bacteroides_sp_43_108	0	0	0.475865
2.1.1.163	decompensated	Bacteroides	Bacteroides_sp_CAG_530	0.0104091	0.0690462	0.475865
2.1.1.163	decompensated	Paraprevotella	Paraprevotella_xylaniphila	0.0756848	0.245785	0.475865
2.1.1.163	decompensated	Actinomyces	Actinomyces_sp_oral_taxon_181	0.00275393	0.0182675	0.475865
2.1.1.163	decompensated	Aeromonas	Aeromonas_allosaccharophila	0.0454618	0.210824	0.475865
2.1.1.163	decompensated	Streptococcus	Streptococcus_oralis	0.00271166	0.0179871	0.475865
2.1.1.163	decompensated	Streptococcus	Streptococcus_sp_HMSC034E03	0	0	0.475865
2.1.1.163	decompensated	unclassified	Unclassified	5.15083	4.63891	0.475865
2.1.1.163	decompensated	Prevotella	Prevotella_sp_CAG_520	0.221104	1.46664	0.475865
2.1.1.163	decompensated	Prevotella	Prevotella_sp_CAG_5226	0.120471	0.799117	0.475865
2.1.1.163	decompensated	Prevotella	Prevotella_sp_CAG_617	0	0	0.475865
2.1.1.163	decompensated	Prevotella	Prevotella_sp_CAG_891	0	0	0.475865
2.1.1.163	decompensated	Anaeromassilibacillus	Anaeromassilibacillus_sp_An250	0	0	0.475865
2.1.1.163	decompensated	Anaerotruncus	Anaerotruncus_colihominis	0	0	0.475865
2.1.1.163	decompensated	Veillonella	Veillonella_sp_CAG_933	0	0	0.475865
2.1.1.163	decompensated	Veillonella	Veillonella_tobetsuensis	0.66971	1.79987	0.475865
2.1.1.163	decompensated	Weissella	Weissella_cibaria	0	0	0.475865
2.1.1.163	decompensated	Weissella	Weissella_confusa	0	0	0.475865
2.1.1.163	decompensated	Citrobacter	Citrobacter_braakii	0.0092922	0.0438103	0.475865
2.1.1.163	decompensated	Citrobacter	Citrobacter_europaeus	0.00832559	0.0552257	0.475865
2.1.1.163	decompensated	Citrobacter	Citrobacter_freundii	0.0232899	0.0838018	0.475865
2.1.1.163	decompensated	Veillonella	Veillonella_atypica	3.96666	8.05498	0.475865
2.1.1.163	decompensated	Prevotella	Prevotella_histicola	0.00894361	0.0593252	0.475865
2.1.1.163	decompensated	Prevotella	Prevotella_intermedia	0.0741826	0.31967	0.475865
2.1.1.163	decompensated	Enterococcus	Enterococcus_gallinarum	0	0	0.475865
2.1.1.163	decompensated	Escherichia	Escherichia_coli	9.6761	21.3491	0.475865
2.1.1.163	decompensated	Lachnospiraceae_unclassified	Eubacterium_rectale	0.146799	0.477114	0.475865
2.1.1.163	decompensated	Flavonifractor	Flavonifractor_plautii	0.0608513	0.139848	0.475865
2.1.1.163	decompensated	Fusobacterium	Fusobacterium_gonidiaformans	0.00728455	0.0483202	0.475865
2.1.1.163	decompensated	Fusobacterium	Fusobacterium_nucleatum	0.221245	0.828704	0.475865
2.1.1.163	decompensated	Fusobacterium	Fusobacterium_periodonticum	0.011009	0.0730253	0.475865
2.1.1.163	decompensated	Shewanella	Shewanella_algae	0.0203314	0.0965578	0.475865
2.1.1.163	decompensated	Desulfovibrionaceae_unclassified	Desulfovibrionaceae_bacterium	0	0	0.475865
2.1.1.163	decompensated	Roseburia	Roseburia_faecis	0.633899	2.42811	0.475865
2.1.1.163	decompensated	Klebsiella	Klebsiella_pneumoniae	3.98528	11.1848	0.475865
2.1.1.163	decompensated	Klebsiella	Klebsiella_quasipneumoniae	0.00579511	0.0165892	0.475865
2.1.1.163	decompensated	Oxalobacter	Oxalobacter_formigenes	0	0	0.475865
2.1.1.163	decompensated	Rothia	Rothia_mucilaginosa	0	0	0.475865
2.1.1.163	decompensated	Blautia	Ruminococcus_torques	0.0279448	0.115	0.475865
2.1.1.163	decompensated	Raoultella	Raoultella_planticola	0.00224161	0.0148692	0.475865
2.1.1.163	decompensated	Raoultella	Raoultella_ornithinolytica	0.0033212	0.0220304	0.475865
2.1.1.163	decompensated	Klebsiella	Klebsiella_variicola	0.0919306	0.487291	0.475865
2.1.1.163	decompensated	Comamonas	Comamonas_kerstersii	0.0046895	0.0311066	0.475865
2.1.1.163	decompensated	Coprobacter	Coprobacter_fastidiosus	0	0	0.475865
2.1.1.163	decompensated	Bacteroides	Bacteroides_sp_D2	0.0600218	0.39814	0.475865
2.1.1.163	decompensated	Fusobacterium	Fusobacterium_sp_CAG_439	0	0	0.475865
2.1.1.163	decompensated	Helicobacter	Helicobacter_equorum	0.0125737	0.0834044	0.475865
2.1.1.163	decompensated	Bacteroides	Bacteroides_thetaiotaomicron	3.78118	4.79786	0.475865
2.1.1.163	decompensated	Bacteroides	Bacteroides_uniformis	8.88265	29.6143	0.475865
2.1.1.163	decompensated	Bacteroides	Bacteroides_uniformis_CAG_3	1.32036	2.81607	0.475865
2.1.1.163	decompensated	Bacteroides	Bacteroides_vulgatus	8.76067	6.93224	0.475865
2.1.1.163	decompensated	Bacteroides	Bacteroides_vulgatus_CAG_6	9.29903	7.54207	0.475865
2.1.1.163	decompensated	Bacteroides	Bacteroides_xylanisolvens	2.00464	3.29431	0.475865
2.1.1.163	decompensated	Barnesiella	Barnesiella_intestinihominis	0.0339092	0.160412	0.475865
2.1.1.163	decompensated	Corynebacterium	Corynebacterium_matruchotii	0	0	0.475865
2.1.1.163	decompensated	Desulfovibrio	Desulfovibrio_piger	0.0101613	0.0674027	0.475865
2.1.1.163	decompensated	Catenibacterium	Catenibacterium_mitsuokai	0	0	0.475865
2.1.1.163	decompensated	Coprobacter	Coprobacter_secundus	0.0033295	0.0220854	0.475865
2.1.1.163	decompensated	Eisenbergiella	Eisenbergiella_tayi	0.101812	0.675342	0.475865
2.1.1.163	decompensated	Enterobacter	Enterobacter_cloacae_complex	0.0664992	0.225357	0.475865
2.1.1.163	decompensated	Enterobacter	Enterobacter_mori	0.00543316	0.0360395	0.475865
2.1.1.163	decompensated	Dorea	Dorea_longicatena	0.010576	0.0519066	0.475865
2.2.1.9	decompensated	Bacteroides	Bacteroides_uniformis_CAG_3	0.799371	2.03858	0.233437
2.2.1.9	decompensated	Prevotella	Prevotella_copri	7.914	19.3389	0.233437
2.2.1.9	decompensated	Bacteroides	Bacteroides_xylanisolvens	1.96936	3.18785	0.233437
2.2.1.9	decompensated	Veillonella	Veillonella_tobetsuensis	0.55196	1.34749	0.233437
2.2.1.9	decompensated	Prevotella	Prevotella_stercorea	1.47178	3.42522	0.233437
2.2.1.9	decompensated	Prevotella	Prevotella_stercorea_CAG_629	1.78681	4.75259	0.233437
2.2.1.9	decompensated	Prevotella	Prevotella_veroralis	0.0109177	0.0577584	0.233437
2.2.1.9	decompensated	Raoultella	Raoultella_ornithinolytica	0.00509491	0.0337958	0.233437
2.2.1.9	decompensated	Prevotella	Prevotella_oris	0.00487057	0.0323077	0.233437
2.2.1.9	decompensated	Staphylococcus	Staphylococcus_aureus	0	0	0.233437
2.2.1.9	decompensated	unclassified	Unclassified	4.69842	4.52457	0.233437
2.2.1.9	decompensated	Prevotella	Prevotella_sp_AM42_24	0	0	0.233437
2.2.1.9	decompensated	Prevotella	Prevotella_sp_CAG_1031	0	0	0.233437
2.2.1.9	decompensated	Prevotella	Prevotella_sp_CAG_279	0.257411	1.08748	0.233437
2.2.1.9	decompensated	Prevotella	Prevotella_denticola	0.00703266	0.0466494	0.233437
2.2.1.9	decompensated	Prevotella	Prevotella_histicola	0	0	0.233437
2.2.1.9	decompensated	Prevotella	Prevotella_intermedia	0.106721	0.469055	0.233437
2.2.1.9	decompensated	Actinomyces	Actinomyces_sp_oral_taxon_181	0	0	0.233437
2.2.1.9	decompensated	Aeromonas	Aeromonas_allosaccharophila	0.0372563	0.172801	0.233437
2.2.1.9	decompensated	Aeromonas	Aeromonas_caviae	0.0184107	0.0870524	0.233437
2.2.1.9	decompensated	Aeromonas	Aeromonas_media	0.00904555	0.0419391	0.233437
2.2.1.9	decompensated	Aeromonas	Aeromonas_veronii	0.0659549	0.260346	0.233437
2.2.1.9	decompensated	Bacteroides	Bacteroides_vulgatus	10.8112	8.56998	0.233437
2.2.1.9	decompensated	Weissella	Weissella_confusa	0	0	0.233437
2.2.1.9	decompensated	Parabacteroides	Parabacteroides_merdae	0.382403	0.949292	0.233437
2.2.1.9	decompensated	Parabacteroides	Parabacteroides_sp_CAG_409	0	0	0.233437
2.2.1.9	decompensated	Haemophilus	Haemophilus_haemolyticus	0.0144193	0.0956466	0.233437
2.2.1.9	decompensated	Paraprevotella	Paraprevotella_xylaniphila	0.208848	0.83199	0.233437
2.2.1.9	decompensated	Plesiomonas	Plesiomonas_shigelloides	0	0	0.233437
2.2.1.9	decompensated	Paraprevotella	Paraprevotella_clara	0.202845	0.471909	0.233437
2.2.1.9	decompensated	Bacteroides	Bacteroides_dorei	3.16174	7.64249	0.233437
2.2.1.9	decompensated	Bacteroides	Bacteroides_coprocola_CAG_162	0.484014	1.77635	0.233437
2.2.1.9	decompensated	Prevotella	Prevotella_melaninogenica	0	0	0.233437
2.2.1.9	decompensated	Prevotella	Prevotella_multiformis	0.00843002	0.0559184	0.233437
2.2.1.9	decompensated	Prevotella	Prevotella_nigrescens	0.00405739	0.0269137	0.233437
2.2.1.9	decompensated	Prevotella	Prevotella_jejuni	0	0	0.233437
2.2.1.9	decompensated	Prevotella	Prevotella_pallens	0.0172563	0.0821017	0.233437
2.2.1.9	decompensated	Prevotella	Prevotella_salivae	0	0	0.233437
2.2.1.9	decompensated	Haemophilus	Haemophilus_paraphrohaemolyticus	0.0202934	0.134611	0.233437
2.2.1.9	decompensated	Paraprevotella	Paraprevotella_clara_CAG_116	0.185858	0.450456	0.233437
2.2.1.9	decompensated	Bacteroides	Bacteroides_coprocola	0.536339	2.03029	0.233437
2.2.1.9	decompensated	Bacteroides	Bacteroides_coprophilus	0	0	0.233437
2.2.1.9	decompensated	Bacteroides	Bacteroides_coprophilus_CAG_333	0	0	0.233437
2.2.1.9	decompensated	Bacteroides	Bacteroides_oleiciplenus	0	0	0.233437
2.2.1.9	decompensated	Bacteroides	Bacteroides_ovatus	2.20348	2.7809	0.233437
2.2.1.9	decompensated	Bacteroides	Bacteroides_plebeius	2.32105	7.47215	0.233437
2.2.1.9	decompensated	Bacteroides	Bacteroides_plebeius_CAG_211	1.43559	4.29298	0.233437
2.2.1.9	decompensated	Bacteroides	Bacteroides_salyersiae	0.182434	0.57321	0.233437
2.2.1.9	decompensated	Bacteroides	Bacteroides_sartorii	0	0	0.233437
2.2.1.9	decompensated	Bacteroides	Bacteroides_sp_D2	0.0514289	0.34114	0.233437
2.2.1.9	decompensated	Bacteroides	Bacteroides_stercoris	4.92075	8.14189	0.233437
2.2.1.9	decompensated	Veillonella	Veillonella_atypica	3.27101	6.87608	0.233437
2.2.1.9	decompensated	Veillonella	Veillonella_denticariosi	0	0	0.233437
2.2.1.9	decompensated	Veillonella	Veillonella_dispar	3.01647	5.98694	0.233437
2.2.1.9	decompensated	Prevotella	Prevotella_sp_CAG_617	0	0	0.233437
2.2.1.9	decompensated	Bacteroides	Bacteroides_nordii	0.219084	0.565973	0.233437
2.2.1.9	decompensated	Actinomyces	Actinomyces_sp_oral_taxon_180	0	0	0.233437
2.2.1.9	decompensated	Barnesiella	Barnesiella_intestinihominis	0.0346974	0.181846	0.233437
2.2.1.9	decompensated	Bifidobacterium	Bifidobacterium_adolescentis	0	0	0.233437
2.2.1.9	decompensated	Bifidobacterium	Bifidobacterium_longum	0	0	0.233437
2.2.1.9	decompensated	Citrobacter	Citrobacter_braakii	0.00705709	0.0384951	0.233437
2.2.1.9	decompensated	Citrobacter	Citrobacter_europaeus	0.00134752	0.00893845	0.233437
2.2.1.9	decompensated	Aggregatibacter	Aggregatibacter_aphrophilus	0	0	0.233437
2.2.1.9	decompensated	Aggregatibacter	Aggregatibacter_segnis	0.0614428	0.38537	0.233437
2.2.1.9	decompensated	Aggregatibacter	Aggregatibacter_sp_oral_taxon_458	0.0409075	0.244367	0.233437
2.2.1.9	decompensated	Akkermansia	Akkermansia_muciniphila	0.112705	0.422553	0.233437
2.2.1.9	decompensated	Bacteroides	Bacteroides_caccae	2.39615	3.47109	0.233437
2.2.1.9	decompensated	Bacteroides	Bacteroides_cellulosilyticus	0.142636	0.670866	0.233437
2.2.1.9	decompensated	Prevotella	Prevotella_sp_F0091	0.00564259	0.0374287	0.233437
2.2.1.9	decompensated	Prevotella	Prevotella_sp_oral_taxon_306	0.00572964	0.0312933	0.233437
2.2.1.9	decompensated	Eisenbergiella	Eisenbergiella_tayi	0	0	0.233437
2.2.1.9	decompensated	Enterobacter	Enterobacter_bugandensis	0.000808364	0.00536208	0.233437
2.2.1.9	decompensated	Enterobacter	Enterobacter_cloacae_complex	0.0326048	0.177065	0.233437
2.2.1.9	decompensated	Enterobacter	Enterobacter_mori	0.0009275	0.00615234	0.233437
2.2.1.9	decompensated	Bacteroides	Bacteroides_eggerthii	0.105969	0.630385	0.233437
2.2.1.9	decompensated	Bacteroides	Bacteroides_faecis	0	0	0.233437
2.2.1.9	decompensated	Bacteroides	Bacteroides_finegoldii	0.802726	2.05623	0.233437
2.2.1.9	decompensated	Bacteroides	Bacteroides_fluxus	0	0	0.233437
2.2.1.9	decompensated	Bacteroides	Bacteroides_fragilis	1.2086	2.61841	0.233437
2.2.1.9	decompensated	Bacteroides	Bacteroides_fragilis_CAG_47	0.239778	0.54616	0.233437
2.2.1.9	decompensated	Bacteroides	Bacteroides_intestinalis	0.145563	0.730901	0.233437
2.2.1.9	decompensated	Coprobacter	Coprobacter_secundus	0	0	0.233437
2.2.1.9	decompensated	Eggerthella	Eggerthella_lenta	0	0	0.233437
2.2.1.9	decompensated	Parabacteroides	Parabacteroides_distasonis	1.36752	2.06473	0.233437
2.2.1.9	decompensated	Parabacteroides	Parabacteroides_goldsteinii	0.0158311	0.0834951	0.233437
2.2.1.9	decompensated	Parabacteroides	Parabacteroides_gordonii	0.0308755	0.204805	0.233437
2.2.1.9	decompensated	Klebsiella	Klebsiella_michiganensis	0	0	0.233437
2.2.1.9	decompensated	Veillonella	Veillonella_infantium	0.854867	1.38923	0.233437
2.2.1.9	decompensated	Prevotella	Prevotella_buccae	0.395311	1.68875	0.233437
2.2.1.9	decompensated	Raoultella	Raoultella_planticola	0.0084142	0.0558135	0.233437
2.2.1.9	decompensated	Sanguibacteroides	Sanguibacteroides_justesenii	0	0	0.233437
2.2.1.9	decompensated	Parabacteroides	Parabacteroides_johnsonii	0.0352105	0.183602	0.233437
2.2.1.9	decompensated	Veillonella	Veillonella_parvula	2.82965	5.54887	0.233437
2.2.1.9	decompensated	Kluyvera	Kluyvera_georgiana	0.00465241	0.0308606	0.233437
2.2.1.9	decompensated	Bacteroides	Bacteroides_uniformis	0.734804	1.82293	0.233437
2.2.1.9	decompensated	Bacteroides	Bacteroides_vulgatus_CAG_6	8.30461	6.85504	0.233437
2.2.1.9	decompensated	Veillonella	Veillonella_sp_CAG_933	0	0	0.233437
2.2.1.9	decompensated	Veillonella	Veillonella_rodentium	0	0	0.233437
2.2.1.9	decompensated	Veillonella	Veillonella_rogosae	0.351373	0.851735	0.233437
2.2.1.9	decompensated	Bacteroides	Bacteroides_thetaiotaomicron	3.5975	4.48574	0.233437
2.2.1.9	decompensated	Enterococcus	Enterococcus_gallinarum	0	0	0.233437
2.2.1.9	decompensated	Haemophilus	Haemophilus_parahaemolyticus	0.00678945	0.0419375	0.233437
2.2.1.9	decompensated	Haemophilus	Haemophilus_parainfluenzae	0.879786	1.3911	0.233437
2.2.1.9	decompensated	Escherichia	Escherichia_coli	7.81097	19.6287	0.233437
2.2.1.9	decompensated	Citrobacter	Citrobacter_koseri	0	0	0.233437
2.2.1.9	decompensated	Citrobacter	Citrobacter_portucalensis	0.00325482	0.02159	0.233437
2.2.1.9	decompensated	Citrobacter	Citrobacter_werkmanii	0.00140527	0.00932152	0.233437
2.2.1.9	decompensated	Citrobacter	Citrobacter_youngae	0.00174273	0.00893766	0.233437
2.2.1.9	decompensated	Coprobacter	Coprobacter_fastidiosus	0	0	0.233437
2.2.1.9	decompensated	Prevotella	Prevotella_copri_CAG_164	4.69664	13.5928	0.233437
2.2.1.9	decompensated	Haemophilus	Haemophilus_quentini	0	0	0.233437
2.2.1.9	decompensated	Haemophilus	Haemophilus_sp_HMSC71H05	0.605297	1.96674	0.233437
2.2.1.9	decompensated	Haemophilus	Haemophilus_sputorum	0	0	0.233437
2.2.1.9	decompensated	Hungatella	Hungatella_hathewayi	0.0259468	0.110471	0.233437
2.2.1.9	decompensated	Klebsiella	Klebsiella_aerogenes	0	0	0.233437
2.2.1.9	decompensated	Enterococcus	Enterococcus_faecalis	0	0	0.233437
2.2.1.9	decompensated	Klebsiella	Klebsiella_oxytoca	0.163935	0.724583	0.233437
2.2.1.9	decompensated	Klebsiella	Klebsiella_pneumoniae	2.60953	9.29868	0.233437
2.2.1.9	decompensated	Klebsiella	Klebsiella_quasipneumoniae	0.0130801	0.0647957	0.233437
2.2.1.9	decompensated	Klebsiella	Klebsiella_variicola	0.0735954	0.460352	0.233437
2.2.1.9	decompensated	Kluyvera	Kluyvera_ascorbata	0.000468432	0.00310723	0.233437
2.2.1.9	decompensated	Kluyvera	Kluyvera_cryocrescens	0.0153522	0.101835	0.233437
2.2.1.9	decompensated	Bacteroides	Bacteroides_massiliensis	1.45492	3.31191	0.233437
[truncated: 1,438 more rows]

## Sheet: Table S9
Table S9. Nucleotide sequences of bsh used for Xander analysis. Sequences were downloaded from FunGenes (http://fungene.cme.msu.edu/)
[truncated: 6,680 more rows]

[truncated: 1 more sheets: Table S10]
